# Supplementary material for: Immunopathology and Trypanosoma congolense parasite sequestration cause acute cerebral trypanosomiasis
Source: eLife. 2022 Jul 5;11:e77440. doi: 10.7554/eLife.77440 (PMC9307270; doi:10.7554/eLife.77440)
Supplement: Source data 1. [file elife-77440-data1.xlsx]

## Sheet: Fig1A
1/148
	Experiment 1		Experiment 2		Experiment 3
Days P.I.	# animals	%	# animals	%	# animals	%
1	4	1	3	1	3	1
2	4	1	3	1	3	1
3	4	1	3	1	3	1
4	4	1	3	1	3	1
5	4	1	3	1	3	1
6	4	1	3	1	3	1
7	4	1	3	1	2	0.666667
8	3	0.75	0	0	0	0
9	1	0.25	0	0	0	0
10	0	0	0	0	0	0
	Plotted in figure
IL3000
	Experiment 1
Days P.I.	# animals	%
0	4	1
5	4	1
10	4	1
15	4	1
20	4	1
25	4	1
30	4	1
35	4	1
40	4	1
45	4	1
50	4	1
55	4	1
60	4	1
65	4	1
70	3	0.75
75	2	0.5
80	2	0.5
85	1	0.25
90	0	0

## Sheet: Fig1B
strain 1/148
		Days Post-infection
Experiment #		1	2	3	4	5	6	7	8	9	10
1	Mouse 1	0	0	0	1500000	35250000	97500000	72750000	46500000	-	-	Plotted in Figure
	Mouse 2	0	0	0	750000	4500000	73500000	133500000	156000000	-	-
	Mouse 3	0	375000	375000	750000	47250000	112500000	220500000	-	-	-
	Mouse 4	0	0	0	750000	12750000	123000000	109500000	96000000	11250000	-
2	Mouse 1	0	0	0	0	375000	12000000	45000000	87000000	-	-
	Mouse 2	0	0	0	0	0	16500000	48000000	172500000	-	-
	Mouse 3	0	0	0	0	0	12000000	40500000	96000000	-	-
3	Mouse 1	0	0	0	0	0	5250000	39000000	181500000	-	-
	Mouse 2	0	0	0	750000	14250000	25500000	138000000	66000000	-	-
	Mouse 3	0	0	0	375000	7000000	56250000	132000000	-	-	-
strain IL3000		Days Post-infection
		0	2	3	4	5	6	7	8	9	10	11	12	13	14	15	16	17	18	19	20	21	22	23	24	25	27	29	31	33	35	37	39	41	43	46	49	52	55	58	61	64	67	70	73	76	79	82	85
1	Mouse 1	0	0	0	0	375000	750000	0	0	750000	6000000	40500000	23250000	500000	750000	3375000	15500000	25125000	0	375000	0	0	0	6750000	7125000	750000	4125000	5625000	9000000	2250000	1125000	6000000	4125000	2625000	8500000	30000000	47500000	18000000	3000000	12750000	13500000	50000000	-	-	-	-	-	-	-
	Mouse 2	0	0	0	0	0	0	750000	1500000	10500000	32250000	39750000	0	0	1500000	26625000	7500000	375000	0	0	8250000	40500000	5250000	750000	1875000	375000	1500000	1500000	0	0	0	5250000	3750000	0	750000	750000	0	750000	1875000	1875000	3000000	4000000	26250000	24750000	15000000	-	-	-	-
	Mouse 3	0	0	0	0	0	375000	375000	375000	1125000	16500000	36750000	0	0	0	6750000	22500000	5250000	0	375000	0	750000	1500000	4875000	0	0	0	1125000	375000	375000	0	375000	1500000	0	3000000	0	0	0	0	1125000	0	2250000	1500000	1875000	10500000	16500000	24000000	2250000	-
	Mouse 4	0	0	0	0	0	0	750000	0	375000	16500000	42000000	18000000	0	0	1125000	15000000	27375000	5250000	0	375000	0	3375000	4875000	1125000	750000	750000	3750000	0	0	1875000	9000000	27375000	29250000	31500000	14250000	2625000	8625000	15000000	17250000	56250000	33750000	79500000	33000000	28500000	37500000	43500000	2250000	0

## Sheet: Fig1C
	strain ID	1/148							IL3000
	mouse #	1	2	3	4	5	6	7	1	2	3	4
Tissue	Brain	3	4	4	4	4	3.5	3	0	0	0	1
	Gonadal Fat	1	0	1	1	0	0	0	0	0	0	0
	Gonads	1	0	1	1	0	0	0	0	0	0	2
	Heart	1	0	1	0	2	2	2	0	0	1	1
	Kidney	1	2	0	2	4	3	2	0	0	0	0
	Liver	3	3	3	3	3.5	3.5	2.5	1	2	3	4
	Lung	2	2	2	2	2	2		0	0	0	0
	Pancreas	3	3	3	3	0			0	0	0	0
	Spleen	3	3	3	3	3	2		2.5	2.5	2.5	2.5
	Thymus	4	4	4					0	2.5	3	3
		Experiment replicate 1			Experiment replicate 2				Experiment replicate 1
	scale:
	0	absent
	1	minimal
	2	mild
	3	moderate
	4	marked

## Sheet: Fig1F
		mg/dL		ug/mL
Strain	Animal ID	Ureia	Creatinina	NGAL
1/148	A1	79.7	0.33	13.19
1/148	A2	63.1	0.3	6.51
1/148	A3	70.7	0.3	11.7
1/148	A4	90.1	0.29	13.65
1/148	A5	63.4	0.31	6.71
IL3000	C1	46.1	0.38	0.51
IL3000	C2	65.8	0.39	0.51
IL3000	C3	68.2	0.35	0.72
IL3000	C4	68.8	0.36	0.28
IL3000	C5	65.7	0.36	1.41

## Sheet: Fig1I-J
		Brain				gWAT				Heart				Kidney				Liver				Lungs				Pancreas				Spleen
strain	Days Post-Infection	1	2	3	4	1	2	3	4	1	2	3	4	1	2	3	4	1	2	3	4	1	2	3	4	1	2	3	4	1	2	3	4
1/148	1	3.1457	1.88703	2.63361		0.0001	3.48	3.53		3.53	3.57	1e-05	1e-05	3.23832	1e-05	1e-05		2.59585	3.75816	3.92906	1e-05	3.30131	1e-05	3.67925		1.18867	1e-05	0.940048	1e-05	1e-05	3.6127	1e-05
	2	1.95811	2.05346	2.18747		3.42	3.67	2.5862		3.42	1.99	3.41	1e-05	1e-05	1.83645	2.97221		2.14701	2.61932	3.14044	1e-05	2.48227	1.22659	1e-05		1e-05	1e-05	1e-05	1e-05	1.73479	3.97413	2.54369
	3	2.12066	0.807011	1.68921		2.8725	3.35	1.0857		2.6465	3.43	1e-05	1e-05	1e-05	3.08179	1e-05		3.54122	3.50701	3.50823	1e-05	2.69336	0.726526	1e-05		1e-05	1e-05	1e-05	1e-05	1.95035	3.4732	1e-05
	4	3.51956	5.25625	1.8474		3.63	1.2276	2.6197		3.27	1.925	3.53	1e-05	3.37218	1.68274	3.12516		3.26513	3.15413	3.08609	1e-05	0.839894	1.07062	3.50896		2.16204	0.138529	0.186373	1e-05	3.59787	0.511983	4.16458
	5	4.21084	1.76781	2.63032		0.9639	4.606	4.98		2.035	1e-05	1.4223	1e-05	1e-05	3.638	3.8345		3.12068	2.11625	1.59482	1e-05	1.6264	2.85438	1e-05		0.567713	0.293045	2.54413	1e-05	1.24039	3.884	4.56357
	6	4.28829	4.95695	4.58866	3.81654	0.495	1.704	4.403	1.06	3.403	1.96	1.6986	1e-05	4.03805	2.54435	2.80909		2.46853	1.76129	3.15226	3.07593	1.446	1.78253	2.99803		3.6646	3.90057	3.67721	2.97303	4.39828	3.29005	1e-05
IL3000	First peak (day 7/8)	2.71867	2.96136	3.35184		1.90314	1.8171	3.54656		4.30004	4.92896	4.63375	4.13037	5.20626	1e-05	4.18896		0.864	2.556	2.409	2.6169	4.7385	4.617	4.0588	3.9576	2.1714	1.9651	2.1903	1.2663	4.72	4.29	4.57	4.71
	Second Peak (day 12-14)	1.25816	3.11857	2.72096		2.83194	1.85294	3.90891		4.40104	4.59534	3.46572	1e-05	4.21789	3.65886	3.58756		3.488	3.5862	2.365	3.7989	0.765	0.2376	0.8288		3.4155	1.4168	1.8942	0.0001	2.8665	2.985	1.845
	Post-second peak	1e-05	1e-05	0		0.0001	0.0001	0.0001		3.15369	4.06383	0.0001	0.0001	0.0001	0.0001	0.0001		0.0001	0.0001	0.0001	0.0001	3.1	3.24	0		1.85	3.6	1.2804	0.0001	3.36	0.0001	2.9

## Sheet: Fig2A-B
		Parasite load (Parasites / cm2 vessel)										Percentage of Parasite Sequestration (Sequestered parasites / Parasite Load * 100)
		1/148				IL3000						1/148				IL3000
		1	2	3	4	1	2	3	4			1	2	3	4	1	2	3	4
	Olfactory bulb	273307	414070	561501	384305	163631	182143	268186	255870		Olfactory bulb	77.0642	75.2137	72.2892	76.2376	27.9412	18.5714	23.0769	9.375
	Cerebral cortex	401555	449918	468243	395070	114665	119216	113889	100813		Cerebral cortex	71.6895	74.1071	68.2403	77.3399	27.8689	23.7288	16.9811	22.2222
	Septum	271003	249003	284776	275980	162351	168927	127312	134456		Septum	76.9912	73.4375	72.5191	64.1667	44.6154	48.5714	38.3333	38.1818
	Hippocampus	176923	284302	290389	378263	148516	142421	116028	113031		Hippocampus	68.2353	61.9048	67.5439	75.5725	43.9394	38.9831	27.2727	30.7692
	Thalamus	223270	220336	222120	260366	157629	120352	145170	129045		Thalamus	67.3913	68.9655	74.026	78.1609	36.6667	25.5319	38.1818	43.3962
	Hypothalamus	407840	360159	368290	449811	268969	331977	277954	271461		Hypothalamus	48.5714	60.8696	76.3889	75.2577	40.3846	39.6552	38.4615	50
	Midbrain	500990	420973	420323	467889	343377	362127	329699	399262		Midbrain	69.4118	72.3684	61.3333	76.4706	60.7143	60.3448	58.1818	62.1212
	Pons	434530	582619	610204	612390	214373	195247	210284	257692		Pons	59.8592	76.6667	78.2895	70.8609	58.0247	53.6232	69.3548	62.1622
	Medulla	495089	504802	755567	620316	263701	297966	295935	291000		Medulla	53.8922	64.5503	75.8389	68.1319	66.6667	66.055	59.2233	57.9545
	Cerebellum	896426	715997	835613	967992	456129	459440	398517	434813		Cerebellum	69.967	70.438	78.7671	70.5686	70.8333	70.0599	62.3377	61.3333

## Sheet: Fig2C
	Parasite load (Parasites / cm2 vessel)									Percentage of Parasite Sequestration (Sequestered parasites / Parasite Load * 100)
	1/148				IL3000					1/148				IL3000
Vessel diameter	0-10um	10-20um	20-40um	40>um	0-10um	10-20um	20-40um	40>um		0-10um	10-20um	20-40um	40>um	0-10um	10-20um	20-40um	40>um
	75689.9	47526.5	33800.1	28053.2	82553.9	24866.5	24271.1	17036.7		100	50	100	50	100	0	100	100
	85317.7	63770.8	38296.4	35600.2	91402.7	34985.5	24993	25663.6		100	100	0	100	0	100	100	100
	90979.4	70310.1	53319.4	39870	109506	43642.2	25848.7	25967.9		100	50	100	100	50	100	50	100
	126043	86830.8	53597.7	59227.1	141621	95339.3	28412.4	30018.9		0	100	100	100	100	100	0	50
	142611	92125.1	54721.2	102842	253354	96857.5	33703.9	42291.7		100	0	100	67	50	100	0	75
	268269	92845.3	68347.2	108404	611583	98342	40884.9	43126.6		100	67	0	100	100	100	50	100
	281357	98912	73046.8	109211	843218	110359	42201	48027.3		100	100	50	80	33	50	100	0
	394306	113138	78514.5	134722	982222	112398	49469.2	51427.9		100	0	67	86	0	100	100	0
	405110	119080	100903	138079		124665	50312.9	52584.4		67	100	67	80		50	100	50
	411590	152850	116443	192726		134743	53213.6	53741.9		67	0	100	81		67	50	67
	454236	207044	125665	204696		146292	55512.5	63232		100	50	75	67		50	100	100
	486500	277561	125870	245119		153885	57462.5	65491.5		100	100	57	54		100	50	75
	502260	282568	126259	256868		166316	58252.7	69311.3		100	100	80	62		0	50	100
	518484	299340	158721			166382	65999.5	69398.9		0	71	50			75	67	75
	1.22835e+06	395531	167186			233434	68045.1	70755.1		100	100	75			80	100	100
	1.64616e+06	418971	170678			268918	69915.7	78991.3		75	88	88			17	40	80
		465566	208936			285404	75087.1	83096.9			50	50			100	33	0
		527065	211085			318822	79688.9	93651.7			100	91			50	33	38
		1.02445e+06	250446			495381	99160.1	94628.5			77	73			33	100	43
		1.88263e+06	266162			970935	112432	97004.7			95	86			17	100	40
			422672				125190	103689				100				67	100
							137069	105189								50	60
							140515	138983								67	13
							149063	239267								83	67
							203186									71
							259171									25
							264085									100
							319206									100

## Sheet: Fig2D-E
	1/148											IL3000
	Olfactory bulb	Cerebral cortex	Septum	Hippocampus	Thalamus	Hypothalamus	Midbrain	Pons	Medulla	Cerebellum		Olfactory bulb	Cerebral cortex	Septum	Hippocampus	Thalamus	Hypothalamus	Midbrain	Pons	Medulla	Cerebellum
	203	378	203	109	97	206	317	617	798	1118		105	109	149	98	75	199	108	205	295	409
	109	305	106	131	91	215	309	593	745	976		126	57	157	96	63	208	116	109	213	417
	390	291	194	116	115	198	298	635	903	931		208	75	198	109	89	205	121	115	299	375
	290	475	171	98	103	191	417	688	1105	1098		201	71	97	175	88	317	95	216	302	517
	208	758	208	107	97	207	403	575	798	1176		105	48	91	113	75	291	91	198	319	509
	129	721	417	202	86	293	198	471	871	945		123	106	73	79	71	211	75	231	404	516
	451	476	309	115	81	276	309	399	834	1081		302	405	108	68	23	321	69	274	318	339
	203	508	376	123	99	299	436	523	902	1634		201	79	65	61	39	173	99	193	198	518
	208	431	108	135	143	205	415	486	1023	1402		117	71	121	79	37	166	105	116	192	599
	103	378	115	138	97	178	378	392	916	1723		123	48	118	59	65	401	118	105	216	316
	59	321	137	186	86	171	403	648	745	899		113	71	96	54	69	206	79	239	248	278
	51	507	181	145	88	231	507	601	717	1275		245	63	88	103	77	223	193	217	321	271
	108	303	193	187	137	227	391	388	836	1231		136	171	102	117	71	293	121	299	217	234
	70	328	198	202	97	197	337	421	699	896		147	97	178	203	93	191	75	176	221	431
	54	491	205	96	75	175	419	413	931	972		156	91	133	86	78	157	71	184	311	376
	403	476	318	78	71	276	493	632	908	1618		203	85	109	98	89	291	67	191	175	399
	527	566	406	105	15	299	519	538	976	1941		115	105	175	91	85	135	51	200	93	621
	291	698	156	123	39	203	509	515	748	1933		318	128	99	115	69	229	108	176	108	517
	309	491	191	119	88	283	499	602	717	798		215	31	109	163	78	327	203	184	251	412
	508	517	228	206	16	121	473	491	813	1066		118	48	136	203	71	401	177	115	306	408
	503	593	226	136	56	229	491	691	874	1041		271	59	208	105	82	251	76	193	171	499
	718	631	431	134	98	275	531	408	917	1173		209	63	295	98	84	208	85	108	103	318
	619	308	193	217	104	273	598	575	935	1208		318	67	377	63	45	316	81	207	302	399
	613	312	151	236	76	205	478	716	848	1316		253	78	105	61	73	217	95	304	219	417
	578	499	208	175	79	197	405	631	876	931		221	103	97	59	59	299	145	301	243	581
	544	521	193	171	91	131	399	612	716	997		109	91	71	88	88	306	112	176	269	513
	691	478	175	193	65	239	371	528	731	1402		96	107	88	123	93	227	98	75	288	315
	708	517	179	116	88	406	416	431	598	1171		78	85	93	145	108	315	136	15	316	509
	648	637	209	175	73	412	491	736	1321	1936		101	88	136	96	59	195	127	108	208	417
	721	608	327	118	95	321	478	699	1076	985		273	93	215	78	67	191	95	175	191	443
	455	379	299	90	103	317	533	457	1088	934		121	91	316	71	93	239	91	118	97	293
	329	321	341	86	99	408	565	536	943	1236		185	58	99	65	96	251	78	193	176	207
	378	497	405	107	75	221	487	515	913	1287		227	129	75	93	115	273	65	116	148	291
	491	718	381	137	81	237	431	764	716	957		213	203	87	98	78	117	91	231	157	521
	512	903	275	148	95	293	492	631	791	1093		198	39	76	107	71	126	109	209	119	388
	599	145	198	153	127	317	499	688	648	1631		191	51	131	115	96	115	99	217	226	416
	631	628	117	166	93	309	531	721	709	1439		176	75	267	208	93	108	143	268	234	308
	408	671	121	271	98	306	517	492	839	1515		131	98	205	211	75	131	100	113	173	377
	403	416	148	254	51	415	309	455	897	1333		104	91	299	174	86	176	97	121	161	395
	397	408	116	277	105	297	399	693	919	1900		221	105	111	108	88	155	91	103	118	345
	318	599	375	206	102	275	505	733	904	997		109	75	109	117	95	196	131	98	329	399
	405	431	193	215	101	283	398	602	843	1498		176	71	93	145	91	191	99	91	364	431
	401	478	403	299	97	288	317	524	817	1532		121	45	71	99	53	208	98	104	221	521
	391	521	118	271	91	309	408	586	776	1071		118	89	75	75	108	221	105	113	315	536
	408	548	121	178	84	317	416	715	745	993		303	108	88	71	96	176	127	183	187	391
	299	603	193	163	113	196	521	599	591	978		223	63	175	54	78	187	144	145	117	467
	309	499	208	178	95	191	533	324	678	1005		109	71	103	50	71	193	78	94	328	492
	701	731	210	106	57	213	408	588	631	935		145	98	92	39	99	99	91	98	317	399
	198	203	415	129	69	106	431	541	694	1233		98	91	81	48	57	172	35	103	377	453
	115	199	306	206	87	186	398	734	733	1051		73	104	73	47	66	89	66	101	205	517
	431	186	296	199	93	199	499	498	896	931		203	49	76	56	59	95	89	39	293	318
	478	493	223	134	99	274	517	532	815	1291		109	57	69	51	85	115	81	186	274	399
	521	631	115	98	113	316	506	516	732	1344		175	51	108	98	97	213	138	191	299	374
	573	609	319	171	117	299	499	613	719	988		303	99	179	91	91	125	156	208	216	317
		521	269	65	105	301	391	609	697	1045			103	118	103	77	100	174	113	288	594
		537	271	89	95	323	308	521	824	1233			98	206	123	103	321	97	145	194	442
		716	331	113	91	198	416	578	862	1327			75	215	105	101	216	91	151	117	435
		548	217	148	87	205	499	633	741	997			71	121	33	99	275	66	195	145	351
		521	292	129	80	388	588	727	716	1613			96	99	95	103	193	87	175	108	391
		417	301	103	113	213	591	708	913	944			99	137	91	98	117	95	172	237	475

## Sheet: Fig2G
		1/148			IL3000
	Mouse #	1	2	3	1	2	3		Averages	1/148	IL3000	Total Parasites/cm2 vessel 1/148	Pearson's Correlation	Total Parasites/cm2 vessel IL3000	Pearson's Correlation
	Olfactory bulb	203	309	631	105	215	176		Olfactory bulb	392	172.926	408296	0.958368	217458	0.776594
		109	508	408	126	118	131		Cerebral cortex	493.333	89.1	428696		112146
		390	503	403	208	271	104		Septum	365.742	134.017	270191		148261
		290	718	397	201	209	221		Hippocampus	154.683	98.7833	282469		129999
		208	619	318	105	318	109		Thalamus	89.3667	79.6833	231523		138049
		129	613	405	123	253	176		Hypothalamus	255.65	211.05	396525		287590
		451	578	401	302	221	121		Midbrain	443.333	103.4	452544		358616
		203	544	391	201	109	118		Pons	574.8	163.317	559936		219399
		208	691	408	117	96	303		Medulla	827.783	230.95	593943		287151
		103	708	299	123	78	223		Cerebellum	1220.07	418.6	854007		437225
		59	648	309	113	101	109
		51	721	701	245	273	145
		108	455	198	136	121	98
		70	329	115	147	185	73
		54	378	431	156	227	203
		403	491	478	203	213	109
		527	512	521	115	198	175
		291	599	573	318	191	303
	Cerebral cortex	378	593	599	109	59	75
		305	631	431	57	63	71
		291	308	478	75	67	45
		475	312	521	71	78	89
		758	499	548	48	103	108
		721	521	603	106	91	63
		476	478	499	405	107	71
		508	517	731	79	85	98
		431	637	203	71	88	91
		378	608	199	48	93	104
		321	379	186	71	91	49
		507	321	493	63	58	57
		303	497	631	171	129	51
		328	718	609	97	203	99
		491	903	521	91	39	103
		476	145	537	85	51	98
		566	628	716	105	75	75
		698	671	548	128	98	71
		491	416	521	31	91	96
		517	408	417	48	105	99
	Septum	203	226	375	149	208	109
		106	431	193	157	295	93
		194	193	403	198	377	71
		171	151	118	97	105	75
		208	208	121	91	97	88
		417	193	193	73	71	175
		309	175	208	108	88	103
		376	179	210	65	93	92
		108	209	415	121	136	81
		115	327	306	118	215	73
		137	299	296	96	316	76
		181	341	223	88	99	69
		193	405	115	102	75	108
		198	381	319	178	87	179
		205	275	269	133	76	118
		318	198	271	109	131	206
		406	117	331	175	267	215
		156	121	217	99	205	121
		191	148	292	109	299	99
		228	116	301	136	111	137
	Hippocampus	109	136	206	98	105	117
		131	134	215	96	98	145
		116	217	299	109	63	99
		98	236	271	175	61	75
		107	175	178	113	59	71
		202	171	163	79	88	54
		115	193	178	68	123	50
		123	116	106	61	145	39
		135	175	129	79	96	48
		138	118	206	59	78	47
		186	90	199	54	71	56
		145	86	134	103	65	51
		187	107	98	117	93	98
		202	137	171	203	98	91
		96	148	65	86	107	103
		78	153	89	98	115	123
		105	166	113	91	208	105
		123	271	148	115	211	33
		119	254	129	163	174	95
		206	277	103	203	108	91
	Thalamus	97	56	102	75	82	95
		91	98	101	63	84	91
		115	104	97	89	45	53
		103	76	91	88	73	108
		97	79	84	75	59	96
		86	91	113	71	88	78
		81	65	95	23	93	71
		99	88	57	39	108	99
		143	73	69	37	59	57
		97	95	87	65	67	66
		86	103	93	69	93	59
		88	99	99	77	96	85
		137	75	113	71	115	97
		97	81	117	93	78	91
		75	95	105	78	71	77
		71	127	95	89	96	103
		15	93	91	85	93	101
		39	98	87	69	75	99
		88	51	80	78	86	103
		16	105	113	71	88	98
	Hypothalamus	206	229	275	199	251	196
		215	275	283	208	208	191
		198	273	288	205	316	208
		191	205	309	317	217	221
		207	197	317	291	299	176
		293	131	196	211	306	187
		276	239	191	321	227	193
		299	406	213	173	315	99
		205	412	106	166	195	172
		178	321	186	401	191	89
		171	317	199	206	239	95
		231	408	274	223	251	115
		227	221	316	293	273	213
		197	237	299	191	117	125
		175	293	301	157	126	100
		276	317	323	291	115	321
		299	309	198	135	108	216
		203	306	205	229	131	275
		283	415	388	327	176	193
		121	297	213	401	155	117
	Midbrain	317	491	505	108	76	131
		309	531	398	116	85	99
		298	598	317	121	81	98
		417	478	408	95	95	105
		403	405	416	91	145	127
		198	399	521	75	112	144
		309	371	533	69	98	78
		436	416	408	99	136	91
		415	491	431	105	127	35
		378	478	398	118	95	66
		403	533	499	79	91	89
		507	565	517	193	78	81
		391	487	506	121	65	138
		337	431	499	75	91	156
		419	492	391	71	109	174
		493	499	308	67	99	97
		519	531	416	51	143	91
		509	517	499	108	100	66
		499	309	588	203	97	87
		473	399	591	177	91	95
	Pons	617	691	733	205	193	98
		593	408	602	109	108	91
		635	575	524	115	207	104
		688	716	586	216	304	113
		575	631	715	198	301	183
		471	612	599	231	176	145
		399	528	324	274	75	94
		523	431	588	193	15	98
		486	736	541	116	108	103
		392	699	734	105	175	101
		648	457	498	239	118	39
		601	536	532	217	193	186
		388	515	516	299	116	191
		421	764	613	176	231	208
		413	631	609	184	209	113
		632	688	521	191	217	145
		538	721	578	200	268	151
		515	492	633	176	113	195
		602	455	727	184	121	175
		491	693	708	115	103	172
	Medulla	798	874	904	295	171	329
		745	917	843	213	103	364
		903	935	817	299	302	221
		1105	848	776	302	219	315
		798	876	745	319	243	187
		871	716	591	404	269	117
		834	731	678	318	288	328
		902	598	631	198	316	317
		1023	1321	694	192	208	377
		916	1076	733	216	191	205
		745	1088	896	248	97	293
		717	943	815	321	176	274
		836	913	732	217	148	299
		699	716	719	221	157	216
		931	791	697	311	119	288
		908	648	824	175	226	194
		976	709	862	93	234	117
		748	839	741	108	173	145
		717	897	716	251	161	108
		813	919	913	306	118	237
	Cerebellum	1118	1041	997	409	499	399
		976	1173	1498	417	318	431
		931	1208	1532	375	399	521
		1098	1316	1071	517	417	536
		1176	931	993	509	581	391
		945	997	978	516	513	467
		1081	1402	1005	339	315	492
		1634	1171	935	518	509	399
		1402	1936	1233	599	417	453
		1723	985	1051	316	443	517
		899	934	931	278	293	318
		1275	1236	1291	271	207	399
		1231	1287	1344	234	291	374
		896	957	988	431	521	317
		972	1093	1045	376	388	594
		1618	1631	1233	399	416	442
		1941	1439	1327	621	308	435
		1933	1515	997	517	377	351
		798	1333	1613	412	395	391
		1066	1900	944	408	345	475

## Sheet: Fig2H
	Duration of sequestration (hours)
	1/148	IL3000
	0.5	0.5
	0.5	2.5
	0.5	2
	0.5	2.5
	0.5	2
	1	2
	1	3.5
	1	3.5
	1.5	3
	1.5	3
	1.5	2.5
	1.5	2
	2	1.5
	2	0.5
	2	0.5
	2	1.5
	2	2.5
	2	1.5
	2	1.5
	2	2.5
	2.5	3.5
	2.5	3
	2.5	3
	2.5	5.5
	2.5	5.5
	2.5	4.5
	2.5	3.5
	3	3
	3	3
	3	3
	3.5	2.5
	3.5	2.5
	3.5	2
	3.5	2.5
	3.5	1.5
	3.5	1.5
	3.5	3.5
	3.5	3.5
	3.5	1.5
	4	2.5
	4	3.5
	4	3.5
	4	2.5
	4	3.5
	4	3.5
	4	1.5
	4	1.5
	4.5	1
	4.5	1
	4.5	1.5
	4.5	2.5
	4.5	2.5
	4.5	2
	4.5	1.5
	5	1
	5	6.5
	5	6
	5	1.5
	5	1
	5	1
	5	2.5
	5	2
	5	1.5
	5	0.5
	5.5	0.5
	5.5	1.5
	5.5	0.5
	5.5	2.5
	5.5	2.5
	5.5	1.5
	5.5	0.5
	6	0.5
	6	1.5
	6	1.5
	6	0.5
	6	0.5
	6	0.5
	6	0.5
	6	1.5
	6	5.5
	6	1.5
	6	0.5
	6	1.5
	6	0.5
	6	0.5
	6	0.5
	6	1.5
	6	1.5
	6	0.5
	6.2	2.5
	6.5	2.5
	6.5	2
	6.5	1.5
	6.5	2
	6.5	2
	6.5	3.5
	6.5	2.5
	6.5	2.5
	6.5	1.5
	6.5	1.5
	7	0.5
	7	0.5
	7	1.5
	7	2.5
	7	2.5
	7.5	1.5
	7.5	3
	8
	8
	8
	8
	8

[truncated: 15 more sheets: Fig3E, Fig4A, Fig4B-J, Fig5B, Fig5C, Fig5E, Fig5G, Fig6B, Fig6D, Fig6E, Fig6F, Fig6G, Fig6H, Fig7C, Fig7D]
