# Supplementary material for: Immunopathology and Trypanosoma congolense parasite sequestration cause acute cerebral trypanosomiasis
Source: eLife. 2022 Jul 5;11:e77440. doi: 10.7554/eLife.77440 (PMC9307270; doi:10.7554/eLife.77440)
Supplement: Source data 2. [file elife-77440-data2.xlsx]

## Sheet: Figure 1 Supplement 1
A
		Brain				gWAT				Heart				Kidney				Liver				Lungs				Pancreas				Spleen
		1	2	3	4	1	2	3	4	1	2	3	4	1	2	3	4	1	2	3	4	1	2	3	4	1	2	3	4	1	2	3	4
1/148	1	3.1457	4.19339	3.93076			3.48	3.53		3.53	3.57			3.23832				3.87441	3.75816	3.92906		3.30131	3.91187	3.67925		4.57181		4.47642			3.6127
	2	4.45025	4.66695	4.37494		3.42	3.67	3.86		3.42	3.98	3.41		3.35343	3.6729	3.71526		4.77113	4.43952	5.06523		4.77361	4.90634	4.5398		4.60041		3.56114		4.68861	4.46532	4.38567
	3	5.17235	5.04382	5.27877		3.83	3.35	3.29		3.95	3.43			3.12031	3.713			4.59899	4.27684	4.38529		4.7252	4.84351			4.28657	4.77475	4.59262		4.53571	4.45282	3.86889
	4	5.02794	5.25625	5.43353		3.63	3.72	3.91		3.27	3.85	3.53		3.83202	4.20684	4.16687		4.47278	5.00655	4.74784		4.66608	5.35308	5.39841		4.32408	4.61764	4.65934		5.13981	4.6544	4.47804
	5	4.84004	5.357	5.47983		4.59	4.7	4.98		4.07		4.31			4.13409	4.35738		4.45811	4.23251	3.98705		4.92848	5.00768			4.05509	4.88409	4.9885		4.96155	4.31556	5.1276
	6	5.29419	5.21784	5.1558	5.45221	4.95	4.26	5.18	4.24	4.1	3.92	4.47		4.64144	3.79753	5.01623		4.74718	4.40322	4.31817	5.0425	5.1643	4.34764	4.99672		4.63874	3.90057	5.10724	3.96404	4.72933	4.11256
IL3000	Peak 1	4.94303	5.01925	4.78834		4.87986	4.43196	4.66652		4.30004	5.29996	4.98253	5.03704	5.20626		4.18896		4.32	4.26	4.38	4.29	5.85	5.7	5.56	5.82	4.62	4.57	4.47	4.69	4.72	4.29	4.57	4.71
	Peak 2	5.24232	5.19762	5.33522		5.14899	4.63234	3.90891		5.05867	5.282	5.33188		4.43988	4.57358	4.59944		4.36	4.17	4.73	4.69	5.1	5.94	5.92		4.95	5.06	4.62		4.41	3.98	3.69
	Post-Peak2	4.14453	3.5951							3.79962	4.06383											3.1	3.24			3.7	3.6	3.88		3.36		2.9
B
		Brain				gWAT				Heart				Kidney				Liver				Lungs				Pancreas				Spleen
		1	2	3	4	1	2	3	4	1	2	3	4	1	2	3	4	1	2	3	4	1	2	3	4	1	2	3	4	1	2	3	4
1/148	1	100	45	67			100	100		100	100			100				67	100	100		100	0	100		26		21			100
	2	44	44	50		100	100	67		100	50	100		0	50	80		45	59	62		52	25	0		0		0		37	89	58
	3	41	16	32		75	100	33		67	100			0	83			77	82	80		57	15			0	0	0		43	78	0
	4	70	100	34		100	33	67		100	50	100		88	40	75		73	63	65		18	20	65		50	3	4		70	11	93
	5	87	33	48		21	98	100		50		33			88	88		70	50	40		33	57			14	6	51		25	90	89
	6	81	95	89	70	10	40	85	25	83	50	38		87	67	56		52	40	73	61	28	41	60		79	100	72	75	93	80	50
IL3000	Peak 1	55	59	70		39	41	76		100	93	93	82	100		100		20	60	55	61	81	81	73	68	47	43	49	27	100	100	100	100
	Peak 2	24	60	51		55	40	100		87	87	65		95	80	78		80	86	50	81	15	4	14		69	28	41		65	75	50
	Post-Peak2	0	0	0						83	100											100	100			50	100	33		100		100

## Sheet: Figure 3 Supplement 1
Cerebellum			Olfactory Bulb			Cerebral Cortex			Septum			Hippocampus			Thalamus			Hypothalamus			Midbrain			Pons			Medulla						1/148					IL3000
Non-infected	1/148	IL3000	Non-infected	1/148	IL3000	Non-infected	1/148	IL3000	Non-infected	1/148	IL3000	Non-infected	1/148	IL3000	Non-infected	1/148	IL3000	Non-infected	1/148	IL3000	Non-infected	1/148	IL3000	Non-infected	1/148	IL3000	Non-infected	1/148	IL3000				ICAM1	ICAM2	VCAM1			ICAM1	ICAM2	VCAM1
99.2	186.2	132.6	99.8	118.6	128.1	106.4	131.4	127.6	112.6	143.6	118.6	158.6	190.6	183.4	105.2	199.5	136.2	140.4	137.8	145.6	223.4	270.5	267.6	271.5	290.4	293.4	228.6	276.2	291.5			Brain	21	-7	11		Brain	30	5	-4
98.6	181.5	121.7	92.6	121.4	134.6	101.8	155.6	145.1	104.1	138.4	123.1	148.5	186.2	198.6	129.2	196.4	138.5	149.3	130.6	148.7	228.6	277.5	259.4	269.4	291.3	283.4	276.4	278.5	245.2			Lungs	44	-1	-11		Lungs	-11	0	0
112.5	193.6	109.4	106.5	112.6	128.6	106.3	158.3	148.6	121.3	149.3	128.6	141.9	181.9	184.2	118.6	206.4	149.5	150.4	140.6	141.6	217.5	238.5	266.4	208.7	298.3	279	281.5	261.9	216.6			Heart	46	33	-18		Heart	-15	36	-36
115.8	191.2	96.8	108.2	108.4	131.5	112.8	164.1	143.5	108.4	156.1	127.2	156.7	190.3	179.6	115.1	208.3	145.1	140.3	148.6	130.2	230.4	293.2	271.4	271.5	299.5	278.7	292.5	255.4	232.6			Liver	59	-1	131		Liver	16	93	100
97.6	178.6	91.6	101.7	115.6	139.7	109.5	168.2	141.6	116.5	178.4	118.5	158.2	179.2	171.8	118.6	201.4	118.6	139.5	142.6	133.5	244.6	238.5	208.1	239.4	216.5	219.6	291.5	209.4	276.4			Spleen	-39	-50	35		Spleen	9	56	-42
91.4	177.5	99.3	115.1	132.7	136.7	117.6	143.2	138.2	128.6	171.5	115.1	163.1	206.4	194.1	113.5	199.5	129.7	136.4	140.2	165.7	218.6	244.8	229.7	277.2	270.5	232.1	276.5	215.6	221.3			Pancreas	-30	2	-13		Pancreas	-3	10	0
93.6	190.6	110.6	99.82	128.5	126.7	105.8	109.1	121.6	121.8	176.2	108.6	118.6	201.8	190.2	128.6	109.8	132.6	131.4	139.7	168.2	247.7	218.5	230.4	208.1	208.5	279.4	299.5	299.6	292.5			Kidneys	5	52	107		Kidneys	-5	85	71
108.2	199.4	115.4	96.31	123.8	121.8	107.3	97.7	132.7	107.4	189.3	99.5	163.2	209.3	183.1	131.4	206.4	131.7	130.6	131.4	145.7	218.6	266.5	271.5	229.5	275.6	286.5	218.5	271.4	216.8			AT	27	-6	-21		AT	-1	19	1
116.9	188.4	134.9	108.4	106.3	126.8	115.1	107.6	121.7	117.6	182.5	90.3	159.6	195.4	184.6	138.6	190.4	140.3	129.6	140.9	148.6	236.6	280.6	198.7	236.7	287.8	290.3	223.6	270.4	271.4
115.7	175.1	131.6	107.6	118.5	127.4	100.3	131.6	118.6	132.1	181.4	109.6	151.8	191.8	188.1	112.7	118.6	129.7	145.8	137.6	144.3	218.7	295.7	280.4	215.1	299.5	218.5	218.7	215.6	255.4
123.8	196.2	138.7	99.6	123.6	128.6	108.6	156.5	115.4	116.4	176.4	115.4	156.7	117.6	190.4	130.4	140.4	121.6	140.2	139.4	138.6	220.4	218.6	229.5	289.8	218.6	266.5	232.5	299.1	218.6
86.1	199.4	127.2	97.2	115.8	136.1	98.7	158.7	156.7	123.1	172.3	178.1	158.2	150.8	191.6	160.7	145.6	128.5	155.3	136.7	139.2	230.4	273.5	237.4	236.4	231.7	261.8	290.4	218.2	273.5
80.4	99.7	130.8	98.3	127.6	134.8	91.6	163.1	151.8	108.4	159.6	115.6	151.6	193.2	176.1	100.5	150.5	130.6	148.6	138.2	139.6	216.5	288.6	244.6	197.5	214.8	236.7	278.9	206.4	229.6
104.3	102.6	127.2	95.2	121.7	131.7	103.5	159.7	149.7	116.6	160.5	106.2	163.1	191.5	180.4	115.1	162.5	134.6	149.6	140.1	144.2	214.8	281.5	271.5	272.6	221.6	232.4	280.4	222.4	218.6
110.2	115.4	136.4	96.3	118.5	108.6	107.4	151.6	140.2	131.4	166.7	104.1	168.7	180.5	178.2	108.6	168.9	131.6	148.7	146.5	118.7	209.5	274.2	208.6	231.5	234.4	245.8	266.2	289.4	248.5
96.3	190.3	138.9	99.8	132.6	115.4	101.3	170.1	136.7	123.6	168.9	90.7	173.2	188.4	167.2	116.7	129.5	139.6	150.6	160.4	129.5	211.5	290.3	219.9	208.4	289.8	199.6	218.5	215.6	221.5
91.2	113.6	141.5	95.1	131.4	121.6	126.8	183.6	131.8	121.8	172.4	91.7	179.2	193.2	188.1	123.1	138.2	133.2	155.4	141.6	121.7	198.4	215.6	199.6	215.6	208.7	218.6	230.4	211.4	288.4
93.6	108.1	119.7	97.2	108.5	136.4	131.6	188.2	143.9	123.4	177.5	90.5	118.6	179.6	193.2	150.6	140.2	139.4	156.8	148.7	139	190.6	198.5	206.5	218.6	216.5	213.9	221.6	288.6	231.8
98.7	123.6	120.8	97.6	120.7	138.5	104.7	193.7	145.4	118.4	177.6	100.5	131.5	170.4	115.8	154.4	145.8	129.5	152.3	144.6	111.6	173.4	199.6	215.4	211.1	178.8	209.5	234.8	291.4	276.1
95.4	121.5	115.7	109.5	138.4	136.1	116.5	191.1	118.6	109.4	189.4	124.6	140.4	199.3	119.5	117.6	149.5	121.6	160.4	180.2	153.2	178.6	208.6	208.6	209.8	129.6	215.8	221.5	290.3	218.4
96.3	199.5	118.2	93.6	123.6	131.6	115.1	135.7	119.6	121.4	188.4	121.9	160.4	192.8	175.6	119.1	167.1	145.5	156.5	146.3	154.8	224.1	278.6	278.6	276.4	298.5	228.5	209.5	299.5	223.4
98.2	175.2	136.5	106.1	121.8	130.4	118.6	133.6	109.7	134.1	181.4	130.6	162.7	178.6	171.5	124.6	172.3	143.6	148.6	139.2	155.4	209.4	221.5	227.5	215.6	219.7	221.3	221.5	208.3	221.8
105.1	169.3	131.8	104.2	105.6	121.6	107.1	121.8	118.5	138.6	178.7	128.8	156.2	188.4	178.4	121.4	150.4	138.5	147.2	131.5	143.8	206.7	230.5	236.6	194.8	288.6	236.8	230.4	216.9	236.5
106.6	170.1	121.6	115.7	104.2	115.4	116.7	118.5	156.2	188.6	171.4	121.6	158.6	181.9	182.6	122.6	123.4	131.9	152.4	139.5	142.2	217.5	215.7	276.5	199.5	223.5	234.5	297.3	238.9	219.3
112.1	165.9	108.6	118.1	101.8	92.1	99.6	137.4	145.6	129.5	168.4	130.6	130.6	190.5	181.4	108.1	143.6	140.3	151.9	140.6	118.2	218.5	230.5	221.5	195.2	219.7	216.9	288.5	274.1	218.4
86.3	154.8	116.3	94.3	122.5	98.6	95.8	138.1	148.1	128.7	161.4	131.4	167.4	196.3	145.6	104.5	149.5	121.5	147.6	143.4	139.5	220.3	221.5	238.6	190.4	236.5	236.5	267.5	288.6	229.1
88.9	112.6	112.2	82.6	99.6	91.6	106.7	115.6	170.5	122.4	170.5	118.6	166.3	208.1	171.4	173.2	150.3	128.6	148.6	135.6	144.8	240.4	218.5	231.5	186.7	229.5	229.5	238.6	276.5	230.4
93.6	96.4	109.6	88.1	94.3	94.5	119.1	127.5	110.4	136.4	186.7	115.4	167.4	206.4	172.3	130.6	127.6	130.5	152.3	131.4	140.2	218.6	231.4	208.9	188.9	236.9	232.6	229.5	270.1	208.6
91.4	91.8	101.3	87.5	91.2	91.6	124.4	128.8	92.6	131.5	181.9	116.7	159.3	199.5	163.4	143.3	138.1	130.2	151.6	138.5	133.4	230.4	276.6	276.4	193.6	246.7	256.7	246.4	299.6	217.4
106.5	108.5	91.7	93.8	90.6	102	121.5	132.6	91.2	146.7	192.5	121.6	156.6	220.4	161.4	150.2	140.6	126.8	148.7	148.5	118.9	193.4	290.3	270.5	191.5	289.5	251.5	229.6	208.5	208.1
115.1	119.8	72.4	99.1	109.7	106.4	128.7	155.6	96.5	148.1	199.4	108.4	178.2	190.8	168.5	121.2	136.2	121.5	132.6	140.2	121.6	198.6	228.5	256.4	209.5	288.5	216.6	218.5	271.5	232.6
112.3	127.6	70.3	104.7	116.8	107.1	132.6	158.6	115.8	145.4	186.7	115.6	165.3	199.5	163.4	108.6	138.7	120.5	130.7	142.5	134.2	191.5	239.5	278.5	223.4	233.1	238.5	298.9	216.6	219.7
108.6	121.4	73.1	116.1	118.5	108.4	122.1	159.1	128.7	173.8	188.5	118.5	168.9	190.3	160.2	117.4	140.5	118.1	140.5	139.6	148.5	213.6	240.6	271.5	219.5	280.4	236.3	217.5	239.5	276.4
96.7	139.4	96.2	118.5	129.5	110.6	108.1	156.4	149.5	156.8	186.5	124.6	156.4	118.5	145.8	121.1	160.3	125.8	134.6	131.6	141.6	220.4	218.6	209.6	236.4	228.4	208.5	218.6	218.8	238.4
91.3	138.7	91.3	116.6	122.5	108.5	117.4	158.6	150.1	170.5	193.2	132.5	159.5	170.5	121.6	103.6	166.5	130.6	133.8	140.2	130.1	215.6	230.7	216.5	199.5	251.8	212.6	238.5	199.6	244.8
128.6	136.3	115.6	121.7	128.5	123.1	113.6	170.5	157.9	174.6	191.4	121.8	167.3	175.6	123.5	123.4	139.5	139.4	145.3	145.5	138.7	290.4	271.4	209.6	198.8	256.7	234.4	277.4	271.5	218.6
131.4	115.8	141.7	128.4	134.7	108.2	137.3	105.7	163.6	177.1	198.6	132.4	158.4	189.3	136.5	130.4	143.6	128.5	160.3	148.3	133.6	223.5	288.3	279.5	173.6	251.4	223.8	280.6	287.9	232.8
115.6	129.6	146.5	104.1	131.8	101.6	138.8	119.5	168.7	182.6	195.4	119.6	155.4	180.3	148.5	118.5	168.6	121.8	152.4	130.1	137.1	209.5	236.4	256.5	188.4	254.4	226.6	296.4	291.2	276.7
71.5	195.2	140.3	93.3	121.6	115.4	121.7	153.6	166.1	139.5	193.2	129.5	159.3	188.4	139.5	150.2	150.4	130.4	155.3	146.8	150.6	217.5	221.5	271.4	190.2	216.5	231.9	209.7	299.4	266.3
70.3	188.1	171.2	98.2	120.4	98.6	122.1	158.6	108.6	148.2	199.4	139.7	160.4	190.5	140.5	118.9	151.4	139.6	158.2	140.2	144.8	290.4	207.4	266.2	165.3	236.8	218.5	221.6	290.2	218.9
90.6	186.4	139.3	96.2	130.2	104.6	127.5	153.4	117.5	155.6	191.5	145.6	148.2	207.1	150.6	125.2	193.6	134.6	149.5	139.2	147.1	213.5	277.4	232.6	178.5	248.6	254.3	232.6	299.4	215.4
91.2	194.7	131.5	104.6	115.6	101.2	128.3	118.6	118.1	158.7	118.6	141.4	156.9	198.7	149.5	121.6	191.4	139.6	150.4	138.5	139.5	240.4	208.2	231.8	198.6	253.9	221.8	290.4	282.1	221.8
73.4	176.2	127.1	108.1	102.8	106.1	121.5	128.9	120.4	176.1	186.7	139.5	163.4	191.5	141.6	109.5	176.2	145.3	151.4	144.3	132.6	209.5	271.6	267.6	218.9	251.9	291.8	228.6	248.5	233
78.2	171.5	118.2	115.6	111.1	104.7	74.2	132.6	126.7	178.3	181.3	131.7	161.6	190.4	139.2	130.4	180.3	129.7	152.2	142.2	131.5	199.5	236.2	248.3	226.4	258.7	274.3	217.5	288.4	229.7
108.6	188.6	121.6	109.1	180.3	112.6	63.7	137.5	118.6	118.7	188.5	134.5	159.2	118.6	180.6	128.6	154.1	127.3	158.4	140.5	140.7	167.4	209.5	236.9	208.6	299.5	216.8	290.6	276.2	233.4
115.4	198.2	113.1	117.1	115.6	99.5	44.8	144.8	145.6	157.6	188.5	149.6	158.6	170.5	116.5	121.5	150.4	121.4	148.2	137.4	148.2	189.5	218.6	229.3	217.2	234.8	219.5	199.5	279.7	218.6
126.3	191.5	134.6	108.6	102.3	98.1	92.5	152.3	150.1	193.4	175.6	145.1	162.3	220.3	121.4	109.5	180.6	120.8	143.1	138.5	118.5	188.5	230.4	278.5	279.4	231.9	278.6	198.7	236.9	277.4
111.5	177.3	124.2	123.4	99.5	93.6	115.7	158.6	158.6	192.5	177.1	148.6	166.5	208.6	120.6	119.5	161.7	137.4	139.3	131.3	133.7	145.8	228.5	266.4	219.5	218.6	271.5	206.4	299.1	280.3
108.4	171.4	121.7	121.8	108.5	104.2	118.1	159.7	151.9	198.4	170.5	146.5	169.4	201.4	115.4	108.4	178.4	131.8	138.6	129.5	140.8	203.6	236.2	218.5	213.5	219.5	268.5	215.8	280.7	299.5
120.3	112.6	130.1	130.6	101.3	101.3	123.6	163.7	163.2	196.6	175.6	139.5	150.4	198.5	130.2	123.4	188.5	140.5	131.4	125.9	150.4	274.3	271.5	211.1	218.5	223.8	261.9	239.5	299.4	216.8
99.2	186.2	132.6	98.2	99.5	90.7	121.8	161.2	168.4	182.5	192.5	140.6	142.6	118.6	126.8	128.6	190.4	137.5	148.6	142.5	151.8	280.5	228.7	218.6	215.6	245.8	273.4	244.6	215.7	230.4
98.6	181.5	121.7	83.1	98.3	103.1	130.6	108.6	115.6	188.4	192.1	145.6	141.5	180.4	159.6	106.5	199.6	133.3	141.4	144.2	155.7	228.5	236.1	213.5	229.8	256.9	271.9	286.4	299.6	221.9
112.5	193.6	109.4	88.6	93.6	100.1	137.4	117.1	123.8	193.6	190.5	141.6	148.7	176.2	170.4	130.2	163.4	139.5	148.6	136.4	149.2	195.6	215.6	208.5	230.4	251.5	218.6	285.6	291.5	276.2
115.8	191.2	96.8	87.2	98.7	104.3	128.6	118.5	121.5	191.4	188.6	193.2	139.6	179.5	161.8	128.5	190.5	140.5	160.3	139.1	140.3	191.4	209.5	219.2	219.5	258.9	230.4	219.6	288.4	255.1
97.6	178.6	91.6	98.7	105.1	90.1	131.7	145.7	123.1	199.2	181.3	177.3	140.1	171.8	160.3	122.4	180.5	145.8	136.4	142.3	150.6	156.7	232.6	193.3	237.7	231.9	221.6	217.7	279.2	199.1
91.4	177.5	99.3	91.5	108.6	73.4	133.9	148.7	108.6	118.4	149.1	161.8	139.5	163.4	152.1	109.5	187.5	178.4	131.5	150.3	151.6	198.2	215.4	187.6	248.1	218.6	272.8	286.4	263.3	197.4
93.6	190.6	110.6	94.3	90.4	106.2	108.7	141.5	115.1	167.1	108.6	154.1	131.5	190.2	190.4	130.2	189.4	116.4	140.5	139.5	156.6	199.5	220.4	181.9	276.5	276.5	218.5	213.6	278.6	213.5
108.2	199.4	115.4	92.8	110.1	101.5	127.6	139.6	121.6	172.5	119.7	118.6	140.8	199.6	115.1	123.1	140.5	180.5	141.5	143.3	144.2	206.5	198.5	209.4	271.6	218.5	222.4	199.1	271.9	226.6
116.9	188.4	134.9	91.7	99.5	108.1	121.4	145.1	109.4	174.3	140.5	123.6	147.6	206.5	130.5	140.3	159.6	116.4	138.2	118.9	172.2	209.5	109.3	217.5	278.5	298.5	236.4	109.5	263.7	221.6
115.7	175.1	131.6	90.4	94.8	115.1	108.1	108.6	110.6	171.4	188.6	138.6	150.2	208.1	131.8	118.4	173.2	140.2	133.5	120.2	139.2	199.6	237.4	221.5	271.5	251.6	298.1	213.4	209.8	230.4
123,8	196,2	138,7				115,1	107,6	121,7
86,1	199,4	127,2				100,3	131,6	118,6
80,4	99,7	130,8				108,6	156,5	115,4
104,3	102,6	127,2				98,7	158,7	156,7
110,2	115,4	136,4				91,6	163,1	151,8
96,3	190,3	138,9				103,5	159,7	149,7
91,2	113,6	141,5				107,4	151,6	140,2
93,6	108,1	119,7				101,3	170,1	136,7
98,7	123,6	120,8				126,8	183,6	131,8
95,4	121,5	115,7				131,6	188,2	143,9
96,3	199,5	118,2				104,7	193,7	145,4
98,2	175,2	136,5				116,5	191,1	118,6
105,1	169,3	131,8				115,1	135,7	119,6
106,6	170,1	121,6				118,6	133,6	109,7
112,1	165,9	108,6				107,1	121,8	118,5
86,3	154,8	116,3				116,7	118,5	156,2
88,9	112,6	112,2				99,6	137,4	145,6
93,6	96,4	109,6				95,8	138,1	148,1
91,4	91,8	101,3				106,7	115,6	170,5
106,5	108,5	91,7				119,1	127,5	110,4
115,1	119,8	72,4				124,4	128,8	92,6
112,3	127,6	70,3				121,5	132,6	91,2
108,6	121,4	73,1				128,7	155,6	96,5
96,7	139,4	96,2				132,6	158,6	115,8
91,3	138,7	91,3				122,1	159,1	128,7
128,6	136,3	115,6				108,1	156,4	149,5
131,4	115,8	141,7				117,4	158,6	150,1
115,6	129,6	146,5				113,6	170,5	157,9
71,5	195,2	140,3				137,3	105,7	163,6
70,3	188,1	171,2				138,8	119,5	168,7
90,6	186,4	139,3				121,7	153,6	166,1
91,2	194,7	131,5				122,1	158,6	108,6
73,4	176,2	127,1				127,5	153,4	117,5
78,2	171,5	118,2				128,3	118,6	118,1
108,6	188,6	121,6				121,5	128,9	120,4
115,4	198,2	113,1				74,2	132,6	126,7
126,3	191,5	134,6				63,7	137,5	118,6
111,5	177,3	124,2				44,8	144,8	145,6
108,4	171,4	121,7				92,5	152,3	150,1
120,3	112,6	130,1				115,7	158,6	158,6
98,6	108,5	129,6				118,1	159,7	151,9
99,7	121,7	121,8				123,6	163,7	163,2
86,3	138,6	115,6				121,8	161,2	168,4
81,9	148,9	109,1				130,6	108,6	115,6
104,9	191,2	112,8				137,4	117,1	123,8
116,7	196,8	122,3				128,6	118,5	121,5
96,8	184,3	106,1				131,7	145,7	123,1
99,5	186,6	92,6				133,9	148,7	108,6
112,3	174,5	99,8				108,7	141,5	115,1
115,9	178,2	127,9				127,6	139,6	121,6
						121,4	145,1	109,4
						108,1	108,6	110,6

## Sheet: Figure 4 supplement 1
A
	strain 1/148
		Non-Infected			Infected
		1	2	3	1	2	3
	Extravascular CD45+	264000	153000	290000	512000	569000	966000
	Intravascular CD45+	20000	20100	87000	192000	178000	300000
	strain IL3000
		Non-Infected			Infected
		1	2	3	1	2	3
	Extravascular	17000	31100		25200	17800	78700
	Intravascular	454	825		1630	4190	10300
B
	strain 1/148
		Non-infected	Infected
	Myeloid cells	50000	70000
	Monocytes	20000	40000
	Neutrophils	4000	3000
	Non-myeloid	80000	80000
C
	strain 1/148
		Non-Infected			Infected
		1	2	3	1	2	3
	DC (CD11b+CD11c+)	4159	2940	2337	3656	2539	3843
	Monocytes (CD11b+Ly6C+)	4159	2940	2476	4290	2728	4316
	Macrophages (CD11b+F4/80+)	1764	2052	1615	2554	2080	3058

## Sheet: Figure 5 supplement 1
	BSA	rICAM1	rCD36
	383.249	281.049	421.574
	242.725	114.975	396.024
	447.124	613.199	536.549
	664.299	536.549	1711.85
	983.673	396.024	740.949
	1226.4	293.824	255.5
	779.274	306.599	613.199
	447.124	1047.55	293.824
	536.549	702.624	651.524
	881.473	1060.32	677.074
	855.923	319.374	523.774
	779.274	255.5	485.449
	817.598	408.799	792.049
	958.123	370.474	638.749
	536.549	498.224	472.674

## Sheet: Figure 6 supplement 1
A
			Days Post-infection
		mouse #	1	2	3	4	5	6	7	8	9	10
	Clodronate Liposomes	1	0	0	0	*	*	*	*	*	*	*
		2	0	0	0	18750000	48000000	66000000	*	*	*	*
		3	0	0	0	33750000	67500000	75000000	*	*	*	*
		4	0	0	0	36000000	110250000	98250000	*	*	*	*
	PBS Liposomes	1	0	0	0	4500000	18000000	87750000	*	*	*	*
		2	0	0	0	2250000	6000000	87000000	117750000	*	*	*
		3	0	0	0	5250000	22500000	72750000	105000000	*	*	*
		4	0	0	0	4500000	21750000	33750000	165000000	218250000	*	*
	PBS only	1	0	0	375000	9750000	30000000	66750000	191250000	46500000	*	*
		2	0	0	0	750000	4500000	36000000	0	18750000	23250000	*
		3	0	0	0	4500000	21000000	22500000	285750000	*	*	*
		4	0	0	0	25500000	25500000	75750000	166500000	*	*	*
B
		Clodronate Liposome		PBS Liposome		PBS only
	Days post-infection	# mice alive	% mice alive	# mice alive	% mice alive	# mice alive	% mice alive
	1	3	1	4	1	4	1
	2	3	1	4	1	4	1
	3	3	1	4	1	4	1
	4	3	1	4	1	4	1
	5	3	1	4	1	4	1
	6	1	0.333333	3	0.75	4	1
	7	0	0	1	0.25	3	0.75
	8	0	0	0	0	1	0.25
	9	0	0	0	0	1	0.25
	10	0	0	0	0	0	0
