# Supplementary material for: Immunopathology and Trypanosoma congolense parasite sequestration cause acute cerebral trypanosomiasis
Source: eLife. 2022 Jul 5;11:e77440. doi: 10.7554/eLife.77440 (PMC9307270; doi:10.7554/eLife.77440)
Supplement: Supplementary file 1. [file elife-77440-supp1.xlsx]

## Sheet: Sequencing Statistics
Sample ID	Number of Reads	Sum of Read Lengths	Minimum Read Length	Average Read Length	Maximum Read Length
IB1	12099257	915729597	35	75.7	76
IB2	10813135	818587010	35	75.7	76
IB3	13070406	989024524	63	75.7	76
IB4	13169127	996754931	63	75.7	76
NB1	11699258	885403850	38	75.7	76
NB2	6227482	471275049	35	75.7	76
NB3	11853905	897008144	54	75.7	76
NB4	12798071	968676519	45	75.7	76
NB5	13780240	1043691980	35	75.7	76

## Sheet: Normalised-CPMs
Transcript ID	IB1	IB2	IB3	IB4	NB1	NB2	NB3	NB4	NB5
rna-XM_030249898.2	8.41013	7.65865	7.06969	8.12023	6.98684	8.34605	8.43657	7.22522	7.5239
rna-XM_006533549.4	5.48108	5.87964	5.9197	5.60957	5.88466	5.30469	5.4019	5.36761	5.99347
rna-NM_177577.3	5.67024	5.45832	4.66624	4.5613	5.57671	5.42029	5.5666	5.6941	5.75155
rna-NM_201354.2	8.34656	8.49183	8.41319	7.89261	8.41013	7.86233	8.36677	8.00997	8.08006
gene-Gm3379	10.7593	10.9069	10.6107	10.9303	10.43	10.4949	10.5038	10.0592	10.2239
gene-Gm3375	9.80642	10.145	9.65788	9.57795	9.32137	9.22541	9.2638	9.01724	9.52562
rna-XM_036153497.1	7.46797	7.53419	7.55525	7.40851	7.07156	7.0951	6.73324	7.24461	7.18504
rna-XM_006527758.5	5.5098	6.73001	5.68273	6.3405	7.75608	7.53551	6.79871	6.2763	4.80388
rna-XM_030253763.2	6.28912	6.20157	6.49508	3.17337	6.4657	3.17337	6.36563	5.80537	5.69145
rna-NM_053262.3	9.7294	9.81921	9.64184	9.75545	9.81822	9.91335	9.91147	9.29489	10.3845
rna-XM_036157108.1	6.90613	7.34944	7.11282	6.47963	6.64918	6.48098	7.02504	6.76924	6.52109
rna-NM_001111314.1	7.70144	8.4739	8.37487	8.66973	8.85034	8.67463	8.63367	9.20157	8.45846
rna-NR_033782.1	4.46738	3.17337	5.06483	5.22905	5.6791	5.17779	5.21359	5.75087	5.596
rna-NM_025934.2	7.11887	6.32832	6.77934	7.08239	6.91728	6.86065	6.67628	7.04886	6.61916
gene-Gm6474	6.09958	6.36816	6.20486	5.7156	5.57671	5.47449	5.4591	5.50792	5.21698
gene-Gm6475	7.02608	6.40689	6.57166	7.13908	7.54246	7.473	7.76256	6.92194	8.58016
gene-Gm6477	6.64352	6.76011	6.32822	6.86413	6.33378	6.45513	6.21286	6.36837	8.08006
rna-NM_013812.2	8.77924	8.67562	8.82589	8.66011	9.35166	9.41316	9.2308	9.03953	9.03824
rna-XM_006512783.5	8.34273	8.69122	8.24567	8.07749	8.77128	8.72903	8.97822	8.49483	9.16703
rna-XM_036158895.1	7.31973	6.32832	3.17337	7.22884	5.10166	5.71676	3.17337	6.53623	7.29733
rna-NM_013835.2	9.16889	7.75843	8.08658	8.68561	9.44067	9.25536	9.44398	9.1176	9.48752
rna-NM_019707.5	3.17337	7.20432	8.02939	7.90353	7.70998	8.13654	6.02297	7.44219	7.50704
rna-XM_006503461.4	6.18892	3.17337	5.72898	3.17337	5.7743	6.42881	6.16358	6.17776	3.17337
rna-XR_004941797.1	7.15436	7.92621	8.19056	8.13419	8.01015	7.20704	8.1133	4.76279	7.00417
rna-NM_001252573.1	8.21871	7.75099	4.49518	8.04828	8.17608	3.17337	8.47688	4.56584	8.1359
rna-NM_025550.3	8.6582	9.32955	9.05901	9.11195	8.5042	8.76071	8.46691	8.6766	8.86413
gene-Gm5920	6.82018	7.20432	7.01615	7.07272	6.75572	7.02697	6.81988	6.58293	6.63486
rna-XM_036159678.1	6.23992	6.38766	5.99666	5.7156	6.1361	6.1667	5.4591	5.40411	5.34258
rna-XM_006497146.5	7.32752	7.72846	7.4651	7.67404	7.91689	7.86233	7.49414	7.84232	7.33607
rna-XM_036166029.1	8.22288	8.78145	8.70476	7.97255	8.48724	8.49164	8.75061	8.67304	8.91287
rna-NM_001301671.1	8.27203	11.4733	10.9881	10.7698	10.7755	7.04431	10.9621	10.4279	3.17337
rna-XM_006520377.3	5.53791	4.27823	6.15565	4.89371	5.49446	6.42881	7.06098	4.76279	5.34258
rna-NM_021432.2	10.2128	10.696	10.8091	10.5288	10.3194	10.3199	10.3541	10.286	9.81086
rna-NM_001013365.2	6.06217	7.93934	6.88283	7.12979	5.27997	5.2428	5.4591	4.93092	4.60262
rna-NM_175451.1	9.64026	8.88682	8.97769	9.02972	8.28613	8.38723	8.47024	8.0654	8.52269
rna-XM_011238772.3	5.48108	5.16047	4.81451	5.11358	5.176	5.71676	4.99267	6.00403	5.12586
rna-NM_027395.2	12.3379	12.565	12.4847	12.6219	12.4279	12.6183	12.5765	12.1684	13.2429
rna-NM_175526.3	6.78656	6.55202	5.50709	6.16782	6.52059	6.06716	6.3065	5.29141	5.75155
rna-NM_030263.5	8.24356	8.25511	9.5401	8.58756	9.02266	8.61232	8.95938	9.1176	3.17337
rna-NM_172462.4	5.29432	4.62958	4.94611	4.34724	5.43665	6.1343	5.14416	5.60423	3.17337
rna-NM_001293652.1	10.9213	10.4035	11.5138	10.9749	10.8059	10.6857	10.6817	10.385	10.5017
rna-NR_126043.2	9.16456	9.21822	9.56041	9.3696	9.38683	8.7917	9.36388	9.46104	9.20926
rna-NM_175324.4	6.15387	4.62958	5.39528	5.76566	6.81164	6.62685	6.91144	6.23771	6.06553
rna-NM_027194.3	8.23533	8.26557	8.53192	8.28369	8.1971	8.30365	8.263	8.09767	8.22098
rna-XM_011242692.3	6.68065	6.2235	6.66773	7.55436	6.87596	6.06716	7.21241	7.76402	6.52109
rna-NM_008929.3	10.1108	9.90196	9.78679	9.86968	9.74736	9.89444	9.94537	9.60815	10.3718
rna-XM_030251342.1	5.74385	6.06218	6.12186	5.30063	5.27997	3.17337	4.72283	6.88527	5.66038
rna-XR_003950507.2	5.15302	5.37992	5.50709	7.24614	6.82256	6.10114	6.26046	7.7163	6.43384
rna-XR_003956387.2	5.71975	3.17337	4.94611	5.68986	5.40678	4.95986	5.21359	5.29141	5.21698
rna-XM_036163245.1	4.39761	5.20745	4.55526	5.79002	6.43743	6.64977	6.26046	6.6429	5.17224
gene-CYTB	11.6687	12.3951	12.1564	13.8564	11.9408	11.684	12.2003	12.3776	12.4491
rna-NM_198250.1	9.00667	9.27884	9.13599	8.56712	8.87663	8.73436	9.22095	8.72557	8.51007
rna-NM_139272.2	8.38057	6.60282	7.28099	7.71182	8.23825	8.44689	8.43657	8.19034	8.64315
gene-Rpl36-ps12	8.5328	8.78145	8.93763	8.95305	8.36255	8.38723	8.30093	7.98143	8.27669
rna-NM_025790.2	8.96246	8.60736	8.38191	8.44549	8.75437	8.66908	8.82274	8.50688	9.61078
rna-NM_025701.4	7.65274	7.58527	7.18732	7.62868	8.2137	8.12847	8.04341	7.58577	8.08574
rna-NM_019919.4	4.76065	5.20745	4.86001	4.68323	4.98115	5.17779	4.81978	5.50792	5.596
rna-NM_001164805.1	6.20613	7.04281	7.0871	7.3853	6.74427	6.1343	7.18012	7.47536	6.68096
rna-XM_017315469.3	3.17337	6.1102	6.50814	3.17337	6.62438	6.40198	9.06669	7.01535	8.48019
rna-NM_027541.5	7.73106	7.81656	7.33293	7.60879	7.43312	7.35314	7.52656	3.99763	8.09704
rna-NM_001355166.1	6.23992	6.46307	6.48191	6.89743	6.72109	7.04431	6.88157	6.72836	5.52838
rna-NM_011340.3	4.90601	5.56786	5.53363	5.97075	6.75572	6.88012	6.60477	6.58293	6.97987
rna-XM_036157697.1	3.17337	6.38766	3.17337	5.79002	6.56041	3.17337	5.78105	6.96941	3.17337
rna-XM_030255115.1	8.14147	8.17966	8.02038	8.1753	7.4751	7.46017	7.52656	6.71447	7.39229
rna-NM_001364505.1	6.96736	6.94161	7.28853	7.32149	7.16873	7.35314	7.17193	7.66694	7.42858
rna-XM_030248662.2	4.53271	3.17337	4.3634	4.94095	4.84747	3.17337	4.6711	5.5408	4.97545
rna-NM_001358931.1	6.06217	7.76582	7.94148	8.13882	8.29005	6.25961	8.11756	8.46629	5.56261
rna-XM_036164036.1	4.99395	5.76335	3.17337	3.17337	6.23842	5.10927	6.39429	3.17337	5.72183
rna-XM_006526646.5	6.57939	6.73001	6.54659	6.73491	6.70935	6.42881	6.68786	7.03778	7.25751
rna-XM_036158702.1	7.43232	7.87243	8.81813	5.26533	7.61933	7.6973	8.49007	8.4704	7.41055
rna-XM_011250170.3	5.22561	5.45832	3.17337	5.26533	5.46587	5.03682	5.37234	3.84936	3.17337
rna-NM_016810.4	6.94725	7.64266	5.87955	6.95126	6.58634	6.25961	6.84074	6.25713	6.95514
rna-NM_009304.2	10.0499	11.0731	3.60453	10.7174	9.8504	10.2822	10.004	9.82742	10.0255
rna-XR_004935687.1	5.56544	5.37992	5.48001	4.49476	6.06347	5.88358	5.64192	5.6941	5.3819
rna-XM_030253609.1	7.74854	4.83395	8.43367	5.15325	4.79936	3.17337	4.43563	5.25156	7.84555
rna-NM_145447.2	5.26042	4.89481	4.29027	6.40404	7.71582	8.19958	4.81978	5.47421	7.79785
rna-NM_009451.4	7.83836	8.30668	8.33186	8.50401	8.43511	8.81201	8.65724	8.25851	8.33987
gene-Gm14176	9.12723	9.30948	8.91111	8.62099	8.64545	8.46624	8.44675	8.20028	8.78605
gene-Gm14173	9.33794	9.76865	9.61968	10.025	9.66381	9.43295	9.50694	9.3869	10.3902
rna-XM_006533812.5	4.70787	3.17337	3.17337	5.19171	4.52266	3.17337	4.86539	5.07849	4.44451
rna-NM_010554.4	7.02608	7.17121	6.38606	7.3853	6.20513	6.53129	6.50345	6.23771	5.02764
rna-XM_006531787.5	8.38802	5.25277	7.79602	5.03027	8.68169	8.72368	8.90381	8.75282	8.75074
rna-XR_001780794.3	7.78853	7.26832	8.37133	8.1798	8.0149	3.17337	3.17337	8.33717	3.17337
rna-XM_006507737.4	8.73321	7.27872	8.75986	8.62099	6.94751	8.93279	8.76966	8.89414	7.18504
rna-XM_006504669.4	7.62775	8.41873	8.30987	8.07266	7.76738	7.89127	8.00255	8.049	7.51549
rna-XR_877089.3	6.68065	6.48132	5.79555	5.43297	4.93822	5.67166	5.10797	5.07849	5.83701
rna-NM_145151.3	6.8638	5.29655	5.87955	7.24614	7.12538	7.57174	6.95988	6.35043	7.19562
rna-NM_177900.4	7.5699	7.53419	7.54899	7.40081	7.20248	6.75911	7.57697	7.36462	6.89138
gene-Gm18722	7.02608	7.41684	7.18732	7.34575	6.58634	6.1343	6.44992	6.90982	7.71955
rna-NM_134139.1	7.23115	7.65865	7.36891	6.77133	6.85484	6.71638	7.09605	6.53623	6.75461
rna-NM_027244.1	9.71616	10.0975	9.96142	9.85009	9.5245	9.63443	9.36567	9.3156	9.46592
gene-Gm6900	6.88513	7.66657	7.0609	7.33771	6.64918	6.37464	6.72203	6.36837	6.90436
rna-NM_153792.2	8.01723	8.27596	8.16219	7.74863	8.49405	8.1684	8.20017	8.28676	7.90465
rna-XM_011245343.4	6.78656	6.71472	6.71343	7.26323	6.8334	7.02697	7.08736	5.75087	3.17337
rna-XR_004934407.1	8.46046	4.70185	3.7809	8.88864	8.62698	8.33907	8.3986	4.49144	7.65214
rna-NM_010730.2	6.53947	5.82273	6.10465	5.7156	6.08198	5.30469	5.03231	5.88327	5.12586
rna-XM_036153274.1	9.47008	9.56998	9.13599	9.23145	9.03671	9.09067	8.96883	8.67304	9.22478
rna-NM_001368622.1	5.5098	4.55224	5.58519	7.00313	4.38845	6.8209	5.31115	4.7009	4.44451
rna-NM_009673.2	11.3441	10.4177	10.4015	11.4704	10.0472	9.95501	9.73861	9.5217	9.55047
rna-NM_009344.3	9.96664	10.3627	10.0492	9.00967	7.80075	7.63018	7.70143	7.28262	7.15282
rna-XM_006521721.4	9.41284	9.56363	9.66655	9.54872	9.64253	9.65143	9.85909	9.51575	9.28772
rna-XM_006501504.5	4.53271	3.17337	4.90383	5.26533	5.176	5.76041	4.36739	7.47536	4.02049
gene-Gm3226	10.0095	9.82099	9.92934	10.2754	10.1531	10.052	9.94537	9.91142	9.8762
rna-NM_178918.3	7.36583	7.44479	7.82735	7.19361	7.05316	7.0951	7.5072	7.24461	6.79704
rna-XM_011249115.1	8.82933	7.18234	5.58519	8.15718	8.4527	8.17626	8.30839	8.07624	8.23127
rna-NM_001358568.1	7.62775	7.16001	7.1043	7.79629	7.57499	7.48572	7.49414	7.21542	7.58945
rna-NM_008980.2	9.38893	8.2914	8.88904	9.02224	9.6053	9.56737	9.56883	9.52565	9.99561
rna-NM_153421.2	3.17337	7.39791	3.17337	7.49055	8.15904	8.23009	8.4021	3.17337	3.17337
rna-XR_386687.4	4.24116	4.37817	3.17337	5.5817	4.31393	5.52657	5.21359	5.12402	5.07771
rna-XM_006513522.5	8.44982	8.50514	3.17337	3.17337	8.38836	8.0957	3.17337	3.17337	9.41946
rna-XR_003955596.2	5.53791	5.66913	5.95872	6.14932	5.70353	6.34675	5.96635	6.59817	5.83701
gene-Gm18588	5.42173	5.06093	5.17321	5.03027	5.94687	6.03234	5.4868	5.03124	6.57097
rna-XM_036158681.1	6.04309	6.30797	6.58403	6.63297	6.61181	6.67232	7.14708	7.29196	6.26174
rna-NR_153807.1	8.4988	7.79503	7.764	8.0871	8.35882	8.34605	8.5574	6.75574	8.78605
rna-XM_036160568.1	5.39102	6.0864	6.44162	6.55139	6.69752	6.73791	5.54052	7.05986	6.75461
rna-NM_023211.5	9.8502	10.3639	9.07864	9.89038	9.8046	8.60652	8.59451	9.578	9.63228
rna-NM_008151.3	5.32735	5.60247	5.33561	5.76566	5.81951	5.47449	5.78105	5.85779	6.08874
rna-NM_178760.4	3.17337	3.17337	6.3429	5.40111	4.8937	3.17337	6.21286	7.45055	6.57097
rna-NM_028351.3	4.99395	5.06093	5.30472	5.07262	5.75111	4.78948	5.24693	5.60423	5.96859
rna-NM_201358.2	7.73691	8.19616	7.49144	7.05318	7.77859	7.74037	7.92205	7.29196	7.93015
gene-Gm7266	5.6448	5.49584	5.75153	5.60957	5.10166	5.2428	5.07071	4.93092	5.34258
rna-XR_004940198.1	4.05162	3.17337	7.36178	4.84453	7.6005	4.95986	4.29404	4.98211	3.17337
rna-XM_030254804.2	7.6403	7.19337	8.07358	8.21527	7.68039	8.42068	8.30093	8.71521	7.65979
rna-NM_026468.2	8.95997	9.12368	8.8816	8.80386	8.73439	9.04424	8.95225	8.45803	8.9507
rna-XM_011239411.2	8.60807	8.12324	8.23014	8.41531	8.40652	8.35299	8.54166	8.43718	8.45846
rna-XM_006520352.5	7.79975	8.44658	8.29128	5.33499	7.86526	7.72972	7.89253	7.52372	6.11157
rna-NM_010050.4	7.13673	8.30161	8.51601	7.48329	8.04305	7.68633	8.20417	8.80257	8.49307
rna-XM_036157957.1	5.74385	3.17337	3.17337	6.57911	6.39393	6.19836	6.72203	3.17337	6.32147
rna-XM_006520943.5	4.46738	5.70126	5.97782	5.52418	5.6791	3.17337	5.4019	6.38608	5.3819
rna-NM_007903.5	4.59426	5.73266	4.55526	5.11358	8.68466	8.45982	8.50639	7.98718	8.98757
rna-NR_169007.1	6.30514	5.60247	5.30472	3.62751	5.10166	5.10927	5.10797	3.17337	5.86435
rna-XR_004939058.1	4.70787	5.16047	3.17337	3.17337	4.98115	4.78948	5.14416	3.17337	5.07771
rna-NM_030210.2	6.18892	6.60282	6.42794	6.01246	6.31832	6.42881	6.42238	6.31385	5.45716
rna-NM_022883.3	6.59245	7.24731	6.57166	6.44988	4.58382	4.58973	3.17337	4.56584	3.17337
rna-XM_011243373.1	6.33665	6.49932	6.13886	6.22189	6.85484	6.84091	6.78801	6.90982	6.82463
rna-NM_026181.1	7.08247	6.15663	6.77934	6.59277	6.8334	7.00942	6.90155	6.84763	7.58945
rna-NM_028722.3	6.25651	6.6357	5.81703	6.63297	6.06347	5.88358	6.96937	5.50792	7.72684
rna-XM_036155004.1	5.9435	7.44479	3.17337	3.17337	7.8117	6.91827	3.17337	4.76279	3.17337
rna-XR_004940133.1	5.15302	5.00801	4.94611	5.11358	5.81951	5.47449	6.14676	5.88327	5.94326
rna-NM_134164.5	5.32735	4.95273	5.72898	4.94095	5.75111	5.10927	5.98548	5.07849	5.3819
rna-NM_010423.2	7.17179	8.42807	7.61035	7.2025	8.60199	8.58898	8.6097	8.05996	8.37741
gene-Gm9247	4.90601	5.00801	4.66624	5.15325	4.23305	4.58973	4.29404	4.82154	4.35533
rna-XM_036159646.1	6.09958	5.63621	5.55966	6.13057	4.79936	7.52322	4.86539	7.49166	7.11986
rna-NM_001177845.1	6.70488	7.80224	6.42794	5.68986	6.15368	7.46017	6.04135	6.75574	5.99347
rna-NM_133940.3	8.50908	7.87926	8.11646	7.83674	8.20127	7.87204	8.16358	7.66694	7.74133
rna-NM_001358970.1	5.79079	4.70185	3.17337	5.81396	5.81951	5.30469	3.17337	5.80537	3.17337
rna-NM_001373959.1	8.2019	8.4046	8.27624	9.37157	8.9101	8.52891	6.76635	8.33717	7.94898
rna-NM_001081355.3	7.34297	6.91515	7.2658	7.51214	7.63793	7.87204	7.69574	7.81021	8.20018
gene-Gm6292	6.32099	6.42587	6.3429	6.64612	6.58634	6.53129	6.39429	6.82198	7.76987
rna-XR_001783172.2	5.53791	6.26637	3.17337	5.8606	7.98619	3.17337	3.17337	7.38222	7.91745
rna-NM_016851.2	5.53791	5.37992	4.43143	4.73954	6.31832	6.53129	5.8665	4.56584	5.34258
rna-NM_144877.1	4.90601	3.17337	4.98697	3.17337	3.17337	5.71676	4.99267	5.47421	5.56261
rna-XM_036153502.1	7.74854	5.00801	7.0871	7.46126	7.40443	7.66413	5.17935	7.74376	6.91723
rna-NM_173391.3	5.22561	3.17337	4.21093	5.66362	4.8937	3.17337	5.37234	4.76279	4.97545
gene-Gm8116	6.8638	5.37992	5.79555	6.35665	6.74427	6.42881	6.8916	6.61324	6.57097
rna-NM_026370.2	7.05455	6.60282	5.77372	7.05318	7.12538	7.26728	6.9788	7.10302	7.45521
rna-NM_025313.2	10.4375	10.0694	10.1245	10.4266	9.93411	10.3635	9.55164	10.0414	10.3305
rna-NM_001374000.1	5.59241	3.17337	4.81451	5.19171	4.74919	5.2428	6.02297	5.63485	5.94326
rna-XR_870463.3	4.81112	3.17337	4.86001	3.17337	5.54985	5.42029	3.17337	4.82154	5.72183
rna-XM_006525081.4	7.82744	8.24457	8.3571	7.06298	7.24359	6.75911	7.28251	6.68628	7.05158
rna-XM_006500406.4	5.35957	5.60247	5.102	4.73954	5.176	4.78948	5.43081	6.42085	5.45716
rna-NM_001205361.1	8.11027	5.37992	5.30472	5.60957	5.46587	5.2428	8.04341	5.50792	4.86385
rna-NM_018861.3	8.00759	7.28904	7.55525	7.47598	7.20248	7.52322	7.60759	7.75055	7.26756
rna-NM_001033496.3	6.20613	5.4197	5.72898	5.46408	6.25477	5.62501	6.61695	6.40358	5.99347
rna-XM_030255601.1	5.15302	5.76335	6.83202	6.16782	6.37913	6.55579	5.96635	6.92194	6.22045
rna-NM_146032.3	8.84294	9.07397	8.59086	8.72304	8.71703	8.82705	8.69759	8.40747	8.73997
rna-XM_006497216.5	7.36583	7.12585	5.20737	6.88642	5.84157	7.49833	6.69934	7.67409	7.21655
rna-XM_006517569.3	8.46399	8.45575	8.27624	8.63415	8.05692	8.15256	8.17995	8.36394	8.94134
rna-NM_198108.2	3.17337	3.17337	6.23673	6.2041	6.53399	6.45513	6.32152	6.23771	3.17337
rna-NM_026821.5	6.51222	6.36816	6.64431	5.49447	6.02568	6.67232	6.76635	6.2952	6.35993
rna-XM_006500062.2	5.69522	6.36816	5.83819	7.36961	5.62888	6.95543	5.8665	6.43793	6.24125
rna-XM_006498011.4	7.37337	8.30161	8.25337	7.83674	7.92699	8.37364	7.80544	7.95231	9.06723
rna-XM_006497070.5	9.45775	9.02864	8.77063	9.46102	9.05984	9.28107	8.97822	8.91239	9.29998
rna-NM_001355426.1	3.17337	8.42341	8.07358	8.43425	8.63317	8.50417	8.71455	8.35061	8.38203
rna-NM_146057.3	8.70963	8.61965	8.40975	8.51116	9.35166	9.17537	9.15626	8.77957	9.01462
rna-XM_036157514.1	4.05162	5.29655	4.90383	4.5613	4.74919	4.78948	3.17337	5.88327	3.17337
rna-XM_006512916.5	4.76065	5.06093	4.55526	5.15325	4.58382	4.78948	5.07071	5.25156	4.44451
rna-NM_001174155.1	3.17337	3.17337	3.91476	4.07087	5.13938	5.57669	4.99267	4.7009	5.42006
rna-XM_006498091.4	5.71975	6.15663	6.15565	6.23946	6.25477	6.03234	6.44992	6.42085	5.78063
rna-NR_169308.1	6.42716	6.26637	6.46861	6.65915	7.10766	6.60356	7.07862	6.55197	6.43384
rna-NM_025931.3	7.06392	6.56915	6.69076	6.61969	6.80063	6.48098	6.67628	6.70044	6.46939
rna-NM_001004149.1	4.81112	3.17337	4.61215	4.07087	4.8937	4.47435	4.99267	4.98211	5.86435
rna-XM_011243332.3	3.17337	5.53233	4.55526	4.62395	4.6417	4.78948	5.07071	5.03124	4.67376
rna-NM_008239.4	10.6002	11.3023	10.4592	10.931	11.4441	11.4213	11.1204	10.0742	10.6679
rna-NM_001042451.2	8.76501	8.87321	8.92322	8.75049	9.19965	9.74148	9.07765	8.89414	9.0499
rna-NM_027430.3	9.19459	8.76311	9.06777	8.83268	9.1488	8.77629	9.17679	9.03399	8.91606
rna-XM_011247115.3	3.17337	6.15663	5.9197	5.79002	6.42308	6.28926	6.05948	6.42085	5.52838
rna-NM_025794.2	7.03563	6.38766	6.41412	6.79511	6.69752	6.1343	6.49025	6.75574	6.46939
rna-XM_006531409.3	5.18983	3.17337	5.33561	3.17337	4.84747	5.52657	5.37234	5.33006	5.02764
rna-NM_013736.4	8.66435	8.94002	8.59086	8.78334	8.57976	8.33205	8.39159	8.41602	8.99362
rna-NM_025285.2	9.91088	9.98656	9.899	9.77488	10.3108	10.4917	10.4081	10.286	10.5862
rna-NM_001356342.1	3.17337	6.1102	5.87955	6.68485	6.37913	3.17337	6.5925	6.90982	5.56261
gene-Gm11557	5.03566	5.3389	4.55526	4.62395	4.14419	4.34441	4.12704	3.99763	5.07771
rna-NM_001025608.2	9.90441	9.73895	9.74098	9.60325	9.59742	9.59983	9.87551	9.73482	9.9512
rna-XM_017319453.3	3.17337	3.17337	5.81703	6.35665	6.15368	6.75911	3.17337	6.92194	3.17337
rna-XM_006497431.5	6.57939	6.03753	6.89278	6.63297	3.17337	6.10114	6.72203	7.14492	6.52109
rna-XM_030250695.1	3.17337	6.17928	6.08722	6.2041	6.58634	6.42881	3.17337	6.17776	6.04192
rna-NM_001146318.1	6.17151	9.66781	6.22089	9.5677	4.31393	9.72819	6.07738	9.73823	9.80398
rna-XM_036165786.1	8.36555	7.73601	7.9745	8.22835	9.16168	9.21782	9.28854	8.74606	8.98757
rna-NM_001099319.2	6.32099	5.85148	4.43143	6.01246	6.00639	6.28926	6.52947	6.52031	6.43384
rna-NM_139064.2	7.01646	7.80224	7.34743	6.87532	6.43743	6.40198	6.72203	6.42085	6.79704
rna-XM_006537654.3	5.18983	5.4197	5.50709	5.5817	4.74919	5.80271	4.55982	4.87748	6.34083
rna-XR_004939049.1	9.14712	10.0101	9.64623	9.50106	9.43714	9.22919	9.0378	7.40823	9.2222
rna-XM_011247155.3	7.52999	5.45832	7.3109	4.62395	6.40858	3.17337	6.43622	7.31964	3.17337
rna-NM_177103.4	8.18061	7.09085	7.64594	7.95166	8.09774	7.85255	8.40906	7.65975	7.45521
rna-NM_053162.2	9.04955	8.73704	8.34994	8.29617	8.63932	9.18318	8.97353	8.52281	9.7334
rna-NM_019428.3	6.25651	3.17337	5.77372	4.94095	6.4657	5.84374	6.39429	5.6941	6.15615
rna-XM_006527567.2	5.85833	5.87964	5.81703	5.55325	6.22187	5.84374	6.07738	6.6429	5.80911
rna-NM_053145.2	5.9227	5.00801	4.98697	5.11358	5.90571	5.2428	5.6899	5.63485	5.45716
rna-XR_004941413.1	5.9435	3.17337	5.65899	5.7156	6.15368	6.40198	5.75882	6.75574	5.75155
rna-NM_153545.2	5.5098	3.17337	5.06483	5.60957	5.62888	6.57988	5.82444	6.96941	5.69145
rna-XM_030251093.1	6.51222	6.36816	6.15565	6.80685	3.17337	3.17337	3.17337	5.03124	3.17337
rna-XM_006497526.5	8.08299	8.26035	8.38892	7.42378	8.10221	8.06217	7.96523	8.03795	7.46398
rna-NM_022993.3	9.43457	9.97386	9.6271	9.30115	4.74919	8.40739	8.70609	4.49144	4.25711
rna-NM_001081019.1	4.59426	4.55224	4.94611	4.84453	4.84747	5.10927	4.90933	4.82154	7.06319
rna-NM_001347445.1	8.70665	9.94325	3.7809	9.069	9.105	8.89523	9.15004	3.84936	9.4217
rna-NM_001252056.1	7.87596	6.69926	7.0609	7.28849	6.92743	7.72972	6.21286	6.19803	6.28193
rna-NR_168036.1	3.17337	3.17337	3.17337	3.17337	6.17104	5.88358	5.4019	5.6648	5.86435
rna-NM_001008425.2	7.32752	3.17337	6.48191	7.12979	6.33378	6.45513	6.67628	6.52031	6.57097
rna-NM_001083882.1	8.72147	7.95883	7.88307	5.52418	8.45967	8.56525	7.37094	7.7163	7.28747
rna-NM_009793.3	7.64653	8.67169	7.02521	7.71182	9.0826	8.84193	6.95988	6.70044	7.58945
rna-NM_011296.3	10.2243	10.5866	10.377	10.6117	10.0001	10.1085	10.02	9.7107	9.74959
rna-XM_036160510.1	6.04309	3.17337	3.17337	5.74086	5.98683	5.10927	5.10797	6.38608	5.34258
rna-NM_011284.3	7.67729	8.21248	7.80129	6.88642	7.36028	7.78218	7.35658	7.3378	7.44639
rna-NR_038082.1	4.70787	3.17337	4.43143	4.73954	4.8937	4.95986	4.95171	5.7784	4.97545
rna-NM_013625.4	6.85302	7.12585	6.73574	6.27395	6.27093	6.37464	5.82444	6.38608	8.09704
rna-XM_017316761.2	7.09166	7.69785	6.13886	7.00313	11.6674	7.36696	11.7524	5.12402	11.1323
rna-XM_006526743.5	3.17337	4.62958	5.93935	3.17337	6.22187	3.17337	6.04135	6.58293	5.83701
rna-NM_173423.4	5.26042	5.06093	5.93935	5.7156	5.37621	5.17779	4.55982	5.5408	4.97545
rna-XM_011239469.4	5.32735	5.20745	5.95872	6.25681	5.81951	6.8006	6.72203	6.62815	6.24125
rna-NM_001291892.1	6.45609	5.53233	6.10465	4.89371	4.52266	4.34441	3.78302	3.17337	4.35533
rna-XM_030252038.1	8.57908	8.58248	7.88803	3.17337	8.87663	8.84686	8.65138	8.54636	9.24268
rna-XM_006497253.5	7.00677	6.53467	7.04317	6.72256	4.69672	7.33918	7.15541	6.72836	4.44451
rna-XM_006538878.3	9.2831	8.9659	8.81032	9.08106	8.62388	8.80189	8.74237	8.94819	9.22992
rna-NR_001461.5	6.13601	5.79336	6.35744	8.19764	7.7504	6.99165	6.95988	10.0483	4.67376
gene-Gm2223	7.62775	8.26035	7.87809	6.97223	7.56855	7.22234	7.06983	7.3468	7.65214
gene-Gm2225	8.05517	8.17411	7.89789	8.03345	7.57499	7.91964	7.79484	7.30125	8.02195
rna-XM_006514046.5	7.68337	7.41684	7.33293	7.62868	8.16332	8.12034	8.23585	8.19532	8.01601
rna-NM_172762.3	6.74046	6.91515	6.64431	6.95126	7.40443	7.17594	7.42012	7.3468	6.79704
rna-NM_009049.2	7.39576	7.93934	7.34743	7.90896	7.53587	7.42096	7.5893	7.31047	7.57334
rna-NR_015459.1	7.49587	7.55142	7.79073	7.47598	7.75608	7.81276	7.98867	8.3236	7.95521
rna-XM_017316787.3	3.17337	3.17337	8.37839	8.31672	3.17337	3.17337	8.28966	7.94642	7.95521
rna-NM_023215.6	4.81112	4.95273	9.48722	9.56427	4.14419	4.01246	4.21445	9.55497	5.69145
rna-XM_006522314.5	5.07601	5.45832	5.68273	5.88335	5.96699	6.10114	5.88706	6.11512	6.30184
rna-XM_006511459.4	7.58296	6.83268	7.12129	6.59277	7.66235	7.57174	7.9462	7.49974	7.91106
rna-XR_004934316.1	4.90601	3.17337	3.17337	5.46408	6.40858	6.1667	6.27597	6.47146	5.83701
gene-Gm9169	6.47033	7.26832	7.1043	6.78327	6.15368	6.25961	6.16358	6.2952	7.18504
gene-Gm9168	4.81112	4.70185	4.3634	4.94095	4.74919	4.69402	4.55982	6.02697	3.86828
rna-NM_009713.4	8.15026	7.87926	7.06969	7.89261	8.05231	7.85255	7.99793	7.54731	7.8982
rna-XM_036163258.1	6.48443	3.17337	6.22089	6.13057	6.27093	6.42881	6.19662	6.36837	6.26174
rna-XM_036156904.1	5.29432	5.37992	5.53363	5.46408	5.60305	7.04431	5.98548	5.7784	5.72183
rna-XM_006515382.4	4.70787	4.55224	4.81451	4.4237	3.17337	4.69402	4.95171	4.82154	6.13404
rna-NM_001363362.1	4.32259	5.87964	5.50709	4.94095	4.84747	4.34441	4.61687	4.49144	5.3819
gene-Rpl7a-ps11	7.5959	7.66657	7.50443	7.6483	6.91728	7.14415	7.15541	6.55197	6.8109
rna-NM_001361534.1	11.7012	12.4099	12.404	11.8196	11.3398	11.5746	11.468	11.3868	11.2495
rna-XM_006501710.4	6.33665	6.03753	5.97782	6.61969	6.68559	7.02697	4.36739	6.82198	6.68096
rna-XR_003948323.2	6.06217	6.01243	5.87955	7.63525	7.08067	6.55579	6.19662	8.09234	4.86385
rna-NM_009061.4	10.6287	10.6989	10.5903	10.5687	11.3388	11.5378	11.5083	11.1947	11.837
rna-NM_026472.4	8.55281	8.88003	8.81032	8.04828	8.51763	7.79245	7.92205	7.82314	8.06862
rna-NM_019394.3	3.17337	3.17337	4.76718	5.49447	4.93822	5.95996	5.4019	3.17337	3.17337
rna-NM_001081549.2	9.90959	9.2528	9.6271	11.5044	8.56367	8.52891	8.24366	8.86322	8.97232
rna-XM_006504612.2	7.77722	7.54283	7.64594	7.42378	7.77299	7.94746	7.9462	7.65975	7.86552
rna-XM_011248057.4	8.4988	8.27596	8.3355	8.07266	8.29005	9.21402	8.41252	7.68122	8.30132
rna-NM_001290313.1	6.77517	7.27872	7.5173	7.05318	6.90706	6.8209	7.5072	8.00997	3.17337
rna-NM_033602.2	6.8638	6.15663	4.61215	6.47963	3.17337	8.19185	4.21445	5.29141	5.596
gene-Gm10167	6.081	7.06703	6.53389	5.66362	4.8937	4.87771	4.95171	4.82154	6.39737
gene-Gm10163	5.9842	6.48132	6.23673	6.49428	6.34906	6.06716	6.00435	5.75087	6.43384
rna-NR_166687.1	8.88038	8.4739	8.58781	8.68561	8.26637	7.96572	7.85731	7.76402	7.7341
rna-NR_154591.1	4.39761	6.26637	6.01525	6.14932	4.04487	6.8209	5.96635	6.99256	5.86435
rna-NM_001159948.2	7.51644	6.87451	7.2658	6.92997	7.09872	6.86065	7.32002	7.95231	6.41572
rna-NM_024478.2	8.47102	9.10342	9.00986	8.80386	8.78245	7.55977	8.58533	7.68122	8.64315
rna-NM_010326.3	5.1151	3.17337	4.66624	4.73954	4.6417	4.87771	5.03231	5.03124	4.97545
rna-NM_025735.3	5.32735	5.16047	6.0517	5.36847	5.13938	5.99662	5.14416	4.63543	4.74066
rna-NM_008503.5	9.85289	10.0362	10.0959	10.2837	9.37582	9.51572	9.28476	8.90025	8.78954
rna-XM_006500313.5	6.36747	6.03753	4.94611	4.68323	6.59913	4.78948	5.5666	6.80898	5.69145
rna-NR_002870.2	4.05162	4.03729	4.81451	5.55325	5.02264	5.36376	3.91733	7.36462	3.66709
rna-NM_007534.3	9.12723	8.8421	8.89643	9.55911	8.15904	8.01036	8.09182	7.83596	7.69743
rna-XM_030251004.2	5.29432	7.85173	7.32562	4.89371	4.98115	6.19836	3.17337	3.17337	3.17337
rna-NM_008055.4	6.93708	7.97167	3.17337	6.69754	6.3027	3.17337	6.32152	7.37345	7.60538
rna-XM_006534735.5	4.05162	6.20157	6.17225	7.29681	4.52266	6.1667	5.80291	6.86029	7.46398
rna-NM_026309.2	8.5395	9.04997	8.65911	8.13419	8.06151	8.47899	8.54166	8.17026	8.47154
rna-NM_020005.4	6.22312	7.56845	6.2524	6.7101	6.57343	8.25996	6.4635	8.61481	6.68096
rna-XM_036164719.1	5.9227	6.61935	6.29838	6.25681	7.10766	7.0951	6.93101	7.20556	7.06319
rna-XM_006500483.4	7.52323	7.61015	4.12379	7.56816	6.66142	6.86065	3.78302	6.96941	7.39229
rna-NM_172892.3	4.85951	5.37992	3.17337	5.46408	5.24624	4.78948	5.54052	6.02697	5.96859
rna-NM_011715.3	10.5661	10.3031	10.3441	10.0897	10.1249	10.2171	10.1962	9.77855	9.7585
rna-XM_006513909.4	6.09958	7.37872	6.13886	5.99176	5.43665	6.22932	5.75882	6.50421	8.31105
gene-Gm18157	5.9842	6.65186	6.44162	6.72256	6.17104	5.95996	6.3065	6.21801	6.50407
rna-NM_008708.2	8.14587	8.69122	8.36779	7.9411	8.36255	8.35991	8.30093	8.13442	8.65083
rna-XR_003950900.1	6.8638	6.68364	6.2524	6.89743	6.78953	6.50636	6.83035	7.52372	6.91723
rna-NM_001289550.1	8.34273	7.13732	4.66624	5.19171	4.93822	4.95986	7.6843	4.32421	5.02764
rna-NM_178212.3	6.51222	8.01574	7.56768	6.72256	6.69752	6.88012	6.71073	6.38608	7.0747
rna-NM_001242424.1	4.59426	6.13361	4.49518	4.73954	4.93822	5.03682	5.8665	5.07849	5.72183
rna-NM_026000.2	8.10124	8.9003	8.3355	7.87052	7.80624	7.87204	7.66696	7.13456	7.87868
rna-NM_029788.5	6.69281	5.53233	5.87955	6.30762	6.74427	6.22932	6.61695	6.93395	6.37878
rna-NM_001079844.2	5.79079	5.49584	5.39528	5.03027	5.31285	5.76041	5.17935	5.83183	5.21698
rna-NR_155072.1	8.08299	8.55716	8.95662	8.52535	8.7112	8.46624	8.72015	8.70479	7.7341
rna-XM_036164125.1	7.3119	7.85173	8.03387	8.18428	8.24634	8.22252	7.36378	7.45887	7.75567
rna-NM_134046.6	5.61886	3.17337	5.42413	4.98643	5.62888	5.30469	6.29132	5.50792	5.72183
rna-NM_030013.3	4.24116	4.83395	4.61215	7.15749	4.45775	7.85255	4.6711	6.82198	5.26022
rna-XM_036161957.1	5.5098	6.15663	6.23673	5.7156	5.31285	6.19836	5.59218	6.2763	6.15615
rna-XR_384520.4	8.03158	5.3389	8.62687	8.56368	8.81815	8.84193	8.88646	5.12402	5.02764
rna-NM_175259.4	6.17151	6.34838	6.57166	6.63297	6.22187	7.02697	6.67628	6.68628	6.34083
rna-NM_153055.3	8.35038	7.42622	7.2658	8.30442	7.96182	7.99267	7.37094	6.61324	8.33033
rna-XM_036162626.1	6.68065	5.49584	5.13811	5.07262	6.97711	4.58973	4.12704	4.12101	8.13041
rna-XM_006521427.3	5.85833	6.38766	6.23673	5.90572	5.46587	5.99662	5.90731	5.36761	5.83701
rna-NM_001286713.1	5.964	3.17337	3.17337	3.17337	8.39565	8.23761	8.81752	9.16654	5.56261
rna-XR_004938675.1	4.85951	7.34944	3.17337	4.94095	7.52924	7.17594	7.57076	7.56282	6.696
rna-NM_001358917.1	4.95077	5.79336	5.70605	5.8606	6.57343	6.3183	5.98548	7.07077	7.00417
rna-XM_011239402.3	9.01871	5.11168	9.41184	8.88864	8.6906	8.5104	8.78043	8.76626	8.35876
rna-NM_001374087.1	4.32259	3.8822	6.84233	4.68323	4.74919	7.17594	4.43563	6.58293	7.72684
rna-NM_001355505.1	7.30402	5.37992	4.98697	6.86413	6.42308	6.19836	6.47694	6.78261	6.01791
rna-NM_007737.2	5.26042	3.17337	4.29027	5.07262	5.43665	5.17779	5.4019	5.33006	5.596
rna-NM_001347226.2	10.1453	7.81656	10.5479	10.1052	10.1281	8.87608	9.86543	6.50421	3.17337
rna-NM_009752.2	4.46738	7.28904	3.91476	4.26422	7.24359	7.77184	7.29009	6.92194	7.32648
rna-NM_133999.1	6.64352	6.32832	6.50814	6.38842	6.66142	6.53129	6.50345	6.6429	6.35993
rna-XM_036162095.1	7.09166	7.03055	7.20337	6.16782	6.95744	7.32509	7.22828	6.48793	6.34083
rna-NM_009679.3	9.58951	9.55726	9.71613	4.49476	4.23305	9.59399	9.46583	9.47543	9.26787
rna-NM_201244.1	5.6448	5.70126	5.48001	4.73954	5.49446	4.87771	5.54052	5.57289	5.3819
rna-NM_001276387.1	3.17337	3.17337	5.02651	5.36847	5.13938	3.17337	5.43081	5.07849	4.74066
rna-XM_017317615.2	7.64653	8.36623	8.06922	8.21964	5.34491	8.17626	7.55199	5.72278	8.49307
rna-NM_170669.2	10.7097	11.315	10.9731	10.9122	10.5573	10.4933	10.614	10.325	10.7218
rna-XM_036156429.1	11.4813	11.6607	11.3431	11.3244	9.03438	9.59399	9.40623	9.3156	9.62059
rna-NM_001355619.1	7.49587	7.40741	7.5173	7.65478	7.38252	7.81276	7.59542	7.58577	7.58945
rna-NM_027060.1	3.17337	6.81846	7.17923	3.17337	6.33378	3.17337	6.84074	6.87283	3.17337
rna-XR_004940733.1	3.93682	6.78958	4.43143	8.48234	7.59417	5.2428	4.29404	8.14475	6.19934
rna-NM_173382.2	7.189	8.2914	8.28754	7.8253	7.54903	7.16013	7.83679	7.77071	6.91723
rna-XM_006539204.5	6.081	7.0057	6.98861	6.05295	7.08973	6.78001	7.46097	6.58293	6.75461
rna-NM_173001.3	7.40315	7.6823	7.72016	7.58862	7.78971	7.55977	7.57076	7.73695	7.65979
rna-NM_001357748.1	9.58466	9.50527	9.57123	3.17337	9.20173	5.36376	5.27944	5.88327	9.49821
rna-XM_006504653.5	9.2811	5.87964	9.39628	6.07277	7.57499	4.78948	5.78105	5.12402	5.83701
rna-XR_001784219.2	4.46738	5.76335	5.48001	6.01246	6.02568	6.10114	5.75882	7.45055	3.66709
rna-XM_006529447.5	3.17337	6.55202	6.22089	6.23946	6.47962	6.97366	6.35108	7.35574	7.31683
rna-XM_030247321.2	5.69522	5.53233	5.65899	6.29089	6.28691	6.22932	6.56762	6.82198	6.34083
rna-NM_001253822.1	9.32443	9.97226	9.33955	8.46034	6.02568	5.80271	5.92727	6.0936	5.86435
rna-NM_009190.2	9.19034	9.10342	9.22285	9.00967	9.44594	9.43623	9.28287	8.96285	9.5067
rna-NM_001001804.2	6.17151	5.3389	6.17225	5.97075	5.86329	6.42881	6.02297	6.23771	6.11157
rna-XM_036159663.1	5.07601	5.20745	5.102	5.60957	4.93822	5.17779	4.49957	4.98211	4.86385
gene-LOC115490257	3.17337	5.00801	4.29027	4.49476	4.84747	5.36376	4.99267	5.25156	4.14706
rna-XR_003947308.2	3.17337	4.03729	4.49518	4.62395	4.23305	5.03682	4.55982	4.98211	4.44451
rna-XM_011245706.4	8.73613	5.76335	8.60296	9.05195	8.88701	9.33116	9.18695	5.47421	9.25281
rna-NM_011865.4	10.7478	10.8481	10.4247	10.5575	10.0552	10.3755	10.232	10.0177	10.4028
rna-NM_025300.4	3.17337	3.17337	3.17337	4.68323	4.79936	5.10927	5.66612	4.63543	4.14706
rna-XM_030249980.2	10.7007	8.61965	3.60453	10.2	11.3265	10.9511	5.98548	10.5639	10.8119
rna-XM_036156047.1	5.59241	5.16047	5.42413	6.0923	5.94687	5.2428	5.90731	5.90828	5.49325
rna-XR_004937531.1	8.13705	7.41684	7.82218	8.35697	8.94778	7.77184	8.72015	9.25733	8.01005
rna-XM_036159708.1	6.84216	7.52549	7.44502	7.43136	7.03452	7.38066	7.33476	8.05449	7.83209
rna-NM_001361686.1	7.1631	6.03753	5.70605	7.90353	9.0297	8.07903	7.51368	8.36835	8.4845
rna-XM_030243710.2	8.27203	9.03477	9.12973	8.47504	6.8334	6.60356	6.1125	5.98071	5.52838
rna-XM_036154431.1	6.95734	6.6357	7.0871	6.80685	6.76708	6.19836	6.58011	6.74212	6.79704
rna-NM_011075.2	3.93682	5.06093	3.17337	5.22905	5.176	5.2428	5.21359	4.7009	6.34083
rna-NM_010072.4	5.67024	3.17337	3.17337	6.59277	6.42308	5.30469	4.90933	5.43962	6.46939
rna-NM_001190444.1	10.6342	10.1222	9.95435	10.333	10.5186	10.5442	10.6802	10.1958	10.5912
rna-NM_001359292.1	8.57908	8.55289	8.30617	8.29202	7.61933	7.29647	7.49414	7.60087	7.32648
rna-NM_001252508.1	7.78853	7.75099	8.37133	8.16173	7.85999	7.79245	7.9414	8.18033	7.68249
rna-XM_011243288.4	8.74775	9.33204	9.25004	8.86093	8.9748	9.0051	8.76695	9.23577	8.77555
rna-XR_383996.5	3.17337	5.63621	5.85902	5.07262	5.72753	3.17337	5.10797	5.75087	5.3819
rna-XM_006515325.2	8.05517	8.03422	8.50959	8.01344	8.18031	8.21491	8.10903	8.31448	7.79091
gene-Gm15590	9.77696	10.2762	10.0765	9.90944	8.74299	8.81201	8.82013	8.51088	8.82052
gene-Gm15596	6.35215	6.46307	6.3429	6.84149	6.17104	6.50636	6.39429	6.0936	6.97987
rna-XM_006516641.3	6.13601	4.46888	5.20737	9.25293	9.1702	9.04424	9.01973	9.58749	9.03531
rna-NM_001025359.2	6.081	4.89481	3.17337	3.17337	6.31832	6.69452	10.2764	4.63543	3.17337
rna-XM_030248923.2	6.47033	4.95273	5.55966	7.33771	6.75572	6.8006	6.42238	7.07077	6.19934
rna-NM_026140.3	6.09958	6.06218	5.93935	5.60957	5.96699	6.1667	5.94695	6.15719	5.72183
rna-NM_001364706.1	5.79079	6.84676	7.17923	7.34575	7.54246	6.60356	6.12973	4.56584	7.95521
rna-XM_006527317.1	10.3237	10.4059	10.377	10.2435	10.7098	10.6621	10.6614	10.2848	10.5248
rna-XM_017317470.3	5.6448	5.90724	6.23673	6.29089	5.57671	5.76041	5.8665	6.0936	5.42006
rna-XM_006502148.3	6.35215	6.48132	6.52107	6.44988	5.70353	6.06716	5.96635	6.59817	5.94326
rna-XM_006541156.2	7.41781	7.01818	5.17321	7.52635	5.84157	6.8006	6.29132	5.29141	4.97545
gene-Gm10819	8.82933	9.43058	8.99845	9.12599	9.10944	9.09067	9.10362	8.61481	9.21704
rna-XM_006495747.5	6.32099	7.93279	8.45386	8.3208	7.96673	8.19958	8.48349	7.65975	9.28278
rna-NM_001379260.1	4.90601	5.11168	4.86001	4.98643	9.26677	9.37956	5.6899	9.00312	9.19093
rna-XM_036156408.1	8.66128	8.12324	8.4572	8.1932	8.88701	8.93742	9.45578	8.78947	9.60288
rna-NR_015388.2	3.17337	3.17337	4.55526	3.62751	4.74919	5.17779	4.99267	5.16797	5.17224
rna-NM_175419.4	4.24116	6.81846	6.46861	5.79002	5.60305	6.37464	3.17337	5.80537	3.17337
rna-XM_011244883.4	8.59526	4.46888	9.2805	6.43476	9.73305	3.17337	9.71775	5.60423	3.17337
rna-NM_183155.3	6.00411	5.90724	5.65899	5.43297	4.93822	5.42029	4.55982	5.29141	4.02049
rna-XM_036152854.1	5.42173	6.69926	4.86001	5.03027	5.54985	4.69402	5.24693	7.28262	5.26022
rna-NM_026620.3	8.61125	8.9003	8.87663	8.70132	8.51093	5.42029	8.33423	8.55413	8.33033
rna-NR_110572.1	4.85951	6.87451	3.91476	4.79322	7.68636	8.0365	4.72283	4.41131	5.89116
rna-XM_036153627.1	9.03302	8.57829	9.2051	9.05195	9.01321	8.80189	9.05564	9.20651	8.3351
rna-NM_011938.5	7.77153	7.28904	7.9271	7.12043	7.65019	7.29647	7.7351	4.32421	7.26756
rna-XR_004940166.1	3.17337	4.76979	4.76718	4.17295	5.13938	3.17337	5.4868	5.40411	3.17337
rna-XM_036158264.1	7.39576	8.01574	7.58	7.88161	7.38252	7.54769	7.53933	6.87283	7.33607
rna-XR_001780815.3	3.17337	9.06202	9.24426	9.34581	9.50946	8.68567	9.48406	9.28559	8.50584
rna-NM_029963.2	8.08299	7.25785	7.79073	8.01344	8.18873	7.67527	7.70143	8.27271	8.01601
rna-XR_001785575.2	6.97732	4.83395	4.90383	4.84453	5.43665	7.33918	3.78302	4.87748	3.86828
rna-NM_207223.1	5.42173	5.4197	5.58519	5.66362	7.79524	7.63018	7.76799	8.28209	5.07771
rna-NM_001167918.1	6.59245	7.81656	7.66919	6.94065	6.45163	6.28926	5.73623	7.30125	6.83824
rna-NM_025369.3	6.23992	5.76335	6.12186	6.11157	6.00639	6.42881	6.72203	6.45479	6.35993
gene-Gm3145	6.27291	5.45832	5.81703	5.94941	6.18819	6.50636	6.33638	6.25713	6.75461
rna-NM_211358.2	7.76582	7.42622	7.66919	7.58862	7.43312	7.54769	7.48757	7.09235	7.65979
rna-NM_026936.3	8.24356	8.39033	8.37839	8.36883	8.44569	8.40739	8.79113	8.70479	7.76279
rna-XM_030254369.1	4.39761	7.21519	7.41093	7.37747	7.2677	7.90079	7.32002	7.64525	7.69743
rna-XM_006505409.4	7.33526	7.0057	7.0609	7.43136	7.19412	7.25245	7.29763	6.92194	7.36446
gene-Uqcrh-ps1	5.45174	5.11168	5.45236	4.62395	5.13938	5.17779	4.95171	4.98211	5.30205
rna-NM_001024928.2	6.70488	3.17337	6.13886	3.17337	6.08198	6.10114	6.60477	3.17337	3.17337
rna-XR_004941971.1	3.17337	5.49584	5.45236	6.46484	5.75111	8.07903	8.69759	8.48267	7.36446
rna-NM_026276.3	6.45609	7.27872	7.33293	6.46484	7.02511	7.02697	7.40624	6.99256	6.75461
rna-NM_023311.3	9.51837	8.67562	8.94716	9.03221	9.30016	9.26644	9.30914	9.22608	8.99965
rna-XM_036154870.1	5.26042	4.62958	6.50814	3.17337	5.86329	6.1343	6.21286	6.96941	6.11157
rna-XM_006517308.5	6.41248	3.17337	7.09572	3.17337	7.29923	6.89932	3.17337	5.50792	6.24125
rna-NM_178621.4	6.11791	5.87964	8.6764	8.72611	6.43743	6.53129	6.47694	9.13582	9.35509
rna-XM_884704.8	7.88652	8.63586	8.08658	8.47138	8.09326	7.99267	8.06561	7.92858	8.40038
rna-XM_017321454.2	5.32735	4.70185	5.02651	5.63686	6.06347	5.52657	6.5423	7.03778	5.34258
rna-XM_006538052.3	4.53271	4.62958	4.81451	4.5613	5.02264	4.34441	4.49957	4.93092	4.25711
gene-Gm9712	7.02608	7.36903	7.19537	6.73491	6.62438	6.78001	6.51652	6.25713	6.68096
rna-NM_001374727.1	8.84023	8.0585	8.81293	8.39998	8.87663	8.21491	8.96647	8.93338	9.48967
rna-XM_036154252.1	6.99702	6.44459	6.23673	6.89743	7.59417	6.91827	7.16369	7.54731	7.26756
rna-NM_001080384.3	11.2689	3.17337	11.1669	3.17337	6.96731	6.3183	3.17337	8.30069	3.17337
rna-NM_010948.3	7.80533	7.91959	7.73125	8.06296	7.89646	7.86233	7.52014	7.8037	8.21062
rna-NM_001302440.1	7.92802	8.01574	4.02642	7.84242	8.01963	7.89127	3.60605	8.16011	7.65979
rna-NM_001346609.1	10.1714	10.6638	10.4708	10.3188	4.14419	10.6036	10.6163	10.1695	10.6198
rna-NM_023738.4	8.95496	6.8607	6.18865	7.66765	7.54903	7.91025	7.46097	7.004	7.62895
rna-NM_011808.3	8.77072	7.67446	6.26789	6.60629	5.81951	7.86233	8.14701	8.01561	7.23717
rna-NM_019639.4	13.6432	14.866	14.109	14.6035	12.9349	13.2632	13.1027	13.101	13.6832
rna-NM_001355416.1	7.08247	7.52549	7.376	7.36961	7.69822	7.88169	7.53933	7.54731	7.68998
rna-NM_175116.4	8.2019	7.50795	7.2658	7.81377	9.0916	9.04424	8.87142	8.28209	9.04116
rna-NM_001286944.1	9.79946	10.7463	10.1669	10.2795	9.1358	9.26276	9.24059	8.957	9.93084
rna-NM_028336.3	3.17337	4.83395	4.94611	3.17337	3.17337	5.30469	3.17337	6.35043	6.04192
rna-NM_001034097.2	4.99395	6.55202	4.12379	4.68323	5.13938	6.89932	4.95171	5.03124	4.80388
rna-XM_006534030.5	6.4417	5.82273	4.02642	3.17337	3.17337	8.20726	7.47433	3.17337	7.26756
rna-NM_008784.3	8.39912	8.49628	8.31724	8.61436	8.36626	8.43384	8.09182	8.27741	8.0914
rna-NM_134058.3	8.28006	8.99761	8.2418	7.95691	7.69822	7.76143	7.56453	8.05449	7.29733
rna-NM_007553.3	10.2794	7.17121	7.9271	6.9192	6.42308	6.86065	5.94695	5.88327	6.28193
rna-NM_025577.3	8.60807	8.42341	8.36423	8.61768	8.42089	8.83699	8.54166	8.64785	8.55581
rna-NM_007920.4	3.17337	9.39768	7.87809	3.17337	8.5243	3.17337	8.61873	7.94642	3.17337
rna-XM_036153076.1	6.22312	6.01243	6.29838	6.67206	4.31393	6.50636	6.5423	3.17337	3.17337
rna-NM_001378997.1	9.3341	9.42593	9.66511	9.85149	9.5245	9.74676	9.61017	9.71936	9.75494
rna-XM_030249512.2	6.91652	7.16001	6.72463	3.17337	3.17337	3.17337	3.17337	6.56754	6.53791
rna-NM_001310440.1	7.264	8.11747	8.32457	8.27531	7.89646	8.67463	8.24755	8.90633	7.70484
rna-NM_153535.2	6.25651	6.60282	6.20486	6.38842	6.62438	5.84374	6.50345	6.2952	5.94326
rna-XM_017322299.1	4.85951	4.76979	5.17321	3.17337	3.17337	6.1667	5.71326	5.29141	5.91745
rna-XM_036164632.1	8.29202	7.41684	8.49342	8.26266	8.65155	8.39399	8.75335	8.62591	9.25785
rna-NM_197980.1	6.93708	6.51711	6.73574	7.08239	7.16873	6.91827	6.74437	6.68628	6.76889
rna-NM_011664.4	6.59245	7.12585	7.14641	7.02336	6.61181	6.88012	6.38004	5.85779	7.11986
rna-XM_036163037.1	7.51644	7.11427	7.376	7.49055	7.32243	5.47449	6.8613	4.98211	7.35506
rna-NM_001025245.1	6.91652	7.72086	8.08226	7.7242	7.83336	7.96572	7.96523	8.11354	7.33607
rna-XM_006496551.5	5.26042	5.06093	6.0517	5.5817	4.69672	5.84374	5.6899	6.13631	5.12586
rna-NM_027278.3	7.80533	8.19068	7.75859	7.45384	7.62556	7.77184	7.53933	7.15521	7.93015
rna-XM_006497691.5	7.74854	3.17337	3.17337	3.17337	8.07521	8.28923	7.81597	7.56282	3.17337
rna-NM_177572.4	3.17337	5.29655	5.02651	5.8606	5.52244	5.42029	5.59218	5.72278	4.86385
rna-NM_001272078.1	8.33505	6.28733	6.86272	9.7127	9.5061	9.10719	10.1461	8.0324	9.15087
rna-NM_025985.4	9.43996	9.30948	9.40494	8.96872	9.1531	8.97841	9.24448	8.86322	8.9507
rna-NM_175472.4	6.53947	7.89957	5.61024	5.46408	7.90671	6.3183	6.14676	3.17337	6.52109
rna-XM_017313116.2	9.51327	10.0224	9.97893	9.75395	3.17337	3.17337	10.1124	3.17337	3.17337
rna-XM_006500123.4	6.656	7.72086	7.21132	5.99176	6.56041	6.86065	6.49025	6.43793	6.52109
rna-XM_017319427.2	6.64352	7.30946	8.65911	7.02336	8.07974	6.88012	7.87754	8.78288	3.17337
rna-XM_030249860.2	4.85951	5.70126	5.20737	4.73954	5.88466	5.67166	5.94695	4.98211	4.86385
rna-NM_001159496.1	5.79079	6.03753	3.17337	6.83004	6.89677	6.60356	6.47694	6.99256	5.96859
rna-XM_006532507.4	7.94328	7.85866	7.98842	7.6483	8.15904	7.29647	6.5423	6.72836	7.00417
rna-XM_006526003.4	5.67024	5.76335	6.28322	4.73954	5.57671	5.9223	5.84563	5.50792	5.89116
rna-NM_001378525.1	9.59916	9.38095	9.44583	9.43119	9.27864	9.41648	9.19099	8.90936	8.89681
rna-XM_030252617.1	6.30514	5.66913	5.9197	6.61969	6.22187	6.97366	6.78801	6.50421	6.97987
rna-NM_001346668.1	8.9449	5.00801	9.89285	8.438	7.78416	8.01913	4.72283	4.12101	7.69743
rna-XR_001779951.3	7.4105	4.89481	8.60296	7.8253	3.17337	5.03682	8.52573	9.19165	4.02049
rna-XM_036157854.1	7.12783	8.00953	7.19537	8.13882	7.5159	8.01913	7.90244	7.87373	7.75567
rna-NM_001355196.1	4.70787	6.26637	7.2658	7.18467	3.9309	7.95662	4.61687	5.95699	6.30184
rna-XM_030244129.1	6.11791	6.40689	7.02521	6.86413	6.58634	6.1667	7.11326	7.30125	6.32147
rna-XM_030249382.2	6.75212	4.37817	5.20737	5.76566	6.56041	7.0951	6.26046	6.50421	7.08613
rna-NM_178605.4	8.24766	8.03422	7.61035	7.9411	7.34526	7.40765	7.71836	7.47536	7.8589
rna-XM_006514004.4	4.85951	5.06093	5.61024	5.79002	5.27997	5.47449	3.17337	5.7784	6.19934
rna-NM_001362398.1	4.85951	3.17337	4.61215	4.89371	5.40678	4.69402	5.07071	5.21045	5.56261
rna-NM_133791.5	8.46751	8.8902	7.64594	7.93047	9.8504	8.42068	8.2201	8.09767	9.5668
rna-NM_025448.4	4.24116	9.19653	9.12134	9.27199	8.52762	8.56525	8.57298	4.32421	8.49734
rna-XM_036158102.1	7.62775	7.19337	7.84786	7.00313	7.88613	8.02784	7.86239	7.81021	7.53226
rna-NM_009409.2	9.2791	8.9691	8.98695	9.38719	9.78392	9.49703	9.73447	9.93837	9.84306
rna-XM_011246104.2	6.27291	6.78958	6.71343	6.13057	6.02568	6.19836	6.65285	6.50421	6.61916
rna-NM_016861.4	9.8953	9.43058	9.16485	8.02847	5.88466	5.95996	5.78105	5.6648	5.83701
rna-NM_013549.2	6.51222	8.01574	7.56768	6.72256	6.69752	6.88012	6.71073	6.38608	7.0747
gene-LOC101056304	4.90601	5.06093	5.13811	5.11358	5.06277	4.19417	4.29404	4.56584	5.45716
rna-NM_030559.3	6.33665	5.96084	6.37182	6.90836	6.28691	7.06144	5.14416	6.42085	6.37878
rna-XM_030246264.2	6.47033	6.44459	6.52107	6.23946	3.9309	6.78001	3.78302	6.55197	6.06553
rna-XM_006534961.5	6.63092	6.49932	6.66773	7.29681	5.79709	7.22234	6.50345	6.61324	7.20612
rna-NM_009890.2	11.126	9.42126	9.5743	9.88764	6.8334	6.1343	7.35658	7.04886	7.62895
rna-XR_001778845.3	4.76065	4.37817	5.77372	4.17295	5.60305	6.55579	5.37234	5.33006	6.53791
rna-XM_036160725.1	6.35215	6.69926	6.13886	5.92774	6.58634	7.11164	6.2289	6.87283	6.46939
rna-NM_001161413.1	5.39102	5.90724	6.40016	5.68986	5.65422	5.03682	5.3421	5.40411	6.17791
rna-XM_006504265.5	8.75641	8.63989	8.22623	8.04828	8.18873	7.91025	7.82642	8.02123	8.94759
rna-NM_001024474.2	9.24261	9.16615	9.54481	9.06415	9.46165	9.69306	9.81263	9.94429	9.15627
rna-XR_003953884.2	4.32259	6.46307	5.24064	6.01246	5.37621	4.78948	4.29404	8.84751	3.17337
rna-NM_015772.3	6.8745	6.92844	3.60453	6.9192	7.61933	7.32509	7.57076	7.99862	7.53226
rna-XM_017320455.2	7.42509	6.38766	7.66341	8.05808	6.96731	7.00942	8.06561	8.44973	9.08718
rna-NM_001362209.1	8.85642	9.16894	8.63574	8.43425	8.66368	8.80696	8.74237	8.58479	8.67741
rna-XM_006527617.4	6.39763	6.65186	7.06969	7.26323	5.88466	7.91025	6.27597	7.39094	7.29733
rna-NR_027969.1	4.46738	3.17337	4.86001	4.84453	3.17337	5.2428	4.49957	4.82154	4.35533
rna-NM_178680.4	8.29202	8.30161	7.5173	8.10612	7.81715	7.63018	7.8212	7.004	8.08006
rna-NM_027592.3	7.60233	6.58608	6.44162	8.01847	7.31474	7.35314	7.44069	7.53949	7.98593
rna-NM_001146201.2	6.22312	7.46312	7.55525	7.51214	6.87596	7.20704	7.14708	6.74212	7.09746
rna-NM_172467.3	4.70787	4.27823	4.76718	4.49476	5.2116	5.42029	5.10797	4.49144	4.44451
rna-XR_373613.3	7.89701	7.94587	7.77475	8.06296	7.61933	7.95662	7.65528	7.62324	7.76987
rna-NM_001301781.1	5.5098	6.06218	6.60845	6.18607	5.84157	6.34675	6.38004	6.76924	6.60328
rna-NM_001316734.1	7.37337	7.25785	8.09089	7.55436	6.84416	7.35314	7.6843	6.98103	8.10825
rna-XM_030242830.2	5.39102	5.49584	9.2558	5.60957	8.66971	8.48533	4.72283	8.77625	8.02195
rna-XM_006539040.4	6.68065	7.74352	7.45175	6.32415	6.22187	6.37464	5.80291	6.0936	3.17337
rna-NM_028712.4	8.63648	8.26557	8.42005	7.96736	8.66066	8.47263	8.65138	8.64057	8.87073
rna-XM_017319316.3	5.35957	5.9343	6.87281	7.56816	7.8547	7.36696	6.33638	6.19803	5.75155
rna-NM_001357809.1	7.04512	6.49932	6.69076	6.59277	5.13938	7.07837	5.3421	5.6648	6.75461
rna-NM_009745.2	8.09214	8.07049	7.83764	8.01344	8.1111	7.60709	8.13866	7.61582	8.7182
rna-XM_006517956.5	9.57164	7.17121	7.03422	9.27829	10.018	9.98883	8.41598	9.87469	9.11244
gene-Gm10240	6.99702	7.69009	7.18732	7.56128	7.03452	7.39422	7.25952	7.19563	7.3456
rna-NM_029720.2	7.74274	6.87451	6.95105	7.73647	7.28356	6.8006	7.36378	6.92194	7.0747
rna-NM_001293766.2	4.76065	4.76979	4.3634	4.89371	5.34491	4.87771	5.66612	3.17337	5.21698
rna-NM_007512.4	10.1917	10.115	10.0133	10.0011	10.1955	10.1003	10.2943	10.0551	10.4716
rna-XM_030242866.2	9.48404	9.55514	9.27105	9.34181	9.62868	9.5064	9.29794	9.61559	9.51934
rna-NR_028142.1	4.05162	10.3578	6.97931	5.52418	5.57671	9.62586	6.07738	5.43962	5.26022
rna-XM_030254506.2	6.13601	7.12585	7.47173	5.49447	3.17337	3.17337	7.09605	3.17337	7.02807
rna-XM_006510046.5	6.15387	3.17337	4.49518	5.99176	6.58634	6.57988	6.2289	6.67197	6.48683
rna-NM_008202.2	8.61125	9.35915	9.24619	9.13989	8.27035	8.6579	8.56366	8.60363	8.59617
rna-NM_001285427.1	7.15436	7.88606	8.3571	8.21964	8.30948	8.02784	8.15532	8.24417	7.4727
rna-NM_001039551.2	4.85951	7.07899	6.75771	5.43297	5.06277	7.55977	5.10797	5.36761	5.07771
rna-NM_001127356.1	8.4988	8.14607	7.8325	8.30853	8.26239	8.40071	8.56053	8.31904	8.01601
rna-XM_006508123.4	9.18394	8.73704	8.75444	8.77445	9.21209	9.33467	9.36924	9.15637	9.77441
rna-NM_001290485.2	5.90157	5.70126	5.68273	6.03285	5.79709	5.76041	6.19662	6.65751	6.35993
rna-NM_010316.3	9.84615	10.1464	10.0569	9.5189	10.0297	9.95272	10.1113	9.95019	9.8194
rna-XM_006520695.1	5.42173	5.60247	4.94611	5.11358	5.84157	5.80271	5.03231	5.03124	5.42006
rna-XM_006540378.5	5.9435	4.16621	6.31338	6.03285	6.02568	6.3183	4.21445	5.75087	6.17791
rna-NM_126165.2	9.01149	9.4048	9.49536	9.01219	9.20588	8.6635	8.98289	9.17664	8.94759
rna-XM_006515433.5	7.53672	7.07899	5.102	6.05295	8.00062	7.14415	8.04341	7.49166	7.72684
rna-XM_011242104.4	6.15387	5.98687	6.32822	6.05295	6.4657	6.10114	7.05208	6.2952	6.78303
rna-XM_006509469.5	6.11791	6.42587	6.57166	6.95126	8.08877	7.99267	8.23585	8.73926	8.11382
rna-XR_004941816.1	6.7287	8.07645	7.23492	6.0923	6.53399	6.42881	7.86239	7.3468	7.81164
gene-Rnf170-ps	6.90613	5.76335	6.3429	6.55139	6.57343	6.55579	6.5925	6.8976	7.14192
gene-Gm10259	6.41248	6.01243	6.0336	6.27395	5.79709	6.10114	6.00435	5.88327	5.75155
gene-Gm10250	10.0881	10.1855	10.0031	9.94286	9.90376	9.77288	9.91759	9.45068	10.2682
gene-Gm10254	6.22312	5.76335	5.97782	5.63686	5.54985	5.57669	5.54052	5.40411	5.96859
gene-Gm10257	7.93821	8.1404	7.89297	7.97772	8.11993	7.98374	8.0744	7.7163	8.33033
rna-NM_001368627.1	8.84835	8.65588	8.69348	8.87208	9.19965	9.42309	9.28097	8.86946	9.23759
rna-XM_006540604.5	8.33119	8.08238	7.59221	7.98288	8.15904	8.07063	8.01173	7.98718	8.38664
rna-XM_006517207.3	7.264	3.17337	6.85256	6.49428	5.02264	7.29647	4.86539	4.98211	7.64445
rna-NM_178367.4	6.57939	6.81846	7.04317	6.90836	7.24359	6.89932	7.3126	7.39094	6.60328
rna-NM_019641.4	8.21033	8.15735	8.42346	8.58756	8.92529	8.86154	8.66016	8.62959	9.02352
rna-XM_006502785.5	8.15026	7.30946	7.1043	7.62208	7.66839	7.64159	7.48096	8.20522	7.48997
rna-NM_183289.3	4.85951	5.00801	4.81451	5.19171	5.60305	3.17337	5.17935	5.6648	5.17224
rna-NM_026411.2	5.9435	3.17337	7.09572	5.07262	3.17337	5.03682	6.88157	5.47421	3.17337
rna-NM_001081086.1	9.70726	10.1236	9.6271	10.0596	9.90632	9.76509	9.99013	9.66841	10.565
rna-NR_104358.1	4.81112	7.04281	7.1043	4.79322	7.59417	5.03682	7.49414	4.82154	5.12586
rna-NM_001024952.2	8.57908	8.54002	8.31356	8.52535	8.67271	8.40739	8.68331	8.70479	8.52687
rna-XM_006526769.3	8.05985	3.17337	8.57865	8.46403	8.67271	9.64296	8.41598	9.03677	8.63542
rna-NM_001360658.1	11.0216	11.1421	11.0661	11.0651	10.8844	10.5305	10.6424	10.2766	10.8281
rna-NM_029231.4	7.18042	6.38766	6.69076	7.58862	7.05316	7.26728	7.23616	7.24461	7.88522
rna-NM_001081982.3	8.31174	8.98184	9.03464	9.07625	9.58153	8.63529	8.98755	9.46517	8.59218
rna-XM_006497944.4	7.10079	7.01818	6.44162	7.17566	5.70353	6.45513	6.62901	6.21801	6.45173
rna-NM_010135.3	8.35419	8.82452	8.90623	8.27951	8.86617	8.79681	8.89887	9.0533	8.52687
rna-XM_006514270.2	3.17337	7.93934	7.50443	9.07384	3.17337	8.23009	3.17337	7.81021	9.047
rna-NM_026679.2	4.32259	7.39791	5.95872	4.17295	4.58382	7.473	4.99267	4.32421	4.25711
rna-NM_080557.2	8.58233	8.99133	8.87912	8.50759	8.29785	7.68633	8.00714	7.89837	8.11382
rna-XM_036164238.1	6.30514	3.17337	7.06969	6.11157	3.17337	7.14415	3.17337	7.57051	3.17337
rna-XR_004933996.1	7.42509	7.19337	7.06969	6.14932	6.9375	6.99165	6.88157	6.50421	6.34083
rna-NM_013590.4	3.17337	3.17337	5.17321	5.11358	5.72753	3.17337	6.29132	5.88327	6.08874
rna-XM_036152293.1	7.78289	7.81656	3.17337	7.61545	3.17337	5.42029	5.6899	5.85779	5.83701
gene-Gm46649	6.51222	7.03055	6.64431	7.00313	6.47962	6.42881	6.40841	6.15719	5.89116
rna-NM_007924.2	7.6403	7.73601	7.85294	7.02336	7.46819	7.43415	7.29009	7.49974	6.78303
rna-XM_011248362.3	5.76752	5.37992	5.33561	3.17337	3.17337	6.28926	5.80291	5.98071	6.37878
rna-NM_022313.2	6.23992	5.9343	5.45236	5.7156	6.27093	5.95996	6.05948	6.04954	6.35993
rna-NM_001378797.1	8.81835	9.19105	8.97536	9.07866	8.55066	8.52891	8.65138	8.63692	8.5185
rna-NM_175158.3	6.09958	5.53233	5.48001	6.13057	6.06347	6.3183	5.82444	6.15719	6.32147
rna-XR_003953457.2	5.39102	6.34838	5.77372	5.7156	5.40678	5.10927	5.4868	6.0936	3.17337
rna-XM_006523035.5	6.656	6.69926	3.17337	6.37262	6.77835	6.45513	3.60605	7.8037	7.28747
rna-XM_006534303.2	8.44982	9.05601	9.25772	8.71687	8.35882	8.28923	8.46022	8.56186	7.97372
rna-NM_001177812.1	8.81835	8.95302	5.97782	8.88864	8.66066	5.76041	8.66016	8.34615	6.39737
rna-NM_013867.3	7.81089	8.16855	8.09089	7.15749	6.43743	6.64977	6.26046	5.98071	6.26174
gene-Gm13904	5.53791	5.4197	5.55966	5.40111	5.57671	5.67166	5.5666	5.40411	5.21698
rna-NM_009443.3	11.0664	11.6129	11.3606	11.383	10.6409	10.7236	10.8856	10.6506	10.7236
rna-NM_030215.3	7.95838	7.80942	8.06046	7.71182	7.76174	8.02784	7.7734	8.00431	7.84555
rna-NM_029537.2	6.77517	6.30797	5.55966	5.43297	7.66839	7.5954	7.88256	7.05986	8.08574
rna-XM_011248768.3	6.42716	3.17337	5.9197	3.17337	6.15368	6.28926	6.83035	7.16542	6.32147
rna-XM_006523559.5	3.17337	5.20745	4.49518	4.73954	5.06277	4.47435	4.95171	3.17337	3.17337
rna-NM_001012667.2	8.08757	8.00329	7.99303	8.01344	8.28613	8.49792	8.16769	8.049	8.3351
rna-XM_006532178.5	7.8492	7.30946	8.03387	7.92512	9.185	8.92815	9.26572	9.05056	8.65847
rna-NM_001360913.1	6.82018	6.49932	6.50814	5.79002	7.46124	6.88012	8.03892	7.99291	7.19562
rna-NM_026255.5	5.964	5.9343	5.30472	6.05295	6.54726	6.1667	6.38004	5.6941	5.75155
rna-XM_036165653.1	6.15387	6.68364	6.26789	6.32415	6.02568	5.67166	5.59218	5.6941	5.72183
rna-NM_008521.2	8.32344	3.17337	4.12379	8.77742	9.30791	9.83121	9.57503	3.17337	9.36446
rna-NM_024171.2	9.42917	8.93348	8.90867	9.0495	8.97236	8.9694	8.89887	8.47859	8.85419
rna-NM_030561.3	3.17337	8.25511	8.09518	8.12023	8.29785	8.14457	8.44675	7.52372	8.50584
rna-NM_001166218.1	4.81112	3.17337	4.29027	4.49476	5.02264	4.58973	5.14416	5.07849	5.49325
rna-XR_001783177.2	6.8638	6.90173	7.85801	7.71802	7.59417	7.17594	6.42238	7.52372	7.49853
rna-NM_011240.3	7.40315	7.96526	7.73676	8.27111	7.78416	7.04431	7.69003	7.89837	8.46719
rna-mt-Rnr1	12.0817	12.7792	12.578	13.7227	12.6507	12.4501	12.8332	13.7682	14.0237
rna-NM_010270.2	7.75432	5.20745	6.12186	5.83748	8.1111	7.85255	5.82444	7.3378	8.00405
rna-XM_006506438.3	5.5098	5.76335	6.53389	6.05295	5.98683	5.80271	4.95171	6.23771	5.89116
rna-XM_017319777.3	3.17337	5.98687	6.29838	4.49476	3.17337	6.1667	6.95032	4.82154	6.50407
rna-NM_011186.1	9.59273	9.61564	9.31217	9.01722	8.905	8.98289	8.77506	8.61481	9.01164
rna-NM_008509.2	10.247	8.77047	8.75173	7.88712	8.12433	8.37364	8.0612	8.00997	7.7341
gene-Gm5561	7.88125	7.97805	7.63417	7.73035	7.14287	7.38066	7.22037	6.94587	7.31683
gene-Gm5560	6.8745	7.13732	6.62051	6.84149	6.28691	6.71638	6.72203	5.80537	6.19934
gene-Gm5566	9.37401	9.7483	9.35394	8.93987	8.62388	8.6635	8.5574	8.24417	8.55581
gene-Gm5564	8.47452	8.81743	8.86913	8.9023	8.76285	8.52277	8.65724	8.48673	8.99362
rna-NM_025316.2	9.8953	9.95944	9.99394	9.72197	9.59425	9.911	9.98432	9.70548	9.72615
rna-XM_006531450.5	7.5959	5.20745	7.376	7.46126	3.17337	7.719	7.7071	7.47536	7.62895
rna-XM_011239205.3	4.59426	5.11168	4.94611	5.36847	4.74919	5.10927	5.31115	5.21045	4.25711
rna-NM_026027.3	8.99208	8.75941	8.72151	8.7535	8.78245	8.71292	8.64845	8.50288	9.14544
rna-NM_001358737.1	6.23992	3.17337	3.17337	4.49476	5.62888	5.88358	4.55982	6.70044	5.42006
rna-XM_036157984.1	7.97332	8.38074	8.50637	8.46034	8.56367	8.48533	5.61728	6.04954	5.69145
rna-NM_010218.2	6.00411	6.30797	6.0517	5.76566	6.76708	7.11164	6.76635	6.96941	6.43384
rna-NM_019537.3	6.99702	6.06218	6.72463	6.46484	6.62438	6.25961	6.74437	6.48793	6.60328
gene-Gm18293	6.47033	6.17928	6.13886	5.99176	5.86329	5.30469	5.73623	5.85779	6.17791
rna-NR_037961.1	3.17337	6.20157	6.15565	5.22905	5.2116	5.36376	5.37234	5.72278	5.12586
rna-XM_006504261.5	5.1151	5.63621	6.18865	6.07277	3.17337	5.67166	5.80291	6.36837	6.35993
rna-NM_007874.3	9.59756	9.86462	9.72999	10.1146	10.1216	10.2018	10.2082	3.17337	9.77265
rna-XM_006516762.5	6.89567	5.63621	6.65607	6.74716	7.2677	7.19157	6.61695	6.87283	7.0747
rna-NR_152134.1	6.35215	5.66913	5.95872	5.49447	5.84157	5.47449	6.00435	5.63485	5.78063
rna-XR_004936196.1	4.59426	5.11168	4.61215	3.95368	4.45775	4.34441	3.78302	4.76279	4.80388
rna-XM_006522394.5	7.67729	6.51711	6.55918	7.46864	6.39393	6.3183	5.96635	6.19803	7.81849
rna-NM_008072.2	3.17337	6.66784	6.57166	6.43476	6.20513	3.17337	6.35108	7.07077	6.35993
rna-NM_001360829.1	5.15302	7.4722	7.21132	5.36847	7.50918	7.16013	4.77232	7.83596	3.17337
rna-XM_030247911.1	9.21147	8.67562	3.17337	9.63631	9.66381	9.58222	9.79945	9.52565	9.48752
rna-XM_036155219.1	6.22312	6.17928	4.81451	6.46484	4.74919	6.71638	7.44748	5.21045	4.92094
rna-NM_025868.4	9.04485	9.1208	9.0391	9.14908	8.63008	9.17537	8.78311	8.99744	8.79648
rna-XM_036161740.1	7.51644	7.14871	7.29602	6.55139	6.94751	6.88012	6.71073	7.67409	6.92998
rna-NR_169011.1	5.45174	5.16047	5.20737	5.26533	4.84747	4.47435	4.36739	4.49144	3.17337
rna-XM_006510964.3	5.03566	3.17337	6.84233	7.46864	6.57343	3.17337	6.9407	3.17337	7.0747
rna-NM_022891.3	11.4656	11.8384	11.5463	11.8069	11.1881	11.4684	11.292	11.103	11.6017
rna-NM_001163624.1	5.26042	3.8822	4.3634	4.79322	5.06277	4.95986	4.55982	4.32421	4.92094
rna-NM_130889.3	3.17337	3.17337	9.94606	10.1698	9.9316	10.0816	9.63857	9.50777	10.3125
rna-NM_133701.2	8.70367	7.04281	7.8731	8.51472	8.56043	8.39399	8.33788	8.36394	9.047
rna-XM_030247137.1	7.62775	7.53419	6.01525	6.05295	6.00639	6.71638	6.05948	6.07175	7.18504
rna-NM_019765.5	8.86445	8.89358	9.56814	9.56255	9.95152	9.24047	10.1028	10.4395	10.5006
rna-XM_036155725.1	5.07601	3.8822	4.90383	4.84453	5.13938	4.78948	3.17337	5.63485	5.17224
rna-NM_011014.3	8.01242	7.54283	6.9415	7.66123	7.87573	7.92898	7.75164	7.73695	8.07435
rna-XM_006528017.4	6.69281	7.25785	7.5237	7.32149	7.50918	7.46017	7.58315	7.68122	6.7256
gene-Gm16332	5.1151	4.89481	5.02651	5.63686	6.10025	6.28926	6.33638	5.95699	6.50407
rna-XM_036157539.1	4.24116	5.60247	6.54659	5.52418	6.58634	6.57988	5.4019	6.59817	6.30184
rna-NM_025314.3	8.01723	8.31678	8.24567	8.28786	8.59884	8.29646	8.51609	8.22483	8.26672
rna-NM_016843.4	9.92503	9.77049	9.7828	9.88764	9.89993	9.97539	9.9188	9.837	9.90217
rna-NM_001033268.3	10.9761	10.4397	10.302	10.2414	10.3079	10.5905	10.7332	10.3785	10.9239
rna-XM_036153152.1	3.79911	4.83395	4.76718	6.03285	5.31285	5.36376	5.4591	6.33226	5.596
rna-XM_036164404.1	8.72441	9.72197	9.75461	9.42552	8.82627	8.21491	8.93065	9.46104	8.53104
rna-XR_003947254.2	5.07601	6.06218	5.99666	6.0923	3.17337	3.17337	4.90933	7.09235	3.17337
rna-XM_017314648.3	7.00677	4.16621	8.11223	3.95368	4.58382	7.77184	3.60605	4.93092	4.02049
rna-XR_875096.4	5.48108	5.00801	5.39528	7.28849	7.07156	6.28926	5.73623	9.8947	4.14706
rna-NM_001363750.1	4.24116	5.70126	5.13811	5.99176	4.38845	4.34441	4.72283	5.85779	4.44451
rna-XM_030243329.2	5.5098	4.76979	5.48001	5.60957	5.92644	6.28926	5.4019	5.6941	6.08874
rna-NM_001329619.1	7.89178	5.76335	6.42794	6.46484	8.63932	7.16013	6.58011	6.23771	6.04192
rna-XM_006524775.4	4.59426	5.66913	5.06483	5.60957	5.10166	4.78948	4.95171	4.93092	4.52652
rna-NM_001285991.1	6.18892	6.26637	6.38606	7.28849	7.02511	8.01913	7.24399	8.02123	7.8253
rna-XM_036162183.1	6.93708	7.17121	7.14641	7.19361	6.23842	6.28926	6.66461	6.19803	7.60538
rna-XM_011244703.3	4.95077	3.17337	4.90383	3.17337	4.31393	5.36376	5.3421	5.03124	6.08874
rna-XM_006504569.3	6.91652	7.33955	7.01615	6.81849	6.64918	6.42881	6.56762	6.55197	6.60328
rna-NR_073420.1	8.05517	7.33955	6.73574	7.23752	8.07066	7.99267	7.93176	3.17337	7.97984
rna-XR_004941905.1	7.48199	6.83268	3.17337	7.22012	3.17337	7.25245	3.17337	5.93285	7.59744
rna-NM_001310526.1	7.01646	3.17337	3.17337	3.17337	7.52924	7.67527	3.17337	7.14492	7.62114
rna-XM_030246273.1	7.30402	7.58527	8.30987	7.97772	6.74427	7.78218	7.82642	7.96985	7.71221
rna-NM_009234.6	7.53672	7.95883	8.17036	8.66332	8.35882	8.01913	8.12603	9.10971	8.15224
rna-NM_001285423.1	9.94661	10.2942	10.1546	9.34181	9.19965	9.22162	9.09285	8.78618	8.95381
rna-NM_181315.4	6.081	5.4197	5.81703	5.30063	5.06277	3.17337	5.51393	4.63543	5.02764
rna-XM_036155960.1	7.90742	7.75843	6.58403	7.94639	7.6923	8.00154	7.93176	8.07624	7.97984
rna-NM_001135001.2	8.23533	8.60325	8.87663	8.59767	8.27431	8.9694	8.33057	8.16011	4.44451
rna-NR_145503.1	6.18892	5.45832	5.75153	5.88335	5.86329	6.73791	5.78105	6.07175	5.99347
rna-XM_036156791.1	9.55189	9.31955	10.1962	9.66062	10.1871	9.34166	8.93065	10.8276	9.7478
rna-NM_001113565.1	4.15167	10.394	4.86001	4.34724	4.58382	4.34441	10.7942	4.32421	9.40136
rna-XM_017313511.2	6.20613	3.17337	5.55966	5.52418	5.34491	6.62685	5.4019	5.60423	5.62857
rna-NM_009096.3	9.77838	10.1121	9.90756	10.1028	9.329	9.51572	9.49718	9.08044	9.51514
rna-XM_036159475.1	3.17337	6.1102	3.17337	5.83748	6.22187	5.84374	6.02297	6.31385	5.78063
rna-XR_001781891.3	5.53791	4.89481	5.55966	6.11157	6.22187	6.42881	5.14416	8.3236	3.66709
rna-XM_036155425.1	8.57582	8.39986	8.47048	8.58756	9.06899	8.99626	9.0333	8.64057	8.98757
rna-NM_001347645.1	8.00759	7.18234	7.0609	7.69934	7.56855	7.11164	7.37094	7.39961	7.77692
gene-Gm12350	11.0617	11.5012	10.8642	10.4822	10.7501	10.5488	10.8147	10.1141	11.0721
rna-XM_036159126.1	8.43192	6.30797	6.15565	6.69754	8.55066	8.34605	8.36677	8.93635	8.09704
rna-NM_001305045.1	8.36555	9.12655	3.7809	8.74443	4.84747	8.51659	3.60605	3.84936	8.1359
rna-XM_011250219.4	6.53947	5.56786	5.79555	5.7156	6.61181	6.93697	6.4635	7.43377	7.01617
rna-NM_001310740.1	3.17337	3.17337	7.45844	3.17337	11.489	3.17337	11.7157	11.2351	11.9848
rna-NM_001290634.1	5.85833	4.16621	4.90383	5.43297	5.06277	5.30469	5.66612	4.49144	6.39737
rna-NM_001168525.1	9.81887	9.44675	8.84385	8.8693	10.2264	10.3514	9.93094	9.51376	10.3305
rna-NM_009119.3	9.06821	9.4329	9.23651	9.069	8.90755	8.78658	8.79379	8.51088	8.64315
rna-XM_006534231.4	3.17337	3.17337	3.17337	5.46408	5.43665	5.30469	4.55982	6.38608	4.80388
rna-XM_006517608.5	7.264	6.42587	6.91246	7.95691	7.56207	7.6973	7.7734	8.55413	8.67741
rna-NM_001357474.1	8.91429	9.29679	9.3735	9.52421	8.76003	9.21402	9.20505	8.92741	9.85142
rna-XR_878509.3	4.15167	4.83395	4.86001	5.22905	5.06277	4.47435	4.36739	7.14492	4.52652
rna-XM_017320347.2	6.61821	3.17337	5.85902	7.71182	7.56207	7.54769	8.11756	8.20522	8.414
rna-XM_036165858.1	4.59426	5.4197	4.49518	4.5613	4.69672	4.58973	4.36739	5.07849	3.17337
rna-XM_006514793.3	6.98721	7.4722	7.06969	7.3617	6.9965	8.52891	6.9788	7.52372	7.21655
gene-Gm18949	6.18892	6.1102	6.06957	6.50878	3.17337	3.17337	6.5925	6.17776	6.50407
rna-NM_001361017.1	5.26042	4.95273	4.66624	5.99176	4.38845	6.25961	6.1802	5.63485	5.94326
rna-NM_025478.3	8.01242	7.83073	7.70337	7.74256	8.01015	7.79245	8.2201	7.8675	9.42619
rna-NM_001347386.1	7.10986	7.54283	7.53006	6.77133	7.15154	6.1667	6.62901	7.03778	6.71088
rna-NM_023372.3	4.24116	5.49584	4.76718	5.40111	4.69672	4.95986	4.61687	4.32421	5.3819
rna-XR_380392.4	4.70787	7.39791	4.71783	4.94095	4.84747	4.69402	6.98817	4.82154	5.83701
rna-NM_001029878.2	6.93708	7.17121	7.43827	7.87607	8.14179	7.54769	8.10903	8.25851	6.50407
rna-NM_011446.1	8.54284	8.54862	8.69348	9.1673	8.61766	8.07903	7.98401	7.24461	6.97987
rna-NM_001311068.2	7.35063	8.91034	6.91246	7.58862	6.59913	7.6529	6.44992	6.78261	6.46939
rna-XR_004938979.1	9.94913	10.3081	10.1402	9.76744	10.2356	9.98436	10.1657	10.197	9.7478
rna-XM_030247596.1	6.38263	5.82273	6.62051	6.25681	6.67356	6.45513	6.64098	6.71447	6.45173
gene-Gm8692	6.48443	6.17928	6.44162	7.02336	6.54726	6.1667	6.66461	6.55197	6.15615
gene-Gm6311	6.23992	6.80409	6.35744	6.52313	5.96699	5.84374	5.51393	5.75087	5.94326
rna-NM_007505.2	11.6583	12.2106	11.8506	11.8802	11.5495	11.5209	11.5127	11.3297	11.4964
rna-XM_011246470.4	7.87596	4.46888	4.66624	4.07087	8.33626	4.58973	8.04341	3.17337	8.27172
rna-NM_001368697.1	7.00677	6.28733	6.95105	6.22189	5.27997	6.57988	6.56762	7.22522	6.83824
rna-NM_001378844.1	5.15302	7.81656	7.62825	7.80796	6.66142	7.81276	7.8212	5.33006	7.97984
rna-NM_030238.2	9.82025	10.0007	10.3593	10.1799	9.82093	9.75988	10.0974	10.3839	10.5122
rna-XM_006527078.5	5.03566	3.17337	4.86001	5.7156	4.93822	3.17337	4.72283	3.17337	4.35533
rna-NM_008599.4	9.36837	10.5898	10.5018	9.36171	5.81951	3.17337	5.66612	5.43962	5.72183
rna-XM_006517175.2	6.15387	7.26832	5.102	5.8606	5.40678	5.67166	5.80291	4.82154	5.26022
rna-XM_011243456.4	7.38834	3.17337	5.93935	6.97223	6.15368	6.93697	5.17935	6.00403	6.89138
rna-NM_020507.3	8.66435	8.61147	8.85402	8.44175	8.34004	8.40071	3.17337	9.16401	7.93015
rna-NM_001358007.1	9.65268	9.90865	10.0258	9.51712	9.81686	10.024	9.74137	9.66662	9.47892
rna-NM_138591.2	7.21444	6.94161	6.79003	6.50878	7.38252	7.19157	6.9407	6.71447	6.87828
rna-NM_007598.5	5.6448	4.95273	4.43143	5.03027	4.45775	5.62501	4.61687	5.12402	4.92094
rna-XM_036164746.1	3.17337	5.3389	8.61497	8.63415	4.45775	8.5104	3.78302	4.98211	8.10265
rna-NM_001379243.1	6.06217	5.20745	6.17225	5.60957	5.46587	5.36376	4.72283	5.12402	4.67376
rna-XR_003950838.2	5.5098	5.29655	3.7809	5.22905	6.37913	5.52657	6.07738	6.36837	6.24125
rna-XM_006499440.5	5.42173	5.16047	5.50709	5.55325	5.60305	5.36376	5.07071	3.17337	5.596
rna-NM_053157.2	7.65892	7.0057	7.3109	7.29681	7.73321	7.97476	7.67276	7.6883	7.17438
rna-XM_011247829.4	3.17337	4.70185	3.17337	4.17295	6.42308	5.30469	6.1802	6.19803	6.08874
rna-NM_001037761.2	5.83618	6.06218	7.35463	7.44639	6.34906	7.0951	6.84074	8.48673	3.17337
rna-NM_001361971.1	3.17337	6.03753	3.17337	7.10154	7.65019	7.55977	4.72283	3.17337	3.17337
rna-XM_006540098.5	4.70787	6.2235	4.3634	6.9826	4.6417	4.47435	5.03231	5.29141	4.80388
rna-XM_036157005.1	7.10079	7.13732	5.102	6.16782	7.72744	7.57174	7.53933	6.95768	5.26022
rna-NM_027901.2	8.88301	8.20706	8.77063	8.59767	8.60828	8.81201	8.40558	8.61852	8.06287
rna-XM_030250202.2	7.86532	7.6019	8.32822	8.0823	8.91771	8.30365	8.59756	9.06422	8.01601
rna-XM_006512000.5	8.4815	7.01818	6.06957	7.14831	7.03452	7.28195	6.49025	6.2763	7.45521
rna-NM_015800.3	8.46046	6.1102	6.17225	8.40383	8.29005	7.84271	7.91228	8.14475	8.66228
rna-XM_030252071.2	7.52999	7.06703	7.50443	7.78453	7.06239	6.8006	7.18826	7.07077	7.10871
rna-XM_030249698.1	6.89567	6.30797	6.96995	6.38842	7.24359	6.50636	6.00435	7.09235	7.14192
gene-Gm2534	6.4417	6.03753	5.79555	6.63297	5.46587	6.28926	6.16358	5.72278	4.97545
rna-NM_025959.3	7.46797	7.26832	7.65761	7.06298	6.39393	5.76041	8.00714	6.92194	7.3456
rna-XM_036163222.1	8.15463	8.57409	8.67353	8.02348	7.23547	7.51083	6.96937	7.01535	7.46398
rna-XM_030249057.1	3.17337	9.61155	10.3094	10.451	10.4068	3.17337	9.84248	10.8787	10.9927
rna-XM_006531827.5	6.30514	6.0864	5.9197	6.7593	6.67356	6.64977	6.16358	7.10302	4.86385
rna-XM_036155650.1	9.55851	9.36159	9.48068	9.80718	9.96994	10.0858	10.1871	10.135	10.2341
rna-NR_040642.1	5.9227	5.4197	5.81703	6.65915	6.1361	6.28926	6.09505	6.0936	6.08874
rna-NM_178777.3	5.07601	5.3389	5.13811	5.19171	5.06277	5.30469	5.4019	5.25156	4.97545
rna-XR_004936019.1	4.95077	5.90724	5.48001	5.19171	5.72753	5.10927	5.54052	5.36761	5.75155
rna-XM_017316565.1	5.61886	5.49584	5.33561	5.15325	5.24624	4.95986	5.27944	5.07849	3.17337
rna-XM_017313681.2	6.20613	6.61935	5.93935	6.25681	6.22187	5.80271	5.73623	6.2952	6.71088
rna-NM_026565.3	5.83618	5.4197	5.89977	5.76566	6.31832	5.80271	5.78105	5.29141	6.06553
rna-NM_001163780.1	6.02373	3.17337	3.17337	5.33499	3.17337	3.17337	5.54052	7.32875	6.87828
rna-NM_001205095.1	6.13601	5.16047	5.17321	5.07262	6.20513	5.80271	6.04135	6.55197	6.75461
rna-NM_145511.2	7.41781	6.61935	7.58	7.18467	7.66839	3.17337	7.32741	7.60087	7.56522
rna-NM_178407.3	8.23533	7.89283	8.38542	8.72611	9.4336	9.19095	9.25224	9.46722	8.99664
rna-NM_025864.4	7.17179	5.9343	6.85256	6.80685	7.33008	7.91025	7.75711	7.63795	7.21655
rna-NM_001370901.1	6.98721	7.6019	7.64594	7.43136	7.30701	6.8006	7.45424	7.7301	6.41572
rna-XM_036166059.1	5.15302	5.63621	8.10798	5.88335	5.10166	7.92898	5.14416	8.63326	7.40145
rna-NM_026664.4	7.67729	7.72086	8.01132	7.73647	7.86526	7.04431	7.91228	7.60087	7.92382
rna-NM_025668.3	10.505	10.2606	9.87674	10.2563	10.2687	10.2621	10.3213	10.1945	10.5932
rna-XM_006515027.5	5.03566	8.46485	6.69076	7.60879	5.24624	7.11164	7.08736	7.42531	8.87401
rna-NM_008220.5	6.09958	9.52716	8.39241	9.96385	8.01015	6.89932	7.02504	7.32875	6.91723
rna-XM_036154877.1	7.11887	6.74514	6.85256	5.92774	6.47962	7.11164	7.04312	6.84763	6.83824
rna-XM_030254839.2	5.9227	6.46307	6.71343	6.67206	5.72753	5.47449	6.05948	6.55197	5.86435
rna-XM_011242735.4	7.81643	8.10587	8.88656	6.23946	6.39393	4.69402	6.78801	5.88327	7.25751
rna-NR_002688.1	7.8492	8.40933	8.45386	7.78453	7.48883	7.54769	7.66696	7.3378	8.11382
rna-NM_011018.3	11.1171	12.419	11.8847	12.0514	10.8523	10.6952	10.5431	10.5348	11.0322
rna-NM_001359916.1	6.36747	5.53233	5.20737	5.8606	5.96699	5.84374	5.8665	6.42085	5.89116
rna-XM_036157927.1	7.57644	7.81656	6.29838	6.7101	7.10766	7.88169	5.75882	6.17776	5.62857
rna-NM_020561.2	7.28014	7.41684	7.67494	7.26323	8.62388	8.65228	8.46691	7.99862	8.44527
rna-NR_002862.3	5.76752	6.01243	5.97782	6.11157	5.70353	5.30469	5.92727	5.98071	6.34083
rna-XR_004937409.1	6.61821	6.36816	6.80065	6.56532	6.62438	6.60356	6.58011	6.35043	6.89138
rna-NM_175149.4	9.63714	9.35426	9.00759	8.72918	9.65625	9.49075	9.63857	9.22851	9.25028
rna-XM_006510802.4	8.86712	8.79595	8.99616	8.5429	9.04832	8.96034	9.48077	9.12544	9.43733
rna-XM_006530806.4	6.89567	6.76011	5.58519	6.87532	3.17337	3.17337	5.78105	7.68122	7.01617
rna-NM_023047.3	5.9842	5.70126	5.83819	6.23946	6.1361	5.76041	5.31115	6.33226	4.97545
gene-Gm4834	4.76065	4.03729	4.21093	5.5817	4.69672	5.80271	4.12704	4.49144	5.596
rna-XM_030253394.2	5.18983	6.34838	5.72898	5.66362	6.25477	7.31085	5.51393	5.40411	5.66038
rna-NR_165793.2	10.166	9.48304	9.73687	10.4804	8.93032	9.55237	9.18695	8.90329	9.53187
rna-XR_001779958.3	6.52591	6.0864	6.79003	5.97075	7.21907	6.86065	6.95988	7.48353	7.68249
rna-NM_008828.3	9.59595	9.58883	9.64477	9.10724	7.96182	8.19185	8.0163	8.00997	8.00405
gene-Gm4833	9.14931	9.57629	8.9707	9.36566	9.10722	9.23296	9.18492	8.72557	9.24268
rna-NM_011703.4	5.45174	3.17337	5.65899	5.90572	6.59913	6.3183	6.88157	7.07077	6.87828
rna-NM_026139.4	8.82659	8.37592	8.30987	8.80094	8.84236	8.46624	8.62173	8.61109	8.04548
rna-XM_036158178.1	8.10124	7.33955	7.764	7.99314	8.17184	8.15256	8.23976	8.20522	8.08574
rna-XM_030243379.2	8.03158	8.82806	9.23845	8.65689	8.69356	8.45337	8.56677	9.29721	8.02787
rna-NM_001252662.1	4.32259	4.70185	4.71783	4.84453	4.69672	4.47435	5.03231	4.93092	4.67376
rna-XM_006533332.3	8.85104	5.87964	10.1308	9.52244	9.69958	7.42096	7.16369	4.82154	9.33378
rna-NM_001190401.2	8.7126	8.1404	8.40975	8.92389	9.01558	8.28923	8.92823	9.23577	9.37609
rna-XR_379106.3	7.39576	6.6357	7.15469	6.0923	7.61933	7.12799	7.38516	7.20556	7.81849
rna-XM_030249767.2	4.39761	6.1102	5.9197	5.66362	5.75111	6.95543	4.6711	6.45479	5.91745
rna-XM_006497672.4	5.03566	5.00801	5.17321	5.26533	5.31285	5.10927	4.99267	5.33006	5.30205
rna-XM_036160711.1	5.964	6.06218	6.15565	6.53733	6.37913	6.62685	6.44992	8.36835	5.89116
rna-NM_023049.1	6.00411	5.53233	5.63484	5.52418	7.06239	7.55977	7.45424	7.27321	7.69743
rna-XR_004937239.1	3.17337	3.17337	4.61215	6.38842	6.11829	5.47449	5.51393	7.99862	3.17337
rna-NM_001165991.1	7.34297	6.98041	6.90265	6.96178	6.17104	7.43415	7.38516	7.32875	7.3456
rna-NM_021556.3	7.74274	8.44658	8.3355	7.12979	7.68636	7.23747	7.60152	7.46714	7.53226
rna-NM_175247.3	5.67024	5.3389	5.17321	3.17337	5.40678	4.87771	5.71326	5.5408	4.67376
rna-NM_025895.4	10.0143	9.77964	9.54324	9.86829	10.1205	10.2768	10.3712	9.96336	10.562
rna-NM_023878.3	6.09958	4.89481	6.86272	6.25681	6.50706	6.57988	6.99748	7.17557	4.60262
rna-NM_001289634.1	6.5529	7.25785	4.43143	6.81849	7.11655	7.6973	6.73324	4.41131	7.26756
rna-XM_036156762.1	8.47801	8.77414	8.66778	8.09188	8.80999	8.6181	8.94029	8.8972	8.76142
rna-NM_011594.3	11.5242	11.6974	11.7867	11.5515	11.9832	12.2359	12.2532	12.0784	12.9244
rna-XM_006498860.4	5.07601	4.55224	4.43143	4.68323	5.06277	11.2999	4.49957	11.1331	5.596
rna-NM_001362918.1	6.17151	6.36816	6.57166	6.77133	6.97711	6.8006	6.69934	7.04886	7.43752
rna-NM_027514.2	9.3341	9.06202	9.20311	9.2908	6.56041	6.53129	6.2289	6.62815	7.24737
rna-XM_030242508.2	7.00677	7.74352	7.2658	6.86413	7.63176	7.39422	7.37807	7.37345	7.05158
rna-NM_031195.2	8.32732	7.90627	8.07793	6.86413	5.49446	5.17779	5.21359	5.50792	5.17224
rna-NM_183308.3	9.80781	9.31201	9.40667	9.23793	9.22442	9.45248	9.28476	8.91239	9.38993
rna-XM_030245740.2	7.6403	6.78958	7.67494	7.54741	3.17337	8.28923	8.76695	8.59612	7.68249
rna-XM_006501289.4	8.24766	6.91515	6.88283	7.56128	6.82256	8.8664	8.31211	7.70935	8.60806
rna-XM_036152433.1	4.76065	4.76979	4.43143	4.5613	4.69672	4.34441	4.55982	5.43962	4.60262
rna-XM_017317726.2	7.76582	7.43553	7.06969	7.35375	7.36028	7.64159	7.61364	7.62324	7.4196
rna-XR_003955646.2	8.01723	6.6357	7.67494	7.6483	8.87663	8.92349	8.84601	8.66947	8.90646
rna-NM_001310473.1	6.081	5.82273	6.01525	5.40111	5.7743	3.17337	5.31115	5.93285	5.52838
rna-NM_027014.1	5.32735	5.53233	5.02651	4.62395	5.34491	5.03682	4.36739	4.76279	5.45716
rna-NM_183286.2	5.1151	3.17337	3.17337	4.4237	4.74919	5.10927	4.77232	4.98211	4.92094
rna-XM_036161589.1	5.22561	4.62958	5.102	5.07262	3.17337	5.2428	5.14416	5.80537	3.17337
rna-XM_011239800.2	7.28815	7.78778	4.49518	7.63525	7.92699	5.17779	7.61364	7.49974	7.42858
rna-XM_036153970.1	6.64352	6.0864	5.42413	5.94941	6.28691	6.34675	6.62901	5.63485	6.52109
rna-NM_007806.3	10.378	10.7695	10.4298	10.4612	9.69811	9.68207	9.86922	9.39772	9.62255
rna-NM_008467.4	9.14712	8.3951	8.70195	9.0544	8.86879	8.88569	8.83313	8.84434	9.43511
rna-NM_172499.2	5.81368	3.17337	4.76718	4.73954	5.60305	5.71676	5.4019	5.29141	5.94326
rna-NM_201226.1	8.70068	9.46728	8.94002	8.237	7.78971	8.1684	8.61272	8.70129	8.08006
rna-XM_036160618.1	7.88652	6.61935	6.77934	7.85373	4.69672	8.04511	8.73408	4.63543	4.92094
rna-XM_011246551.4	6.04309	6.69926	6.73574	6.94065	4.58382	4.47435	4.49957	5.6941	3.17337
gene-ATP6	9.61828	10.4106	10.2635	11.7806	9.62713	9.84112	10.2211	10.5289	11.6789
rna-XM_006508100.3	5.90157	4.03729	4.29027	5.22905	6.20513	6.57988	6.78801	6.53623	6.61916
rna-NR_040311.1	6.49839	6.83268	5.70605	5.94941	6.43743	6.42881	6.26046	6.43793	5.596
rna-NM_001362172.2	7.87596	3.17337	3.17337	5.11358	4.6417	7.35314	4.43563	4.32421	5.07771
gene-Rpl10-ps1	9.10256	9.03171	8.99386	9.25719	8.67571	8.90471	8.83054	8.39021	8.40947
gene-Rpl10-ps3	11.3612	11.4918	11.1396	11.503	10.9208	11.0017	11.0103	10.6802	10.8315
gene-Rpl10-ps6	10.5595	10.5772	10.3131	10.816	10.1369	10.2895	10.2943	9.76691	9.88762
rna-XM_036155063.1	3.17337	7.38834	7.58	4.68323	7.43312	8.325	7.55827	3.17337	8.47154
rna-NR_033430.1	6.081	4.37817	6.20486	4.94095	5.86329	4.95986	5.96635	6.59817	5.02764
rna-NM_011877.2	6.96736	7.0057	6.60845	6.13057	6.63683	6.45513	6.49025	7.01535	6.74018
rna-NM_011859.3	3.17337	3.17337	3.17337	3.17337	5.24624	5.84374	4.86539	5.72278	5.62857
rna-NM_001285920.1	8.95747	8.82452	3.17337	8.81545	9.19548	8.90471	9.0512	9.16654	8.52687
rna-NM_007408.3	10.538	9.8885	9.49048	4.62395	8.1971	3.17337	8.53212	7.76402	8.27172
rna-NM_007906.3	10.4258	10.9738	10.8376	11.3106	10.9539	11.0355	11.0313	11.0831	10.6149
rna-NR_149323.1	5.67024	4.95273	3.17337	5.07262	4.69672	5.30469	5.03231	4.56584	3.17337
rna-NM_010252.4	5.74385	6.44459	5.58519	5.5817	6.1361	6.1343	6.79871	6.68628	5.34258
rna-NM_001359097.1	9.86894	3.17337	10.575	10.4332	10.3544	10.4775	10.3424	10.6297	10.2831
rna-NM_178227.4	6.77517	6.38766	5.39528	5.63686	5.27997	6.75911	6.83035	6.68628	4.14706
rna-NM_138595.2	4.76065	3.17337	5.81703	4.49476	5.37621	4.95986	5.61728	6.25713	4.97545
rna-NM_009574.3	9.6998	9.7427	9.73412	9.01471	10.5966	10.1085	10.2524	10.2081	9.72069
rna-XM_036158829.1	6.74046	6.26637	6.35744	6.50878	6.64918	6.8006	6.83035	7.02661	6.90436
rna-XM_006526241.3	5.90157	5.06093	4.94611	5.63686	5.70353	5.67166	5.90731	6.00403	5.12586
rna-XM_017318594.3	3.17337	3.17337	4.29027	5.07262	4.74919	5.03682	3.17337	5.25156	4.97545
rna-NM_031997.4	6.32099	6.60282	8.09518	8.25415	5.79709	6.84091	7.1387	6.04954	6.13404
rna-XM_011249151.4	7.21444	7.89283	6.72463	6.67206	7.33769	7.54769	7.53296	6.6429	7.69743
rna-NM_011803.2	12.1241	13.4861	13.1059	12.361	10.3088	10.0219	10.589	10.6624	11.4975
rna-NM_010478.2	7.62144	8.93348	9.16892	8.85251	6.59913	6.03234	6.33638	7.42531	6.86506
rna-NM_001355011.1	4.95077	5.06093	4.90383	4.98643	4.45775	8.68016	4.90933	4.56584	4.52652
rna-NM_138753.2	9.00908	9.32456	9.35394	9.41794	9.24877	8.89523	9.24448	8.91841	9.36213
rna-NM_144804.2	3.17337	3.17337	5.06483	5.46408	3.17337	5.2428	5.96635	5.60423	5.89116
rna-NM_153562.4	8.29202	7.28904	7.5364	8.16627	8.38836	8.28923	8.03443	8.73243	8.23127
rna-NM_028542.1	8.23533	8.08238	8.58171	8.341	8.48382	8.43384	8.42631	8.73243	8.10265
rna-NR_015473.1	6.11791	6.06218	5.85902	7.02336	6.95744	6.60356	6.27597	6.8976	7.09746
rna-XM_030252744.2	6.17151	7.23668	6.63246	6.86413	6.43743	6.3183	6.74437	6.17776	3.17337
rna-XR_004934131.1	4.53271	3.17337	3.17337	4.68323	5.176	3.17337	4.81978	5.90828	5.34258
rna-XM_036165586.1	4.85951	5.79336	5.13811	3.17337	5.10166	5.42029	4.99267	5.57289	6.50407
rna-XM_036154245.1	9.33024	9.54444	5.85902	7.76669	5.46587	9.65424	5.71326	8.58479	7.89172
gene-Gm5297	6.66838	6.78958	6.45518	6.94065	6.1361	6.42881	6.36563	6.0936	7.36446
rna-NM_133229.2	5.964	6.91515	6.67929	5.79002	6.72109	6.45513	6.5925	6.00403	6.61916
rna-NM_007447.3	4.05162	6.88818	6.41412	6.41948	7.14287	7.22234	4.61687	5.85779	8.39124
rna-XM_011248379.4	5.964	6.20157	6.53389	6.52313	6.22187	6.50636	6.99748	6.90982	7.09746
rna-NM_025411.4	8.01242	9.01631	8.83105	8.09664	8.35134	8.51659	8.40906	8.14989	8.36344
rna-XM_036155857.1	4.70787	3.8822	4.55526	4.34724	4.79936	5.10927	5.24693	5.16797	4.67376
rna-NM_027497.3	7.38834	6.65186	6.70214	7.26323	7.86526	7.40765	7.7071	8.02123	7.4727
rna-XR_003950154.2	4.85951	5.00801	5.102	5.11358	4.04487	3.17337	3.17337	5.50792	3.17337
rna-NR_045611.1	3.17337	5.70126	3.17337	7.43889	3.17337	7.29647	6.83035	3.17337	6.78303
rna-XM_017317854.2	3.17337	10.1882	12.2316	10.494	3.17337	3.17337	9.21897	9.94871	11.0642
rna-XR_004941289.1	9.03065	6.34838	3.17337	7.71182	4.04487	6.69452	9.85145	7.40823	5.52838
rna-XM_030241947.1	7.83836	3.17337	7.1711	3.17337	6.91728	6.86065	7.15541	6.82198	6.24125
rna-NM_175364.4	7.85997	6.60282	7.16292	7.50498	8.05231	8.21491	8.02992	7.81669	8.02787
rna-NM_001082960.1	8.35038	8.00953	8.12068	8.0823	9.12048	9.18707	8.68618	8.97447	10.4096
rna-NM_028469.3	5.32735	4.95273	5.02651	5.74086	4.52266	5.03682	4.12704	4.41131	5.66038
rna-XM_006514326.3	4.76065	6.56915	6.29838	7.03337	7.08067	6.42881	6.92126	6.79585	7.18504
rna-XM_011240592.4	6.5529	6.1102	7.76939	8.28369	8.33246	6.53129	8.66598	8.38151	3.17337
rna-XR_003955636.1	8.44269	7.31956	6.92221	8.52182	8.12433	8.00154	8.23585	8.49886	8.17375
rna-XM_006523676.5	12.4463	11.9931	11.2169	12.8817	9.05063	7.92898	11.3928	10.0121	10.267
rna-NM_173028.4	5.48108	5.98687	5.39528	5.36847	5.65422	5.47449	5.4019	6.72836	6.52109
rna-XM_030254373.2	5.42173	5.53233	5.39528	4.94095	5.86329	6.1667	5.5666	5.63485	5.3819
rna-XM_036166087.1	6.90613	6.73001	6.41412	7.54741	7.48883	7.39422	7.78416	5.33006	7.46398
rna-NM_021402.6	5.1151	9.70286	5.20737	4.89371	5.24624	5.71676	5.31115	5.88327	5.49325
rna-NM_178794.4	8.61443	8.9203	9.06777	7.94639	8.33626	8.19185	8.0744	8.03795	8.66608
rna-NM_001033430.4	8.22288	8.08829	7.03422	8.13882	8.35882	8.19958	8.53531	8.71175	7.992
rna-XM_006538830.2	5.03566	5.25277	5.63484	5.33499	4.58382	5.36376	4.72283	4.82154	4.60262
rna-XM_036159291.1	7.39576	8.22862	8.38191	7.54042	8.10221	7.82282	8.49662	8.53463	7.45521
rna-XM_017317466.3	6.8638	6.0864	6.88283	5.83748	6.08198	6.89932	6.07738	5.83183	6.7256
rna-XM_006510825.4	8.57582	8.38074	8.96836	9.19197	9.41041	9.33467	9.49064	9.56845	9.57893
rna-XM_036162742.1	9.8596	9.27884	9.35394	9.36763	9.11387	9.24047	9.32026	9.47543	9.07867
rna-XM_030251460.1	5.03566	5.00801	4.55526	3.17337	4.58382	3.17337	5.17935	4.56584	6.24125
rna-XM_006520258.5	5.90157	5.45832	5.68273	4.79322	6.20513	5.9223	6.14676	5.57289	5.75155
rna-XM_006524723.4	6.39763	5.76335	5.87955	5.79002	6.28691	5.10927	6.02297	6.2763	6.06553
gene-Rpl31-ps14	7.35063	7.72846	7.31828	7.42378	7.25971	7.46017	7.39222	6.87283	6.99207
rna-NM_178668.3	6.76369	7.52549	7.47173	6.65915	6.40858	6.22932	6.29132	6.58293	6.01791
gene-Rpl31-ps10	7.06392	7.48122	7.39706	7.26323	6.95744	7.06144	7.05208	6.58293	6.85171
rna-NM_011707.2	6.82018	6.20157	6.32822	6.35665	7.14287	7.28195	7.07862	8.35507	7.80477
rna-NM_001313695.1	8.57908	7.26832	7.53006	7.51926	7.08067	7.33918	7.33476	6.48793	7.19562
rna-XM_011249508.3	6.04309	6.96759	6.66773	3.17337	3.17337	8.33907	6.21286	6.19803	3.17337
rna-NM_023374.4	10.1725	10.5379	10.1932	10.139	9.72295	9.08651	9.84761	9.49169	10.0061
rna-NM_011249.2	6.76369	4.70185	5.63484	5.76566	6.8334	6.10114	6.66461	6.2952	6.8109
rna-XR_867210.4	5.74385	5.60247	3.17337	5.36847	6.52059	6.64977	6.58011	4.63543	6.04192
rna-XM_036161066.1	3.17337	7.6346	5.93935	8.59767	7.45426	7.58362	6.74437	8.62222	8.63542
rna-XM_030255546.2	8.78489	7.33955	7.98379	7.50498	8.6485	8.61232	8.76424	3.17337	9.85807
gene-Gm2962	8.47801	8.55716	8.08658	8.1753	8.35134	8.12034	8.08748	7.7573	8.00405
gene-Gm9008	6.64352	6.6357	6.63246	6.18607	6.11829	6.60356	6.39429	6.25713	6.34083
rna-XM_030244835.2	7.77153	6.88818	6.20486	6.41948	7.06239	7.70819	7.35658	6.31385	7.00417
rna-NM_026558.5	5.85833	6.58608	3.60453	5.74086	5.84157	5.99662	5.80291	4.41131	5.69145
rna-NM_133853.3	7.41781	6.60282	4.76718	7.26323	7.13415	7.20704	6.74437	6.59817	7.6674
rna-NM_010380.3	14.3892	14.4953	14.1257	13.4903	12.1848	12.4289	12.1982	11.6816	13.1367
rna-NM_001349093.1	5.71975	5.79336	5.89977	6.2041	7.07156	6.71638	7.04312	6.67197	7.18504
rna-NM_011787.2	6.74046	6.6357	6.85256	6.61969	6.9965	6.91827	6.29132	6.8976	7.17438
rna-NM_016898.2	10.522	11.0664	11.0667	11.4167	11.0326	11.2873	11.1529	11.0409	10.6877
rna-XR_390317.5	7.49587	7.43553	3.17337	6.49428	6.80063	3.17337	5.14416	3.17337	7.35506
rna-XM_036159225.1	8.62077	8.86291	8.8816	7.9411	7.17724	8.12034	7.32741	7.77737	7.74133
gene-Gm29257	7.63404	8.08238	7.93191	8.1249	7.56855	7.46017	7.72396	7.48353	7.80477
gene-Smarce1-ps1	6.27291	7.22597	6.67929	6.63297	6.34906	6.1343	6.24477	6.04954	6.78303
rna-XM_011242679.3	4.95077	4.46888	5.13811	4.5613	5.60305	5.88358	5.3421	6.35043	6.30184
rna-XM_006510466.4	3.17337	3.17337	4.94611	3.17337	5.49446	6.10114	6.50345	6.74212	6.75461
rna-XM_011248860.3	5.18983	3.17337	7.27341	3.17337	7.4402	4.47435	4.86539	3.17337	7.45521
rna-NR_160678.1	6.52591	5.3389	6.80065	5.97075	6.23842	6.19836	6.21286	6.80898	6.19934
rna-XR_001783686.3	3.17337	6.28733	6.26789	6.3405	3.17337	6.34675	3.17337	6.15719	3.17337
rna-NM_029012.2	6.20613	4.27823	4.71783	6.86413	5.52244	6.71638	6.38004	9.02843	5.78063
rna-XM_036160104.1	3.17337	5.37992	7.61634	8.66011	4.79936	3.17337	3.17337	3.17337	8.49307
rna-XM_006504268.5	7.27209	7.61835	7.75316	7.8253	8.26239	8.01036	7.98867	8.10827	8.01005
rna-NM_001301269.1	8.12373	8.65588	9.12554	8.04335	8.15044	8.18407	7.9414	8.20522	7.45521
rna-XM_006519714.1	6.25651	6.65186	7.75316	6.07277	5.2116	7.48572	7.90244	5.36761	4.35533
rna-NM_145943.1	8.5159	9.27367	9.14222	8.77148	8.31718	8.18407	8.25143	8.3053	8.78256
rna-NR_033133.1	9.20727	4.46888	5.02651	8.45293	8.5243	3.17337	8.07878	8.24897	8.13041
rna-XM_006522653.4	7.03563	7.48122	7.12971	7.14831	7.05316	7.23747	7.23616	7.55508	7.32648
rna-XM_006511456.4	4.32259	5.16047	4.98697	5.22905	3.17337	3.17337	3.17337	5.50792	6.17791
gene-Gm9826	5.48108	5.49584	5.45236	5.30063	4.98115	4.87771	4.6711	5.40411	4.97545
rna-XM_006526230.2	7.76008	6.48132	7.87809	8.33296	5.65422	8.45982	7.48096	6.52031	7.13093
rna-NM_010284.3	6.60539	5.29655	5.99666	5.97075	6.39393	5.52657	6.47694	6.21801	5.96859
rna-XM_030245800.2	8.25583	7.72846	7.80654	7.05318	8.48382	7.52322	5.8665	7.17557	8.22614
rna-XM_006530330.5	6.80906	6.80409	5.55966	7.15749	5.84157	4.01246	6.00435	6.35043	6.19934
rna-NM_011579.3	11.6721	9.54014	9.95317	10.8317	7.86526	7.23747	7.44069	6.6429	7.58142
rna-XR_004940339.1	7.60873	7.91295	7.41781	8.1753	7.92195	7.91025	8.20017	8.92442	7.61328
rna-NM_026734.2	5.71975	4.76979	5.77372	5.22905	5.46587	5.9223	5.6899	5.29141	5.66038
rna-NM_173419.2	4.65251	5.37992	4.66624	4.62395	5.10166	3.17337	4.77232	5.16797	5.07771
rna-NM_001081295.1	6.15387	6.15663	6.18865	6.23946	5.84157	5.99662	5.66612	6.68628	6.13404
rna-NM_001359945.1	7.4105	7.48122	7.1711	7.22884	5.90571	6.37464	6.56762	5.5408	5.69145
rna-NM_001359486.1	6.22312	7.93934	9.03017	8.00332	6.61181	7.719	7.43386	6.40358	4.60262
rna-NM_027307.4	9.40736	8.59497	8.9519	9.65256	9.99295	10.4886	10.2601	10.0943	10.1567
rna-NM_007802.4	3.17337	4.62958	5.02651	3.17337	5.34491	5.03682	5.92727	5.50792	4.67376
rna-NM_008251.3	10.1573	10.2619	10.2394	9.80136	9.95152	10.2114	10.0131	9.64679	10.1322
rna-NM_028411.4	6.11791	5.79336	5.99666	6.01246	6.0447	6.3183	6.00435	6.42085	6.08874
rna-NM_013551.2	6.84216	6.48132	6.13886	6.41948	6.68559	6.10114	6.4635	5.98071	6.26174
rna-XM_006507440.5	8.72441	7.80224	6.5963	8.11554	7.95196	8.14457	8.32689	7.53949	8.63155
rna-NM_025755.3	5.59241	5.25277	4.76718	4.49476	5.10166	5.71676	5.3421	5.29141	5.69145
rna-XM_006508619.4	5.42173	4.16621	4.66624	3.17337	5.2116	5.42029	5.51393	5.25156	5.45716
rna-XM_006517283.3	5.88012	5.29655	4.61215	4.89371	6.85484	5.71676	6.47694	6.84763	6.13404
rna-XR_004934820.1	7.89701	4.83395	7.19537	7.40851	7.49565	7.52322	7.36378	7.28262	7.10871
rna-XM_036161155.1	7.27209	6.77492	6.46861	6.3405	7.36774	7.43415	7.69003	7.44219	7.74133
rna-XM_030244154.2	6.04309	7.0057	6.88283	8.04828	7.43312	7.25245	7.14708	8.34615	7.48136
rna-NM_001113558.2	4.99395	3.17337	3.17337	5.40111	4.52266	5.84374	5.27944	3.17337	5.21698
rna-XM_017318246.3	6.57939	6.20157	5.93935	6.97223	6.67356	7.12799	6.64098	7.85496	6.89138
rna-NR_030733.1	4.39761	7.01818	5.95872	5.74086	4.8937	4.58973	5.78105	4.87748	5.21698
rna-NM_010721.2	8.24766	8.61965	8.47707	8.90502	7.75608	7.95662	7.76256	7.98718	7.32648
rna-XM_017312860.3	6.45609	5.85148	5.75153	6.29089	5.88466	6.06716	5.88706	5.83183	5.17224
rna-NM_001357521.1	7.43952	7.80942	5.9197	7.31331	5.43665	7.72972	7.80015	7.43377	7.19562
rna-NM_001360844.1	8.69169	5.00801	8.33186	4.79322	8.53093	8.61232	4.99267	8.35507	8.14137
gene-Gm12666	6.06217	5.56786	5.42413	6.23946	5.96699	5.36376	5.94695	5.21045	6.37878
rna-NR_165074.1	6.30514	6.71472	6.98861	7.68041	6.23842	7.38066	5.37234	7.84232	6.61916
rna-XM_006506056.4	7.06392	6.0864	6.15565	6.87532	7.68039	7.67527	7.92205	7.77071	7.79785
rna-NM_033570.2	6.53947	6.40689	6.20486	6.30762	6.49341	5.57669	5.66612	6.65751	6.04192
rna-NM_001364946.1	6.081	6.42587	6.01525	5.52418	5.84157	6.3183	5.6899	5.83183	6.46939
rna-NM_138601.3	8.72441	7.40741	8.25337	8.3003	8.58296	9.15167	8.68904	8.63692	8.80683
rna-XM_030241992.2	4.76065	3.17337	5.13811	4.4237	4.74919	5.71676	5.03231	5.80537	5.21698
rna-XM_006517189.4	9.25284	6.95466	4.29027	8.39613	8.92529	9.46214	4.21445	9.37379	7.5239
rna-XM_006538495.4	8.16768	7.25785	7.13809	8.1798	8.82357	9.02263	8.79113	9.16907	8.77555
rna-NM_133727.2	6.11791	3.17337	5.9197	6.0923	6.80063	5.95996	6.44992	6.67197	5.99347
rna-NR_168716.1	3.17337	4.27823	4.71783	4.98643	4.93822	4.78948	3.17337	6.43793	4.86385
rna-NM_029394.4	7.06392	7.90627	7.64594	6.81849	7.30701	6.99165	7.32741	5.25156	7.06319
gene-Gm42162	9.16239	9.25542	9.17906	9.31959	9.12048	9.10308	9.12912	8.99744	9.11522
rna-XM_030246026.1	8.19342	7.75843	8.26103	8.34901	8.11993	7.74037	7.99331	8.39455	7.8253
rna-NM_010872.3	7.90742	6.65186	6.17225	6.9929	7.38986	7.87204	7.65528	7.35574	8.05709
rna-NM_028597.3	8.94742	9.84035	9.10654	8.14803	7.99102	8.35991	8.08748	7.95818	8.37741
rna-NM_001168304.1	6.081	6.06218	6.01525	3.17337	7.32243	7.74037	7.89253	7.24461	7.11986
rna-NM_001081971.1	5.74385	4.95273	5.33561	5.19171	6.25477	5.99662	6.2289	5.88327	5.45716
rna-NM_001290762.1	6.656	6.03753	6.53389	3.17337	7.04387	6.75911	6.67628	3.17337	3.17337
rna-NM_024188.6	10.747	10.3056	10.398	10.9176	11.5961	11.345	11.7091	11.7739	11.4349
rna-XM_006518469.5	6.45609	6.53467	6.41412	7.22884	5.7743	7.16013	7.02504	7.51577	5.94326
rna-XM_030255708.2	8.08757	8.19616	7.95099	8.25841	8.06151	8.33907	8.46022	7.41679	8.52269
rna-NM_001290413.1	3.17337	6.03753	5.68273	6.05295	6.06347	3.17337	6.24477	5.80537	5.83701
rna-NM_177344.3	6.95734	7.26832	7.17923	6.52313	6.74427	6.86065	6.64098	6.59817	6.60328
rna-NM_013831.4	6.22312	5.79336	5.65899	6.23946	3.9309	5.52657	5.43081	3.17337	5.62857
rna-XM_036152322.1	5.26042	6.60282	4.29027	4.17295	4.58382	4.78948	4.81978	4.93092	5.02764
rna-XM_011242391.4	7.23943	3.17337	5.53363	8.353	7.03452	7.19157	6.93101	6.8976	5.94326
rna-XM_006505072.4	3.17337	8.25511	9.05461	7.88712	9.57352	7.14415	9.1249	3.17337	3.17337
rna-NM_198001.2	8.85373	8.99133	9.11712	8.71687	8.80178	8.83699	8.81228	8.78947	8.75431
rna-NM_172287.2	5.26042	5.06093	5.33561	5.19171	4.74919	3.17337	5.3421	5.29141	5.26022
rna-XM_036155052.1	5.1151	5.53233	6.0336	5.46408	6.15368	5.30469	6.90155	4.98211	5.45716
rna-NM_001362733.1	10.1939	10.2342	10.0325	10.1573	10.0437	9.89206	10.0537	10.0191	10.4759
rna-XM_006520908.5	4.81112	4.27823	4.90383	5.26533	5.54985	4.69402	5.10797	5.03124	5.56261
rna-NM_001146268.1	5.39102	3.17337	3.17337	5.07262	5.98683	5.80271	5.5666	6.84763	5.42006
rna-XM_017312616.3	5.69522	6.0864	6.0517	6.84149	5.84157	3.17337	5.75882	7.56282	7.4196
rna-NM_010362.3	8.04578	9.34935	8.78398	7.40081	7.61308	7.54769	7.58315	6.98103	7.63672
rna-NM_008210.5	9.65113	10.1322	10.0809	10.0498	10.3886	10.1688	10.0746	9.97063	9.98501
rna-XM_030245455.1	9.10029	8.50072	8.87413	8.61436	8.92277	8.78658	8.87896	8.64785	9.12076
rna-NR_015537.2	5.85833	4.76979	4.12379	5.68986	5.27997	5.42029	6.21286	5.12402	6.01791
rna-NR_045195.1	4.15167	3.17337	4.61215	4.84453	4.79936	5.17779	5.17935	5.43962	5.26022
rna-XM_036157896.1	6.39763	6.20157	6.48191	6.89743	3.17337	6.45513	6.3065	6.99256	6.37878
rna-XM_006505966.2	4.90601	4.89481	4.76718	5.03027	3.9309	4.34441	4.55982	5.12402	3.17337
rna-NM_025327.3	8.21033	9.21283	9.19514	6.86413	9.21415	6.45513	9.47746	7.99862	8.55581
rna-XM_006540592.5	6.35215	3.17337	6.48191	6.9192	7.50243	6.28926	7.17193	5.95699	7.26756
rna-XM_017316660.2	6.27291	6.80409	6.65607	6.3405	6.17104	6.42881	5.51393	6.23771	5.80911
rna-XM_006526340.5	6.93708	7.07899	6.37182	6.53733	6.34906	6.8006	7.2044	6.72836	6.19934
rna-XM_036165682.1	9.48751	10.0116	9.84143	9.79406	9.29433	9.35901	9.50207	8.80583	9.06436
rna-XM_030251026.2	6.94725	6.2451	6.64431	6.46484	6.95744	6.91827	6.67628	7.58577	6.30184
rna-NM_013904.1	3.17337	5.20745	4.76718	3.17337	5.81951	4.01246	4.55982	5.7784	4.80388
gene-Gm7331	9.46833	9.97545	9.7203	9.81875	9.3271	9.3521	9.4541	9.13064	9.20926
rna-XM_006504402.5	7.68942	8.54002	8.55703	7.33771	7.33008	7.25245	7.70143	7.13456	7.39229
rna-XM_030250300.2	5.15302	6.74514	6.77934	5.52418	4.23305	7.48572	4.49957	4.49144	7.36446
rna-XM_036155135.1	9.16022	9.45363	9.41356	9.40648	3.17337	9.67655	9.595	8.26799	7.4196
rna-XM_006497491.4	4.70787	3.17337	3.17337	4.4237	5.49446	5.57669	5.10797	6.04954	4.44451
rna-XM_030254627.1	4.81112	6.58608	6.79003	6.23946	6.34906	7.17594	6.83035	7.31964	6.74018
rna-NR_137283.1	5.9227	4.62958	5.85902	7.56128	5.98683	5.80271	6.56762	6.25713	5.34258
rna-XR_873743.3	8.69169	8.84907	9.0524	9.07142	9.77836	9.62873	9.73585	9.45691	9.77616
rna-XM_017320729.3	7.4105	3.17337	8.85907	3.17337	6.33378	5.67166	3.17337	4.41131	4.74066
rna-NM_013560.2	11.4223	12.2294	11.4977	11.8271	11.5584	11.3169	11.9164	11.4697	12.2169
rna-XR_003952750.1	5.29432	5.56786	5.81703	5.22905	3.17337	5.47449	5.61728	5.80537	3.17337
rna-XM_036156160.1	4.99395	4.83395	4.66624	5.15325	5.02264	4.87771	4.81978	4.98211	5.66038
rna-NM_138651.7	6.35215	7.70556	7.36178	8.36093	8.35882	7.55977	7.88256	7.77071	7.54884
rna-XM_011242696.3	4.65251	3.17337	4.86001	5.26533	4.45775	5.03682	3.17337	5.63485	4.14706
rna-XM_011248292.3	3.17337	6.15663	3.17337	6.95126	7.15154	8.28923	7.02504	8.05996	3.17337
rna-XM_006538500.2	5.45174	3.17337	5.102	4.68323	7.13415	6.8006	6.5423	6.38608	8.27669
rna-NM_001024926.3	6.76369	5.4197	5.87955	6.3405	6.70935	6.42881	6.62901	6.61324	6.92998
gene-Gm14026	5.1151	5.00801	5.02651	5.55325	5.02264	5.2428	5.10797	5.21045	5.56261
rna-NM_001101483.1	6.04309	5.45832	5.53363	5.99176	5.62888	3.17337	5.4019	5.33006	5.45716
rna-NM_001005508.2	8.91944	9.08582	8.82847	8.68877	8.89988	9.27743	9.06007	8.87567	9.72615
rna-NM_023202.4	9.767	10.1786	9.6433	9.878	10.0262	10.1289	10.0459	9.81132	10.5912
rna-NM_016894.3	3.17337	7.48122	7.70337	7.93047	7.50918	7.92898	5.10797	7.7573	7.50704
rna-NM_145576.2	3.93682	8.28628	7.4849	3.95368	4.04487	7.68633	7.32741	7.30125	4.92094
rna-XM_006505104.3	6.39763	5.98687	6.85256	7.08239	7.50243	6.64977	6.40841	8.62591	7.06319
rna-TrnP	7.03563	7.6346	7.31828	6.55139	7.54246	7.53551	7.37094	9.03953	7.43752
rna-TrnQ	6.33665	5.63621	6.22089	6.79511	7.10766	6.86065	7.06098	8.50288	7.54884
rna-XR_004938777.1	7.07323	6.20157	6.40016	7.26323	7.54903	3.17337	4.90933	7.51577	6.65039
rna-TrnT	4.65251	5.16047	4.98697	4.49476	4.98115	4.34441	4.61687	5.7784	4.67376
rna-TrnE	8.05049	8.71813	8.74081	7.49055	7.73321	7.57174	8.08748	8.38151	8.79301
rna-TrnH	5.29432	5.37992	5.17321	5.63686	5.57671	4.87771	5.66612	6.2763	5.80911
rna-TrnI	5.45174	5.79336	5.9197	7.1666	5.96699	6.22932	6.51652	7.65252	6.06553
rna-TrnN	5.35957	6.0864	6.20486	5.7156	5.90571	5.71676	5.92727	7.21542	5.62857
rna-TrnM	6.28912	6.2451	6.13886	6.96178	7.08973	6.8209	7.02504	8.20028	7.58945
rna-NM_001033350.3	4.70787	3.17337	3.17337	4.5613	5.06277	5.67166	5.4591	5.03124	6.08874
rna-NM_021524.2	11.1349	11.1806	10.8554	10.3075	10.2786	10.149	10.4098	9.70025	9.94027
rna-NM_001377000.1	7.06392	7.36903	7.51088	7.51214	5.92644	6.37464	6.19662	7.84232	6.68096
rna-NM_025843.3	9.11158	9.60539	9.32318	9.03964	9.12048	8.94663	8.77775	8.53855	9.27286
rna-XM_030250889.2	4.95077	4.76979	4.29027	5.49447	5.10166	5.52657	3.78302	7.45887	3.17337
rna-NM_030203.2	7.68337	8.39033	8.21838	8.71687	8.83165	8.42068	8.86384	8.04349	8.5599
rna-NM_145443.2	4.70787	5.20745	4.98697	5.5817	5.176	3.17337	5.21359	5.6648	5.49325
rna-NM_011602.5	11.2348	10.9276	10.8189	11.2968	10.8073	10.8687	10.849	10.6214	11.4695
rna-NM_145137.2	4.90601	5.37992	5.102	5.40111	7.09872	6.71638	6.78801	6.80898	6.96756
gene-Rpl19-ps6	6.97732	7.38834	6.96053	7.08239	6.59913	6.78001	6.84074	6.50421	7.0747
rna-NM_013760.4	7.8546	7.46312	7.33293	7.78453	7.5878	7.72972	7.36378	7.55508	7.3456
rna-XM_036158164.1	5.9435	3.17337	5.85902	5.36847	6.3027	6.8006	6.1802	6.04954	5.86435
rna-NR_002445.2	9.43817	9.15776	8.83875	9.13295	9.30598	9.13968	9.14171	8.88801	9.0701
rna-XM_006510019.5	3.17337	5.87964	5.17321	4.68323	5.94687	6.10114	5.51393	5.40411	5.69145
rna-NM_001001179.3	6.00411	3.17337	5.63484	3.17337	6.23842	5.42029	4.99267	4.98211	5.69145
rna-XM_036165660.1	7.40315	7.24731	7.20337	7.34575	6.77835	7.33918	7.12179	6.58293	6.94261
rna-NM_011967.3	8.44269	8.42807	8.53824	8.36489	8.20957	8.18407	7.90244	7.91053	7.4727
rna-NM_009963.4	7.34297	8.37592	7.84786	7.61545	7.6005	8.08739	7.67276	8.09767	6.99207
rna-XM_036152316.1	9.12946	8.28113	7.03422	8.99445	8.55718	8.21491	8.43997	8.6623	8.423
rna-XM_036160747.1	7.55008	7.19337	6.96995	7.26323	6.50706	6.8209	6.76635	6.65751	6.63486
rna-NM_153796.4	5.42173	6.17928	6.01525	5.90572	6.49341	6.40198	5.94695	4.49144	5.30205
rna-XM_006532887.4	9.94913	10.4082	10.6844	10.8732	10.76	10.3514	10.657	10.7554	10.7516
rna-NM_012038.5	10.2744	10.1222	10.5842	9.97293	10.1303	10.4679	10.2659	10.0889	10.1059
rna-XR_876783.3	4.95077	4.95273	5.06483	4.98643	5.40678	5.03682	4.77232	4.63543	4.67376
rna-NM_008376.3	6.66838	4.83395	6.48191	7.77861	7.36774	5.71676	7.71274	6.71447	5.91745
rna-NM_001291001.2	5.29432	6.01243	5.30472	5.07262	5.40678	3.17337	5.17935	5.12402	4.86385
rna-NM_009703.2	7.60233	6.48132	6.20486	3.17337	6.92743	6.89932	7.05208	7.3378	3.17337
rna-NM_009031.3	9.82162	10.0843	10.0369	9.71734	5.37621	9.82623	9.72195	9.83541	9.6245
rna-XM_017312653.2	6.66838	7.32959	6.67929	4.07087	6.49341	8.00154	4.12704	7.0816	4.80388
rna-NM_011960.3	8.06451	7.59361	7.45844	7.57501	7.52924	8.11218	3.17337	3.17337	7.7341
rna-NM_001359854.1	9.82025	9.44445	9.43909	9.03964	9.71277	9.33467	9.70791	8.87567	10.272
gene-Gm4366	9.56345	9.41187	9.22872	9.6314	9.21002	9.0095	9.01289	9.1176	9.33854
rna-XM_011250977.4	3.17337	7.16001	8.06922	8.02348	7.65628	7.95662	8.15117	6.45479	3.17337
rna-XM_006503965.4	6.88513	7.32959	7.18732	6.59277	7.15154	5.95996	7.92692	7.3468	6.24125
rna-XM_006525658.3	8.54617	8.12898	8.33186	8.44175	4.14419	9.39309	4.55982	3.84936	4.86385
rna-XM_017320045.3	11.3248	11.8747	11.8866	3.17337	11.5894	3.17337	3.17337	11.3566	3.17337
rna-XM_006529405.3	8.32732	3.17337	8.21838	7.92512	8.69652	8.59485	8.9945	9.04506	9.10965
rna-XM_011241935.4	6.28912	6.51711	6.37182	6.29089	5.92644	6.48098	6.19662	6.40358	6.35993
rna-XM_036161736.1	6.30514	4.83395	8.45052	6.16782	8.2423	7.81276	6.38004	6.48793	5.75155
rna-NM_007481.3	11.0524	11.1639	11.0705	10.9021	10.7171	10.5875	10.7902	10.4889	10.4995
rna-NM_153064.5	9.91862	9.5992	9.93653	9.69241	9.72005	3.17337	9.71354	9.76356	9.28772
rna-NM_001362647.2	6.61821	8.04033	6.62051	5.8606	7.73896	8.23761	6.43622	7.97565	5.91745
rna-NM_001357519.1	5.5098	5.4197	5.45236	6.13057	6.1361	5.88358	5.8665	6.38608	3.17337
gene-Mrip-ps	7.41781	6.94161	8.38542	7.46864	8.37367	6.99165	8.79644	8.97447	7.48136
rna-XM_006501329.3	6.23992	5.25277	4.86001	5.99176	6.25477	6.10114	6.1125	6.04954	4.60262
rna-NM_001357972.1	6.18892	6.6357	6.90265	6.92997	6.58634	6.22932	6.50345	6.88527	5.69145
rna-XM_036158058.1	4.32259	4.89481	5.58519	5.7156	5.176	4.69402	5.66612	4.93092	5.30205
rna-NM_178764.4	8.36177	5.16047	8.36423	8.49682	4.04487	8.85666	4.36739	4.76279	8.92242
rna-NM_009295.2	3.17337	6.60282	6.37182	6.9929	6.74427	6.45513	6.09505	6.8976	3.17337
gene-Gm9416	7.23115	8.00953	7.49144	7.79042	7.28356	7.39422	7.53296	6.92194	7.51549
rna-NM_010387.3	9.53019	9.16336	8.50959	8.89412	7.88613	7.719	7.96049	7.64525	8.24149
rna-NM_029023.3	9.63714	10.4082	9.60471	9.75696	8.60828	8.74495	8.89887	8.35061	9.18036
rna-XM_006510435.5	5.18983	6.13361	5.81703	3.17337	5.62888	6.34675	5.6899	6.99256	5.94326
rna-NM_007414.3	10.0334	9.83685	9.81697	9.88627	9.70399	9.57333	9.59347	9.65222	9.61471
rna-XM_030250618.1	7.264	7.58527	7.5173	6.95126	6.40858	8.65228	6.16358	8.59612	8.44968
rna-NM_007907.2	12.3744	12.8704	12.6253	12.6157	12.2827	12.0809	12.3246	12.4602	12.1862
gene-Gm7049	5.15302	4.46888	4.49518	5.36847	4.14419	5.2428	4.6711	5.03124	5.07771
rna-NM_001081189.3	5.22561	3.17337	5.06483	5.36847	5.27997	5.47449	5.64192	4.87748	5.3819
rna-NM_010518.2	7.58944	8.21788	7.96044	7.56128	7.88613	8.21491	7.86746	8.35061	8.04548
rna-NM_001039185.1	8.21871	8.37108	8.38191	7.83103	8.03373	8.68567	8.37391	8.08163	8.83745
rna-NM_022415.3	7.09166	6.6357	6.64431	7.10154	6.25477	6.06716	6.72203	5.63485	5.83701
rna-NM_130449.2	4.15167	4.89481	4.86001	4.26422	5.06277	4.87771	5.07071	5.6648	4.92094
rna-XM_017321877.1	4.95077	5.79336	5.06483	3.17337	4.74919	3.17337	3.17337	3.17337	5.02764
rna-XM_006506829.5	5.53791	5.79336	3.17337	7.24614	5.24624	9.33116	5.10797	6.53623	6.85171
rna-NM_001372258.1	7.45382	7.46312	7.72016	7.6483	8.21783	7.57174	7.36378	7.16542	7.43752
rna-XR_004934902.1	3.17337	5.11168	5.58519	5.55325	6.31832	3.17337	8.1133	3.17337	3.17337
rna-NM_022653.4	6.09958	6.80409	5.99666	6.52313	6.33378	5.84374	6.26046	6.13631	5.596
rna-NR_153761.1	5.5098	5.79336	6.15565	5.40111	5.02264	5.67166	6.33638	5.85779	6.41572
rna-NM_001360912.1	6.90613	7.20432	5.87955	7.19361	3.9309	6.8006	4.21445	5.95699	4.02049
rna-XM_036162516.1	7.03563	10.5433	9.7748	11.4177	11.8615	3.17337	3.17337	10.5407	3.17337
rna-NM_026559.3	9.61034	9.35426	9.22089	9.07384	9.03671	9.07396	9.18086	8.3053	8.84081
rna-NM_001379128.1	9.58142	9.4329	9.58044	5.55325	8.75437	8.69664	8.72574	8.64785	8.48019
rna-NM_177214.5	9.04955	9.14649	8.94002	8.81545	8.85564	8.77629	9.06669	9.03121	8.97232
rna-NM_030093.3	7.38088	7.79503	7.40401	6.85286	6.77835	6.86065	7.2044	6.83486	7.24737
rna-XM_036156479.1	6.13601	5.49584	5.85902	5.5817	6.10025	7.04431	6.19662	6.07175	5.99347
rna-NM_026632.4	5.22561	3.17337	4.76718	4.68323	6.11829	6.60356	5.84563	6.25713	5.96859
rna-NM_017470.2	3.17337	7.6265	7.78543	7.57501	7.76738	8.19958	8.17179	8.08699	7.50704
rna-XR_003946383.2	5.67024	5.53233	6.12186	6.23946	6.00639	6.19836	6.44992	6.76924	6.15615
rna-NM_146159.1	5.9435	7.13732	6.20486	5.76566	6.54726	6.10114	5.90731	5.93285	6.696
rna-NM_175105.3	8.29202	8.54862	8.32457	7.86494	8.34758	8.38723	8.03892	7.9405	8.33033
gene-Gm12435	6.18892	7.65068	7.18732	6.25681	5.86329	5.52657	5.64192	5.21045	5.86435
gene-Gm12430	4.81112	4.76979	4.71783	5.22905	4.45775	5.03682	4.86539	5.47421	5.99347
gene-Gm46808	5.74385	6.26637	5.97782	6.2041	5.37621	5.62501	5.64192	5.40411	5.49325
rna-XR_003956158.2	6.74046	5.73266	6.15565	5.92774	6.87596	6.69452	4.36739	6.92194	4.44451
rna-XM_036152650.1	6.32099	3.17337	6.0336	5.79002	3.17337	3.17337	7.08736	6.96941	6.15615
rna-XM_011246232.3	7.84379	6.61935	4.66624	3.17337	5.81951	7.72972	7.52656	8.28209	5.75155
rna-NM_007764.5	5.42173	8.1404	5.68273	5.60957	7.60681	5.10927	5.24693	4.93092	5.30205
gene-Gm10288	9.36649	9.72765	9.43909	9.57965	8.9453	9.13968	9.03555	8.58858	8.84081
gene-Gm10282	8.17631	8.53138	8.32457	7.7056	7.9569	8.05366	7.91718	7.55508	7.81164
rna-XM_036159861.1	4.59426	6.46307	6.40016	6.7101	7.03452	6.78001	3.17337	7.14492	6.61916
gene-Gm13743	4.59426	5.4197	5.102	4.94095	4.38845	4.58973	4.72283	4.32421	5.12586
rna-XM_030245012.1	8.38057	3.17337	8.01586	8.22835	3.17337	3.17337	8.14701	8.558	8.32072
rna-NM_001356497.1	4.95077	5.66913	4.98697	4.49476	5.176	8.50417	5.5666	4.49144	4.14706
rna-NM_010729.3	4.65251	5.37992	4.55526	4.26422	3.17337	3.17337	4.6711	5.16797	3.17337
rna-NM_001284428.1	9.51667	9.34689	9.21499	9.29702	8.62388	8.15256	8.24366	8.34615	8.51007
rna-NM_145983.2	4.70787	5.06093	5.27308	5.81396	5.34491	5.88358	4.61687	5.5408	5.45716
rna-XM_017312570.3	9.44175	8.7778	9.12344	8.94252	9.10055	9.05705	9.14588	9.03399	9.7334
rna-NM_023595.6	6.74046	6.55202	7.27341	5.30063	4.45775	6.40198	3.91733	6.35043	6.68096
rna-XM_036164523.1	7.48199	6.55202	8.5192	5.88335	7.29923	8.96488	7.05208	6.83486	3.17337
rna-XM_006496322.2	6.8745	6.26637	6.65607	5.63686	5.60305	5.99662	7.07862	6.04954	6.15615
rna-NM_029868.3	4.05162	6.6357	6.67929	4.4237	4.84747	5.2428	5.21359	7.23495	7.0747
rna-NM_008792.4	8.41743	8.57409	8.87413	8.26689	8.6667	9.2102	8.49989	8.68015	8.9906
rna-XM_036159071.1	5.79079	5.56786	4.71783	5.97075	5.37621	3.17337	3.17337	3.17337	4.86385
rna-NM_030694.1	7.08247	10.0332	8.8816	7.25471	6.57343	8.6007	8.28209	6.45479	8.32553
rna-NM_027032.2	5.26042	6.20157	6.23673	5.55325	5.70353	3.17337	3.17337	5.60423	5.07771
rna-XM_036152312.1	8.74195	8.51394	10.1912	9.33377	9.31369	9.32411	8.8149	9.55497	9.76559
rna-XR_866224.3	7.28815	7.43553	7.68638	7.62208	7.10766	7.46017	7.25178	7.54731	7.02807
rna-XR_003948152.2	4.99395	5.56786	4.49518	6.55139	6.02568	6.1667	5.17935	9.20404	5.26022
rna-NM_029629.2	5.85833	5.66913	5.42413	5.60957	6.10025	3.17337	5.61728	5.7784	6.22045
rna-NR_102383.1	4.90601	3.17337	4.3634	4.26422	5.24624	5.03682	4.99267	5.75087	3.17337
rna-NM_178886.3	8.11926	6.17928	6.84233	7.79629	8.71994	8.80696	8.84857	8.29606	8.96618
rna-XM_006505617.5	6.49839	6.83268	6.46861	7.5334	7.93703	6.34675	7.83679	7.70935	6.57097
gene-LOC118567683	4.76065	3.17337	4.49518	4.79322	3.79422	3.17337	4.77232	4.12101	5.49325
rna-XM_030255550.2	7.34297	6.20157	6.28322	6.56532	6.69752	6.64977	6.3065	6.33226	6.66576
rna-NR_033619.1	6.71684	7.31956	7.13809	6.9192	6.69752	6.86065	6.90155	6.72836	6.50407
rna-NM_026403.3	7.44669	8.11747	7.86305	7.49055	7.70998	7.51083	7.10468	6.87283	7.24737
rna-NM_010352.2	4.95077	3.17337	5.06483	6.0923	5.13938	5.95996	5.75882	3.17337	5.91745
rna-NM_001357488.1	5.26042	5.79336	6.0517	5.15325	5.34491	3.17337	5.10797	5.98071	3.17337
rna-NM_172151.4	8.20612	7.55142	7.65761	8.02348	8.51428	8.53503	8.34516	8.61481	8.26171
rna-NM_010902.4	10.3808	8.3218	9.31033	10.3776	9.97238	9.87286	10.0154	9.74672	10.1634
rna-XM_006501049.5	8.19342	4.46888	4.61215	8.91043	8.69652	7.61868	4.36739	4.7009	7.992
rna-XM_036164785.1	9.08663	9.55514	9.66222	9.36369	9.28651	8.75022	9.44398	9.52762	8.87401
rna-NM_010434.2	9.50302	9.36402	9.29362	9.13758	9.72295	9.35556	9.69658	9.48764	9.20926
rna-XR_390323.5	6.8638	6.60282	7.84786	7.14831	7.43312	8.0957	6.99748	8.48673	8.4845
rna-NM_008609.4	6.38263	5.25277	5.27308	6.23946	7.57499	7.06144	7.32741	6.71447	6.95514
rna-NM_001122992.1	6.89567	7.18234	6.83202	7.07272	7.40443	7.40765	7.41319	7.48353	7.76987
rna-NM_001081227.2	7.14557	7.06703	7.81698	7.67404	3.17337	3.17337	7.52014	7.89837	7.44639
rna-NM_172843.4	3.17337	3.17337	6.93189	6.87532	3.17337	7.40765	5.92727	6.88527	7.24737
rna-XR_001785155.1	7.35063	7.81656	7.49144	7.39308	7.22729	7.20704	7.16369	7.24461	7.0747
rna-XR_376833.5	7.58296	8.01574	7.81177	7.84809	7.04387	6.88012	6.49025	7.10302	7.74852
rna-NM_009105.4	8.99696	8.42341	8.72151	8.73225	9.36843	9.05279	9.20505	9.08848	9.30242
rna-NM_025476.6	6.41248	3.17337	5.06483	5.40111	5.90571	6.40198	6.16358	6.15719	6.11157
rna-NM_001025431.1	7.23943	7.61015	7.03422	3.17337	7.72164	7.57174	6.00435	7.41679	7.54884
rna-NM_025923.3	6.39763	3.17337	6.70214	4.07087	4.14419	7.89127	7.74615	7.56282	4.44451
gene-Gm11847	9.96415	10.3144	10.2654	10.0632	9.65017	9.5311	9.67221	9.5799	9.69491
rna-NM_013822.5	7.189	3.17337	6.54659	7.28849	7.58141	7.48572	7.35658	7.45887	7.4196
rna-NM_053196.3	6.97732	5.96084	6.62051	6.89743	6.53399	6.69452	6.5423	7.12413	7.25751
rna-NM_146241.3	4.76065	3.17337	5.02651	5.30063	5.49446	5.47449	5.5666	5.88327	5.30205
rna-XR_001780742.1	5.88012	3.17337	5.81703	5.52418	5.84157	6.62685	6.35108	6.2952	5.17224
rna-NM_177473.3	8.14587	8.23927	8.27245	8.13419	8.05692	8.19958	8.23976	8.86634	8.0513
rna-XR_004941292.1	8.81835	7.83073	7.68067	8.65366	8.99413	9.28107	9.25803	8.84117	9.39451
rna-NM_025543.2	5.67024	5.11168	5.75153	5.55325	5.65422	5.47449	5.51393	5.75087	5.26022
rna-NM_013697.5	10.4366	11.6408	11.0274	12.0289	10.9558	10.6051	11.7772	11.6265	10.508
rna-NR_029447.1	4.65251	5.06093	5.102	4.07087	5.60305	4.78948	4.77232	4.49144	4.25711
rna-XR_871078.4	5.83618	5.87964	5.55966	4.89371	5.92644	4.78948	5.4591	5.12402	3.17337
rna-NM_053141.3	5.5098	4.76979	4.76718	4.5613	5.43665	4.78948	5.5666	5.03124	5.80911
rna-XM_011248073.3	6.96736	9.2528	7.62231	3.17337	9.28061	6.62685	8.65724	7.65975	7.03987
rna-NM_008711.2	5.03566	4.83395	5.17321	4.84453	5.40678	5.95996	5.54052	5.12402	5.02764
rna-NM_001293672.1	7.02608	5.37992	5.65899	6.90836	6.57343	6.89932	6.67628	6.13631	6.92998
rna-NM_029891.3	6.79785	6.34838	6.83202	6.73491	7.1857	6.53129	6.92126	7.16542	6.68096
rna-NM_008869.4	7.38834	5.63621	6.23673	6.94065	7.80624	6.89932	7.39222	7.43377	7.58142
rna-NR_160895.1	3.17337	3.17337	4.90383	5.26533	4.74919	3.17337	5.4591	5.63485	4.80388
rna-NM_008608.4	9.37213	9.34689	8.92322	8.15261	7.8913	8.18407	7.87251	7.53949	8.85419
rna-NR_155761.1	10.0239	3.67708	8.75715	9.66703	3.61406	8.01036	8.12603	7.98718	8.82392
rna-NM_011358.2	9.52176	10.0828	8.72429	5.49447	7.03452	8.93742	8.78579	7.50778	7.36446
rna-XM_036152559.1	7.05455	5.16047	6.31338	7.21134	6.34906	6.73791	7.14708	6.52031	4.60262
rna-NM_001170966.1	6.98721	3.17337	6.40016	6.77133	6.8334	6.99165	3.17337	7.19563	7.09746
rna-NM_001033439.3	6.94725	3.17337	3.17337	7.04331	7.54246	7.63018	7.79484	7.41679	7.50704
rna-NM_001356481.1	8.73028	7.29928	8.14986	8.40383	9.14014	9.59399	9.12912	8.7696	9.03237
rna-NM_001371035.1	7.22282	8.57409	8.42005	7.57501	8.28613	7.51083	4.95171	7.16542	7.26756
rna-XM_036159554.1	9.58951	10.2658	10.4118	10.8267	9.27864	9.05705	9.25224	9.6791	8.88708
rna-NM_009797.3	8.36932	8.41404	8.16628	4.49476	8.38103	8.52891	8.33788	8.1396	7.97984
rna-XM_006520168.5	3.17337	3.17337	5.61024	3.17337	5.52244	5.03682	5.66612	5.29141	5.72183
rna-XR_004939231.1	5.964	5.4197	5.53363	3.17337	5.84157	6.06716	6.12973	6.43793	6.45173
rna-NM_145371.4	3.17337	7.36903	6.90265	6.13057	3.17337	3.17337	6.68786	6.42085	6.68096
rna-NM_053214.2	7.98319	5.90724	6.2524	7.1666	8.61454	8.82705	8.90873	8.38587	8.62376
rna-NM_033568.3	8.02681	8.04642	8.27624	8.40383	8.52097	8.92815	8.31211	8.29606	8.69609
rna-NM_001005859.3	8.50567	8.70281	7.57385	3.17337	8.14179	3.17337	6.95988	3.17337	3.86828
rna-NM_007798.3	10.064	11.0415	13.4394	10.1539	12.3089	12.3771	10.1028	9.31788	12.1997
rna-NM_175606.3	6.48443	8.10587	3.17337	6.22189	3.17337	3.17337	7.08736	3.17337	6.22045
rna-NR_151627.1	4.32259	6.58608	3.17337	4.73954	4.52266	4.78948	4.6711	8.11354	5.66038
rna-NM_010495.3	10.8764	12.1649	10.4058	3.17337	9.14014	10.5578	10.4709	3.17337	9.11244
rna-XR_001785590.2	6.49839	6.2451	6.37182	6.14932	6.66142	6.1667	6.32152	6.92194	5.78063
rna-NM_001362459.1	7.82744	8.83158	8.46053	7.66123	5.176	4.87771	5.17935	5.6648	5.34258
rna-XR_379295.5	3.17337	4.76979	4.81451	4.68323	3.9309	3.17337	5.10797	4.82154	4.80388
rna-NM_178736.5	6.38263	5.98687	6.17225	6.05295	6.58634	6.75911	3.60605	3.84936	4.52652
rna-XM_006530292.5	7.17179	5.53233	5.63484	6.37262	6.31832	5.76041	6.00435	6.40358	6.43384
rna-XM_006534876.4	6.656	6.49932	4.94611	7.30508	7.16873	7.04431	5.66612	5.5408	7.59744
rna-NM_025292.7	7.85997	6.2235	6.38606	7.6483	8.18453	7.68633	8.0744	7.83596	7.992
rna-NM_013686.4	9.38893	9.75573	9.63449	9.35776	9.13362	8.89047	8.99681	9.06964	8.90967
rna-NM_172741.3	9.8475	5.66913	7.47833	9.65256	9.83574	9.79599	6.88157	8.95407	9.24268
rna-NM_001033306.1	7.72518	7.84476	7.36891	6.81849	7.19412	6.93697	7.06983	6.23771	6.71088
rna-XM_006512127.5	6.11791	7.11427	3.17337	6.9826	3.17337	3.17337	5.3421	5.03124	3.17337
rna-NM_001310598.1	8.14147	7.96526	8.43705	8.13419	8.84236	8.6181	9.0333	8.89108	8.65466
rna-XM_006521430.4	8.30781	8.23927	4.81451	6.9826	9.11828	8.95578	5.07071	9.01161	6.66576
rna-XM_036156767.1	6.656	7.61835	7.21132	6.43476	5.40678	6.1343	5.84563	5.75087	6.17791
rna-XM_036164021.1	8.6176	5.9343	7.71458	7.95691	7.77299	8.41405	8.08314	7.85496	8.75074
rna-NM_009214.4	6.78656	6.80409	7.54899	7.95691	7.03452	7.58362	6.9407	7.49166	7.50704
rna-NR_151681.1	5.964	7.18234	6.49508	6.23946	5.90571	6.64977	5.66612	6.67197	6.01791
rna-NM_009622.2	10.0558	10.6288	11.6318	11.0796	11.3725	10.447	11.7569	11.9813	9.49821
rna-XM_006497160.5	6.38263	7.29928	6.50814	7.71182	6.40858	7.86233	5.64192	6.62815	6.63486
rna-NM_025901.3	8.14587	7.75843	7.74772	7.59537	8.3847	8.0365	7.90244	7.7163	7.65979
rna-XM_006517074.5	9.97778	6.36816	6.22089	9.9455	9.88964	9.97764	4.81978	9.93242	10.995
rna-NM_020579.2	7.82744	7.11427	7.3109	8.29202	7.54903	7.91964	7.26722	8.02123	7.79091
rna-XM_017313344.3	6.48443	6.2235	5.55966	5.74086	5.54985	3.17337	5.4019	5.6648	6.83824
rna-NM_172414.4	5.26042	4.95273	5.17321	4.49476	5.06277	5.2428	4.77232	4.49144	4.74066
rna-XM_006501470.4	5.61886	5.98687	9.24039	5.22905	9.25078	5.67166	5.66612	6.07175	9.75137
rna-NM_010169.4	7.14557	3.17337	7.0871	3.17337	6.67356	3.17337	5.75882	6.33226	3.17337
rna-XM_006515273.3	7.35063	6.01243	6.98861	6.89743	6.94751	7.26728	7.05208	3.17337	3.17337
rna-XM_030243074.2	6.28912	5.90724	5.68273	6.89743	6.25477	6.93697	7.01591	7.83596	6.35993
rna-XM_006508915.3	7.58296	6.91515	10.5727	8.27111	7.41165	7.25245	8.04788	3.99763	3.66709
rna-NM_173037.1	5.56544	3.17337	5.68273	5.26533	5.57671	5.71676	5.59218	6.07175	5.89116
rna-NM_001290988.1	7.05455	7.35927	7.95573	7.15749	5.06277	7.57174	5.21359	5.33006	7.5239
rna-NM_001042438.2	8.159	6.03753	6.20486	8.00332	6.91728	7.79245	7.15541	8.3236	8.30132
rna-XM_006515443.5	8.04578	8.10003	9.44751	8.15718	9.36472	9.0613	8.60061	8.67304	7.69743
rna-NM_008059.3	3.17337	3.17337	5.17321	5.07262	5.57671	6.03234	5.37234	5.75087	4.60262
rna-XM_006505401.4	7.49587	8.23395	7.91743	7.13908	7.14287	6.89932	6.84074	3.17337	7.18504
gene-Gm6975	6.02373	6.13361	5.93935	6.01246	5.54985	5.47449	5.64192	5.16797	5.75155
rna-NM_009139.3	8.33119	7.85866	7.86305	9.62812	9.22646	9.26276	9.41143	9.20157	9.15627
rna-NR_164193.1	10.0744	10.5162	10.2317	10.3599	9.62713	9.65424	9.75918	9.1991	9.86798
rna-NM_153781.1	7.87596	8.19616	7.91257	8.18428	8.39929	8.40071	8.72852	8.82842	8.71454
rna-NM_009067.5	10.0251	8.63586	9.4542	8.96352	10.2914	9.9866	10.313	10.0876	9.74959
rna-XM_036154878.1	5.88012	6.2451	6.08722	5.8606	5.57671	5.30469	5.88706	5.43962	6.50407
rna-XM_017321382.3	6.20613	6.49932	7.27341	6.38842	6.54726	7.06144	6.16358	7.14492	7.36446
rna-NM_001083331.2	6.8745	8.56987	8.39589	8.2456	8.37735	5.30469	8.70327	8.74606	8.38664
rna-NM_010572.2	3.17337	5.16047	4.49518	5.5817	5.34491	4.95986	5.54052	5.07849	4.74066
rna-NM_009912.4	5.07601	3.17337	5.02651	4.98643	5.60305	5.30469	5.14416	5.25156	5.42006
rna-NM_207176.3	8.74485	8.61556	8.73532	8.84121	7.68039	7.55977	7.86239	7.76402	7.59744
rna-NM_001205181.1	5.22561	4.76979	4.49518	4.49476	4.79936	4.34441	5.4868	4.49144	4.67376
rna-XR_386023.4	7.64653	3.17337	7.35463	7.34575	8.03839	7.55977	7.44748	8.39021	7.21655
rna-NM_001256521.1	8.28405	3.17337	8.48036	8.71067	3.17337	9.20637	3.17337	3.17337	8.9382
rna-XM_006509227.4	7.12783	7.34944	6.44162	7.30508	6.90706	7.48572	7.1387	7.65252	8.13041
rna-NM_010690.1	7.35063	8.20162	7.58612	7.1666	7.36028	6.8209	7.33476	7.66694	7.03987
gene-Gm8974	4.90601	5.49584	4.86001	4.94095	4.84747	5.10927	4.81978	4.49144	5.02764
rna-NR_130971.1	4.46738	4.62958	4.43143	4.62395	4.93822	4.58973	5.31115	5.40411	4.86385
rna-NM_138602.4	7.77722	7.04281	7.14641	7.08239	7.41165	7.473	7.43386	7.31047	7.58945
rna-XM_036158029.1	8.37308	7.35927	8.12488	8.58078	8.86879	8.87608	8.85623	8.89414	8.56397
gene-Gm6563	8.87243	8.54002	8.31356	9.0495	8.76285	8.76071	8.54482	8.6623	9.26537
rna-NM_007492.4	4.70787	3.17337	5.06483	5.60957	5.43665	5.03682	5.4868	5.36761	6.08874
rna-XM_006541197.2	4.99395	5.70126	3.17337	3.17337	6.28691	3.17337	6.61695	6.47146	3.17337
rna-NM_027875.1	3.17337	3.17337	3.17337	6.94065	3.17337	6.34675	6.58011	6.15719	6.06553
rna-NM_001372372.1	3.17337	5.16047	5.95872	5.76566	6.0447	5.99662	5.6899	5.93285	5.34258
rna-NM_026455.5	9.75985	9.77049	9.96611	9.59487	9.56061	9.59105	9.99592	9.8947	10.2354
rna-XM_011243406.3	3.17337	3.17337	5.27308	6.05295	7.38986	6.19836	3.17337	6.45479	5.26022
rna-XM_011247444.4	6.25651	6.06218	7.38305	5.83748	6.27093	7.97476	6.35108	6.45479	6.57097
rna-XR_004940656.1	6.59245	3.17337	6.71343	7.14831	7.39716	6.8209	6.8613	7.58577	7.16364
rna-XM_030251199.1	3.17337	5.06093	4.66624	5.5817	4.69672	3.17337	3.17337	4.63543	4.44451
rna-NR_040292.1	3.17337	3.17337	3.17337	5.33499	5.7743	3.17337	5.8665	5.25156	6.01791
rna-XM_011245879.4	7.78853	7.87243	8.46717	8.28786	8.12433	8.49792	8.59451	8.30989	7.97372
rna-NM_027712.3	5.9842	6.46307	3.17337	3.17337	4.45775	5.84374	5.07071	5.25156	5.80911
rna-NM_001289601.1	6.80906	5.87964	5.81703	6.46484	6.61181	6.71638	6.65285	6.47146	5.21698
rna-XM_006505495.5	5.56544	9.02249	5.97782	6.92997	7.14287	6.84091	7.22037	6.98103	9.43288
rna-XR_004938619.1	3.79911	4.76979	4.12379	5.76566	5.7743	5.80271	4.77232	8.10298	4.60262
rna-XR_004935826.1	5.6448	5.56786	5.42413	7.90353	7.31474	7.26728	6.02297	10.0728	4.25711
rna-NM_001355615.1	6.78656	4.89481	4.55526	4.26422	6.36418	6.28926	4.81978	4.41131	6.45173
rna-XM_017313838.3	7.53672	7.25785	8.12488	7.52635	7.91689	3.17337	8.34152	3.17337	3.17337
rna-NM_001309808.1	5.79079	6.66784	5.45236	3.17337	5.13938	5.30469	3.17337	6.55197	5.89116
rna-NM_030198.3	5.53791	3.17337	4.76718	5.22905	5.62888	6.03234	5.92727	5.47421	5.72183
rna-NM_133224.2	7.97826	7.67446	6.45518	7.2025	6.52059	6.19836	3.17337	7.45887	7.71221
rna-XM_006513314.5	8.95246	6.15663	3.17337	8.41912	6.76708	3.17337	3.17337	9.3934	8.0914
rna-NM_028040.2	6.64352	5.06093	6.12186	6.43476	6.36418	6.60356	6.29132	6.15719	6.19934
rna-NM_031256.3	7.93821	6.90173	7.99303	8.21088	7.76738	6.10114	3.78302	6.15719	8.1684
rna-XR_004934067.1	5.71975	5.4197	5.89977	5.68986	5.86329	5.52657	5.07071	5.43962	5.42006
rna-XM_030243302.2	5.90157	6.68364	7.0609	6.92997	6.49341	7.17594	6.77722	6.72836	6.68096
rna-XM_011247881.4	8.22704	8.9236	8.31724	9.10488	8.71412	8.59485	8.60061	8.69076	9.42619
rna-XM_006499907.5	8.68867	9.47406	9.36819	8.62099	7.94202	8.08739	8.27829	8.10298	7.95521
rna-NM_007646.5	7.44669	6.38766	6.37182	7.10154	7.43312	7.54769	7.18012	6.61324	6.87828
rna-NM_001042407.1	6.17151	5.87964	5.58519	5.92774	6.39393	6.22932	5.96635	5.80537	6.39737
rna-XR_004938039.1	5.69522	5.73266	6.0517	6.16782	6.31832	6.06716	6.73324	6.72836	6.11157
rna-NM_021459.4	3.17337	4.95273	4.71783	5.07262	4.84747	4.47435	5.24693	4.87748	5.02764
rna-XM_006496041.3	9.06821	9.17172	9.10866	8.65366	8.46661	8.04511	8.41252	8.48267	9.15627
rna-NM_021028.3	3.17337	7.76582	3.17337	7.28012	7.8705	8.01913	3.17337	7.92858	8.01005
rna-XM_017312341.3	8.10576	8.05247	8.17847	8.0823	7.50243	7.35314	7.8212	8.09234	7.58945
rna-XM_006523515.5	3.17337	3.17337	7.94148	4.34724	4.31393	5.36376	7.66696	4.87748	7.62114
rna-XM_036157992.1	7.44669	3.17337	5.85902	8.03841	6.9375	6.40198	7.53933	7.29196	8.03376
rna-XR_004933732.1	5.83618	6.95466	6.41412	7.2025	6.92743	6.97366	6.96937	8.52281	7.30711
rna-XM_006540909.1	7.12783	7.27872	7.19537	7.22884	7.48883	7.29647	6.99748	8.08699	7.15282
rna-XM_036160779.1	5.26042	4.95273	5.50709	5.22905	5.90571	5.47449	5.17935	5.6648	5.02764
rna-NM_008747.2	8.08299	3.17337	8.19457	3.17337	7.426	3.17337	3.17337	9.08848	7.31683
rna-NM_010028.3	11.9082	12.9438	12.6194	12.0088	11.8201	11.6456	11.3186	11.6155	11.9311
rna-NM_178598.2	13.4627	12.65	12.482	12.9727	11.2202	11.2005	10.9703	10.6891	11.1248
rna-NM_010094.4	5.61886	6.0864	6.23673	6.0923	6.10025	6.28926	6.55502	6.15719	5.94326
rna-NM_146047.2	9.45775	9.2236	9.46584	9.44245	9.48063	9.71478	9.3603	9.36057	9.10127
rna-NR_033553.1	5.18983	4.76979	5.55966	5.55325	5.34491	3.17337	4.99267	6.0936	4.97545
rna-XM_030245001.1	5.22561	4.27823	4.49518	5.19171	6.0447	5.9223	5.4019	5.75087	6.46939
rna-XM_036165143.1	7.5959	6.84676	6.84233	7.03337	7.25168	7.11164	7.48757	7.38222	7.2269
rna-XR_001778822.3	8.98719	8.63586	8.59389	8.86652	8.76285	8.38045	6.8916	8.34166	4.67376
rna-XR_387197.5	6.60539	7.65865	7.2427	5.94941	7.25971	7.31085	6.49025	7.2542	7.23717
rna-NM_178791.5	5.03566	4.27823	4.71783	4.68323	5.2116	5.62501	4.99267	5.33006	5.596
rna-NR_168088.1	5.45174	5.90724	5.93935	6.16782	6.22187	4.01246	4.72283	8.79604	4.35533
rna-NM_001190414.2	6.00411	7.04281	6.93189	6.41948	6.66142	6.91827	6.91144	7.05986	6.08874
rna-XM_006516938.3	9.98024	5.90724	5.93935	5.55325	5.81951	5.95996	9.73169	9.30643	6.30184
gene-Gm12834	5.74385	5.79336	5.33561	6.14932	5.60305	5.99662	6.05948	5.33006	6.41572
rna-NM_025352.3	11.1404	11.8951	11.856	11.4403	10.833	10.7396	10.729	10.6168	10.6783
rna-NM_138741.1	9.90441	8.37108	8.72705	9.28873	10.2894	10.1529	9.94417	9.79666	11.1351
rna-NM_001272033.1	5.35957	5.4197	5.13811	5.26533	4.6417	5.36376	4.90933	4.63543	5.596
rna-NM_133800.3	6.15387	3.17337	6.57166	3.17337	5.54985	6.75911	4.02936	6.94587	5.3819
rna-XM_030248690.1	10.1142	10.8209	4.98697	10.1355	9.63023	9.91804	9.87802	9.96482	9.84138
rna-NM_001364771.2	4.59426	4.37817	5.55966	3.17337	4.69672	5.62501	4.36739	4.63543	4.97545
rna-NM_009516.3	6.17151	7.85173	4.02642	6.0923	6.78953	6.67232	6.8916	7.0816	6.37878
rna-XM_030244475.2	8.75353	9.39054	9.3823	9.18974	9.81143	9.86803	9.81	10.0822	9.48752
rna-XM_006527313.3	8.63022	8.94002	8.90867	9.16049	8.30948	9.20253	8.60364	8.58479	9.0499
gene-Gm4824	8.67352	8.95302	8.74901	8.56024	8.14612	8.23009	8.13025	7.8037	7.93645
rna-XM_030253081.2	3.17337	5.29655	7.50443	7.84242	3.17337	7.44722	7.78416	7.47536	8.48879
rna-XM_036162636.1	6.06217	3.17337	5.17321	5.83748	5.79709	5.57669	5.88706	6.2952	4.25711
rna-XM_036158835.1	7.05455	7.24731	9.57584	7.78453	9.79223	7.16013	10.0844	6.74212	7.89172
gene-Rpl21-ps15	4.65251	4.76979	4.81451	4.98643	4.74919	4.95986	4.77232	4.82154	4.74066
gene-Rpl21-ps11	6.92684	7.11427	7.04317	7.58862	7.29142	6.95543	7.02504	6.72836	6.60328
rna-NM_177261.4	7.12783	7.80224	8.28378	8.1932	8.07066	7.57174	7.87754	8.82842	6.55454
rna-NM_011401.4	7.98319	8.33179	3.17337	8.45664	8.03839	3.17337	8.15117	8.00431	3.17337
rna-NM_177152.5	5.39102	5.45832	5.72898	5.43297	6.18819	6.42881	6.24477	6.23771	7.10871
rna-NM_025602.3	8.64272	8.30668	8.58171	8.26689	8.35882	8.17626	8.3524	8.03795	8.81027
rna-XM_006526460.5	7.33526	6.80409	7.3109	5.43297	8.18873	7.84271	5.03231	7.16542	6.28193
rna-NR_015464.1	3.17337	3.17337	5.33561	5.19171	3.17337	5.03682	4.61687	3.17337	4.74066
rna-NM_011266.2	6.04309	6.2451	5.83819	6.01246	5.60305	5.57669	6.00435	6.42085	5.99347
rna-XM_006506311.5	7.89178	7.6346	7.53006	7.60879	7.78971	7.81276	7.96523	7.69535	7.97372
rna-NM_013765.2	10.9939	11.4152	10.9425	11.1523	10.5807	10.5963	10.7829	10.2386	10.3601
rna-NM_019482.2	5.88012	5.87964	6.32822	6.13057	5.34491	5.99662	5.80291	5.21045	5.56261
rna-NM_001374654.1	8.68867	3.17337	8.37839	5.92774	7.97649	8.29646	7.98401	8.02682	7.71221
rna-XM_006497786.5	3.17337	10.4235	10.0711	9.76296	3.17337	9.98883	3.17337	10.7161	3.17337
rna-XR_003950455.1	9.61193	8.86291	9.47904	9.26567	9.16381	9.12758	8.66889	9.18166	9.047
rna-NM_027485.4	6.71684	7.09085	6.97931	6.63297	6.92743	6.48098	6.92126	6.02697	6.45173
rna-XM_006524675.5	6.49839	7.81656	6.76856	3.17337	8.66368	6.88012	7.14708	7.2542	7.24737
rna-NM_201227.3	6.15387	5.11168	4.98697	5.22905	6.28691	6.03234	5.94695	5.93285	6.30184
rna-XR_004941600.1	5.6448	5.56786	5.33561	7.36961	7.08067	6.97366	6.1125	9.76858	4.35533
rna-XM_030249246.1	7.60233	4.37817	7.69207	3.17337	7.99102	5.30469	8.03892	3.17337	7.54884
rna-XR_004937203.1	5.32735	5.87964	5.89977	5.63686	5.81951	5.30469	5.66612	5.98071	5.02764
rna-XM_011239857.4	8.11926	6.81846	6.76856	8.41149	8.23825	8.18407	8.27449	8.31448	3.17337
rna-NM_001379438.1	6.06217	6.1102	6.29838	5.81396	5.94687	5.71676	5.71326	6.21801	5.94326
rna-NR_152614.1	4.85951	5.90724	7.89297	7.29681	5.24624	7.74037	4.90933	7.44219	6.53791
rna-NM_001379392.1	5.26042	5.00801	5.65899	5.03027	4.98115	3.17337	4.72283	5.36761	4.86385
rna-NM_001166370.1	5.9435	5.29655	5.45236	5.49447	5.49446	5.95996	5.90731	4.82154	5.52838
rna-NM_153570.2	7.76582	7.12585	7.41093	7.77266	6.72109	6.69452	6.67628	6.70044	6.26174
rna-XM_011250093.4	3.17337	3.17337	5.102	5.46408	3.17337	4.01246	5.14416	5.90828	5.91745
rna-NM_010591.2	10.4249	11.9816	11.3427	11.2269	9.73449	9.55538	9.67221	9.75685	10.2905
rna-NR_028376.1	5.5098	5.16047	5.72898	5.66362	5.75111	5.47449	5.4591	5.33006	5.78063
rna-XR_004939287.1	5.9435	6.15663	5.77372	5.76566	5.60305	6.37464	5.51393	5.80537	5.45716
rna-NR_167679.1	3.17337	4.16621	5.63484	4.98643	5.60305	5.52657	5.21359	5.5408	4.52652
rna-XM_011244066.4	6.27291	6.28733	9.99049	9.17181	9.82093	8.9694	10.2659	10.3068	5.89116
rna-NM_026272.3	6.27291	6.1102	6.15565	6.7101	6.40858	6.42881	7.08736	7.13456	7.60538
rna-XM_017317870.3	5.85833	6.01243	5.79555	6.25681	6.91728	6.3183	3.17337	6.80898	3.17337
rna-XR_004937472.1	3.17337	3.17337	4.90383	4.98643	4.23305	3.17337	4.81978	6.0936	5.02764
rna-NM_009780.2	9.33602	9.14649	9.03464	8.50759	6.43743	6.50636	6.27597	7.53163	5.83701
rna-NM_001290820.1	3.17337	3.17337	5.02651	5.46408	5.34491	3.17337	5.4868	4.7009	5.62857
rna-NM_001081420.1	6.47033	5.4197	5.50709	6.79511	6.86544	6.22932	6.91144	6.56754	6.65039
gene-Gm8779	6.33665	6.77492	6.0336	6.18607	5.43665	5.57669	5.64192	5.5408	5.596
rna-NM_007754.2	9.55189	9.26848	9.15049	9.15594	9.329	9.39646	9.18289	9.15126	9.90859
rna-XM_006538236.5	5.03566	5.20745	4.76718	4.73954	3.17337	3.17337	9.06669	3.17337	3.17337
rna-XM_036163205.1	6.70488	6.58608	3.17337	7.1666	5.96699	6.25961	5.78105	6.95768	7.33607
rna-NM_026038.2	4.05162	4.62958	4.12379	5.11358	4.84747	5.10927	5.10797	5.16797	4.74066
rna-NM_015827.2	9.33024	9.09171	9.65643	8.92389	9.29822	8.78658	8.97118	9.23818	9.23759
rna-XM_030252016.2	7.43232	7.34944	7.5237	3.17337	7.69822	3.17337	7.84709	7.47536	7.80477
rna-NM_016739.3	6.53947	6.46307	6.06957	6.56532	7.17724	7.11164	7.29763	8.71521	7.91106
rna-NM_146130.3	4.53271	4.55224	8.12068	4.73954	4.38845	7.44722	7.30513	8.30069	4.14706
rna-XM_036165007.1	6.23992	6.65186	6.32822	6.0923	6.10025	5.52657	6.27597	5.93285	5.86435
rna-NM_019487.3	4.59426	5.06093	4.71783	4.94095	5.176	3.17337	3.17337	5.07849	4.67376
rna-NM_001290745.1	9.98147	9.36402	9.76541	10.3218	10.1744	9.88249	9.78481	10.1062	9.48107
rna-XM_017312865.3	6.69281	7.28904	7.16292	7.04331	6.17104	7.11164	7.02504	6.96941	7.35506
rna-NR_027943.1	6.64352	7.77318	6.9415	6.7593	6.3027	6.34675	6.24477	6.67197	5.94326
rna-NM_001122759.2	6.75212	6.74514	5.27308	6.07277	5.98683	7.20704	7.04312	6.11512	6.87828
rna-XM_036154270.1	4.90601	4.55224	4.3634	4.49476	5.10166	4.69402	5.31115	5.03124	4.80388
rna-XR_003951189.1	6.23992	5.66913	6.70214	6.35665	7.05316	6.57988	6.51652	7.77071	5.21698
rna-XM_006523204.2	6.30514	3.17337	3.17337	6.52313	3.17337	6.91827	3.17337	7.29196	6.34083
rna-XM_006521385.5	6.04309	7.09085	7.1043	6.92997	6.4657	6.64977	6.8613	6.11512	3.17337
rna-NM_010879.3	4.15167	6.44459	3.7809	7.092	3.9309	6.64977	3.78302	4.76279	4.67376
rna-NM_026465.3	7.52323	7.35927	7.20337	5.74086	7.57499	6.88012	7.52656	7.15521	7.43752
rna-XM_006496555.5	6.63092	6.06218	6.10465	6.61969	4.74919	5.57669	5.80291	7.22522	6.22045
gene-Gm4986	5.53791	5.96084	5.45236	5.68986	5.40678	5.36376	5.4868	4.93092	5.62857
rna-XM_036161107.1	5.32735	3.17337	5.89977	6.88642	6.98684	5.76041	7.13027	6.95768	6.97987
rna-NM_007891.5	6.45609	5.96084	4.3634	5.36847	5.86329	5.47449	5.17935	5.88327	5.56261
rna-NM_010560.3	8.8045	3.17337	8.62687	3.17337	8.97236	9.14369	8.67756	8.64785	5.99347
rna-NM_019708.4	3.17337	10.0514	10.1464	10.1641	10.7762	3.17337	10.8329	4.22835	3.17337
rna-XM_030254386.1	7.67729	6.51711	6.98861	4.26422	6.31832	7.88169	5.27944	7.49166	5.56261
rna-NM_013742.5	5.74385	6.48132	5.9197	6.81849	7.17724	6.88012	6.04135	6.04954	7.15282
rna-XR_382235.4	5.81368	6.36816	3.17337	6.13057	4.93822	6.19836	5.27944	5.88327	5.91745
rna-NM_010877.5	7.73106	7.75099	7.89297	8.41912	7.74469	7.95662	7.87251	7.68122	8.03376
rna-NM_023209.2	4.32259	3.17337	4.86001	4.98643	4.84747	5.57669	3.17337	5.25156	3.17337
rna-XM_036159201.1	7.13673	8.89358	9.22285	7.05318	5.86329	6.1343	3.17337	6.72836	5.07771
rna-XM_036165882.1	3.17337	6.15663	3.17337	5.60957	6.53399	6.3183	7.04312	5.83183	5.99347
rna-NM_025745.3	7.04512	6.2235	6.93189	6.81849	7.19412	7.44722	6.42238	7.8861	7.38307
rna-NR_155747.1	8.37683	4.76979	3.17337	7.89808	7.93703	7.80264	7.57697	7.43377	7.58142
rna-XM_036155023.1	6.78656	6.73001	6.46861	6.07277	6.49341	6.37464	6.14676	5.93285	6.46939
rna-XR_386008.4	5.9227	6.17928	6.55918	6.44988	6.4657	6.55579	6.76635	6.2952	6.30184
rna-XM_006495532.5	5.76752	5.82273	6.0336	6.59277	5.65422	6.37464	6.29132	6.00403	6.34083
rna-NM_011755.2	5.79079	6.84676	6.49508	6.59277	5.81951	6.71638	5.64192	5.40411	6.94261
rna-XM_036155118.1	5.964	4.83395	4.55526	5.26533	5.88466	5.57669	6.1802	6.02697	5.596
rna-XM_006520052.4	6.56621	6.81846	3.17337	7.57501	3.9309	7.00942	8.49662	5.40411	6.30184
rna-XM_036157281.1	9.20306	4.95273	8.79457	5.36847	7.16873	7.61868	7.53296	6.52031	4.74066
rna-NM_001134692.2	7.5699	7.30946	6.29838	7.26323	7.72744	5.03682	8.02539	6.13631	7.71955
gene-Gm3436	6.27291	6.20157	6.10465	5.99176	5.6791	5.71676	5.84563	5.12402	6.24125
rna-XM_036153703.1	8.53615	7.89957	8.29875	8.0871	8.57334	8.44689	8.6097	8.24417	8.68116
rna-NM_008719.2	5.90157	6.55202	6.23673	3.17337	6.57343	6.37464	6.32152	3.84936	3.17337
rna-XR_004934226.1	3.17337	5.49584	5.33561	4.26422	4.6417	7.36696	6.99748	6.8976	6.8109
rna-XM_030246242.2	7.24767	6.53467	8.52239	7.54741	5.65422	7.84271	5.3421	5.57289	7.62895
rna-NM_001301652.1	7.09166	7.42622	7.16292	6.72256	6.78953	6.89932	6.60477	7.10302	7.13093
rna-XR_865942.3	4.99395	3.17337	4.71783	6.53733	6.33378	5.67166	5.37234	8.85696	3.17337
rna-XM_030249041.2	10.548	9.96747	10.4872	9.21623	10.0001	9.83618	10.0154	9.46517	9.63034
rna-NM_001162977.1	3.17337	3.17337	3.91476	4.4237	5.06277	5.80271	5.51393	5.25156	5.12586
rna-XM_006520564.2	5.1151	5.16047	6.76856	8.51472	3.17337	5.30469	7.34207	7.14492	3.17337
gene-Ppp1r2-ps1	6.84216	7.17121	7.04317	6.74716	6.00639	6.1343	6.09505	5.80537	5.96859
gene-Gm10243	9.16673	9.85946	9.54167	9.62318	9.1829	9.21402	9.28665	8.82521	9.15627
rna-XM_006528557.5	3.17337	5.06093	3.17337	5.49447	5.7743	3.17337	5.37234	4.76279	6.19934
gene-Cox5b-ps	9.45952	9.81031	9.67946	9.35577	9.06899	9.09067	8.92823	8.77957	8.94759
rna-NM_027570.4	5.56544	4.89481	4.3634	4.79322	4.23305	3.17337	3.91733	4.63543	4.80388
rna-NM_016750.3	6.52591	6.71472	6.06957	6.18607	3.17337	6.28926	5.6899	6.21801	6.06553
rna-NM_146178.2	4.70787	5.66913	4.12379	6.23946	6.63683	6.1667	6.69934	4.63543	4.52652
rna-NM_026075.3	8.44626	5.98687	6.89278	7.61545	7.94202	7.39422	8.07878	8.00431	8.24657
rna-XM_006513899.2	9.13389	7.42622	8.31356	8.39613	8.56043	8.62958	8.03892	7.96985	8.33987
rna-NM_001355206.1	5.83618	5.82273	6.23673	7.05318	6.54726	6.64977	6.29132	6.21801	6.86506
rna-NM_028900.4	7.43952	7.35927	7.57385	6.86413	7.34526	7.02697	7.29009	6.98103	7.74852
gene-Gm11263	9.47708	9.97545	9.6433	9.78524	9.00847	9.09896	9.17883	8.64785	9.18301
rna-XM_017319725.3	5.15302	4.83395	4.3634	5.52418	4.84747	5.42029	4.12704	4.76279	5.17224
rna-XM_030245573.2	7.39576	7.42622	7.74772	7.08239	7.13415	6.95543	6.85106	6.61324	6.86506
rna-XM_036164067.1	7.84379	6.40689	7.1043	6.92997	8.1971	8.02784	8.10045	7.62324	8.0513
rna-NM_134033.2	7.34297	8.44658	7.9028	7.69934	8.36997	8.17626	8.4021	8.55025	8.80683
rna-XM_006502933.4	6.30514	7.03055	10.894	6.9826	6.77835	3.17337	5.43081	7.07077	7.05158
rna-NM_001346759.1	6.56621	6.53467	6.63246	6.05295	6.89677	7.16013	6.74437	6.75574	5.89116
rna-XM_006503079.5	6.95734	7.0057	6.54659	3.62751	7.02511	6.73791	6.85106	7.41679	6.65039
rna-NM_026305.2	10.1198	10.394	10.4323	10.2467	9.95399	9.93201	9.90164	9.68971	9.81086
rna-NR_027976.1	4.99395	5.3389	5.50709	6.40404	6.80063	6.8006	5.66612	6.53623	6.82463
rna-NM_027106.4	8.33505	8.85254	8.74355	7.9358	7.15154	7.14415	6.90155	7.26374	6.79704
rna-NM_133804.2	6.96736	5.29655	6.15565	6.03285	6.47962	6.99165	6.66461	7.04886	6.30184
rna-NM_144920.3	4.81112	4.37817	3.17337	5.52418	3.17337	5.52657	4.99267	6.35043	4.14706
rna-NM_133735.2	9.17536	9.23162	9.15461	8.82409	9.10722	8.88089	8.93065	8.92442	8.87401
rna-NM_001355516.1	8.12373	8.07049	9.03241	7.42378	9.61	8.12847	9.72055	9.70025	9.329
rna-NM_026420.3	8.39912	3.17337	8.74355	8.7353	10.2578	3.17337	10.3994	8.20522	8.83408
rna-NM_033569.3	5.15302	5.60247	5.68273	5.46408	5.75111	5.71676	5.31115	6.36837	6.01791
gene-Rps3a2	10.6145	11.1163	10.683	10.8891	10.4424	10.6925	10.608	10.4572	10.7542
rna-NM_009741.5	8.24356	7.07899	7.2271	7.58183	7.8117	7.52322	7.54567	7.63061	7.46398
rna-XR_004942517.1	7.67119	8.81387	9.5179	8.74443	8.6787	8.17626	9.11855	9.58749	8.4364
rna-XM_011244651.4	6.79785	6.58608	7.67494	6.30762	7.74469	7.77184	7.51368	8.04349	7.36446
rna-XM_036156930.1	5.81368	9.71816	5.77372	6.32415	6.40858	9.85586	5.90731	6.07175	10.0387
rna-NM_133649.2	7.45382	6.92844	7.36891	7.57501	8.02904	8.07903	5.78105	8.49078	8.13041
rna-NM_028299.3	5.29432	3.17337	3.17337	5.36847	5.49446	6.10114	5.4868	5.16797	3.17337
rna-NM_001363271.1	5.15302	5.73266	5.58519	4.5613	6.67356	6.40198	7.76256	4.22835	7.3738
rna-XM_036161825.1	7.19753	5.90724	6.69076	6.49428	6.80063	7.11164	6.65285	3.17337	6.65039
rna-NM_001204973.1	11.4421	12.0422	11.3871	11.5319	10.9252	10.8699	10.9727	10.9628	11.0771
rna-NM_001167879.1	4.76065	5.06093	4.81451	5.30063	5.65422	5.36376	5.07071	6.21801	4.86385
rna-NM_026515.2	6.99702	5.49584	6.40016	5.30063	5.34491	5.67166	5.14416	5.25156	5.26022
rna-NM_009262.3	7.85997	8.50072	8.33912	8.49321	8.35134	8.26734	8.26684	8.44138	8.02787
rna-NM_027481.3	7.50962	6.2451	6.54659	7.26323	7.16016	6.86065	6.96937	7.04886	7.38307
rna-NM_053201.4	8.21871	8.34665	8.84894	8.21527	8.69947	8.44689	9.53106	8.88494	8.02787
rna-NM_001357294.2	4.32259	6.60282	6.66773	6.23946	6.77835	7.26728	6.50345	6.84763	5.45716
rna-NM_028071.3	11.639	12.0207	11.4782	11.4695	11.1922	11.5923	11.4369	11.1017	11.4927
rna-NM_001271388.1	8.01242	7.49909	7.76939	7.81377	8.25439	7.5954	8.33057	7.81669	7.64445
rna-XR_004939578.1	8.71852	8.85946	8.28001	8.8859	8.87141	8.6579	8.85368	8.79276	9.52771
rna-XM_017312662.3	6.25651	4.27823	5.102	6.49428	6.63683	7.11164	6.72203	6.52031	7.05158
rna-NM_007651.3	10.5041	11.5215	11.5642	11.3937	11.1171	11.1335	11.1399	10.9788	10.6979
rna-XM_006501639.3	6.09958	6.03753	6.29838	5.52418	6.43743	6.64977	5.84563	5.88327	5.78063
rna-NM_001081750.1	8.87773	8.08238	8.74081	8.65366	9.6147	9.54329	9.52787	9.43815	9.47243
rna-NM_001012305.2	3.79911	5.00801	6.01525	4.89371	6.1361	6.78001	3.60605	6.58293	4.14706
gene-Rpsa-ps9	8.85104	9.41892	9.04355	9.05195	8.49744	8.44689	8.60364	8.13442	8.81711
rna-NM_001252072.2	5.53791	4.55224	5.48001	5.40111	5.54985	8.10396	5.03231	5.63485	4.92094
gene-Gm6104	4.24116	5.79336	5.81703	5.26533	5.02264	4.19417	4.61687	4.87748	5.56261
rna-NR_133670.1	12.4125	12.1431	5.45236	11.7182	10.0227	3.17337	9.68803	9.60254	10.0805
rna-NM_001166629.2	8.45338	7.93934	8.32091	7.81377	8.54083	7.95662	8.44337	8.94228	8.28659
rna-NM_001308168.1	7.92802	6.96759	4.94611	5.46408	7.63793	7.76143	7.96523	5.36761	5.49325
rna-XR_004942927.1	6.47033	6.32832	6.67929	6.16782	6.66142	6.8006	6.52947	6.68628	7.48136
rna-XM_030250334.2	4.59426	5.00801	4.94611	5.07262	4.74919	5.47449	4.81978	5.36761	4.97545
rna-NM_019405.6	8.8211	8.46938	8.18654	9.02474	9.01794	9.22919	8.94029	8.77957	9.57691
rna-NR_045007.1	5.85833	5.16047	5.33561	4.98643	3.17337	4.87771	4.86539	4.41131	5.12586
rna-NM_001360173.1	8.43192	10.0887	9.71613	9.62153	8.81544	8.75547	8.44337	9.00028	9.10407
gene-Gm14231	4.59426	4.76979	4.55526	4.62395	4.58382	4.47435	4.43563	4.22835	4.60262
rna-NM_001081109.2	5.22561	6.91515	4.81451	6.01246	4.98115	5.99662	4.61687	6.11512	5.80911
gene-Gm15542	8.52268	7.91295	8.0022	8.51472	8.53424	8.0957	8.56677	8.76626	8.95691
rna-NM_026282.6	3.17337	4.95273	5.30472	4.98643	5.52244	5.17779	4.12704	5.36761	4.60262
rna-XM_006521980.4	8.99208	3.17337	3.17337	8.72918	8.48039	8.50417	3.17337	8.42452	8.35406
rna-NM_020584.2	8.16768	8.38554	8.37133	8.10612	8.48039	8.39399	8.33057	8.40318	8.60806
rna-XM_030244918.2	5.03566	4.70185	4.3634	3.17337	4.38845	6.78001	5.03231	3.17337	4.86385
rna-XM_030253403.2	6.98721	8.57829	8.4869	7.29681	3.61406	3.17337	8.23193	7.07077	4.35533
rna-XM_006510947.4	4.76065	3.17337	4.98697	5.63686	4.79936	5.42029	5.78105	5.95699	5.45716
gene-Gm14494	8.47102	9.00387	8.68212	8.46403	8.05231	7.90079	7.97934	7.7906	8.08006
rna-NM_001164580.1	6.38263	7.10261	7.0871	7.35375	7.20248	7.17594	7.07862	6.80898	7.24737
rna-NM_001159617.1	6.23992	6.28733	6.28322	6.83004	7.32243	7.35314	6.79871	7.02661	6.65039
rna-XR_004939312.1	3.17337	3.17337	6.22089	6.37262	6.1361	6.25961	3.17337	5.63485	7.25751
rna-XM_030252809.2	8.28006	4.46888	6.79003	7.1666	7.10766	6.95543	6.79871	6.6429	6.39737
rna-NM_001177601.1	7.475	8.88343	8.88656	8.98421	7.426	6.53129	6.68786	6.23771	7.4196
rna-NM_022319.2	3.17337	5.66913	6.46861	3.17337	6.76708	6.28926	4.49957	6.74212	3.17337
rna-NM_001172146.1	8.18916	7.75843	7.44502	7.83674	7.37515	7.52322	7.46766	7.58577	6.7256
gene-Gm10073	11.0264	11.1534	10.8503	11.5301	10.9539	11.1264	11.0063	11.1096	11.3614
gene-Gm10076	11.4456	12.0033	11.7202	11.4219	11.3015	11.3853	11.3047	10.9686	10.9988
rna-NM_001252530.1	4.59426	9.7427	4.02642	5.40111	5.94687	4.47435	5.73623	4.98211	5.52838
rna-XR_004936381.1	3.79911	3.67708	4.29027	5.5817	5.46587	5.36376	4.55982	7.58577	3.17337
rna-NM_175312.4	8.03633	7.22597	8.54767	7.88712	8.42089	8.52891	8.43997	8.54636	8.25164
rna-XM_006530150.5	7.71336	8.00953	5.93935	8.70445	9.44594	8.58308	9.24643	9.91444	7.61328
rna-XM_017320717.2	6.32099	8.08238	7.91257	8.02847	7.6005	7.61868	7.06098	7.30125	7.44639
rna-NR_045561.1	6.93708	5.53233	6.32822	6.65915	7.07156	7.35314	7.62566	6.83486	7.74852
rna-NM_172581.3	4.15167	4.03729	3.91476	5.22905	5.10166	5.10927	5.51393	5.75087	4.60262
rna-NM_028230.4	4.76065	5.06093	4.98697	5.94941	5.176	4.58973	4.99267	5.50792	5.26022
rna-NM_001384266.1	5.90157	5.85148	5.13811	6.59277	6.22187	6.67232	6.40841	6.19803	6.48683
rna-XM_006520617.4	6.64352	6.68364	6.3429	4.98643	3.17337	3.17337	4.99267	4.98211	5.49325
rna-XM_006495645.5	4.90601	5.56786	5.63484	5.11358	5.92644	5.30469	5.43081	6.0936	4.86385
rna-NM_001358253.1	6.17151	6.01243	3.7809	6.05295	6.43743	5.84374	6.71073	6.72836	6.52109
rna-NM_010131.2	5.9227	6.20157	6.29838	5.8606	5.86329	6.53129	6.24477	5.6941	3.17337
rna-XM_036152934.1	5.53791	4.46888	5.02651	5.76566	5.88466	5.71676	5.4591	7.09235	5.56261
rna-XM_006511443.5	5.42173	4.46888	5.06483	4.26422	6.78953	3.17337	5.96635	5.29141	6.76889
rna-NM_001361902.1	5.48108	8.68734	4.90383	4.98643	4.38845	6.60356	4.81978	4.56584	5.17224
rna-NM_001029873.2	7.84379	8.1347	8.40284	8.01344	8.84236	8.80189	9.15832	9.62484	7.14192
rna-NM_001363812.1	6.22312	6.88818	6.35744	5.19171	6.76708	5.10927	5.78105	7.21542	7.87868
rna-NM_013863.5	8.82933	10.1092	9.22285	8.39226	8.15904	7.86233	8.26684	7.784	8.19493
rna-XR_374081.5	5.964	5.87964	5.95872	6.41948	5.27997	5.36376	5.21359	5.98071	4.60262
rna-XM_030245487.1	6.93708	6.66784	6.40016	7.2025	4.04487	7.36696	7.37807	7.21542	6.89138
rna-NM_175283.3	4.76065	3.17337	4.81451	5.26533	5.46587	5.2428	5.80291	4.98211	5.72183
rna-XR_004942128.1	6.89567	7.25785	7.15469	7.32149	6.67356	6.37464	7.00672	6.59817	7.97372
rna-XM_006501860.2	5.07601	5.37992	4.55526	4.26422	4.74919	4.47435	5.14416	5.16797	5.17224
rna-NR_151538.1	4.99395	3.17337	4.43143	3.17337	4.74919	5.30469	5.37234	3.99763	5.12586
rna-XM_006538988.5	5.71975	5.20745	5.65899	5.22905	5.6791	5.47449	4.12704	5.40411	5.21698
rna-XM_036161552.1	6.66838	6.20157	6.28322	7.30508	7.57499	7.75094	7.69574	7.65252	7.09746
rna-NM_001360917.1	6.63092	6.53467	6.48191	6.59277	7.05316	6.45513	6.50345	6.96941	6.52109
rna-XR_004942485.1	6.00411	5.29655	6.28322	6.35665	6.31832	5.88358	6.5925	6.17776	6.17791
rna-NM_001357372.1	9.59112	9.70093	9.96962	9.13295	10.0109	9.83121	9.83605	10.0163	9.49821
rna-NM_001364260.1	7.18042	5.90724	6.3429	7.14831	7.41884	7.40765	6.3065	7.20556	7.60538
rna-NM_001357533.1	6.081	5.82273	5.95872	5.7156	5.65422	5.76041	5.14416	4.93092	5.17224
rna-XR_003946583.2	6.51222	4.95273	5.27308	5.94941	4.93822	6.22932	5.96635	4.87748	4.74066
rna-NR_153764.1	10.9723	10.8332	10.5432	10.7571	10.4389	10.4663	10.4601	10.197	10.5852
rna-NM_026943.1	8.82659	8.99133	8.78132	9.28038	9.02501	8.99626	8.77506	8.07083	8.7035
rna-XM_036166110.1	6.04309	3.17337	5.95872	5.22905	5.7743	5.47449	6.00435	6.02697	5.75155
rna-NM_027226.4	5.964	7.04281	7.02521	6.68485	6.36418	7.6973	5.73623	5.85779	7.11986
rna-NM_001331195.1	4.70787	5.37992	5.53363	5.99176	6.3027	6.10114	6.3065	6.31385	5.80911
rna-NM_009227.3	9.22609	9.47406	9.24232	9.10488	9.02266	9.0095	8.73684	8.52281	8.5476
rna-XM_017315242.3	3.17337	3.17337	3.17337	4.89371	5.24624	4.95986	6.05948	5.50792	5.83701
rna-NM_028117.3	7.34297	7.18234	6.96053	6.40404	7.16016	7.33918	7.1387	7.11361	6.74018
rna-NM_001362067.1	5.35957	5.25277	4.61215	3.17337	4.23305	4.95986	4.86539	4.98211	3.17337
rna-NM_001271447.1	6.39763	3.17337	5.45236	3.17337	3.17337	4.01246	5.07071	5.21045	7.76987
rna-NM_024175.3	11.1753	11.4402	11.1271	11.1448	10.8556	10.9648	11.0719	10.4665	11.1762
rna-NM_145564.4	4.46738	5.73266	8.56014	7.94639	5.2116	5.03682	4.95171	5.29141	5.596
rna-XM_017314101.3	3.17337	5.82273	3.17337	3.17337	5.27997	6.78001	4.43563	6.74212	8.65847
rna-NM_016806.3	5.76752	3.17337	4.98697	5.36847	5.176	4.69402	5.4019	4.87748	5.69145
rna-NM_009382.3	9.29305	9.67763	9.76945	9.3988	9.38133	9.73352	9.47911	9.41061	9.77967
rna-NM_176921.4	3.17337	6.40689	6.17225	5.97075	6.66142	6.50636	6.5925	6.53623	6.04192
rna-XM_006501526.5	4.81112	3.17337	4.76718	4.17295	5.2116	3.17337	4.95171	5.85779	4.25711
rna-NM_029643.4	6.92684	5.87964	6.32822	6.68485	7.14287	7.43415	6.88157	6.6429	6.94261
rna-NM_010307.3	3.17337	3.17337	8.82847	6.57911	3.17337	3.17337	8.23585	8.55413	8.87401
rna-NM_001166651.2	5.42173	6.65186	6.13886	6.29089	6.06347	5.52657	6.43622	7.56282	5.17224
rna-NM_026876.4	7.23115	5.37992	6.17225	4.94095	7.69822	4.95986	4.6711	4.87748	7.81849
rna-NM_146106.2	5.45174	3.17337	4.71783	3.17337	5.31285	5.17779	5.90731	5.12402	5.69145
rna-NM_008078.2	7.87596	8.17966	8.10373	8.85532	8.33246	7.80264	8.56988	8.69428	8.06862
rna-XM_036156190.1	6.15387	6.66784	6.35744	6.74716	6.17104	6.03234	3.17337	5.72278	6.19934
rna-XM_036162915.1	4.99395	5.70126	5.63484	5.68986	4.6417	4.95986	3.17337	5.57289	3.86828
rna-XM_006496702.2	11.2461	11.2741	11.2663	11.2822	11.186	11.3879	3.17337	11.0193	11.6111
rna-NM_007761.2	6.60539	6.53467	6.77934	6.3405	6.75572	6.62685	6.43622	6.33226	6.68096
rna-XR_004934413.1	5.67024	5.29655	5.102	3.17337	4.84747	5.47449	5.07071	4.41131	4.60262
rna-XM_006527406.4	6.33665	3.17337	3.17337	3.17337	6.87596	6.69452	3.17337	6.70044	6.63486
rna-NM_181418.3	7.88125	5.56786	5.45236	4.73954	8.49744	8.0957	8.6097	7.8861	8.5016
rna-XR_001785494.3	8.60807	6.26637	3.17337	7.9358	8.30562	8.2451	8.79113	8.44973	9.11244
rna-XM_036160879.1	6.36747	5.98687	6.41412	6.14932	5.6791	6.10114	5.66612	5.88327	5.96859
rna-XM_006526294.4	4.90601	4.37817	4.43143	5.43297	5.60305	5.03682	4.61687	5.25156	5.45716
rna-NM_012002.3	8.74195	8.78145	8.70757	8.91314	8.62698	8.22252	8.4535	8.36835	8.21062
rna-NM_175930.6	9.8353	9.25804	9.3735	9.18528	8.7112	8.40739	6.56762	9.02564	9.40363
rna-NM_025887.4	8.40647	8.86291	8.89151	7.97772	8.32484	7.86233	8.05677	8.14475	7.76279
rna-NM_001305800.1	5.9435	5.00801	5.42413	5.03027	3.17337	3.17337	4.36739	4.93092	3.17337
rna-NM_009530.2	9.49787	9.47406	9.60471	10.1262	10.5638	10.1085	10.6701	11.2229	11.07
rna-NM_023203.1	7.88125	8.32681	8.20255	7.97255	7.61933	7.52322	7.62566	7.66694	7.62895
rna-NM_001359629.1	7.6403	7.69009	7.49144	6.86413	7.41165	7.48572	6.99748	7.47536	7.4196
rna-XR_004940679.1	5.15302	6.61935	7.40401	7.42378	5.98683	8.40739	8.68618	8.30069	8.50584
rna-NM_009804.2	8.80728	8.19068	8.36067	8.61436	9.67583	9.13566	9.26572	8.92442	8.82052
rna-XM_006496028.5	7.43952	6.68364	6.72463	7.50498	7.40443	7.35314	7.67276	8.08163	7.62895
rna-XR_003949381.2	6.42716	7.44479	7.00703	6.18607	7.50918	6.8006	7.34934	7.6883	7.20612
rna-NM_009283.4	10.6789	7.70556	8.10798	10.927	8.20543	8.23761	8.41252	7.96403	8.71454
rna-XM_036156137.1	7.93821	8.3951	8.06046	8.57055	7.87573	8.08739	8.14284	7.784	7.91745
rna-NM_001083906.2	6.17151	6.61935	6.06957	6.3405	6.92743	6.64977	6.35108	6.65751	6.41572
rna-XM_030242693.2	4.76065	5.00801	5.102	5.07262	4.74919	5.17779	4.99267	4.87748	4.86385
rna-XM_006500158.5	5.81368	4.46888	5.61024	5.33499	5.49446	3.17337	3.17337	4.22835	4.86385
rna-NM_025560.3	5.81368	4.55224	5.33561	5.46408	5.6791	6.10114	5.17935	5.60423	5.12586
rna-NM_007915.6	7.70144	7.38834	7.58	7.80214	8.07066	8.12034	7.81597	8.15501	8.14137
rna-NM_133705.2	9.14712	9.57839	9.08513	8.56024	8.87141	9.07816	8.96411	8.90025	9.12628
rna-NM_001130408.1	11.1525	11.3467	11.2682	10.935	10.7178	10.9315	10.8035	10.6195	10.7658
rna-NM_153526.5	7.00677	8.22326	7.74772	7.76669	7.50918	7.61868	7.77879	7.23495	7.63672
rna-NM_011650.4	9.04955	9.62582	8.69348	8.5429	8.98691	9.13162	9.25996	8.78288	9.13726
rna-XM_006517275.3	8.11027	8.83158	4.94611	3.62751	8.23419	8.28197	7.26722	3.17337	7.63672
rna-NM_009156.2	9.12723	9.47406	9.50667	9.38719	8.9101	8.89998	8.98522	8.80257	8.92242
rna-XM_006523754.4	8.11027	5.73266	6.62051	5.99176	6.54726	5.80271	7.09605	7.49166	7.49853
rna-NM_016792.4	9.29701	7.89957	7.71458	7.28012	7.08067	7.39422	7.15541	6.74212	7.79091
rna-NM_027439.4	10.958	11.6513	11.1546	10.7144	10.5997	10.882	10.7108	10.1833	10.7781
rna-NM_007883.3	4.85951	4.27823	4.12379	4.62395	4.58382	4.78948	4.86539	5.29141	5.12586
rna-NM_177565.3	6.27291	5.16047	4.71783	6.14932	6.02568	5.88358	5.66612	5.90828	5.49325
rna-XM_030254927.2	3.17337	4.16621	8.49017	3.17337	9.02501	7.97476	8.78043	6.17776	8.75787
rna-XM_006521254.4	7.6403	6.55202	6.62051	7.41617	7.17724	6.95543	6.87147	7.53163	7.06319
rna-XM_006512242.4	5.88012	6.38766	3.7809	6.25681	4.31393	7.00942	4.6711	6.94587	5.62857
rna-NM_019980.2	11.1025	11.4962	11.7599	11.4686	9.16808	6.57988	8.96883	6.56754	8.74357
rna-NM_001368332.1	7.43952	7.72086	7.16292	6.90836	6.77835	7.26728	6.90155	3.17337	3.17337
rna-NM_025992.2	8.30781	6.8607	6.81118	8.47504	7.46819	7.76143	7.37807	7.19563	6.91723
rna-NR_002889.2	5.74385	6.48132	6.46861	6.30762	5.90571	6.06716	6.04135	5.85779	5.75155
rna-NM_021505.3	6.15387	5.85148	6.17225	6.13057	6.42308	6.50636	6.62901	6.93395	6.99207
rna-NM_013755.4	7.11887	3.17337	7.32562	7.13908	7.38986	3.17337	3.17337	7.3378	3.17337
rna-NM_145585.3	7.93821	8.27596	7.764	7.14831	7.99582	7.58362	7.75711	7.73695	7.60538
rna-NM_175752.3	5.39102	7.36903	6.20486	6.18607	6.33378	6.19836	6.21286	6.31385	6.08874
rna-XR_871081.3	7.96338	6.42587	6.85256	7.67404	8.08877	7.61868	8.0744	8.16519	8.29152
rna-NM_001164216.1	9.71911	9.44215	9.24426	9.52067	9.65017	9.58222	9.24448	9.03677	8.35406
rna-XM_006497438.4	6.32099	7.28904	8.6649	7.02336	4.69672	7.20704	5.64192	6.50421	3.17337
rna-NM_001291865.1	10.8334	12.0227	11.6614	11.1528	9.54595	9.59399	3.17337	3.17337	3.17337
rna-NM_028850.5	8.60168	8.82452	9.06995	8.74139	8.31718	7.89127	8.25143	7.75055	8.45846
rna-NM_011239.2	8.78207	8.91034	8.78398	8.92121	8.30174	8.06217	8.18807	7.8861	8.8307
rna-NM_009930.2	3.17337	3.17337	3.17337	4.62395	5.7743	5.76041	5.4019	5.93285	5.86435
rna-NM_019715.2	7.264	6.71472	6.37182	7.03337	6.39393	7.11164	7.16369	7.27321	7.00417
rna-XM_036157376.1	6.081	4.62958	5.81703	5.76566	5.2116	6.1667	5.21359	6.15719	5.21698
gene-Gm12501	4.65251	5.3389	5.39528	5.43297	4.58382	5.17779	4.86539	5.25156	5.49325
rna-XR_003946419.2	8.87243	8.85601	8.81293	8.62099	8.43157	8.58898	8.4021	3.17337	8.94759
rna-XM_006531082.2	5.88012	5.37992	6.0336	5.94941	6.0447	5.67166	6.05948	6.2952	5.86435
rna-NM_134189.2	6.89567	5.4197	6.0517	7.02336	7.64407	7.49833	7.62566	7.65252	7.83209
rna-NM_001368287.1	5.71975	5.16047	6.65607	5.74086	6.34906	7.82282	5.82444	6.58293	6.41572
rna-NR_152856.1	6.84216	7.04281	6.82164	6.43476	6.67356	6.34675	6.87147	6.07175	5.86435
rna-XM_036155421.1	7.45382	7.16001	6.96995	7.2025	7.2108	7.12799	7.52014	7.92259	6.90436
rna-NM_020256.2	3.17337	7.21519	7.33293	7.34575	7.65019	7.38066	7.57076	4.93092	6.82463
rna-NM_020578.3	9.41467	9.52934	9.39628	9.34581	8.83434	8.84193	9.06889	8.79276	9.27783
rna-NM_026950.4	8.73028	7.55996	8.78398	7.99824	8.12872	5.03682	8.46691	8.08163	8.612
rna-NM_001146299.1	3.17337	5.25277	5.13811	5.55325	4.6417	3.17337	5.07071	3.17337	5.21698
rna-XM_030250829.1	5.964	5.90724	6.3429	6.61969	6.15368	6.22932	6.40841	6.11512	6.74018
rna-XM_011239961.2	8.7126	8.58666	8.54453	9.00715	8.35134	8.67463	9.02653	8.67304	8.32072
rna-NM_026833.1	4.99395	7.52549	7.42466	6.81849	6.22187	7.12799	3.78302	6.93395	7.01617
rna-NM_013841.3	6.8638	6.03753	6.38606	6.86413	6.85484	6.8006	7.07862	7.46714	6.95514
gene-ND2	11.2379	11.9552	11.5607	12.9738	11.3506	10.9152	11.6654	11.721	12.4241
gene-ND3	9.08663	9.44905	9.46915	11.398	9.33659	8.7917	9.5406	9.47747	9.06148
gene-ND1	12.0318	13.1887	12.8551	14.1999	12.3685	11.9214	12.6206	12.7415	12.3944
gene-ND6	10.1875	11.1569	10.6499	11.2225	9.95152	10.0542	10.4313	10.4023	11.5554
gene-ND5	9.87027	10.7895	10.272	11.5279	9.80186	9.82873	9.99592	10.6935	10.9576
rna-NM_009425.2	8.73321	7.11427	6.80065	7.66765	8.27431	8.15256	8.13025	7.3468	8.27172
rna-XM_030249939.2	6.22312	4.76979	6.40016	5.03027	6.00639	6.25961	3.17337	5.98071	5.56261
gene-Gm11889	5.79079	5.16047	5.30472	6.05295	5.79709	5.62501	5.94695	5.72278	6.39737
rna-NM_001193666.1	6.61821	5.16047	5.89977	5.88335	5.72753	5.10927	4.43563	4.76279	5.02764
rna-NM_172422.3	5.61886	3.17337	5.42413	6.29089	5.24624	3.17337	6.12973	5.93285	6.04192
rna-XM_006502405.5	3.17337	5.90724	6.40016	7.98288	6.33378	8.19958	4.86539	3.17337	5.30205
rna-XM_036155449.1	6.60539	3.17337	6.49508	6.40404	3.17337	6.50636	6.66461	6.62815	6.22045
rna-NM_001214911.2	5.83618	5.9343	5.20737	5.22905	6.02568	6.10114	6.00435	6.02697	6.04192
rna-NM_138953.2	7.94833	6.83268	7.67494	7.93047	7.22729	6.93697	7.24399	7.30125	7.05158
rna-XR_003953684.2	4.53271	3.67708	4.55526	5.40111	4.93822	4.87771	5.24693	3.17337	5.3819
gene-Gm4540	7.88125	8.03422	7.64594	7.25471	7.49565	7.35314	7.24399	6.58293	7.67496
rna-XM_006533548.3	4.76065	3.17337	6.40016	7.01328	7.78971	5.67166	7.83679	7.61582	7.68998
rna-NR_156743.1	8.43552	8.14607	8.43028	8.26266	8.51763	8.60652	8.73408	8.40747	8.12491
rna-XM_006540826.5	6.70488	7.03055	4.66624	6.40404	7.08067	7.11164	7.09605	7.70935	5.07771
rna-NM_021336.4	8.11477	8.17411	7.87809	7.69934	7.4751	7.26728	7.24399	7.31047	7.05158
rna-NR_152246.1	6.91652	6.55202	5.9197	6.46484	7.01564	6.88012	4.77232	7.82314	5.86435
rna-NM_147778.4	8.92968	8.44198	8.63868	8.64068	8.82086	9.04424	8.81228	8.70129	8.66608
rna-XR_382078.3	6.70488	5.53233	6.89278	4.73954	5.54985	7.5954	7.66113	7.22522	6.37878
rna-NM_011448.4	9.29701	9.85254	9.62116	8.95043	9.52117	9.97764	10.02	10.04	9.85972
rna-XM_036163253.1	7.96836	6.80409	7.61035	7.71182	7.78416	7.22234	7.53933	7.38222	7.99804
rna-XM_036158551.1	3.17337	3.17337	8.32822	6.11157	9.26279	5.76041	3.17337	9.19165	3.17337
rna-NM_001359449.1	5.18983	5.20745	5.72898	5.30063	5.2116	5.88358	5.31115	5.75087	4.67376
rna-NM_001205391.1	7.79975	7.6019	7.98842	5.33499	7.88094	8.15256	7.67276	4.56584	5.99347
rna-NM_020275.4	7.52323	6.74514	8.19056	5.03027	5.46587	5.17779	5.14416	5.21045	5.26022
rna-NM_009730.3	7.43232	7.19337	7.03422	7.80796	7.88094	8.23009	8.13866	8.31904	7.96141
rna-XR_385319.4	8.57582	8.33179	8.6764	8.2456	8.63008	8.28197	8.80174	8.77957	8.36344
rna-NM_018851.4	9.49615	8.68734	8.90623	9.5999	7.20248	7.40765	7.00672	6.55197	6.50407
rna-NM_025945.3	7.25585	6.94161	7.03422	7.7242	7.15154	7.23747	7.18012	6.87283	7.11986
rna-NM_145076.4	5.85833	3.17337	5.27308	3.17337	7.76738	7.38066	6.5423	7.39094	8.09704
rna-NM_025912.4	7.10079	6.58608	6.52107	6.35665	5.94687	6.95543	7.07862	6.75574	7.17438
rna-XM_030255504.2	6.00411	7.28904	7.4651	3.17337	8.22603	3.17337	8.15532	5.7784	8.07435
rna-XM_030243045.2	5.18983	6.61935	4.94611	6.16782	6.8864	5.30469	7.15541	3.17337	5.21698
gene-Gm6794	5.5098	5.20745	4.94611	4.49476	4.84747	4.47435	4.81978	4.98211	6.91723
rna-XR_001780011.2	4.70787	3.17337	6.83202	4.73954	6.98684	6.62685	4.72283	4.93092	6.37878
rna-NM_001347382.1	10.0546	9.45134	9.5163	9.67342	8.09774	8.13654	7.8212	7.73695	8.22098
rna-XR_004938585.1	4.59426	4.89481	3.17337	5.30063	5.24624	4.19417	3.17337	7.19563	3.86828
rna-NM_001085385.1	4.59426	6.36816	6.76856	8.17079	7.13415	7.07837	7.71836	4.93092	7.2269
gene-Psenen-ps	8.78207	9.25542	8.75715	8.7951	8.39201	8.65228	8.76695	8.25851	8.94447
rna-NM_007682.3	9.32637	9.79956	10.0314	9.23793	9.385	9.55237	9.40449	9.27389	9.39451
gene-Gm6335	6.23992	6.48132	6.22089	6.03285	6.33378	6.1343	6.42238	6.17776	6.50407
rna-NM_175104.5	8.32732	4.89481	4.66624	8.1753	4.84747	8.3108	8.70043	8.45389	5.45716
rna-NM_175287.4	8.07378	8.15735	7.82218	4.79322	7.76738	7.91964	7.8212	7.73695	7.58945
rna-XM_006521769.4	6.41248	6.56915	6.50814	6.80685	6.20513	7.29647	7.28251	7.8037	7.14192
gene-Mif-ps3	6.22312	6.40689	6.41412	5.99176	5.46587	5.30469	5.43081	5.36761	5.34258
gene-Gm8599	7.29611	7.79503	7.21132	7.32149	6.96731	6.73791	6.96937	6.52031	6.79704
rna-XM_006510073.4	5.69522	7.27872	6.9415	7.12979	7.52924	7.00942	5.8665	6.0936	5.99347
rna-XM_006514625.5	9.73087	9.04997	9.07864	9.32162	9.50273	9.69306	9.69374	9.50577	9.88924
rna-NM_172260.3	6.71684	5.53233	5.79555	6.41948	7.64407	7.14415	7.50068	7.2542	8.11937
rna-NM_008390.2	7.50276	12.1338	11.764	7.9358	5.96699	5.30469	5.82444	8.986	6.39737
rna-NR_153435.1	7.25585	6.80409	6.9415	6.7101	6.74427	7.22234	6.98817	6.86029	6.39737
rna-NM_001285907.1	4.53271	4.89481	4.66624	5.03027	4.84747	4.78948	4.86539	4.87748	5.17224
rna-NM_001159724.1	7.74274	8.11747	7.67494	7.71802	6.67356	7.25245	6.8916	6.65751	6.82463
rna-XM_030246651.1	8.43911	8.00953	7.53006	8.01344	7.57499	7.90079	7.79484	7.004	7.42858
rna-NR_104287.1	7.1631	7.39791	7.38305	7.07272	6.11829	6.67232	5.80291	7.45887	6.45173
rna-XM_030247756.1	5.85833	5.73266	6.35744	5.22905	5.49446	5.52657	5.59218	5.72278	5.96859
rna-XM_006526428.3	7.87065	7.73601	7.69773	7.28849	7.56855	7.74037	7.72954	7.61582	7.50704
rna-NM_009716.3	5.69522	7.72846	7.70337	6.22189	4.52266	9.52497	5.75882	5.40411	5.17224
rna-NM_001361932.1	5.83618	5.45832	5.63484	5.81396	5.31285	5.10927	4.77232	3.17337	8.91924
rna-XM_030253511.2	7.04512	7.13732	3.91476	6.56532	6.20513	3.17337	7.56453	6.65751	7.23717
rna-XR_379397.2	3.17337	9.2236	9.01666	9.84726	3.17337	10.4901	3.17337	10.1311	3.17337
rna-XM_036165204.1	5.81368	5.60247	4.71783	5.5817	6.42308	6.28926	5.6899	6.2952	5.596
rna-XR_004942930.1	3.17337	3.17337	4.12379	6.57911	7.06239	7.20704	3.91733	7.36462	7.80477
rna-NM_001368667.1	4.95077	3.17337	5.50709	5.90572	3.17337	7.33918	3.17337	3.17337	6.95514
rna-NM_008944.2	10.9322	11.5166	11.114	10.6519	10.303	10.4258	10.2953	9.87159	10.0862
rna-NM_029305.2	5.32735	7.26832	6.84233	4.79322	5.02264	3.17337	3.17337	4.7009	3.17337
gene-Gm7867	6.51222	7.18234	7.06969	7.11102	6.50706	6.40198	6.5925	6.0936	7.05158
rna-XM_006517305.5	6.02373	7.33955	8.24567	6.03285	7.76738	5.42029	7.79484	8.39887	5.12586
rna-NM_198614.3	5.18983	4.76979	4.90383	5.33499	5.43665	4.95986	5.43081	5.6941	5.3819
rna-XM_011249655.4	8.50567	8.58248	7.9271	8.56712	7.97649	7.43415	7.91718	8.12402	8.58016
rna-XM_006527629.5	6.656	5.9343	6.79003	6.23946	6.96731	6.53129	7.18012	7.20556	6.58722
rna-NM_026402.3	8.11926	8.07645	8.22231	7.95691	8.13309	8.33205	8.38454	7.89837	8.1684
rna-NR_027901.1	7.93821	8.63989	7.78543	8.34501	8.68169	8.0365	7.97465	9.87159	8.96001
rna-NM_001081114.2	6.33665	5.96084	5.81703	6.29089	9.53444	9.83121	6.04135	6.19803	9.94653
rna-NM_001113368.1	6.52591	7.49909	7.09572	6.44988	6.94751	7.32509	6.80934	6.95768	6.50407
rna-NM_199042.2	7.35063	6.30797	6.44162	6.27395	7.11655	6.60356	7.23616	7.12413	7.08613
rna-XM_006515853.5	5.9842	6.88818	6.77934	6.03285	7.08973	7.35314	6.04135	6.56754	6.46939
rna-NM_153780.3	5.9842	3.17337	4.98697	5.36847	5.49446	6.06716	5.66612	6.0936	5.34258
rna-NM_011341.5	10.1108	10.1703	9.91243	9.79552	9.90249	10.149	9.97263	9.70897	9.98653
rna-XM_030242740.1	7.56332	6.03753	6.12186	3.17337	3.17337	7.25245	3.17337	7.39094	6.86506
rna-NM_010122.2	5.22561	3.67708	4.94611	6.61969	5.02264	5.62501	5.03231	5.7784	5.89116
rna-NM_001142727.1	7.74274	8.21788	8.39937	8.10612	7.947	8.07063	3.17337	3.17337	7.76279
rna-NM_009104.2	5.56544	5.4197	5.72898	4.49476	4.58382	5.36376	4.6711	4.56584	4.35533
rna-XR_003948066.2	7.28014	7.79503	4.3634	7.68041	7.40443	7.48572	4.61687	4.87748	4.86385
rna-NM_177721.4	6.7287	6.71472	7.16292	7.23752	7.16016	7.29647	7.37094	7.64525	6.696
rna-XM_036163123.1	8.19342	5.00801	4.86001	5.90572	5.84157	6.60356	6.3065	6.2952	6.11157
rna-XM_006524891.5	5.61886	3.17337	4.98697	3.17337	8.1111	5.99662	8.24366	8.30069	5.12586
rna-XR_004940158.1	8.36177	7.80942	8.14158	7.73035	7.97649	7.719	7.95574	8.17026	7.38307
rna-NM_133674.1	5.26042	7.29928	4.86001	4.89371	5.54985	5.36376	4.99267	5.7784	7.16364
gene-Gm40238	7.4105	8.60736	8.83105	7.80214	5.06277	5.36376	5.8665	5.80537	5.42006
rna-XM_030248493.2	7.05455	6.96759	8.13743	7.43136	8.15474	7.91964	8.24366	8.88494	7.25751
rna-NM_001256055.1	9.74398	9.59091	9.24619	9.64283	9.27864	9.43949	9.48242	9.02564	10.1821
rna-XR_387568.4	5.53791	3.17337	7.89297	4.4237	4.45775	8.14457	4.81978	4.98211	5.17224
rna-NM_008094.6	8.66435	8.06451	3.17337	6.2041	3.17337	7.39422	7.60759	7.63795	7.74852
rna-NM_001163170.1	7.58944	6.55202	6.35744	7.21134	6.74427	6.78001	6.90155	6.47146	6.7256
rna-NM_001362682.1	8.27605	7.31956	7.13809	7.42378	8.20957	7.88169	8.24366	7.92259	7.76987
rna-NM_028013.3	9.40736	8.70281	8.56634	8.5324	8.05231	8.01036	8.05233	8.14475	8.34461
rna-XM_006521751.5	9.98884	10.1577	10.1371	10.1181	10.2647	9.9955	10.2792	10.492	10.6489
rna-NM_013852.2	7.20601	6.60282	7.02521	7.28012	7.54246	7.6529	7.29763	7.13456	6.8109
rna-NM_009450.2	10.4384	10.0975	10.5258	10.1878	10.1839	10.2285	10.0074	10.1062	9.96974
rna-NM_021880.4	10.3022	9.86977	9.58654	10.1505	8.93783	8.93279	8.85113	8.84117	9.08718
rna-NM_011669.3	6.32099	7.66657	5.42413	7.5334	6.1361	7.95662	8.12603	6.04954	8.37741
rna-XM_006540580.4	7.264	5.76335	5.63484	7.69306	8.68169	8.36679	8.49007	8.92741	6.63486
rna-NM_133685.2	9.67263	10.6043	10.2365	9.54525	9.74878	9.81622	9.81263	9.39557	9.51303
rna-XR_877682.3	5.42173	4.95273	5.39528	5.15325	6.10025	5.42029	5.75882	6.13631	5.56261
rna-NM_178056.3	4.59426	9.14931	8.74355	4.79322	8.15474	8.36679	8.40906	7.92858	8.84417
rna-NM_001080780.1	5.6448	6.8607	5.68273	5.94941	6.75572	6.25961	6.35108	6.19803	6.26174
rna-NM_001252684.1	5.83618	3.17337	3.17337	7.2717	7.25168	3.17337	6.84074	8.09234	3.17337
rna-XM_011242442.4	8.32732	9.1208	9.29921	9.26143	9.85173	8.37364	10.3084	10.3686	8.84417
rna-NM_026242.3	11.4022	11.5677	11.6801	11.343	11.4607	11.4961	11.53	11.1797	11.3742
rna-NM_001348260.1	7.51644	7.24731	6.96995	6.25681	7.09872	7.07837	6.84074	6.59817	7.09746
rna-NM_008312.4	6.60539	6.92844	7.05206	5.22905	7.09872	7.28195	5.4868	6.04954	5.3819
rna-NM_025485.3	7.08247	5.63621	6.35744	3.17337	6.4657	3.17337	3.17337	6.38608	6.35993
rna-XM_006498682.1	5.15302	4.95273	4.90383	4.62395	4.6417	5.03682	4.81978	5.93285	4.60262
rna-NM_019773.2	3.17337	8.06451	8.03387	7.66123	3.17337	8.06217	7.87251	3.17337	7.36446
rna-XM_006517409.5	7.14557	5.53233	7.41781	7.84242	7.96182	7.87204	7.81597	8.05449	8.4845
rna-XM_036160669.1	5.67024	5.11168	5.58519	5.88335	5.70353	5.52657	5.90731	5.43962	4.25711
rna-XR_868886.4	6.63092	5.82273	5.97782	6.46484	6.62438	6.53129	6.2289	6.79585	6.35993
gene-Gm5537	9.7727	9.88172	9.82086	9.31142	8.13744	8.33907	8.23193	8.14989	8.22098
gene-Gm5539	8.9449	8.9003	8.92804	9.27829	9.24676	9.25536	9.22687	9.03677	9.18565
rna-NM_001357512.1	6.52591	6.1102	6.64431	6.73491	6.73273	6.03234	6.69934	7.31047	6.60328
rna-XM_030247437.2	3.17337	5.11168	4.55526	4.68323	4.58382	4.69402	4.99267	5.33006	4.92094
rna-XM_030246535.2	7.09166	7.32959	7.82735	4.4237	6.94751	7.60709	7.42701	8.14989	7.28747
rna-NM_011698.1	6.71684	6.44459	6.65607	7.092	6.9375	7.43415	7.21241	7.53163	7.15282
rna-NM_199145.2	9.57816	8.87662	8.94953	9.21185	8.27431	8.75547	8.75061	8.21015	8.86083
rna-XM_030253652.2	5.56544	4.89481	5.55966	5.46408	3.17337	3.17337	3.17337	6.45479	6.79704
rna-XM_006500216.5	6.11791	6.20157	6.26789	6.27395	7.15154	6.95543	6.78801	6.72836	6.86506
rna-XM_006520926.4	6.06217	6.30797	6.2524	6.78327	6.69752	6.86065	3.17337	7.09235	6.7256
rna-XM_030253143.1	7.17179	11.7402	3.17337	9.16276	5.176	4.87771	3.17337	6.07175	11.6817
rna-NM_023210.4	8.08757	9.20742	8.9707	8.341	7.50918	7.42096	7.60152	7.15521	7.48997
gene-Gm7368	5.74385	5.60247	5.42413	5.66362	5.79709	5.62501	6.2289	5.93285	5.99347
gene-Gm7363	5.9842	6.48132	6.10465	5.66362	5.43665	5.71676	5.61728	5.16797	6.04192
rna-NM_172713.2	7.69544	7.96526	7.89789	7.29681	6.57343	6.67232	7.00672	6.56754	7.48997
rna-NM_023716.2	9.75841	9.75202	9.65933	9.75395	9.01084	9.74412	9.51018	9.24539	10.1768
rna-XM_036157397.1	9.27308	8.51394	8.85907	9.28456	9.23055	8.88089	9.51018	9.44024	10.4889
rna-NM_025337.3	4.59426	4.03729	7.32562	7.58862	7.91689	4.47435	8.23976	4.93092	6.19934
rna-NM_011300.3	8.77641	9.33701	8.91839	9.11195	8.67271	8.67463	8.60061	8.35507	8.60806
rna-NR_151737.1	3.17337	6.32832	3.17337	3.17337	7.72744	3.17337	8.02085	7.84866	8.22098
gene-Gm7589	7.01646	7.35927	7.33293	7.39308	6.78953	6.91827	6.78801	6.6429	7.90465
rna-XM_036158692.1	4.53271	3.17337	3.17337	5.19171	5.06277	3.17337	5.3421	5.40411	3.17337
rna-NM_001311109.1	8.94994	9.12941	9.09801	8.9319	9.28454	9.23672	9.39225	9.20897	9.15897
rna-NR_153321.1	6.51222	5.3389	5.24064	6.32415	6.63683	6.1667	5.5666	6.87283	6.89138
rna-NM_001289630.1	5.9435	5.85148	5.95872	6.0923	6.90706	6.89932	7.14708	6.71447	7.01617
rna-NM_133749.2	9.01871	6.2451	3.17337	3.17337	5.79709	7.0951	5.84563	5.21045	8.44527
rna-XM_036155098.1	5.5098	3.17337	3.17337	5.33499	3.17337	5.10927	5.10797	4.22835	4.92094
rna-XR_004940132.1	6.80906	7.0057	7.1043	7.33771	7.03452	6.91827	6.84074	7.20556	6.52109
rna-NM_001286608.1	9.75697	9.45819	9.60771	9.57112	9.31753	9.47174	9.39225	3.17337	9.33616
gene-Gm5981	4.32259	4.83395	5.42413	5.03027	5.13938	5.17779	4.6711	4.22835	5.96859
rna-XM_036158555.1	7.28815	6.0864	6.37182	5.99176	6.23842	6.19836	6.99748	6.99256	6.46939
rna-NM_138665.2	5.85833	5.25277	5.87955	4.89371	6.06347	6.10114	6.12973	5.7784	6.15615
rna-XM_006497948.5	7.22282	7.20432	7.72571	6.35665	7.46819	9.66544	7.76256	7.74376	3.86828
rna-XM_011244658.3	5.964	6.48132	5.93935	6.01246	6.17104	6.19836	6.09505	6.2952	5.49325
rna-NM_019776.2	9.25488	4.16621	4.55526	9.07625	4.38845	4.58973	4.55982	4.56584	4.92094
rna-NM_001145801.1	8.42831	7.75099	8.13326	9.28665	5.43665	5.57669	5.14416	5.16797	5.86435
gene-Gm7926	8.93477	9.20198	9.04133	9.17632	8.51428	8.98289	8.83571	8.049	8.38203
rna-XM_006498991.5	3.93682	7.11427	7.764	4.94095	3.79422	4.01246	5.21359	3.99763	7.83209
gene-Gm9387	4.59426	4.03729	4.02642	4.62395	4.6417	3.77082	4.61687	5.07849	3.86828
gene-Gm9386	7.49587	7.32959	6.87281	7.12043	6.9965	7.23747	7.05208	6.90982	7.98593
rna-NM_001358971.1	6.89567	6.48132	6.92221	6.56532	6.70935	6.8006	6.96937	6.11512	7.21655
rna-NM_007531.2	9.70428	9.97067	9.80261	9.33779	9.04369	9.3521	9.13753	9.20651	8.74716
rna-XM_006509485.5	4.95077	4.89481	4.90383	5.19171	5.176	4.58973	4.72283	4.76279	3.17337
rna-NM_001161822.1	7.11887	7.19337	7.62231	6.88642	7.17724	7.64159	7.16369	7.44219	6.76889
gene-Rpl30-ps9	8.59526	8.7295	8.61197	8.74443	8.57976	8.70208	8.66016	8.31448	8.59617
rna-NM_016850.3	8.70665	8.93019	8.1581	9.46471	7.28356	7.81276	7.18012	6.87283	4.02049
rna-XM_030244102.1	9.2385	8.71431	8.76794	8.54986	9.11608	9.5311	9.4097	9.07775	9.8811
gene-Gm8034	10.7729	10.5476	10.3876	10.0753	9.43006	9.26644	9.32026	8.88494	9.15087
rna-NM_013706.2	10.6018	10.8833	10.3468	10.6381	9.48405	9.80867	9.81131	9.17664	9.79881
rna-XM_017317970.3	8.98473	9.21553	8.8816	9.29909	5.79709	5.76041	8.66016	5.12402	5.94326
rna-XM_006526150.3	8.56272	8.77414	8.60597	4.17295	8.6667	8.87608	8.70327	8.26799	4.14706
gene-Rab11b-ps2	8.28006	8.75199	8.39937	8.02847	8.18453	8.07903	8.23193	7.81669	7.6674
rna-NM_011198.4	10.0191	9.71816	10.0884	9.98582	6.86544	7.35314	6.39429	6.31385	6.28193
rna-NM_007672.2	6.5529	6.98041	7.12971	7.06298	6.59913	5.71676	6.5423	6.19803	3.17337
rna-XM_036157159.1	8.26799	8.08238	7.96983	8.37276	8.64545	7.54769	8.59451	8.71867	8.5476
rna-NM_001081269.2	7.5699	6.55202	7.00703	7.18467	7.31474	7.97476	7.5072	7.7301	7.48136
rna-NM_133783.2	7.01646	6.99311	7.1043	7.19361	6.9375	7.04431	6.88157	6.87283	7.11986
rna-XM_006525926.4	7.37337	5.3389	5.75153	6.50878	4.23305	4.01246	3.17337	4.12101	4.74066
rna-NM_146253.5	6.63092	6.99311	7.02521	5.94941	7.34526	6.55579	7.05208	7.19563	6.41572
rna-XR_003947992.2	5.6448	4.89481	5.17321	4.5613	5.52244	5.62501	5.84563	3.17337	5.99347
rna-XM_030249493.1	7.13673	7.61015	7.54899	7.01328	7.2677	7.14415	7.47433	6.76924	7.49853
rna-XM_017312371.3	4.53271	3.17337	4.12379	4.98643	5.2116	4.69402	6.35108	6.31385	5.45716
rna-XM_011240202.3	7.36583	3.17337	7.376	6.92997	6.31832	6.8209	6.78801	5.90828	7.31683
rna-XM_006511637.4	9.66805	9.09171	8.64747	10.1833	10.7258	10.1825	10.9774	10.7083	10.7676
rna-NM_001163032.1	4.59426	7.29928	7.70337	7.73647	7.48198	8.3108	4.6711	7.49166	7.10871
rna-XM_011249825.4	5.9435	5.66913	3.17337	6.16782	5.13938	3.17337	4.86539	4.87748	5.12586
rna-XR_003948574.2	5.56544	5.76335	6.17225	4.34724	5.70353	7.92898	8.59756	6.19803	5.21698
rna-XM_030249770.1	3.17337	4.70185	5.20737	5.76566	6.63683	6.22932	6.50345	3.17337	6.91723
rna-NM_021550.3	7.36583	6.1102	6.22089	7.54042	7.17724	7.04431	6.93101	6.76924	6.53791
rna-XM_030252868.1	6.11791	6.81846	6.63246	3.17337	4.58382	6.93697	6.1125	7.36462	7.02807
rna-XM_036161235.1	6.5529	3.17337	6.95105	6.47963	7.11655	7.02697	7.52014	7.63795	8.14682
rna-XM_006517998.2	8.70068	7.48122	7.93191	8.77148	8.69356	8.35299	8.92581	7.38222	8.79994
rna-NM_001163741.2	5.26042	3.17337	3.17337	4.4237	4.79936	3.17337	5.10797	5.03124	5.80911
rna-XM_036159369.1	4.39761	5.29655	5.24064	5.36847	4.04487	5.88358	5.37234	5.03124	3.86828
rna-XM_006539936.4	7.04512	6.68364	6.23673	3.17337	3.17337	6.55579	3.17337	3.17337	6.13404
rna-XM_036158755.1	6.42716	5.3389	5.33561	5.81396	5.84157	5.95996	6.19662	9.85125	6.06553
rna-XM_006510697.5	3.17337	5.00801	5.27308	6.03285	6.52059	5.99662	6.43622	6.93395	6.01791
rna-NM_001003918.2	7.97826	8.63182	8.60597	8.25841	8.09326	8.01913	7.96523	8.16519	8.82392
rna-NM_009461.2	7.73691	7.04281	7.2658	7.31331	7.89646	7.22234	7.66696	8.25851	7.69743
rna-XM_006527698.4	8.68867	8.19616	7.80654	3.17337	8.83702	9.02698	8.56366	3.17337	8.94759
rna-NR_015349.3	8.55612	3.17337	8.27245	8.52888	8.57013	8.25996	8.76424	8.49078	8.9631
rna-XM_017320114.2	7.00677	4.03729	7.56147	6.81849	4.23305	3.17337	4.6711	3.17337	4.92094
rna-XM_006527357.5	3.17337	3.17337	5.33561	3.17337	6.22187	6.3183	3.17337	6.33226	5.86435
gene-Gm12906	5.35957	5.73266	5.50709	6.01246	5.7743	5.9223	5.73623	5.83183	5.75155
rna-NM_009196.4	9.21357	9.52934	9.84398	9.67023	11.5173	10.9636	11.2859	10.6838	11.8992
rna-NM_028056.2	5.42173	5.76335	6.06957	5.15325	5.2116	5.99662	6.05948	5.90828	5.26022
rna-XM_006535399.5	7.23115	6.20157	7.03422	6.47963	5.92644	6.1343	6.27597	6.04954	4.97545
rna-XM_006504689.4	3.17337	3.17337	5.81703	5.26533	5.92644	4.78948	5.64192	6.48793	5.596
rna-NM_145959.3	7.50276	4.76979	7.98379	6.44988	7.45426	8.07903	7.02504	7.65252	7.0747
gene-Gm9067	8.89874	9.46954	8.8413	8.9919	8.17184	8.45337	8.29342	8.07083	9.58896
rna-NM_025636.5	5.22561	4.62958	4.66624	4.68323	8.78523	5.36376	8.98289	8.822	4.97545
rna-XM_036152454.1	4.59426	4.16621	4.90383	5.26533	5.2116	4.69402	4.72283	4.76279	5.75155
rna-XR_004936933.1	3.17337	3.17337	3.17337	3.17337	6.18819	6.50636	4.72283	6.58293	6.68096
rna-XM_006517978.4	8.64583	7.92621	8.34994	7.6483	8.22603	8.05366	8.20817	8.35951	8.25668
rna-NM_001177427.1	7.12783	7.37872	7.3402	7.15749	7.56855	7.29647	7.37807	7.31047	7.00417
rna-XM_006511051.5	9.97531	6.77492	6.93189	6.35665	6.39393	9.40316	6.96937	5.12402	6.57097
rna-XM_006532451.2	4.70787	5.63621	4.43143	5.07262	4.8937	4.47435	5.21359	4.76279	5.3819
rna-NM_001362374.1	5.29432	7.25785	7.21132	7.56816	7.61933	7.61868	7.70143	7.57051	7.6674
gene-Gm6344	6.69281	7.40741	6.96995	6.92997	6.33378	6.19836	6.61695	6.33226	6.71088
gene-Gm6341	7.6151	8.25511	7.7801	8.23268	7.57499	7.54769	7.48757	7.38222	7.68249
rna-XM_036160129.1	8.40647	7.53419	7.84276	8.71377	7.12538	7.6529	7.59542	7.53949	8.24149
rna-XM_036163153.1	5.964	8.4046	3.17337	3.17337	7.16016	5.47449	7.41319	6.95768	3.17337
rna-XM_036162294.1	6.85302	3.17337	6.64431	6.68485	6.20513	7.42096	7.51368	6.59817	7.45521
rna-XM_017313402.3	5.03566	5.00801	4.29027	4.5613	4.6417	4.47435	4.77232	4.49144	4.35533
rna-XM_011245456.4	5.5098	3.17337	4.3634	4.84453	5.62888	5.62501	5.66612	5.6941	5.3819
rna-XM_006499265.4	7.5959	7.81656	8.21838	7.2717	7.83336	7.96572	7.54567	7.56282	7.32648
rna-NM_001357869.1	6.92684	5.37992	3.60453	6.35665	4.74919	7.0951	5.43081	7.11361	6.76889
rna-NM_177790.4	8.22288	7.6265	8.00677	7.06298	3.17337	7.11164	7.46766	6.96941	7.03987
rna-NM_133670.2	8.52268	7.69785	7.92227	8.64068	8.02904	8.47263	8.24366	8.30069	7.88522
rna-NM_001308091.1	7.51644	7.14871	7.21132	7.21134	7.14287	7.40765	6.62901	6.40358	7.2269
rna-NM_007570.2	9.82437	8.93675	9.15461	10.6117	8.74012	8.42728	8.95463	9.06422	9.06148
rna-XM_006509848.5	6.17151	5.37992	5.39528	5.90572	5.81951	5.57669	5.78105	6.35043	5.72183
rna-NM_011591.5	8.32344	4.76979	7.32562	7.97772	8.1111	8.17626	8.18402	7.784	5.45716
rna-NM_001001160.3	6.11791	6.42587	7.0609	6.73491	7.07156	6.60356	6.98817	7.65975	6.08874
rna-XR_004938035.1	3.17337	5.25277	5.81703	6.44988	7.1857	3.17337	3.17337	3.17337	8.29152
gene-Gm6467	8.13705	8.75199	8.62983	8.13419	7.59417	7.48572	7.47433	7.38222	7.72684
rna-XM_036165322.1	8.98228	7.29928	8.10373	6.87532	8.36997	8.31792	8.24755	5.63485	8.70719
rna-NM_001190258.1	11.3077	11.8734	11.5106	11.5959	11.3771	11.23	11.4258	11.0844	11.4657
rna-NM_172527.3	4.81112	4.89481	4.43143	5.19171	4.93822	4.34441	4.72283	5.40411	4.80388
rna-NM_001356311.1	5.69522	5.98687	5.77372	4.5613	5.6791	6.57988	6.02297	5.6941	6.48683
rna-NM_001082484.2	4.46738	5.00801	6.22089	6.64612	7.16873	6.69452	6.67628	7.42531	4.14706
rna-NM_001290995.1	9.43278	10.1577	10.5361	10.7646	10.7142	10.0962	10.7359	11.1234	10.3683
rna-XR_001781521.2	8.49536	9.00075	9.21499	9.01722	8.82086	10.0413	8.46691	9.16654	9.89895
rna-NM_144731.4	6.75212	6.42587	6.66773	6.53733	7.72744	7.31085	7.6435	7.57816	6.28193
rna-XM_036163964.1	7.94833	7.17121	6.97931	7.7607	4.84747	7.88169	6.9788	6.86029	7.03987
gene-Mrps36-ps1	6.64352	6.2451	6.45518	6.52313	6.90706	6.71638	6.93101	6.61324	6.71088
gene-Mrps36-ps2	5.71975	5.00801	5.24064	5.40111	5.52244	5.71676	5.4868	5.33006	4.92094
gene-Gm7285	8.72147	9.30188	8.79457	8.97907	8.57013	8.70751	8.60061	8.26799	8.62376
rna-XM_006498079.4	8.4988	6.88818	6.81118	7.63525	8.09326	7.89127	8.42631	8.29142	8.40947
rna-NM_001374709.1	9.41649	9.39292	9.78944	9.52244	9.45469	9.55237	9.24643	4.49144	3.17337
gene-Selenok-ps4	5.03566	4.95273	5.17321	5.03027	4.8937	4.47435	4.6711	4.63543	5.02764
gene-Selenok-ps6	4.85951	4.62958	4.94611	4.79322	4.6417	4.19417	4.36739	3.84936	5.02764
gene-Selenok-ps8	4.90601	5.06093	5.17321	5.22905	5.2116	4.78948	4.6711	4.7009	4.97545
rna-NM_001110152.2	7.32752	8.00329	7.69207	7.51214	7.65019	7.46017	7.45424	7.65252	7.49853
rna-NR_163738.1	7.52323	6.94161	6.92221	6.67206	3.17337	3.17337	3.17337	5.57289	5.52838
rna-XM_006504146.5	7.46091	6.60282	6.87281	7.03337	7.81715	7.54769	7.78416	7.98718	7.54884
rna-XR_003955567.2	6.90613	6.71472	6.69076	6.9192	7.13415	3.77082	7.3126	7.44219	7.93645
rna-XR_001784176.2	8.36177	8.46938	8.82589	8.91852	8.76003	8.80189	8.61873	8.75282	8.81027
rna-NM_133835.2	4.53271	4.16621	5.36579	4.07087	5.13938	5.17779	5.4868	5.6941	6.01791
gene-Gm10698	8.28804	8.4046	8.3571	7.88161	7.66235	7.88169	8.0744	7.46714	8.23127
rna-XM_036164501.1	5.26042	3.17337	5.75153	5.76566	6.66142	5.10927	6.29132	6.52031	6.22045
rna-NM_172763.3	6.71684	5.49584	3.17337	6.44988	7.08973	6.57988	6.79871	7.17557	7.29733
rna-XM_006501307.3	5.32735	3.17337	4.71783	5.40111	3.17337	3.17337	5.21359	5.03124	4.86385
gene-Rpl31-ps9	8.58881	8.82452	8.64162	8.82696	8.43511	8.55324	8.57917	8.05449	8.52687
rna-NM_008043.3	6.75212	7.43553	7.62231	6.87532	6.87596	7.77184	7.21241	6.50421	6.65039
rna-NR_003270.2	6.79785	7.88606	7.3402	6.22189	4.04487	6.10114	5.84563	6.25713	5.96859
rna-NM_001360790.1	6.081	5.20745	5.81703	6.14932	5.94687	6.50636	6.12973	5.83183	5.75155
gene-Rpl31-ps13	8.24356	8.56565	8.32822	8.4896	8.12872	8.31792	8.22405	7.87373	7.88522
rna-NR_073559.1	5.53791	5.76335	5.75153	5.36847	5.81951	5.57669	5.92727	5.63485	6.35993
rna-XM_011243420.2	8.97735	9.01631	9.3928	9.07625	9.3309	8.86154	9.06007	9.73652	9.34329
rna-NM_026473.2	10.6498	9.51188	9.60471	10.0275	6.59913	6.60356	5.59218	6.17776	5.96859
rna-NM_001164581.1	6.11791	5.53233	6.15565	5.74086	7.02511	6.64977	6.56762	6.53623	6.34083
gene-Gm28530	7.76008	8.17411	7.80654	8.04335	7.66235	7.67527	7.66113	7.2542	7.8253
rna-NM_001139503.1	7.27209	5.70126	6.45518	6.05295	6.97711	7.66413	7.59542	7.8861	7.14192
rna-XM_006503610.4	6.94725	6.32832	6.83202	6.3405	7.40443	7.28195	7.12179	7.7163	7.2269
rna-NM_025379.2	9.86894	9.97386	10.1495	9.98453	9.81822	9.73352	9.80209	9.30643	9.35274
rna-XM_017321295.2	10.4276	10.332	9.03464	10.6438	10.4599	8.97841	8.19615	9.90991	10.8024
gene-Gm9027	6.00411	5.63621	5.50709	5.15325	5.81951	5.84374	5.98548	6.11512	6.34083
rna-NM_001384267.1	6.22312	6.2235	5.9197	6.56532	6.06347	6.62685	6.72203	6.53623	6.82463
rna-XM_036159094.1	6.02373	6.87451	6.38606	6.63297	6.3027	6.40198	6.4635	6.42085	7.13093
rna-XM_006500266.5	7.67729	7.97167	3.17337	7.06298	8.22193	8.42728	3.17337	8.25375	3.17337
rna-NM_025877.4	8.5328	8.62778	9.02118	9.03717	8.88442	8.66908	8.87394	8.88185	9.03824
rna-XM_036152915.1	5.79079	5.53233	5.33561	5.63686	5.94687	6.22932	5.4019	5.6941	5.91745
rna-XM_011245529.3	10.1209	10.6419	10.3186	9.95601	8.48039	8.54113	8.47024	8.3236	8.67364
rna-XM_017317745.3	4.59426	5.70126	5.24064	6.41948	5.176	5.67166	5.31115	8.20028	4.14706
rna-XR_004942257.1	5.85833	6.06218	5.85902	5.46408	5.65422	5.47449	5.59218	4.98211	5.17224
rna-NM_008120.3	7.03563	7.25785	7.38305	5.88335	7.41884	7.0951	6.58011	6.70044	6.83824
rna-NM_010865.3	3.17337	3.17337	3.17337	3.17337	4.58382	5.30469	4.55982	6.65751	5.21698
gene-Gm7324	6.90613	7.21519	7.3109	7.21134	6.73273	6.62685	6.43622	6.42085	6.60328
rna-NM_025993.3	5.9842	3.17337	7.03422	7.06298	7.78971	7.06144	7.63163	7.12413	7.91745
rna-NM_001364973.1	8.41013	9.83509	9.46915	8.77742	8.32102	8.00154	8.56366	7.75055	8.8307
rna-NM_013859.2	7.35063	7.17121	7.5173	7.12979	7.53587	7.75094	7.32741	6.8976	7.27755
rna-NM_001033474.2	11.5144	11.8423	11.8301	11.2968	11.7775	11.5642	11.8887	11.6043	11.5712
rna-NM_053122.5	5.32735	5.20745	5.45236	5.60957	5.52244	4.78948	5.10797	4.41131	4.80388
rna-NM_010394.4	4.65251	5.29655	5.27308	10.1087	4.74919	6.88012	6.47694	6.67197	7.89172
rna-NM_153391.2	5.35957	3.17337	3.17337	3.17337	5.72753	5.95996	5.8665	6.42085	5.75155
rna-NM_021419.2	7.94833	8.39986	8.05607	7.66123	8.07974	8.0957	7.80015	7.90446	7.61328
rna-NM_146205.2	8.46046	8.38554	8.17847	7.89261	7.4402	7.66413	7.67276	7.38222	7.70484
rna-NM_178624.6	3.17337	5.4197	3.17337	6.11157	5.6791	6.37464	5.14416	6.17776	6.01791
rna-XM_011246418.4	5.61886	3.17337	4.55526	4.89371	5.75111	6.45513	5.5666	5.80537	5.3819
gene-Rps16-ps2	11.888	12.4081	12.1599	12.3264	11.7228	11.8366	11.7269	11.5121	11.426
rna-NM_198012.4	5.42173	3.17337	4.3634	4.17295	4.74919	5.42029	5.4868	6.02697	4.86385
rna-NM_001356350.1	3.17337	3.17337	4.94611	4.94095	5.31285	5.36376	4.95171	5.07849	5.02764
rna-XM_030253573.2	7.56332	5.66913	8.79984	5.30063	4.69672	8.08739	8.72015	9.14099	8.22098
rna-NM_023054.2	9.45066	9.58257	9.45587	9.4293	9.13362	9.06975	8.93307	8.87257	9.40136
rna-NM_008388.2	9.33217	9.74643	9.56814	9.44245	9.3021	9.3521	9.32578	9.01724	9.36446
gene-Gm4017	7.28815	8.18518	7.5364	7.88161	7.07156	7.17594	7.07862	6.78261	7.51549
rna-XM_011243832.4	8.03158	3.17337	8.99156	3.17337	8.83434	3.17337	8.34516	8.69428	8.32072
rna-NM_011714.2	3.17337	3.17337	3.17337	3.17337	8.18453	7.84271	7.06983	8.42452	7.72684
rna-NM_001039710.1	6.90613	7.83073	7.32562	8.66973	7.20248	6.89932	6.96937	7.11361	6.66576
rna-XM_006521058.5	7.48199	5.73266	6.91246	7.1666	6.58634	6.57988	6.67628	6.59817	6.34083
rna-NR_164198.1	6.13601	5.87964	6.15565	5.26533	5.88466	5.84374	5.8665	5.12402	5.3819
rna-NM_011945.3	8.77357	7.21519	8.12908	8.64394	9.2407	9.16357	9.38697	8.91239	9.35274
rna-NM_175448.4	5.5098	6.0864	5.87955	5.81396	6.59913	6.06716	6.12973	6.38608	6.01791
rna-XR_001783733.1	8.21871	8.82098	8.56942	7.77266	8.04769	6.3183	7.71274	7.63795	7.83884
rna-NM_026065.4	7.09166	7.95883	7.19537	7.3853	8.15044	8.0365	3.17337	7.74376	7.81164
rna-NM_025338.4	9.00908	9.40952	9.2558	8.58078	8.72284	8.84686	8.70327	8.30989	9.00865
rna-NM_001110197.1	7.00677	7.7805	7.83764	7.17566	7.79524	7.58362	7.59542	7.60837	7.21655
rna-NM_030558.2	5.32735	5.45832	5.39528	4.94095	4.69672	5.30469	5.66612	3.17337	4.60262
rna-NM_001252438.1	6.69281	6.32832	6.40016	6.56532	6.52059	7.40765	6.64098	6.25713	7.0747
rna-XR_385298.5	5.03566	4.62958	4.86001	8.64719	4.98115	7.98374	4.99267	7.67409	7.39229
rna-NM_001363021.1	7.189	7.09085	7.12129	6.89743	6.17104	3.17337	6.77722	7.02661	3.17337
rna-XM_006524697.2	6.23992	6.73001	6.23673	6.43476	5.62888	3.17337	4.81978	5.60423	4.25711
rna-NM_138312.1	3.17337	8.12324	5.02651	4.89371	3.17337	4.01246	8.8149	4.7009	8.67364
rna-XR_003955655.2	3.17337	6.2235	5.93935	3.17337	6.27093	3.17337	6.5423	6.90982	5.86435
rna-NR_030711.1	7.58944	9.20198	8.87413	7.42378	6.68559	6.88012	6.74437	7.10302	6.37878
rna-XM_036165512.1	4.70787	5.85148	5.99666	5.79002	6.43743	6.10114	6.43622	7.01535	6.13404
rna-NM_001357068.1	9.21984	8.62778	8.78664	9.48663	9.34226	9.0095	9.25611	5.7784	8.60014
rna-NM_001199270.1	5.88012	5.66913	4.98697	5.7156	5.31285	4.69402	5.03231	5.03124	5.89116
rna-NM_028730.6	6.32099	6.69926	6.28322	6.32415	4.6417	6.93697	6.65285	4.63543	6.63486
gene-Gm6063	8.60168	8.94978	8.62687	8.32891	8.39201	8.25996	8.20817	7.69535	8.14137
gene-Gm6061	10.5024	10.6558	10.3513	10.2659	9.83574	9.92737	9.85017	9.29025	9.96359
gene-Gm6065	6.35215	6.60282	6.45518	6.37262	6.0447	6.1667	6.05948	5.72278	6.06553
rna-XM_011249385.4	10.0441	8.38554	8.57251	9.31755	5.88466	5.76041	5.5666	5.25156	5.49325
rna-XR_003946831.2	3.17337	3.17337	3.17337	7.092	7.11655	7.02697	7.02504	8.40747	3.17337
rna-NM_172609.3	8.94742	8.93019	8.90623	8.36883	8.6906	9.08234	8.84857	8.58099	8.86083
rna-NM_172479.3	6.51222	4.70185	5.58519	6.81849	9.62093	9.73352	9.5037	8.53855	8.99362
gene-Gm15725	12.3555	12.7036	12.611	12.7717	12.1354	12.1755	12.0939	11.996	12.6263
rna-XM_006515630.4	4.32259	5.25277	5.53363	5.55325	9.34603	4.01246	8.83313	6.07175	4.97545
rna-XM_036162134.1	7.78289	8.10003	7.97915	7.90896	7.71582	7.76143	7.75711	7.37345	7.19562
rna-NM_026432.4	11.2145	11.4614	11.3476	11.5358	10.9334	11.1674	11.1135	10.8609	11.3294
rna-XM_006506084.4	5.83618	5.16047	6.12186	6.69754	6.66142	6.40198	6.9788	7.7163	7.62895
rna-XM_036163270.1	3.79911	5.25277	5.95872	3.95368	4.23305	6.57988	4.90933	5.85779	6.75461
rna-NM_024182.4	6.27291	3.17337	8.06046	8.39613	6.4657	7.07837	5.59218	5.57289	8.46719
rna-NM_175668.4	9.69381	9.66387	9.2558	9.75244	9.0916	8.80696	9.07983	8.32813	9.37145
rna-XM_036161416.1	4.90601	5.11168	5.02651	4.62395	4.79936	5.47449	5.73623	5.43962	5.42006
rna-NM_008207.3	6.64352	4.89481	6.57166	7.01328	6.53399	6.69452	6.52947	6.99256	6.96756
rna-NM_001327998.1	7.25585	7.54283	8.13326	8.02348	7.82258	7.79245	7.75711	8.13442	7.76987
rna-NM_001110242.1	8.26799	8.57409	7.82735	7.81954	8.1971	8.01036	8.43316	7.90446	8.31105
rna-NR_028264.1	5.48108	5.16047	5.06483	5.36847	5.72753	6.1343	6.58011	6.04954	6.01791
rna-NM_009753.4	6.61821	6.38766	5.77372	6.03285	6.22187	6.97366	6.09505	6.52031	7.2269
rna-XR_003950428.2	3.17337	4.76979	5.79555	5.97075	3.17337	6.67232	6.33638	3.17337	5.17224
rna-NR_168893.1	5.45174	5.53233	5.83819	6.55139	6.72109	5.95996	5.98548	8.24417	7.05158
gene-Rpl36a-ps2	10.8273	10.901	10.6462	10.7144	10.4677	10.5919	10.5046	10.1733	10.6594
gene-Rpl36a-ps1	10.2894	10.3928	10.1193	10.2563	9.88706	9.95729	9.92852	9.62484	10.0975
rna-NR_027852.1	6.88513	3.8822	6.31338	6.73491	6.61181	6.50636	6.81988	5.7784	5.94326
rna-NM_145456.3	9.52176	8.59082	9.13807	9.41603	9.84775	9.52497	9.69516	9.92944	9.81428
rna-NM_009174.3	6.79785	8.20706	7.45175	7.66765	6.67356	6.25961	6.9407	6.6429	6.50407
rna-NM_001166409.2	9.26097	10.4094	9.91728	8.88039	7.79524	8.02784	7.27489	7.22522	6.75461
rna-NM_172490.4	6.06217	6.26637	6.12186	5.94941	6.45163	6.50636	5.82444	6.76924	6.37878
rna-NM_144522.5	8.72735	8.43736	8.57558	8.28786	8.66971	8.68567	8.80702	8.71521	8.52687
rna-XR_377502.4	3.17337	5.20745	5.89977	5.99176	5.75111	5.76041	5.61728	5.75087	5.89116
rna-XM_006523641.5	7.10986	5.16047	5.30472	3.17337	3.17337	3.17337	6.81988	6.93395	3.17337
rna-NM_198306.3	7.03563	4.95273	7.3109	3.17337	4.38845	3.17337	8.01173	8.00431	7.24737
rna-XR_003951168.2	4.46738	5.06093	4.49518	4.49476	5.02264	4.58973	4.72283	6.93395	4.35533
rna-NM_009256.3	8.58881	6.81846	6.15565	5.92774	6.34906	7.719	6.02297	8.03795	3.86828
rna-NM_021887.2	4.15167	8.55289	4.49518	7.7607	7.93202	7.94746	8.02539	7.68122	8.23127
rna-NM_183160.3	11.9963	12.3016	12.1928	12.1388	8.9101	8.87125	8.54798	8.93338	9.78317
rna-XM_030254916.2	8.24356	8.9003	8.69631	7.06298	8.08426	7.79245	7.9462	7.65252	7.68998
rna-NM_001163425.1	10.0698	8.41873	8.49017	9.97939	10.0769	10.0284	9.82828	9.17915	9.39451
rna-XM_011240888.4	4.90601	7.23668	6.35744	5.8606	5.86329	5.57669	6.02297	7.31964	6.08874
rna-NM_001081166.2	5.22561	5.53233	4.98697	3.17337	5.02264	3.17337	5.61728	6.23771	5.52838
rna-NR_103516.1	3.17337	3.17337	6.23673	3.17337	8.30174	7.02697	7.87754	7.67409	3.17337
[truncated: 13,530 more rows]

## Sheet: All Transcripts-Postfiltering
Transcript ID	baseMean	log2FoldChange	lfcSE	stat	pvalue	padj
rna-XM_030249898.2	214.273	0.08325	0.462264	0.180092	0.85708	0.959715
rna-XM_006533549.4	34.5809	0.149208	0.313537	0.475887	0.634155	0.872869
rna-NM_177577.3	27.0666	-0.671754	0.449139	-1.49565	0.134745	0.384184
rna-NM_201354.2	281.725	0.146395	0.199261	0.734688	0.462529	0.766998
gene-Gm3379	1504.87	0.46024	0.137438	3.34871	0.000811886	0.00868837
gene-Gm3375	727.41	0.545786	0.170211	3.20652	0.00134353	0.0128795
rna-XM_036153497.1	137.518	0.473292	0.150241	3.15023	0.00163144	0.0151543
rna-XM_006527758.5	83.4294	-0.977451	0.724474	-1.34919	0.177277	0.45412
rna-XM_030253763.2	44.681	0.173624	1.37025	0.126709	0.899171	0.969651
rna-NM_053262.3	894.323	-0.170832	0.222115	-0.769115	0.441825	0.751322
rna-XM_036157108.1	97.3108	0.334053	0.258804	1.29076	0.196787	0.484856
rna-NM_001111314.1	372.268	-0.461379	0.263292	-1.75235	0.0797141	0.274789
rna-NR_033782.1	21.4464	-1.29392	0.742114	-1.74356	0.0812358	0.27807
rna-NM_025934.2	97.661	0.0374166	0.239973	0.15592	0.876096	0.964425
gene-Gm6474	38.6853	0.919933	0.254865	3.60949	0.0003068	0.00395705
gene-Gm6475	153.252	-1.06115	0.405264	-2.61842	0.00883392	0.0560224
gene-Gm6477	94.0244	-0.278455	0.527446	-0.527932	0.597547	0.853235
rna-NM_013812.2	503.729	-0.501189	0.11955	-4.1923	2.76136e-05	0.00051551
rna-XM_006512783.5	383.596	-0.514692	0.204193	-2.52061	0.0117151	0.0693951
rna-XM_036158895.1	67.5804	0.64566	1.57197	0.410734	0.681268	0.891996
rna-NM_013835.2	510.091	-0.859241	0.318243	-2.69995	0.00693495	0.0468559
rna-NM_019707.5	157.724	-0.147015	1.1294	-0.130171	0.896431	0.968897
rna-XM_006503461.4	34.4484	-0.908613	1.78648	-0.508604	0.61103	0.861484
rna-XR_004941797.1	182.296	0.559675	0.713683	0.784207	0.432919	0.744475
rna-NM_001252573.1	179.504	0.0533309	1.40582	0.0379359	0.969739	0.990561
rna-NM_025550.3	444.352	0.413684	0.176912	2.33836	0.0193685	0.101211
gene-Gm5920	101.679	0.310733	0.163731	1.89782	0.0577194	0.221577
rna-XM_036159678.1	43.9272	0.4863	0.366746	1.32599	0.184844	0.465521
rna-XM_006497146.5	182.301	-0.165258	0.193533	-0.853901	0.39316	0.708394
rna-XM_036166029.1	365.167	-0.225484	0.224012	-1.00657	0.314141	0.632862
rna-NM_001301671.1	1338.18	0.724928	1.41251	0.513218	0.607799	0.859894
rna-XM_006520377.3	39.4631	-0.934668	0.82204	-1.13701	0.255534	0.566594
rna-NM_021432.2	1329.65	0.351599	0.181222	1.94015	0.0523609	0.207581
rna-NM_001013365.2	66.4884	2.67854	0.513268	5.21859	1.80286e-07	5.93621e-06
rna-NM_175451.1	419.435	0.846872	0.211411	4.0058	6.18078e-05	0.00101349
rna-XM_011238772.3	24.4196	-0.46089	0.444825	-1.03611	0.300149	0.617733
rna-NM_027395.2	6145.78	-0.147155	0.234239	-0.628224	0.529857	0.813374
rna-NM_175526.3	55.7229	0.35345	0.462926	0.763512	0.445158	0.754038
rna-NM_030263.5	395.521	0.137841	1.14956	0.119907	0.904557	0.971003
rna-NM_172462.4	20.8231	-0.936479	0.948329	-0.987505	0.323395	0.643294
rna-NM_001293652.1	1770.61	0.391385	0.238496	1.64105	0.100786	0.320446
rna-NR_126043.2	610.336	0.0752108	0.177033	0.42484	0.670953	0.887987
rna-NM_175324.4	57.3797	-1.27215	0.476578	-2.66935	0.00759993	0.0500252
rna-NM_027194.3	291.09	0.127384	0.106311	1.19823	0.230829	0.532286
rna-XM_011242692.3	105.935	-0.162025	0.489316	-0.331126	0.740549	0.917773
rna-NM_008929.3	958.04	-0.0151541	0.185097	-0.0818712	0.934749	0.979521
rna-XM_030251342.1	36.957	0.265907	1.00194	0.265394	0.790706	0.93449
rna-XR_003950507.2	75.3595	-0.846433	0.698017	-1.21263	0.225273	0.524572
rna-XR_003956387.2	21.6184	0.0105923	0.831698	0.0127358	0.989839	0.997547
rna-XM_036163245.1	43.4549	-1.73986	0.623708	-2.78955	0.0052781	0.0382251
gene-CYTB	5635.23	0.619705	0.469488	1.31996	0.186848	0.468609
rna-NM_198250.1	466.351	0.192425	0.218547	0.880477	0.378601	0.695658
rna-NM_139272.2	258.418	-0.817635	0.384122	-2.12858	0.033289	0.150357
gene-Rpl36-ps12	353.133	0.570636	0.146652	3.89108	9.97971e-05	0.0015332
rna-NM_025790.2	427.529	-0.325001	0.287243	-1.13145	0.257866	0.569468
rna-NM_025701.4	209.139	-0.545954	0.19298	-2.82907	0.00466831	0.0347925
rna-NM_019919.4	18.7391	-0.622589	0.406418	-1.53189	0.125549	0.368138
rna-NM_001164805.1	106.224	0.0836971	0.405634	0.206336	0.836528	0.95264
rna-XM_017315469.3	138.287	-2.82767	1.49711	-1.88875	0.0589248	0.224848
rna-NM_027541.5	161.209	0.315328	0.826111	0.381702	0.702682	0.90196
rna-NM_001355166.1	80.6449	-0.14976	0.394529	-0.379591	0.704249	0.902704
rna-NM_011340.3	64.5111	-1.59178	0.3163	-5.03249	4.84162e-07	1.45544e-05
rna-XM_036157697.1	36.5514	-0.764382	2.33189	-0.327795	0.743066	0.918456
rna-XM_030255115.1	197.094	0.858379	0.204787	4.19157	2.77028e-05	0.000516545
rna-NM_001364505.1	137.099	-0.253009	0.187503	-1.34936	0.177221	0.454085
rna-XM_030248662.2	11.2112	-0.889751	1.13343	-0.785008	0.432449	0.744021
rna-NM_001358931.1	191.537	-0.0829357	0.768382	-0.107935	0.914047	0.974113
rna-XM_036164036.1	26.0927	-1.42139	1.77296	-0.801703	0.422725	0.737006
rna-XM_006526646.5	91.6233	-0.24755	0.227796	-1.08672	0.277162	0.591382
rna-XM_036158702.1	225.323	-0.213966	0.699409	-0.305925	0.759662	0.923337
rna-XM_011250170.3	16.0531	0.302467	1.40033	0.215997	0.82899	0.949576
rna-NM_016810.4	93.2021	0.43547	0.431337	1.00958	0.312696	0.631885
rna-NM_009304.2	1100.14	0.260359	1.13616	0.229156	0.818748	0.94506
rna-XR_004935687.1	31.1068	-0.681173	0.414273	-1.64426	0.100122	0.319001
rna-XM_030253609.1	90.3451	1.45546	1.46655	0.992435	0.320985	0.640168
rna-NM_145447.2	91.6779	-2.375	0.971588	-2.44445	0.0145072	0.0818094
rna-NM_009451.4	322.237	-0.262027	0.201276	-1.30183	0.192974	0.478781
gene-Gm14176	416.311	0.511884	0.200693	2.55058	0.0107545	0.064965
gene-Gm14173	825.337	-0.0200022	0.278463	-0.0718307	0.942737	0.982765
rna-XM_006533812.5	8.88249	-0.270966	1.56202	-0.173471	0.862281	0.96079
rna-NM_010554.4	81.898	1.01895	0.448369	2.27257	0.0230522	0.115652
rna-XM_006531787.5	294.038	-1.57093	0.797969	-1.96866	0.0489925	0.198788
rna-XR_001780794.3	163.575	1.0817	2.02161	0.535068	0.592603	0.85002
rna-XM_006507737.4	324.263	0.0808826	0.580403	0.139356	0.889169	0.967243
rna-XM_006504669.4	236.302	0.299301	0.222904	1.34273	0.179358	0.457183
rna-XR_877089.3	38.9837	1.14725	0.485536	2.36285	0.0181352	0.0965164
rna-NM_145151.3	99.3909	-0.668378	0.541351	-1.23465	0.216961	0.514794
rna-NM_177900.4	144.889	0.352647	0.216137	1.63159	0.102766	0.324446
gene-Gm18722	115.353	0.433608	0.394882	1.09807	0.272174	0.585733
rna-NM_134139.1	114.316	0.553588	0.249793	2.21619	0.0266787	0.128238
rna-NM_027244.1	803.39	0.45862	0.117606	3.89963	9.634e-05	0.00149231
gene-Gm6900	105.78	0.744317	0.250744	2.96843	0.00299325	0.0245357
rna-NM_153792.2	267.23	-0.172788	0.180417	-0.957715	0.338207	0.658098
rna-XM_011245343.4	85.5789	0.468724	0.993454	0.471812	0.637061	0.873848
rna-XR_004934407.1	222.007	-0.250763	1.31284	-0.191009	0.848519	0.957246
rna-NM_010730.2	39.6703	0.729494	0.443627	1.64439	0.100096	0.318984
rna-XM_036153274.1	561.096	0.363538	0.161128	2.2562	0.0240582	0.119364
rna-NM_001368622.1	36.1684	0.656176	0.983463	0.66721	0.504638	0.797439
rna-NM_009673.2	1376.17	1.23312	0.301178	4.09433	4.23387e-05	0.000728922
rna-NM_009344.3	517.746	2.50763	0.31542	7.95012	1.86332e-15	2.12349e-13
rna-XM_006521721.4	747.532	-0.0544644	0.13875	-0.392537	0.694661	0.898369
rna-XM_006501504.5	30.4335	-1.99121	1.26812	-1.5702	0.116368	0.350833
gene-Gm3226	1008.56	0.028577	0.125492	0.227721	0.819863	0.945844
rna-NM_178918.3	141.044	0.354537	0.230024	1.5413	0.123243	0.363884
rna-XM_011249115.1	255.813	-0.412931	0.62497	-0.660721	0.508791	0.800404
rna-NM_001358568.1	159.327	-0.0270426	0.214498	-0.126074	0.899673	0.969988
rna-NM_008980.2	652.401	-0.733701	0.247845	-2.96032	0.00307321	0.0250566
rna-NM_153421.2	131.599	-1.15332	2.55911	-0.450673	0.652225	0.881055
rna-XR_386687.4	15.3001	-0.793544	1.01247	-0.783771	0.433174	0.744514
rna-XM_006513522.5	213.033	-0.550386	2.67945	-0.20541	0.837252	0.953016
rna-XR_003955596.2	47.7926	-0.363918	0.336362	-1.08193	0.279286	0.593759
gene-Gm18588	33.242	-1.07738	0.468762	-2.29835	0.0215417	0.110132
rna-XM_036158681.1	84.5177	-0.524599	0.319426	-1.64232	0.100524	0.319814
rna-NR_153807.1	277.064	-0.251256	0.436312	-0.575864	0.564707	0.833868
rna-XM_036160568.1	70.701	-0.561284	0.467124	-1.20158	0.229528	0.530516
rna-NM_023211.5	755.315	0.542117	0.392273	1.38199	0.166975	0.438877
rna-NM_008151.3	35.2974	-0.444782	0.258609	-1.7199	0.0854505	0.28711
rna-NM_178760.4	44.1279	-1.4425	1.8674	-0.772464	0.43984	0.750671
rna-NM_028351.3	25.0924	-0.677083	0.39653	-1.70752	0.0877254	0.291973
rna-NM_201358.2	193.023	-0.0809307	0.290639	-0.278458	0.780661	0.930244
gene-Gm7266	25.6204	0.774683	0.250527	3.09222	0.00198669	0.017765
rna-XM_030254804.2	248.753	-0.406656	0.348807	-1.16585	0.243676	0.550388
rna-NM_026468.2	456.579	0.109631	0.157894	0.694335	0.487472	0.785584
rna-XM_011239411.2	320.868	-0.0892058	0.130675	-0.682654	0.494825	0.790261
rna-XM_006520352.5	189.417	0.333889	0.70179	0.475767	0.63424	0.872869
rna-NM_010050.4	268.138	-0.351196	0.396589	-0.885542	0.375864	0.693421
rna-XM_036157957.1	43.3607	-0.928311	1.84171	-0.504048	0.614228	0.862985
rna-XM_006520943.5	30.2716	-0.0435729	0.939638	-0.046372	0.963014	0.988518
rna-NM_007903.5	208.164	-4.30385	0.455433	-9.45002	3.38754e-21	6.6322e-19
rna-NR_169007.1	24.0703	0.600613	1.18227	0.508015	0.611443	0.861484
rna-XR_004939058.1	10.8484	-0.775983	1.61376	-0.480853	0.630621	0.872052
rna-NM_030210.2	60.3968	0.118031	0.316977	0.372364	0.709622	0.904877
rna-NM_022883.3	43.3102	4.04221	0.944589	4.27933	1.8746e-05	0.000370332
rna-XM_011243373.1	81.7987	-0.661571	0.149575	-4.42301	9.73332e-06	0.000213867
rna-NM_026181.1	103.06	-0.432302	0.302677	-1.42826	0.153217	0.41537
rna-NM_028722.3	76.3628	-0.366557	0.603568	-0.607317	0.543641	0.820512
rna-XM_036155004.1	58.2386	-0.358116	2.54529	-0.140697	0.888109	0.966877
rna-XR_004940133.1	31.1217	-1.26135	0.271127	-4.65226	3.28316e-06	8.13916e-05
rna-NM_134164.5	26.4516	-0.364264	0.446488	-0.815842	0.41459	0.727877
rna-NM_010423.2	270.617	-0.818724	0.333361	-2.45597	0.0140505	0.0799063
gene-Gm9247	11.2716	0.980236	0.434132	2.25792	0.0239505	0.11902
rna-XM_036159646.1	71.7857	-1.17083	0.809312	-1.44669	0.147983	0.40652
rna-NM_001177845.1	88.4798	0.315235	0.604493	0.521487	0.602027	0.856171
rna-NM_133940.3	242.107	0.17615	0.223726	0.787345	0.43108	0.743005
rna-NM_001358970.1	21.3674	0.124164	1.79603	0.0691325	0.944884	0.983078
rna-NM_001373959.1	330.643	0.412861	0.494646	0.834658	0.40391	0.718392
rna-NM_001081355.3	180.04	-0.635342	0.19915	-3.19028	0.00142137	0.013507
gene-Gm6292	88.5032	-0.570594	0.38041	-1.49994	0.133629	0.382287
rna-XR_001783172.2	82.3104	-1.88948	1.95969	-0.964173	0.334959	0.655343
rna-NM_016851.2	32.0184	-1.19127	0.684919	-1.73928	0.0819854	0.279937
rna-NM_144877.1	15.8354	-1.52333	1.623	-0.938586	0.347943	0.667675
rna-XM_036153502.1	127.652	-0.0968936	0.771236	-0.125634	0.900022	0.970227
rna-NM_173391.3	14.2828	0.153513	1.25704	0.122122	0.902802	0.970647
gene-Gm8116	71.9413	-0.551252	0.399077	-1.38132	0.167181	0.439177
rna-NM_026370.2	110.487	-0.564049	0.344273	-1.63838	0.101343	0.321415
rna-NM_025313.2	1131.09	0.205399	0.209192	0.981867	0.326165	0.645944
rna-NM_001374000.1	25.088	-0.96135	0.870896	-1.10386	0.269652	0.583597
rna-XR_870463.3	14.8153	-1.66588	1.61338	-1.03254	0.30182	0.619645
rna-XM_006525081.4	165.061	1.0255	0.334649	3.0644	0.00218108	0.0191642
rna-XM_006500406.4	27.0916	-0.52456	0.557403	-0.941079	0.346665	0.666811
rna-NM_018861.3	168.581	0.137267	0.225008	0.610054	0.541826	0.81959
rna-NM_001033496.3	48.4252	-0.643763	0.363145	-1.77274	0.0762712	0.267203
rna-XM_030255601.1	62.1711	-0.417135	0.483747	-0.862301	0.388522	0.704311
rna-NM_146032.3	411.429	0.13968	0.147511	0.946908	0.343686	0.664727
rna-XM_006497216.5	111.121	-0.312402	0.622073	-0.502196	0.61553	0.863666
rna-XM_006517569.3	323.7	0.0909014	0.231026	0.393469	0.693973	0.898119
rna-NM_198108.2	42.5346	-0.892487	1.8195	-0.490514	0.623771	0.868094
rna-NM_026821.5	66.9555	-0.157142	0.361111	-0.435163	0.663444	0.885895
rna-XM_006500062.2	66.5642	0.230365	0.548709	0.419831	0.674609	0.889645
rna-XM_006498011.4	270.928	-0.339396	0.369713	-0.917998	0.35862	0.67824
rna-XM_006497070.5	553.134	0.0982929	0.200275	0.490789	0.623575	0.867902
rna-NM_001355426.1	295.159	-0.630158	1.09324	-0.576413	0.564336	0.833868
rna-NM_146057.3	457.211	-0.563727	0.149806	-3.76305	0.000167853	0.00239559
rna-XM_036157514.1	13.0219	-0.0856523	1.39316	-0.0614806	0.950976	0.984567
rna-XM_006512916.5	14.2371	0.0586295	0.460407	0.127343	0.898669	0.969206
rna-NM_001174155.1	12.34	-3.72916	0.755767	-4.93427	8.04496e-07	2.34009e-05
rna-XM_006498091.4	54.3288	-0.176749	0.262641	-0.672966	0.500969	0.795186
rna-NR_169308.1	83.1612	-0.392797	0.245137	-1.60236	0.109077	0.336304
rna-NM_025931.3	85.6571	0.135898	0.188705	0.720161	0.471426	0.772026
rna-NM_001004149.1	13.6272	-1.53724	0.839135	-1.83193	0.0669622	0.245399
rna-XM_011243332.3	13.042	-0.182092	0.87821	-0.207345	0.83574	0.952574
rna-NM_008239.4	1970.63	-0.171592	0.345664	-0.496412	0.619603	0.865697
rna-NM_001042451.2	516.584	-0.405194	0.200894	-2.01695	0.0437005	0.183086
rna-NM_027430.3	493.791	-0.0462586	0.147435	-0.313756	0.753707	0.921717
rna-XM_011247115.3	46.1429	-0.70151	0.910335	-0.770606	0.44094	0.750764
rna-NM_025794.2	79.698	0.184025	0.251079	0.732937	0.463597	0.767185
rna-XM_006531409.3	17.2283	-0.957487	1.1983	-0.799037	0.424269	0.738299
rna-NM_013736.4	383.838	0.193555	0.184305	1.05019	0.293629	0.610466
rna-NM_025285.2	1166.76	-0.533946	0.0940955	-5.67451	1.39089e-08	5.93303e-07
rna-NM_001356342.1	51.0391	-0.313351	1.41626	-0.221252	0.824896	0.947427
gene-Gm11557	10.6996	1.08664	0.665912	1.6318	0.102721	0.324369
rna-NM_001025608.2	846.311	-0.00909859	0.119442	-0.076176	0.939279	0.981305
rna-XM_017319453.3	39.3202	-0.9284	2.35127	-0.39485	0.692953	0.897624
rna-XM_006497431.5	72.1833	0.197803	1.00284	0.197242	0.843638	0.955346
rna-XM_030250695.1	46.2199	-0.304846	1.42211	-0.214362	0.830265	0.95026
rna-NM_001146318.1	472.013	-0.334168	1.25146	-0.267023	0.789451	0.933968
rna-XM_036165786.1	407.169	-1.04383	0.193283	-5.40056	6.64326e-08	2.42122e-06
rna-NM_001099319.2	54.1138	-0.723385	0.529526	-1.3661	0.171908	0.447224
rna-NM_139064.2	105.641	0.853092	0.269841	3.16146	0.00156982	0.0146622
rna-XM_006537654.3	27.3738	-0.0198541	0.63988	-0.0310279	0.975247	0.992962
rna-XR_004939049.1	616.578	0.611647	0.429327	1.42466	0.154254	0.417145
rna-XM_011247155.3	69.5259	0.629144	1.57257	0.400073	0.689103	0.896362
rna-NM_177103.4	215.332	-0.175245	0.321365	-0.545316	0.585536	0.847156
rna-NM_053162.2	459.807	-0.453304	0.325081	-1.39443	0.163186	0.432868
rna-NM_019428.3	42.4191	-0.926332	0.903305	-1.02549	0.305131	0.623366
rna-XM_006527567.2	47.2642	-0.505215	0.286776	-1.76171	0.0781185	0.270878
rna-NM_053145.2	28.5784	-0.438043	0.409246	-1.07037	0.284455	0.599491
rna-XR_004941413.1	44.7194	-0.995452	0.854136	-1.16545	0.243837	0.550549
rna-NM_153545.2	41.5956	-1.55977	0.864854	-1.80351	0.0713088	0.256346
rna-XM_030251093.1	33.984	4.38963	1.73068	2.53636	0.0112012	0.0670801
rna-XM_006497526.5	239.627	0.149132	0.26174	0.569772	0.568832	0.837881
rna-NM_022993.3	421.583	2.35126	1.18586	1.98275	0.0473955	0.194444
rna-NM_001347445.1	455.385	0.0933074	1.33998	0.0696335	0.944485	0.983078
rna-NM_001252056.1	114.694	0.569122	0.489172	1.16344	0.244651	0.551855
rna-NR_168036.1	22.1757	-7.88785	1.07735	-7.3215	2.45208e-13	2.11557e-11
rna-NM_001008425.2	78.8576	0.184921	0.974169	0.189824	0.849447	0.957469
rna-NM_001083882.1	228.665	-0.0881242	0.66288	-0.132941	0.89424	0.967957
rna-NM_009793.3	245.734	-0.282483	0.651358	-0.433683	0.664519	0.886466
rna-NM_011296.3	1148.01	0.540828	0.141213	3.82988	0.000128207	0.00190786
rna-XM_036160510.1	29.0545	-0.704444	1.37516	-0.512263	0.608467	0.859994
rna-NM_011284.3	174.318	0.278592	0.30202	0.922427	0.356306	0.675919
rna-NR_038082.1	14.4678	-1.3865	0.701264	-1.97715	0.0480252	0.196199
rna-NM_013625.4	95.4443	-0.0792927	0.591237	-0.134113	0.893313	0.967945
rna-XM_017316761.2	1059.29	-3.93707	1.10996	-3.54703	0.0003896	0.00479806
rna-XM_006526743.5	31.1781	-1.72536	1.74757	-0.987292	0.323499	0.643417
rna-NM_173423.4	24.6664	0.589911	0.458331	1.28709	0.198064	0.486746
rna-XM_011239469.4	56.9894	-0.941439	0.420802	-2.23725	0.0252701	0.123488
rna-NM_001291892.1	21.0945	3.21187	0.818706	3.92311	8.7414e-05	0.00137315
rna-XM_030252038.1	352.468	-0.905687	1.10402	-0.820351	0.412016	0.725739
rna-XM_006497253.5	85.14	0.372972	0.825668	0.451721	0.65147	0.880812
rna-XM_006538878.3	479.572	0.167306	0.176717	0.946746	0.343768	0.664727
rna-NR_001461.5	211.029	-1.43737	1.09018	-1.31847	0.187346	0.469009
gene-Gm2223	171.603	0.403842	0.311115	1.29805	0.194271	0.48129
gene-Gm2225	218.741	0.324752	0.187626	1.73085	0.0834787	0.28329
rna-XM_006514046.5	221.644	-0.678477	0.1221	-5.55673	2.74868e-08	1.10305e-06
rna-NM_172762.3	117.104	-0.499992	0.196312	-2.54693	0.0108677	0.0655451
rna-NM_009049.2	173.035	0.197429	0.195988	1.00735	0.313766	0.632646
rna-NR_015459.1	208.009	-0.431672	0.170445	-2.53262	0.0113213	0.0676397
rna-XM_017316787.3	152.287	0.0292306	2.58277	0.0113175	0.99097	0.997856
rna-NM_023215.6	249.903	1.23027	1.66697	0.738032	0.460495	0.765821
rna-XM_006522314.5	41.9545	-0.71808	0.285481	-2.51534	0.0118919	0.0701704
rna-XM_006511459.4	160.526	-0.721201	0.266891	-2.70223	0.00688759	0.0466639
rna-XR_004934316.1	37.5607	-2.46947	1.16069	-2.12758	0.033372	0.150465
gene-Gm9169	86.6047	0.554974	0.359877	1.54212	0.123044	0.363796
gene-Gm9168	14.251	-0.527341	0.804806	-0.65524	0.512313	0.801419
rna-NM_009713.4	212.255	-0.0880703	0.264029	-0.333563	0.738709	0.91712
rna-XM_036163258.1	54.9142	-0.438499	0.873751	-0.501857	0.615768	0.863666
rna-XM_036156904.1	41.6456	-0.986197	0.447193	-2.2053	0.0274327	0.130951
rna-XM_006515382.4	14.8079	-0.88145	0.999394	-0.881984	0.377785	0.694745
rna-NM_001363362.1	17.3484	0.859125	0.663604	1.29464	0.195446	0.482943
gene-Rpl7a-ps11	136.945	0.758939	0.171614	4.42237	9.76236e-06	0.000214197
rna-NM_001361534.1	3470.07	0.715842	0.197122	3.63147	0.000281811	0.00370995
rna-XM_006501710.4	69.6061	-0.361068	0.660277	-0.546843	0.584487	0.846679
rna-XR_003948323.2	93.4925	-0.374435	0.804287	-0.465549	0.641538	0.876044
rna-NM_009061.4	2291.4	-0.88468	0.146685	-6.03114	1.62803e-09	8.12473e-08
rna-NM_026472.4	302.895	0.586662	0.259095	2.26427	0.0235575	0.117564
rna-NM_019394.3	14.2184	-0.757966	2.16803	-0.34961	0.726631	0.911941
rna-NM_001081549.2	791.727	1.75112	0.497757	3.51803	0.000434769	0.00526515
rna-XM_006504612.2	196.284	-0.255964	0.129566	-1.97554	0.0482064	0.196624
rna-XM_011248057.4	319.136	-0.168363	0.326653	-0.51542	0.60626	0.859069
rna-NM_001290313.1	123.748	0.0831262	1.04149	0.0798146	0.936385	0.980056
rna-NM_033602.2	63.3522	-0.181977	1.41999	-0.128153	0.898028	0.969145
gene-Gm10167	44.6294	1.47657	0.654862	2.25478	0.0241475	0.119609
gene-Gm10163	57.6668	0.212939	0.260568	0.817211	0.413808	0.726937
rna-NR_166687.1	298.168	0.777381	0.168233	4.62086	3.8215e-06	9.29271e-05
rna-NR_154591.1	51.7027	-0.488098	0.886093	-0.550843	0.581742	0.845905
rna-NM_001159948.2	129.49	-0.0591513	0.381946	-0.154868	0.876925	0.964425
rna-NM_024478.2	369.47	0.550973	0.343612	1.60347	0.10883	0.336017
rna-NM_010326.3	12.8731	-0.518052	0.69133	-0.749355	0.453643	0.760271
rna-NM_025735.3	25.2141	0.491352	0.54163	0.907173	0.364315	0.683412
rna-NM_008503.5	788.307	0.896966	0.199918	4.48666	7.23469e-06	0.000164406
rna-XM_006500313.5	43.7796	-0.533554	0.741903	-0.719169	0.472037	0.772447
rna-NR_002870.2	27.0299	-1.6115	1.2841	-1.25496	0.209493	0.503885
rna-NM_007534.3	371.27	1.22489	0.208387	5.87797	4.15319e-09	1.9046e-07
rna-XM_030251004.2	51.8325	2.77037	1.85279	1.49525	0.13485	0.38434
rna-NM_008055.4	97.2502	0.237645	1.53296	0.155023	0.876803	0.964425
rna-XM_006534735.5	68.3882	-0.176825	0.971588	-0.181996	0.855586	0.959415
rna-NM_026309.2	340.746	0.289047	0.229974	1.25687	0.208801	0.502853
rna-NM_020005.4	141.571	-0.930794	0.659816	-1.41069	0.158337	0.424865
rna-XM_036164719.1	93.0044	-0.9492	0.194006	-4.89264	9.94943e-07	2.81888e-05
rna-XM_006500483.4	107.021	0.554974	1.09237	0.508044	0.611423	0.861484
rna-NM_172892.3	25.1599	-0.927656	0.908547	-1.02103	0.307239	0.625914
rna-NM_011715.3	1136.86	0.311731	0.165436	1.8843	0.0595238	0.226624
rna-XM_006513909.4	88.5886	-0.400475	0.778821	-0.514207	0.607107	0.859639
gene-Gm18157	64.6572	0.282172	0.252527	1.11739	0.263826	0.577454
rna-NM_008708.2	307.621	-0.0625704	0.204023	-0.306683	0.759085	0.923288
rna-XR_003950900.1	97.6944	-0.308115	0.298851	-1.031	0.302541	0.620288
rna-NM_001289550.1	78.1759	1.24903	1.20253	1.03866	0.298961	0.61645
rna-NM_178212.3	114.892	0.650009	0.402319	1.61566	0.106168	0.331108
rna-NM_001242424.1	23.4782	-0.335071	0.693225	-0.483351	0.628846	0.871283
rna-NM_026000.2	243.042	0.705692	0.289616	2.43665	0.0148241	0.0830476
rna-NM_029788.5	68.9528	-0.536905	0.355854	-1.50878	0.131355	0.37812
rna-NM_001079844.2	28.2575	-0.0353813	0.364158	-0.0971593	0.9226	0.9761
rna-NR_155072.1	353.055	0.0536574	0.289913	0.185081	0.853165	0.958203
rna-XM_036164125.1	215.879	0.0282014	0.308816	0.091321	0.927238	0.978171
rna-NM_134046.6	28.8041	-0.950241	0.81434	-1.16689	0.243257	0.549929
rna-NM_030013.3	55.9401	-0.862539	1.20324	-0.716848	0.473468	0.774042
rna-XM_036161957.1	45.0349	-0.0177665	0.386782	-0.0459343	0.963363	0.988745
rna-XR_384520.4	263.614	-0.118619	1.07616	-0.110224	0.912232	0.973304
rna-NM_175259.4	76.1129	-0.201306	0.255854	-0.786802	0.431398	0.743027
rna-NM_153055.3	211.007	0.165732	0.456366	0.363157	0.716487	0.907254
rna-XM_036162626.1	60.0359	-1.03506	1.22047	-0.848084	0.396391	0.710933
rna-XM_006521427.3	43.7681	0.517728	0.284418	1.82031	0.0687118	0.249579
rna-NM_001286713.1	185.524	-4.82762	1.75281	-2.75422	0.00588331	0.0414601
rna-XR_004938675.1	99.9206	-1.73463	1.14541	-1.51442	0.129919	0.376237
rna-NM_001358917.1	60.7739	-1.33989	0.410087	-3.26734	0.00108564	0.0108713
rna-XM_011239402.3	392.342	0.115073	0.739342	0.155642	0.876315	0.964425
rna-NM_001374087.1	59.5219	-1.52111	1.20464	-1.26271	0.206693	0.500381
rna-NM_001355505.1	68.8223	0.0578951	0.637228	0.0908547	0.927608	0.978171
rna-NM_007737.2	19.5607	-1.16481	0.762042	-1.52853	0.126381	0.369399
rna-NM_001347226.2	714.044	0.933917	1.34359	0.695093	0.486997	0.785307
rna-NM_009752.2	97.2482	-1.90513	1.04237	-1.82768	0.0675973	0.246957
rna-NM_133999.1	74.1482	-0.0849141	0.16237	-0.522967	0.600997	0.855582
rna-XM_036162095.1	103.992	0.00993455	0.366947	0.0270735	0.978401	0.993695
rna-NM_009679.3	562.318	0.0806253	1.19426	0.0675105	0.946175	0.983217
rna-NM_201244.1	26.5988	0.0486896	0.395668	0.123057	0.902062	0.970647
rna-NM_001276387.1	13.1854	-0.533587	1.60456	-0.332544	0.739479	0.917571
rna-XM_017317615.2	207.894	0.603513	0.748871	0.805898	0.420302	0.734458
rna-NM_170669.2	1720.53	0.450065	0.155509	2.89414	0.00380194	0.0296479
rna-XM_036156429.1	1610.81	2.08039	0.159464	13.0462	6.68347e-39	4.86016e-36
rna-NM_001355619.1	171.812	-0.0736453	0.1284	-0.57356	0.566266	0.83534
rna-NM_027060.1	53.7512	0.0953393	2.39808	0.0397565	0.968287	0.989945
rna-XR_004940733.1	107.572	0.0759749	1.32855	0.0571864	0.954397	0.985268
rna-NM_173382.2	193.123	0.513551	0.344054	1.49265	0.13553	0.385271
rna-XM_006539204.5	95.6054	-0.431444	0.374072	-1.15337	0.248757	0.557702
rna-NM_173001.3	181.661	-0.0735107	0.122588	-0.599659	0.548734	0.824207
rna-NM_001357748.1	396.448	1.00968	1.52894	0.660378	0.509011	0.800404
rna-XM_006504653.5	181.844	2.57232	1.02888	2.50011	0.0124154	0.0725977
rna-XR_001784219.2	46.4309	-0.962054	0.983664	-0.978031	0.328059	0.647455
rna-XM_006529447.5	80.6687	-1.14552	0.954453	-1.20019	0.230066	0.531336
rna-XM_030247321.2	57.4861	-0.829445	0.293854	-2.82265	0.00476292	0.0352738
rna-NM_001253822.1	310.987	3.83484	0.331485	11.5686	5.94109e-31	2.74928e-28
rna-NM_009190.2	591.734	-0.210719	0.141098	-1.49342	0.135328	0.38505
rna-NM_001001804.2	50.0462	-0.232539	0.293451	-0.79243	0.42811	0.740112
rna-XM_036159663.1	18.2429	0.644248	0.364103	1.76941	0.0768252	0.268651
gene-LOC115490257	12.4391	-1.10886	0.88356	-1.25499	0.209481	0.503885
rna-XR_003947308.2	8.47986	-1.01739	0.818943	-1.24231	0.214121	0.510912
rna-XM_011245706.4	399.698	-0.446836	0.872709	-0.512011	0.608643	0.860132
rna-NM_011865.4	1363.11	0.434656	0.143499	3.02899	0.00245377	0.0209591
rna-NM_025300.4	10.1184	-2.56641	1.46306	-1.75414	0.0794061	0.274036
rna-XM_030249980.2	1223.87	-0.978323	1.31839	-0.742059	0.458052	0.764638
rna-XM_036156047.1	34.7221	-0.177456	0.368902	-0.481038	0.630489	0.872041
rna-XR_004937531.1	316.731	-0.711949	0.393291	-1.81023	0.0702598	0.25329
rna-XM_036159708.1	160.08	-0.265783	0.299158	-0.888438	0.374305	0.692428
rna-NM_001361686.1	223.088	-1.54399	0.590892	-2.61299	0.00897545	0.0568024
rna-XM_030243710.2	220.397	2.7821	0.392212	7.09335	1.30899e-12	9.99481e-11
rna-XM_036154431.1	90.2801	0.28608	0.198819	1.4389	0.15018	0.410359
rna-NM_011075.2	20.0771	-1.40922	1.02895	-1.36957	0.170822	0.44546
rna-NM_010072.4	35.4988	-0.531903	1.45233	-0.366241	0.714185	0.90682
rna-NM_001190444.1	1348.94	-0.234455	0.181554	-1.29138	0.196573	0.484484
rna-NM_001359292.1	235.286	1.03045	0.136744	7.53563	4.85998e-14	4.55317e-12
rna-NM_001252508.1	232.221	0.151382	0.201098	0.752777	0.451584	0.758415
rna-XM_011243288.4	497.887	0.110386	0.187808	0.58776	0.556694	0.829128
rna-XR_383996.5	23.4406	-0.032514	1.28376	-0.0253272	0.979794	0.994146
rna-XM_006515325.2	266.036	0.0407104	0.180648	0.225358	0.821701	0.946319
gene-Gm15590	682.723	1.31192	0.141721	9.25701	2.10239e-20	3.73321e-18
gene-Gm15596	72.6043	0.0647345	0.288539	0.224353	0.822483	0.946506
rna-XM_030248923.2	76.5912	-0.380273	0.615224	-0.618104	0.536507	0.816427
rna-NM_026140.3	46.1394	-0.07504	0.227157	-0.330344	0.74114	0.917773
rna-NM_001364706.1	105.629	-0.0828358	0.800178	-0.103522	0.917549	0.975014
rna-XM_006527317.1	1406.01	-0.240907	0.111393	-2.16268	0.0305659	0.141575
rna-XM_017317470.3	42.8387	0.381964	0.297261	1.28494	0.198812	0.487797
rna-XM_006502148.3	59.7752	0.463928	0.262007	1.77067	0.0766158	0.26798
rna-XM_006541156.2	76.4542	1.27037	0.706205	1.79887	0.0720388	0.257395
gene-Gm10819	520.994	0.0729841	0.188708	0.386756	0.698937	0.899955
rna-XM_006495747.5	284.739	-0.503673	0.54496	-0.924239	0.355362	0.675219
rna-NM_001379260.1	267.415	-4.88394	0.699777	-6.97928	2.96688e-12	2.21011e-10
rna-XM_036156408.1	450.354	-0.831871	0.24903	-3.34045	0.000836438	0.00888446
rna-NR_015388.2	10.9895	-2.80768	0.997518	-2.81467	0.00488274	0.0360214
rna-NM_175419.4	38.711	0.942633	1.49696	0.629696	0.528893	0.812957
rna-XM_011244883.4	304.391	-0.364275	1.95402	-0.186423	0.852113	0.958078
rna-NM_183155.3	25.4682	1.31788	0.540936	2.43631	0.0148381	0.0830476
rna-XM_036152854.1	40.943	-0.32045	0.871799	-0.367573	0.713191	0.906387
rna-NM_026620.3	336.053	0.649001	0.609357	1.06506	0.28685	0.602874
rna-NR_110572.1	69.2416	-1.62042	1.21753	-1.3309	0.183222	0.462782
rna-XM_036153627.1	475.012	0.0755371	0.231484	0.326316	0.744185	0.918486
rna-NM_011938.5	149.778	0.377698	0.743618	0.507919	0.61151	0.861484
rna-XR_004940166.1	11.4727	-1.04911	1.62136	-0.647059	0.517594	0.80548
rna-XM_036158264.1	168.321	0.421752	0.227205	1.85626	0.0634164	0.236723
rna-XR_001780815.3	499.199	-0.34284	1.17209	-0.292504	0.769901	0.927075
rna-NM_029963.2	224.14	-0.184356	0.249765	-0.738115	0.460445	0.765821
rna-XR_001785575.2	37.7213	-0.00534917	1.26493	-0.00422883	0.996626	0.999443
rna-NM_207223.1	112.908	-2.58816	0.643098	-4.02453	5.70901e-05	0.000946605
rna-NM_001167918.1	109.345	0.8328	0.471457	1.76644	0.0773223	0.269248
rna-NM_025369.3	60.2194	-0.42921	0.242819	-1.76761	0.0771254	0.269144
gene-Gm3145	57.4085	-0.655709	0.27841	-2.35519	0.0185132	0.0977912
rna-NM_211358.2	167.264	0.183399	0.162671	1.12742	0.259564	0.572142
rna-NM_026936.3	323.048	-0.125629	0.232219	-0.540993	0.588512	0.848586
rna-XM_030254369.1	145.77	-0.667616	0.693659	-0.962457	0.33582	0.656237
rna-XM_006505409.4	131.223	0.00920621	0.172164	0.0534736	0.957355	0.986356
gene-Uqcrh-ps1	19.8937	0.158642	0.374423	0.423697	0.671787	0.888228
rna-NM_001024928.2	35.9385	-0.0560849	2.33566	-0.0240124	0.980843	0.994313
rna-XR_004941971.1	144.685	-2.87958	1.0684	-2.69522	0.0070342	0.047238
rna-NM_026276.3	111.317	-0.132072	0.309958	-0.426097	0.670037	0.887847
rna-NM_023311.3	554.41	-0.152179	0.196473	-0.774557	0.438601	0.749789
rna-XM_036154870.1	46.5156	-1.23	1.01543	-1.2113	0.225779	0.524871
rna-XM_006517308.5	57.4829	-0.49283	1.94791	-0.253005	0.800264	0.937602
rna-NM_178621.4	254.461	-0.327028	0.987659	-0.331114	0.740558	0.917773
rna-XM_884704.8	275.4	0.204728	0.212581	0.96306	0.335518	0.656074
rna-XM_017321454.2	42.2287	-1.46048	0.56492	-2.58529	0.00972972	0.0601792
rna-XM_006538052.3	10.2783	-0.0583778	0.476136	-0.122607	0.902418	0.970647
gene-Gm9712	96.9201	0.61058	0.212469	2.87374	0.00405643	0.0312069
rna-NM_001374727.1	425.228	-0.405621	0.307516	-1.31902	0.187162	0.468779
rna-XM_036154252.1	116.859	-0.743226	0.272106	-2.73138	0.00630696	0.043759
rna-NM_001080384.3	577.651	3.65924	2.75706	1.32723	0.184433	0.464996
rna-NM_010948.3	217.856	0.0117432	0.17871	0.0657113	0.947608	0.983869
rna-NM_001302440.1	177.463	-0.102364	1.22038	-0.0838786	0.933153	0.978923
rna-NM_001346609.1	1242.56	0.223008	1.00195	0.222574	0.823867	0.947271
rna-NM_023738.4	184.594	0.282525	0.601771	0.469489	0.63872	0.87471
rna-NM_011808.3	182.317	0.0592445	0.714651	0.0829	0.933931	0.979324
rna-NM_019639.4	14828.4	1.13964	0.295135	3.86141	0.000112735	0.00170792
rna-NM_001355416.1	168.445	-0.360736	0.146698	-2.45905	0.0139306	0.0794078
rna-NM_175116.4	341.715	-1.22255	0.279778	-4.36974	1.24397e-05	0.00026421
rna-NM_001286944.1	899.417	0.960926	0.285349	3.36754	0.000758414	0.008214
rna-NM_028336.3	18.4363	-1.93258	2.1994	-0.878687	0.379571	0.696551
rna-NM_001034097.2	30.5461	-0.30343	0.967989	-0.313464	0.753928	0.921796
rna-XM_006534030.5	76.4059	-2.02333	2.06861	-0.978113	0.328018	0.647455
rna-NM_008784.3	309.009	0.216622	0.126646	1.71044	0.0871837	0.290772
rna-NM_134058.3	250.104	0.777259	0.284055	2.73629	0.00621356	0.0432683
rna-NM_007553.3	221.839	2.73714	0.76312	3.58678	0.000334785	0.00425333
rna-NM_025577.3	360.612	-0.0984779	0.123956	-0.794459	0.426928	0.739689
rna-NM_007920.4	203.191	0.194663	2.64823	0.0735067	0.941403	0.982203
rna-XM_036153076.1	45.2979	1.01833	1.46661	0.694342	0.487468	0.785584
rna-NM_001378997.1	776.855	-0.0909449	0.138565	-0.656336	0.511608	0.800894
rna-XM_030249512.2	52.3194	1.37076	2.35133	0.582973	0.559912	0.831313
rna-NM_001310440.1	282.379	-0.322671	0.36776	-0.877396	0.380272	0.697239
rna-NM_153535.2	62.7948	0.100041	0.266505	0.375382	0.707376	0.904189
rna-XM_017322299.1	22.6834	-1.44329	1.30467	-1.10625	0.268618	0.582432
rna-XM_036164632.1	352.106	-0.627034	0.29375	-2.13459	0.0327949	0.148962
rna-NM_197980.1	98.2637	-0.0373403	0.206084	-0.18119	0.856219	0.959715
rna-NM_011664.4	94.2913	0.422381	0.338757	1.24685	0.212451	0.508596
rna-XM_036163037.1	114.378	0.786304	0.640673	1.22731	0.219706	0.518376
rna-NM_001025245.1	202.435	-0.213232	0.301248	-0.70783	0.479051	0.778833
rna-XM_006496551.5	31.2114	-0.0637	0.540113	-0.117938	0.906117	0.971562
rna-NM_027278.3	193.05	0.21701	0.238891	0.908404	0.363665	0.682838
rna-XM_006497691.5	124.835	-1.90795	2.48253	-0.76855	0.44216	0.751584
rna-NM_177572.4	24.4753	-0.439253	0.890683	-0.493165	0.621896	0.86675
rna-NM_001272078.1	493.223	-0.97124	0.770708	-1.26019	0.2076	0.501545
rna-NM_025985.4	554.185	0.25393	0.148393	1.7112	0.0870447	0.290552
rna-NM_175472.4	85.6706	0.108945	1.1946	0.0911978	0.927335	0.978171
rna-XM_006500123.4	94.1779	0.531781	0.408118	1.30301	0.192572	0.478174
rna-XM_017319427.2	190.694	-0.136716	1.17587	-0.116268	0.90744	0.971574
rna-XM_030249860.2	26.0093	-0.577889	0.52933	-1.09174	0.274949	0.588732
rna-NM_001159496.1	65.9688	-0.832681	0.981878	-0.848049	0.396411	0.710933
rna-XM_006532507.4	171.728	0.656018	0.400256	1.639	0.101214	0.321139
rna-XM_006526003.4	36.9989	-0.0490507	0.448103	-0.109463	0.912835	0.973525
rna-NM_001378525.1	612.806	0.324883	0.14605	2.22446	0.0261173	0.126243
rna-XM_030252617.1	73.6771	-0.66531	0.332395	-2.00156	0.0453316	0.187859
rna-NM_001346668.1	267.021	1.75491	1.19351	1.47037	0.141461	0.395099
rna-XR_001779951.3	187.238	-0.00651405	1.61809	-0.00402576	0.996788	0.999471
rna-XM_036157854.1	199.946	-0.145031	0.29619	-0.489657	0.624377	0.868483
rna-NM_001355196.1	76.2111	0.26501	1.12157	0.236284	0.813212	0.942577
rna-XM_030244129.1	87.8119	-0.144503	0.389272	-0.371214	0.710478	0.904972
rna-XM_030249382.2	67.1499	-1.19375	0.654517	-1.82387	0.0681714	0.248334
rna-NM_178605.4	200.164	0.433755	0.201397	2.15373	0.0312612	0.144009
rna-XM_006514004.4	27.6474	-0.18089	0.962259	-0.187985	0.850889	0.957793
rna-NM_001362398.1	16.1497	-1.16955	0.691509	-1.6913	0.0907792	0.299156
rna-NM_133791.5	412.087	-0.740113	0.508016	-1.45687	0.145152	0.401561
rna-NM_025448.4	348.679	0.58799	1.14616	0.51301	0.607944	0.85994
rna-XM_036158102.1	187.111	-0.406834	0.236772	-1.71825	0.085751	0.287858
rna-NM_009409.2	721.526	-0.61605	0.147071	-4.1888	2.8043e-05	0.000520346
rna-XM_011246104.2	70.8303	0.0957758	0.276913	0.34587	0.72944	0.912981
rna-NM_016861.4	289.681	3.90468	0.39052	9.99867	1.5446e-23	3.62886e-21
rna-NM_013549.2	114.892	0.650009	0.402319	1.61566	0.106168	0.331108
gene-LOC101056304	15.1005	0.431819	0.559571	0.771697	0.440294	0.750764
rna-NM_030559.3	67.7132	0.0776108	0.492343	0.157636	0.874744	0.964425
rna-XM_030246264.2	55.3758	0.625215	1.00687	0.620948	0.534634	0.816089
rna-XM_006534961.5	92.7375	0.0662993	0.413095	0.160494	0.872492	0.963888
rna-NM_009890.2	572.231	3.26492	0.491154	6.64745	2.98218e-11	1.93791e-09
rna-XR_001778845.3	32.8706	-1.59534	0.726081	-2.1972	0.0280063	0.132697
rna-XM_036160725.1	75.3523	-0.458493	0.305695	-1.49984	0.133656	0.382293
rna-NM_001161413.1	36.5719	0.441786	0.438069	1.00849	0.313221	0.632075
rna-XM_006504265.5	305.379	0.216578	0.317229	0.682717	0.494786	0.790261
rna-NM_001024474.2	698.783	-0.38295	0.206571	-1.85384	0.0637615	0.237315
rna-NM_015772.3	134.305	-1.22179	0.866005	-1.41084	0.158293	0.424865
rna-XM_017320455.2	220.221	-0.696947	0.588886	-1.1835	0.236611	0.540264
rna-NM_001362209.1	410.796	0.106386	0.174257	0.610512	0.541522	0.81959
rna-XM_006527617.4	113.265	-0.282028	0.523456	-0.538779	0.590039	0.849419
rna-NR_027969.1	9.41547	-0.156984	1.2056	-0.130213	0.896398	0.968897
rna-NM_178680.4	219.711	0.402278	0.295272	1.3624	0.173072	0.449029
rna-NM_027592.3	157.219	-0.258268	0.424471	-0.608448	0.542891	0.82019
rna-NM_001146201.2	123.994	0.292321	0.344299	0.849033	0.395863	0.710679
rna-NM_172467.3	13.2532	-0.80002	0.519786	-1.53913	0.123771	0.364882
rna-XR_373613.3	208.255	0.217933	0.124187	1.75487	0.0792811	0.273852
rna-NM_001301781.1	62.0715	-0.345213	0.365861	-0.943566	0.345392	0.665715
rna-NM_001316734.1	167.526	0.151604	0.365199	0.415126	0.67805	0.890863
rna-XM_030242830.2	231.643	-0.722183	1.14751	-0.629348	0.529121	0.813107
rna-XM_006539040.4	79.6491	1.55281	0.926969	1.67514	0.0939059	0.306096
rna-NM_028712.4	351.93	-0.339006	0.172497	-1.96529	0.0493811	0.199642
rna-XM_017319316.3	95.5942	-0.280678	0.715712	-0.392166	0.694936	0.898374
rna-NM_001357809.1	71.1178	0.63511	0.587586	1.08088	0.27975	0.594167
rna-NM_009745.2	248.881	-0.100682	0.279349	-0.360417	0.718535	0.908265
rna-XM_006517956.5	598.17	-0.936934	0.665139	-1.40863	0.158945	0.425833
gene-Gm10240	141.442	0.150524	0.205599	0.732127	0.464091	0.76767
rna-NM_029720.2	133.257	0.3129	0.296262	1.05616	0.290896	0.60766
rna-NM_001293766.2	15.5119	-0.749025	0.867001	-0.863926	0.387628	0.703491
rna-NM_007512.4	1131.66	-0.152026	0.114324	-1.32978	0.183592	0.463257
rna-XM_030242866.2	693.384	-0.104407	0.110952	-0.941007	0.346701	0.666811
rna-XM_030254506.2	66.3192	0.969531	1.92511	0.503624	0.614526	0.863173
rna-XM_006510046.5	53.5533	-1.44501	0.934327	-1.54658	0.121965	0.362006
rna-NM_008202.2	436.172	0.595288	0.190123	3.13108	0.00174167	0.0160224
rna-NM_001285427.1	243.313	-0.104973	0.321378	-0.326635	0.743944	0.918486
rna-NM_001039551.2	55.6169	0.32153	0.933588	0.344403	0.730544	0.913829
rna-NM_001127356.1	292.313	-0.112593	0.193196	-0.582791	0.560034	0.831313
rna-XM_006508123.4	562.611	-0.527572	0.18629	-2.83199	0.00462588	0.0345775
rna-NM_001290485.2	49.3476	-0.479706	0.306499	-1.56512	0.117556	0.353384
rna-NM_010316.3	969.574	-0.0663698	0.155299	-0.427367	0.669112	0.887605
rna-XM_006520695.1	26.0262	-0.270533	0.413117	-0.654858	0.512559	0.801566
rna-XM_006540378.5	41.0315	-0.0509855	0.81482	-0.0625727	0.950107	0.98434
rna-NM_126165.2	538.378	0.245166	0.182566	1.34289	0.179309	0.457183
rna-XM_006515433.5	146.568	-1.12681	0.591083	-1.90635	0.0566042	0.219141
rna-XM_011242104.4	67.3927	-0.561995	0.285223	-1.97037	0.0487959	0.198287
rna-XM_006509469.5	194.41	-1.91819	0.272241	-7.04593	1.84227e-12	1.39273e-10
rna-XR_004941816.1	137.476	-0.119198	0.566496	-0.210413	0.833345	0.951794
gene-Rnf170-ps	82.331	-0.383948	0.323047	-1.18852	0.234629	0.538038
gene-Gm10259	49.2113	0.381893	0.206407	1.85019	0.0642859	0.238411
gene-Gm10250	981.631	0.173834	0.179371	0.969128	0.332481	0.652387
gene-Gm10254	37.7141	0.422407	0.274144	1.54082	0.12336	0.364026
gene-Gm10257	243.411	-0.0761255	0.155608	-0.489214	0.62469	0.868662
rna-NM_001368627.1	505.978	-0.456257	0.137443	-3.31961	0.000901444	0.0094094
rna-XM_006540604.5	253.401	-0.117834	0.193875	-0.607784	0.543331	0.820311
rna-XM_006517207.3	75.1725	0.0607097	1.2759	0.0475817	0.96205	0.987993
rna-NM_178367.4	110.999	-0.318908	0.241195	-1.3222	0.186101	0.467589
rna-NM_019641.4	380.174	-0.493554	0.152198	-3.24284	0.00118345	0.0116447
rna-XM_006502785.5	186.155	-0.131473	0.30375	-0.432833	0.665136	0.886577
rna-NM_183289.3	19.0463	-0.434149	0.738828	-0.587619	0.556788	0.829128
rna-NM_026411.2	36.4718	0.639929	1.92548	0.332348	0.739626	0.917571
rna-NM_001081086.1	980.362	-0.122943	0.238149	-0.516242	0.605686	0.858592
rna-NR_104358.1	72.0004	-0.257805	1.05584	-0.24417	0.807099	0.939861
rna-NM_001024952.2	358.405	-0.122659	0.109215	-1.1231	0.261395	0.574024
rna-XM_006526769.3	370.18	-1.00582	1.09631	-0.917462	0.3589	0.678319
rna-NM_001360658.1	1832.18	0.429401	0.144819	2.96508	0.00302607	0.024725
rna-NM_029231.4	132.576	-0.37314	0.347383	-1.07414	0.282758	0.598084
rna-NM_001081982.3	498.983	-0.237957	0.307221	-0.774546	0.438608	0.749789
rna-XM_006497944.4	82.7605	0.765427	0.307563	2.48868	0.0128218	0.074393
rna-NM_010135.3	411.035	-0.23154	0.200516	-1.15472	0.248204	0.557236
rna-XM_006514270.2	212.56	0.189872	2.15692	0.0880295	0.929853	0.978611
rna-NM_026679.2	44.9156	0.398914	1.29723	0.307512	0.758454	0.923288
rna-NM_080557.2	317.841	0.774784	0.185163	4.18433	2.86011e-05	0.000529414
rna-XM_036164238.1	58.6324	-0.0355433	2.45886	-0.0144552	0.988467	0.996888
rna-XR_004933996.1	100.822	0.325681	0.34575	0.941957	0.346215	0.666378
rna-NM_013590.4	25.6215	-1.96298	1.62474	-1.20818	0.226977	0.526693
rna-XM_036152293.1	81.3905	2.35654	1.47378	1.59898	0.109825	0.337927
gene-Gm46649	76.3645	0.633461	0.237793	2.66392	0.00772363	0.0506334
rna-NM_007924.2	157.071	0.309009	0.262263	1.17824	0.2387	0.543293
rna-XM_011248362.3	33.4253	-0.954491	1.36324	-0.700165	0.483825	0.783176
rna-NM_022313.2	48.5365	-0.382313	0.271581	-1.40773	0.159211	0.426246
rna-NM_001378797.1	425.61	0.458355	0.104537	4.38464	1.16179e-05	0.000249181
rna-NM_175158.3	48.1789	-0.391982	0.289431	-1.35432	0.175634	0.452295
rna-XR_003953457.2	32.1876	0.711301	0.87672	0.81132	0.417182	0.73058
rna-XM_006523035.5	82.7147	-0.785212	1.35697	-0.578652	0.562824	0.83316
rna-XM_006534303.2	375.225	0.586236	0.224383	2.61266	0.00898419	0.0568341
rna-NM_001177812.1	288.856	0.573818	0.845798	0.678434	0.497497	0.792052
rna-NM_013867.3	130.622	1.75601	0.292786	5.99759	2.00268e-09	9.92952e-08
gene-Gm13904	28.7072	-0.0118623	0.23636	-0.0501872	0.959973	0.987388
rna-NM_009443.3	2099.21	0.646058	0.13023	4.9609	7.01655e-07	2.05268e-05
rna-NM_030215.3	219.328	0.0132008	0.12979	0.101708	0.918988	0.975607
rna-NM_029537.2	129.122	-1.84115	0.433567	-4.24652	2.17121e-05	0.000419703
rna-XM_011248768.3	57.0878	-1.50619	1.35553	-1.11114	0.266508	0.579456
rna-XM_006523559.5	9.12666	0.303935	1.60931	0.188861	0.850202	0.957793
rna-NM_001012667.2	270.107	-0.259424	0.118123	-2.19623	0.0280756	0.132878
rna-XM_006532178.5	372.591	-1.29521	0.214151	-6.04813	1.46533e-09	7.43425e-08
rna-NM_001360913.1	128.011	-1.30913	0.381985	-3.42717	0.000609902	0.0069537
rna-NM_026255.5	48.154	-0.413068	0.356208	-1.15963	0.246201	0.553758
rna-XM_036165653.1	49.9289	0.804244	0.23183	3.46912	0.000522168	0.00611505
rna-NM_008521.2	402.495	-1.67037	1.83782	-0.908885	0.363411	0.682781
rna-NM_024171.2	480.918	0.260368	0.175825	1.48084	0.13865	0.390724
rna-NM_030561.3	245.48	-0.48404	1.09381	-0.442527	0.658108	0.883358
rna-NM_001166218.1	13.299	-1.46198	0.67691	-2.15979	0.0307891	0.142263
rna-XR_001783177.2	145.512	0.119293	0.387573	0.307795	0.758239	0.923288
rna-NM_011240.3	214.87	0.0312974	0.34371	0.0910578	0.927447	0.978171
rna-mt-Rnr1	8974.09	-0.366648	0.479674	-0.764368	0.444648	0.753804
rna-NM_010270.2	134.239	-1.19403	0.747168	-1.59807	0.110027	0.338277
rna-XM_006506438.3	43.8617	0.250997	0.451005	0.556529	0.577849	0.844111
rna-XM_017319777.3	40.4901	-0.768381	1.54336	-0.497863	0.618581	0.865346
rna-NM_011186.1	542.341	0.557504	0.173767	3.20834	0.00133501	0.012822
rna-NM_008509.2	389.794	1.1583	0.482698	2.39963	0.0164115	0.0894112
gene-Gm5561	164.511	0.670492	0.147937	4.53229	5.83485e-06	0.000135829
gene-Gm5560	81.6642	0.594672	0.286727	2.074	0.0380789	0.166286
gene-Gm5566	484.947	0.877464	0.195109	4.4973	6.88227e-06	0.000158044
gene-Gm5564	407.407	0.0808504	0.163145	0.495574	0.620195	0.866277
rna-NM_025316.2	897.897	0.107901	0.118556	0.910129	0.362754	0.682304
rna-XM_006531450.5	136.575	-0.201435	1.15596	-0.174257	0.861663	0.96079
rna-XM_011239205.3	16.6627	0.0883597	0.504752	0.175056	0.861036	0.96079
rna-NM_026027.3	425.094	0.0377438	0.163865	0.230335	0.817832	0.94481
rna-NM_001358737.1	29.399	-1.24358	1.45445	-0.855018	0.392541	0.70765
rna-XM_036157984.1	227.531	0.910138	0.815343	1.11626	0.264309	0.577931
rna-NM_010218.2	75.3668	-0.965728	0.232133	-4.16024	3.17919e-05	0.000580735
rna-NM_019537.3	78.1852	0.0586938	0.265499	0.22107	0.825038	0.947432
gene-Gm18293	47.3637	0.503217	0.265656	1.89424	0.058193	0.222947
rna-NR_037961.1	28.8733	0.381643	0.946953	0.403022	0.686932	0.895315
rna-XM_006504261.5	40.3549	-0.0412424	0.975166	-0.0422927	0.966265	0.989653
rna-NM_007874.3	874.519	0.0703401	1.20041	0.0585969	0.953273	0.985141
rna-XM_006516762.5	96.9132	-0.538696	0.346086	-1.55654	0.11958	0.35743
rna-NR_152134.1	40.1636	0.196524	0.31173	0.630432	0.528412	0.81279
rna-XR_004936196.1	9.02976	0.328379	0.719895	0.456148	0.648284	0.878823
rna-XM_006522394.5	104.251	0.501709	0.564035	0.889499	0.373735	0.69181
rna-NM_008072.2	59.4754	-0.0686505	1.41367	-0.0485619	0.961268	0.987626
rna-NM_001360829.1	94.3258	-0.290419	1.29333	-0.224551	0.822329	0.946506
rna-XM_030247911.1	619.764	-0.814679	1.16867	-0.6971	0.48574	0.784619
rna-XM_036155219.1	54.4832	-0.246939	0.876463	-0.281745	0.778139	0.929378
rna-NM_025868.4	487.601	0.212233	0.134151	1.58205	0.113638	0.345692
rna-XM_036161740.1	121.254	0.11306	0.326458	0.346323	0.7291	0.912884
rna-NR_169011.1	14.139	1.6498	0.59237	2.78509	0.00535131	0.0385471
rna-XM_006510964.3	63.897	0.18742	1.94685	0.0962682	0.923308	0.976333
rna-NM_022891.3	2875.91	0.333302	0.152186	2.1901	0.028517	0.134201
rna-NM_001163624.1	11.9153	-0.197694	0.659284	-0.299862	0.764282	0.925352
rna-NM_130889.3	763.276	-0.859097	1.73552	-0.495008	0.620594	0.866438
rna-NM_133701.2	320.552	-0.42192	0.387947	-1.08757	0.276785	0.591241
rna-XM_030247137.1	89.9004	0.616018	0.563981	1.09227	0.274715	0.588645
rna-NM_019765.5	869.73	-0.868285	0.324024	-2.67969	0.007369	0.0488845
rna-XM_036155725.1	14.8976	-0.493209	1.00784	-0.489373	0.624578	0.868584
rna-NM_011014.3	198.684	-0.31512	0.249141	-1.26482	0.205934	0.499336
rna-XM_006528017.4	144.883	-0.222534	0.292116	-0.761801	0.446179	0.754551
gene-Gm16332	42.1705	-1.48928	0.309303	-4.81496	1.47232e-06	4.06578e-05
rna-XM_036157539.1	52.0592	-0.854845	0.676076	-1.26442	0.206079	0.499537
rna-NM_025314.3	301.033	-0.18178	0.135237	-1.34416	0.178898	0.456771
rna-NM_016843.4	923.731	-0.0629966	0.062122	-1.01408	0.310545	0.629414
rna-NM_001033268.3	1499.98	-0.0848692	0.221712	-0.38279	0.701875	0.901517
rna-XM_036153152.1	27.5686	-0.861002	0.783068	-1.09952	0.27154	0.585028
rna-XM_036164404.1	552.414	0.625136	0.339336	1.84223	0.0654412	0.241273
rna-XM_017314648.3	67.407	1.04575	1.56145	0.669727	0.503032	0.796066
rna-XR_875096.4	151.467	-2.13593	1.25016	-1.70852	0.08754	0.291692
rna-NM_001363750.1	20.0454	0.86019	0.817211	1.05259	0.292528	0.609343
rna-XM_030243329.2	35.5984	-0.743679	0.376269	-1.97645	0.0481034	0.196361
rna-NM_001329619.1	121.145	-0.478046	0.766428	-0.623733	0.532803	0.814785
rna-XM_006524775.4	18.2941	0.720507	0.473246	1.52248	0.12789	0.371852
rna-NM_001285991.1	140.131	-1.22271	0.395682	-3.09013	0.0020007	0.0178254
rna-XM_036162183.1	102.495	0.469182	0.398288	1.178	0.238797	0.543293
rna-XM_011244703.3	17.118	-1.70735	1.22281	-1.39625	0.162639	0.432116
rna-XM_006504569.3	93.5518	0.545283	0.170739	3.19366	0.00140481	0.0133663
rna-NR_073420.1	173.85	-0.303379	1.08286	-0.280164	0.779352	0.92985
rna-XR_004941905.1	82.7592	0.454733	2.01456	0.225723	0.821417	0.946319
rna-NM_001310526.1	85.4711	-2.22954	2.39557	-0.93069	0.352014	0.672539
rna-XM_030246273.1	197.282	0.197377	0.351741	0.561143	0.5747	0.84233
rna-NM_009234.6	296.908	-0.290195	0.349398	-0.830557	0.406224	0.720785
rna-NM_001285423.1	726.472	0.940546	0.226627	4.15019	3.322e-05	0.000599169
rna-NM_181315.4	23.904	1.21827	0.717353	1.69829	0.0894531	0.296321
rna-XM_036155960.1	207.779	-0.325041	0.323628	-1.00437	0.315202	0.63385
rna-NM_001135001.2	314.608	0.446138	0.806494	0.553182	0.580139	0.845273
rna-NR_145503.1	47.8148	-0.360343	0.344659	-1.04551	0.295789	0.612973
rna-XM_036156791.1	910.027	-0.245328	0.429599	-0.571064	0.567956	0.837107
rna-NM_001113565.1	421.082	-0.52884	1.86589	-0.283426	0.77685	0.928996
rna-XM_017313511.2	35.0228	-0.420105	0.926044	-0.453656	0.650077	0.879926
rna-NM_009096.3	806.045	0.598366	0.140122	4.27033	1.95185e-05	0.000384106
rna-XM_036159475.1	37.8276	-1.0982	1.34436	-0.816897	0.413987	0.727085
rna-XR_001781891.3	64.1943	-1.49383	1.09805	-1.36045	0.173688	0.449863
rna-XM_036155425.1	419.609	-0.461388	0.121885	-3.78544	0.000153435	0.00222724
rna-NM_001347645.1	163.071	0.0833985	0.280727	0.29708	0.766405	0.92575
gene-Gm12350	1827.93	0.333212	0.279188	1.1935	0.232673	0.535033
rna-XM_036159126.1	248.426	-1.36133	0.576426	-2.36167	0.018193	0.0966684
rna-NM_001305045.1	210.452	1.33332	1.58538	0.841009	0.400343	0.714878
rna-XM_011250219.4	78.467	-1.19836	0.372035	-3.22111	0.00127697	0.0123355
rna-NM_001310740.1	1420.85	-5.99547	2.5379	-2.36238	0.0181582	0.0965843
rna-NM_001290634.1	26.4945	-0.461176	0.760032	-0.606785	0.543994	0.820681
rna-NM_001168525.1	873.998	-0.816759	0.297675	-2.74379	0.00607339	0.0425054
rna-NM_009119.3	481.955	0.490471	0.135362	3.62339	0.000290767	0.00380162
rna-XM_006534231.4	18.555	-1.99178	1.67975	-1.18576	0.235718	0.539112
rna-XM_006517608.5	205.658	-0.960798	0.441659	-2.17543	0.0295978	0.138054
rna-NM_001357474.1	597.575	0.0536504	0.271953	0.197279	0.84361	0.955346
rna-XM_017320347.2	168.434	-1.61159	1.03148	-1.5624	0.118193	0.354608
rna-XM_036165858.1	10.9352	0.550666	0.833869	0.660376	0.509013	0.800404
rna-XM_006514793.3	155.721	-0.375833	0.411812	-0.912633	0.361435	0.680829
gene-Gm18949	48.9868	0.477958	1.36826	0.349317	0.726851	0.911941
rna-NM_001361017.1	32.8336	-0.741365	0.675839	-1.09695	0.272661	0.586287
rna-NM_025478.3	272.015	-0.621348	0.406862	-1.52717	0.126719	0.369862
rna-NM_001347386.1	112.396	0.559096	0.310674	1.79962	0.0719209	0.257278
rna-NM_023372.3	15.6183	0.40961	0.633956	0.646116	0.518204	0.806183
rna-XR_380392.4	41.8615	0.323355	1.0484	0.308427	0.757757	0.923226
rna-NM_001029878.2	184.39	-0.481269	0.436512	-1.10253	0.270231	0.58376
rna-NM_011446.1	307.891	0.911491	0.398646	2.28647	0.022227	0.112618
rna-NM_001311068.2	153.873	1.15826	0.5322	2.17637	0.0295279	0.137889
rna-XR_004938979.1	1055.06	-0.0231588	0.16669	-0.138933	0.889503	0.967255
rna-XM_030247596.1	71.4702	-0.35444	0.227267	-1.55957	0.11886	0.355834
gene-Gm8692	72.9994	0.156802	0.274212	0.571829	0.567438	0.836585
gene-Gm6311	54.5532	0.883232	0.235344	3.75293	0.000174776	0.00247589
rna-NM_007505.2	3288.14	0.432012	0.130079	3.32115	0.000896482	0.00937042
rna-XM_011246470.4	121.259	-1.51129	1.61091	-0.938164	0.34816	0.66785
rna-NM_001368697.1	82.7322	0.0453946	0.495144	0.0916796	0.926953	0.978171
rna-NM_001378844.1	152.529	0.0177432	0.788947	0.0224897	0.982057	0.994313
rna-NM_030238.2	1100.46	-0.0425016	0.220696	-0.19258	0.847288	0.956431
rna-XM_006527078.5	11.1347	1.32728	1.54187	0.860822	0.389336	0.704901
rna-NM_008599.4	486.205	5.25506	0.763213	6.88544	5.76088e-12	4.1694e-10
rna-XM_006517175.2	42.9636	1.2076	0.607904	1.9865	0.0469773	0.193106
rna-XM_011243456.4	70.16	0.206372	1.08294	0.190566	0.848866	0.957246
rna-NM_020507.3	327.141	0.44723	1.13679	0.393414	0.694014	0.898119
rna-NM_001358007.1	856.121	0.0351036	0.167153	0.210009	0.833661	0.951958
rna-NM_138591.2	108.37	-0.178409	0.246851	-0.722742	0.469839	0.770844
rna-NM_007598.5	17.5673	0.153117	0.599113	0.255572	0.798281	0.936996
rna-XM_036164746.1	156.392	0.629209	1.70053	0.370008	0.711376	0.905207
rna-NM_001379243.1	28.1264	1.08781	0.447495	2.43088	0.0150622	0.0839929
rna-XR_003950838.2	38.5347	-1.52196	0.635413	-2.39523	0.01661	0.090203
rna-XM_006499440.5	23.7701	0.314304	0.809619	0.388213	0.697859	0.899188
rna-NM_053157.2	167.495	-0.363809	0.229314	-1.58651	0.112624	0.343563
rna-XM_011247829.4	30.1291	-3.75625	0.978885	-3.83727	0.000124408	0.00186258
rna-NM_001037761.2	112.824	-0.338253	1.16645	-0.289984	0.771828	0.927616
rna-NM_001361971.1	59.3908	-0.793781	2.52465	-0.314413	0.753208	0.921647
rna-XM_006540098.5	28.4148	1.68779	0.827089	2.04064	0.0412865	0.175929
rna-XM_036157005.1	109.047	-0.748556	0.712355	-1.05082	0.293342	0.610259
rna-NM_027901.2	363.401	0.122091	0.220609	0.553427	0.579971	0.845273
rna-XM_030250202.2	315.67	-0.673669	0.290654	-2.31777	0.020462	0.105713
rna-XM_006512000.5	129.946	0.530487	0.575992	0.920998	0.357052	0.676913
rna-NM_015800.3	238.399	-0.536117	0.630141	-0.850789	0.394887	0.709999
rna-XM_030252071.2	136.33	0.493586	0.193412	2.55199	0.0107109	0.06483
rna-XM_030249698.1	92.9548	-0.233749	0.376709	-0.620503	0.534927	0.816123
gene-Gm2534	48.4427	0.618363	0.445161	1.38908	0.16481	0.435404
rna-NM_025959.3	132.209	0.32649	0.51684	0.631704	0.52758	0.812307
rna-XM_036163222.1	215.584	1.22823	0.228926	5.3652	8.08609e-08	2.88868e-06
rna-XM_030249057.1	1057.93	-0.528348	1.77958	-0.296895	0.766547	0.92575
rna-XM_006531827.5	67.1915	-0.20126	0.562233	-0.357965	0.720369	0.909089
rna-XM_036155650.1	938.321	-0.574416	0.11943	-4.80964	1.51203e-06	4.16039e-05
rna-NR_040642.1	51.4487	-0.139242	0.341714	-0.407482	0.683654	0.893307
rna-NM_178777.3	20.9409	-0.0390991	0.279143	-0.140068	0.888606	0.966999
rna-XR_004936019.1	28.4563	-0.159037	0.379591	-0.41897	0.675238	0.889781
rna-XM_017316565.1	20.5134	0.740297	0.731612	1.01187	0.3116	0.630275
rna-XM_017313681.2	58.3172	0.0907015	0.331842	0.273327	0.784602	0.932047
rna-NM_026565.3	40.2044	-0.207042	0.332706	-0.622298	0.533746	0.815293
rna-NM_001163780.1	38.4856	-1.59244	2.33039	-0.683338	0.494393	0.790149
rna-NM_001205095.1	47.1369	-1.16	0.446896	-2.59567	0.0094406	0.0587958
rna-NM_145511.2	134.821	-0.0156068	0.981445	-0.0159019	0.987313	0.996653
rna-NM_178407.3	471.181	-0.975634	0.208905	-4.67023	3.00866e-06	7.5568e-05
rna-NM_025864.4	137.966	-0.941374	0.32721	-2.87697	0.00401514	0.0309361
rna-NM_001370901.1	142.169	0.245592	0.34862	0.704469	0.481141	0.780735
rna-XM_036166059.1	127.632	-0.844896	1.0509	-0.803975	0.421412	0.735724
rna-NM_026664.4	196.79	0.0894552	0.228016	0.392319	0.694822	0.898369
rna-NM_025668.3	1237.67	-0.094733	0.160659	-0.589653	0.555423	0.828761
rna-XM_006515027.5	164.828	-0.171036	0.92213	-0.185479	0.852853	0.958111
rna-NM_008220.5	308.019	1.88205	0.717149	2.62435	0.0086815	0.0552167
rna-XM_036154877.1	95.1394	-0.17924	0.321802	-0.556988	0.577536	0.843787
rna-XM_030254839.2	57.8142	0.617973	0.361004	1.71182	0.0869301	0.29042
rna-XM_011242735.4	147.616	1.80734	0.745333	2.42488	0.0153134	0.0850984
rna-NR_002688.1	221.26	0.539291	0.259941	2.07467	0.0380172	0.16616
rna-NM_011018.3	2681.99	1.20486	0.277207	4.34642	1.38379e-05	0.00028518
rna-NM_001359916.1	44.183	-0.278025	0.381021	-0.729683	0.465584	0.768701
rna-XM_036157927.1	110.544	0.515895	0.672409	0.767233	0.442943	0.752328
rna-NM_020561.2	253.334	-1.11573	0.19277	-5.78791	7.12675e-09	3.20096e-07
rna-NR_002862.3	44.2201	0.0942797	0.29412	0.320549	0.748553	0.920198
rna-XR_004937409.1	80.4591	-0.0213603	0.189708	-0.112596	0.910351	0.972347
rna-NM_175149.4	640.103	-0.249116	0.229804	-1.08404	0.278348	0.592343
rna-XM_006510802.4	514.213	-0.432063	0.172657	-2.50243	0.0123342	0.0723334
rna-XM_006530806.4	73.6196	0.262371	1.51301	0.17341	0.862329	0.96079
rna-NM_023047.3	41.738	0.221473	0.443111	0.499813	0.617206	0.864286
gene-Gm4834	16.2497	-0.524953	0.888255	-0.590993	0.554525	0.828019
rna-XM_030253394.2	49.5926	-0.568539	0.616036	-0.9229	0.356059	0.675787
rna-NR_165793.2	780.625	0.788685	0.276966	2.84759	0.00440522	0.0332372
rna-XR_001779958.3	105.783	-1.04649	0.31334	-3.33978	0.000838459	0.00889792
rna-NM_008828.3	450.078	1.5287	0.148709	10.2798	8.68934e-25	2.28784e-22
gene-Gm4833	566.208	0.177565	0.183285	0.96879	0.33265	0.652524
rna-NM_011703.4	62.8126	-1.80736	0.799009	-2.262	0.0236974	0.118069
rna-NM_026139.4	361.219	0.0587447	0.221447	0.265276	0.790797	0.93449
rna-XM_036158178.1	243.475	-0.36669	0.181076	-2.02506	0.042861	0.18075
rna-XM_030243379.2	399.685	0.0865133	0.351982	0.245789	0.805845	0.939216
rna-NM_001252662.1	11.5413	-0.270472	0.405532	-0.666957	0.504799	0.797516
rna-XM_006533332.3	448.953	0.733847	1.08027	0.67932	0.496935	0.791809
rna-NM_001190401.2	439.081	-0.456004	0.282836	-1.61226	0.106906	0.332632
rna-XR_379106.3	133.182	-0.624289	0.353426	-1.76639	0.07733	0.269248
rna-XM_030249767.2	45.1357	-0.644637	0.733578	-0.878758	0.379532	0.696551
rna-XM_006497672.4	20.3722	-0.148996	0.278041	-0.535877	0.592043	0.84987
rna-XM_036160711.1	88.8018	-1.0229	0.619472	-1.65125	0.0986881	0.315748
rna-NM_023049.1	101.399	-2.12773	0.241282	-8.81844	1.16067e-18	1.77246e-16
rna-XR_004937239.1	47.1947	-1.86565	1.94984	-0.956822	0.338657	0.658639
rna-NM_001165991.1	123.52	-0.15963	0.331548	-0.481468	0.630184	0.871831
rna-NM_021556.3	197.845	0.530181	0.316979	1.67261	0.0944049	0.30739
rna-NM_175247.3	21.8375	-0.250314	0.904556	-0.276726	0.78199	0.93081
rna-NM_025895.4	1068.94	-0.469968	0.1682	-2.79411	0.00520435	0.0377915
rna-NM_023878.3	69.3357	-0.506062	0.735141	-0.688388	0.491208	0.788322
rna-NM_001289634.1	95.4507	-0.465589	0.90824	-0.512627	0.608212	0.859994
rna-XM_036156762.1	395.229	-0.300217	0.172544	-1.73995	0.081868	0.279739
rna-NM_011594.3	4276.74	-0.695192	0.223535	-3.10999	0.00187093	0.0169661
rna-XM_006498860.4	537.145	-6.40751	1.41944	-4.51412	6.35808e-06	0.000146447
rna-NM_001362918.1	94.5279	-0.624197	0.251344	-2.48343	0.0130122	0.0753258
rna-NM_027514.2	305.638	2.76992	0.250398	11.0621	1.91665e-28	6.80679e-26
rna-XM_030242508.2	143.002	-0.135852	0.252092	-0.538899	0.589957	0.849419
rna-NM_031195.2	110.805	3.18531	0.377315	8.44203	3.11885e-17	3.96899e-15
rna-NM_183308.3	636.49	0.201093	0.180319	1.11521	0.26476	0.57827
rna-XM_030245740.2	211.235	-0.685803	1.13356	-0.604998	0.545181	0.821375
rna-XM_006501289.4	230.018	-0.766808	0.527929	-1.45248	0.146367	0.404083
rna-XM_036152433.1	11.5269	-0.336073	0.523893	-0.641492	0.521203	0.807803
rna-XM_017317726.2	162.071	-0.118797	0.188148	-0.6314	0.527779	0.812307
rna-XR_003955646.2	322.967	-1.34977	0.293287	-4.60222	4.1802e-06	0.000100529
rna-NM_001310473.1	33.447	0.589115	0.764044	0.771049	0.440678	0.750764
rna-NM_027014.1	18.8159	0.197966	0.530606	0.373095	0.709078	0.904877
rna-NM_183286.2	11.1358	-1.16757	1.12006	-1.04242	0.297217	0.614182
rna-XM_036161589.1	16.575	0.079871	1.29186	0.0618262	0.950701	0.984524
rna-XM_011239800.2	141.529	-0.162668	0.858044	-0.189581	0.849638	0.957551
rna-XM_036153970.1	57.8735	-0.295055	0.403364	-0.731485	0.464483	0.767986
rna-NM_007806.3	1083.76	0.869561	0.138742	6.26744	3.67023e-10	2.06819e-08
rna-NM_008467.4	471.035	-0.143062	0.231441	-0.618136	0.536486	0.816427
rna-NM_172499.2	25.1166	-1.02404	0.8408	-1.21793	0.223249	0.521762
rna-NM_201226.1	371.53	0.621152	0.329695	1.88402	0.0595621	0.226657
rna-XM_036160618.1	144.068	0.134676	1.11977	0.120271	0.904268	0.970773
rna-XM_011246551.4	43.4667	2.76379	0.859152	3.21688	0.00129593	0.0124938
gene-ATP6	1598.91	0.172314	0.593514	0.290328	0.771566	0.927616
rna-XM_006508100.3	50.9988	-2.05677	0.666172	-3.08745	0.00201884	0.0179555
rna-NR_040311.1	61.1788	0.059062	0.387937	0.152246	0.878993	0.964502
gene-Rpl10-ps1	450.342	0.461746	0.155313	2.973	0.00294901	0.0242251
gene-Rpl10-ps3	2224.63	0.490979	0.119876	4.09573	4.20848e-05	0.000727494
gene-Rpl10-ps6	1266.86	0.493949	0.172461	2.86412	0.00418168	0.03198
rna-XM_036155063.1	144.52	-1.2082	1.66376	-0.726185	0.467725	0.769846
rna-NR_033430.1	36.6074	-0.301884	0.744221	-0.405638	0.685009	0.894291
rna-NM_011877.2	86.6269	0.0392667	0.278879	0.140802	0.888026	0.966877
rna-NM_011859.3	16.2383	-7.4269	1.12923	-6.57698	4.80103e-11	3.02961e-09
rna-NM_001285920.1	421.953	-0.540915	1.14026	-0.474377	0.635231	0.872869
rna-NM_007408.3	469.89	1.79607	1.35015	1.33027	0.18343	0.463079
rna-NM_007906.3	1945.31	-0.0323619	0.207106	-0.156258	0.87583	0.964425
rna-NR_149323.1	14.3194	0.489202	1.27425	0.383913	0.701043	0.901071
rna-NM_010252.4	53.4842	-0.557448	0.463691	-1.2022	0.229287	0.53004
rna-NM_001359097.1	1173.66	-0.516011	1.20449	-0.428405	0.668356	0.887396
rna-NM_178227.4	57.6241	-0.138372	0.814605	-0.169864	0.865117	0.961724
rna-NM_138595.2	23.2573	-0.989252	0.956223	-1.03454	0.300883	0.618411
rna-NM_009574.3	977.17	-0.638899	0.242856	-2.63077	0.00851908	0.0544558
rna-XM_036158829.1	86.4061	-0.434034	0.180462	-2.40513	0.0161666	0.0885826
rna-XM_006526241.3	32.1939	-0.393996	0.425501	-0.925959	0.354467	0.674552
rna-XM_017318594.3	10.116	-1.17724	1.5953	-0.737946	0.460548	0.765821
rna-NM_031997.4	116.523	1.24422	0.594063	2.09443	0.0362218	0.160192
rna-XM_011249151.4	142.015	-0.204529	0.384258	-0.53227	0.594539	0.851109
rna-NM_011803.2	4245.91	2.17797	0.415467	5.24223	1.5865e-07	5.33644e-06
rna-NM_010478.2	233.125	2.20977	0.449646	4.91446	8.90263e-07	2.5507e-05
rna-NM_138753.2	574.072	0.140525	0.157636	0.891452	0.372687	0.690776
rna-NM_144804.2	20.9455	-1.31561	1.70004	-0.773872	0.439006	0.749895
rna-NM_153562.4	268.785	-0.503677	0.288091	-1.74832	0.0804079	0.276426
rna-NM_028542.1	318.629	-0.133741	0.177857	-0.751958	0.452076	0.758643
rna-NR_015473.1	80.6046	-0.547378	0.377157	-1.45133	0.146689	0.404525
rna-XM_030252744.2	71.9297	0.732921	0.936118	0.782936	0.433665	0.745116
rna-XR_004934131.1	13.4208	-2.05914	1.51646	-1.35786	0.174508	0.450782
rna-XM_036165586.1	26.5265	-0.888809	0.958625	-0.927171	0.353838	0.674145
rna-XM_036154245.1	337.089	0.473572	1.0566	0.448203	0.654006	0.88165
gene-Gm5297	82.2733	0.195438	0.37319	0.523695	0.600491	0.855531
rna-NM_133229.2	71.0718	-0.108815	0.367622	-0.295997	0.767232	0.92575
rna-NM_007447.3	96.2266	-1.05127	1.01169	-1.03912	0.298748	0.616095
rna-XM_011248379.4	79.6497	-0.55624	0.296953	-1.87316	0.0610465	0.230354
rna-NM_025411.4	332.345	0.202766	0.266542	0.760728	0.44682	0.755081
rna-XM_036155857.1	12.5711	-1.2039	0.477006	-2.52386	0.0116074	0.068918
rna-NM_027497.3	157.489	-0.753893	0.261708	-2.88066	0.00396842	0.0306689
rna-NR_045611.1	57.829	-0.458391	2.47284	-0.185371	0.852938	0.958111
rna-XM_017317854.2	1226.18	1.32601	2.35809	0.562325	0.573895	0.841796
rna-XR_004941289.1	215.475	-0.307391	1.60875	-0.191074	0.848467	0.957246
rna-XM_030241947.1	91.0859	-0.190283	1.51821	-0.125334	0.900259	0.970325
rna-NM_175364.4	200.692	-0.737954	0.287588	-2.56601	0.0102877	0.0628414
rna-NM_001082960.1	487.501	-1.32369	0.392277	-3.37436	0.000739865	0.00805309
rna-NM_028469.3	18.3032	0.739753	0.665837	1.11101	0.266563	0.579456
rna-XM_006514326.3	86.4156	-0.632357	0.552853	-1.14381	0.252704	0.563266
rna-XM_011240592.4	189.69	-0.476688	1.21399	-0.392663	0.694568	0.898369
rna-XR_003955636.1	258.271	-0.272895	0.400391	-0.68157	0.495511	0.790517
rna-XM_006523676.5	2794.57	2.11273	0.68338	3.0916	0.00199084	0.017765
rna-NM_173028.4	42.0121	-0.679854	0.488343	-1.39216	0.163873	0.43416
rna-XM_030254373.2	31.6081	-0.593016	0.322658	-1.83791	0.0660759	0.242909
rna-XM_036166087.1	125.303	-0.381641	0.571489	-0.667801	0.504261	0.79716
rna-NM_178794.4	339.299	0.438207	0.28271	1.55002	0.121136	0.360597
rna-NM_001033430.4	276.815	-0.469216	0.311842	-1.50466	0.132412	0.379945
rna-XM_006538830.2	18.409	0.880674	0.396641	2.22033	0.0263963	0.127281
rna-XM_036159291.1	248.605	-0.205007	0.354192	-0.578803	0.562722	0.83309
rna-XM_017317466.3	69.3281	0.143266	0.430027	0.333155	0.739017	0.91715
rna-XM_006510825.4	578.8	-0.686235	0.196547	-3.49145	0.000480413	0.00571815
rna-XM_036162742.1	639.404	0.238261	0.171532	1.38902	0.164827	0.435404
rna-XM_030251460.1	15.5959	-0.869977	1.32231	-0.65792	0.510589	0.800695
rna-XM_006520258.5	37.9721	-0.594535	0.389523	-1.52631	0.126931	0.370342
rna-XM_006524723.4	47.1988	-0.0508365	0.372307	-0.136545	0.891391	0.967731
gene-Rpl31-ps14	143.412	0.281383	0.196327	1.43324	0.15179	0.412893
rna-NM_178668.3	90.6331	0.993944	0.298564	3.32909	0.000871316	0.00920821
gene-Rpl31-ps10	119.965	0.454061	0.175268	2.59066	0.00957921	0.0594168
rna-NM_011707.2	130.645	-1.35056	0.371711	-3.63335	0.000279765	0.00368937
rna-NM_001313695.1	160.25	0.780881	0.371687	2.10091	0.0356488	0.158254
rna-XM_011249508.3	73.4516	-0.47553	2.02534	-0.234791	0.814371	0.943271
rna-NM_023374.4	981.75	0.614592	0.218667	2.81063	0.00494445	0.036397
rna-NM_011249.2	62.5345	-0.840788	0.55066	-1.52687	0.126793	0.370008
rna-XR_867210.4	43.3337	-1.32397	0.99786	-1.32681	0.184572	0.465178
rna-XM_036161066.1	197.03	-0.662866	1.21203	-0.546907	0.584442	0.846679
rna-XM_030255546.2	339.015	-0.785568	1.19397	-0.657947	0.510572	0.800695
gene-Gm2962	276.029	0.275119	0.181986	1.51176	0.130594	0.377281
gene-Gm9008	69.5595	0.24095	0.202981	1.18706	0.235204	0.538702
rna-XM_030244835.2	117.199	-0.230087	0.478554	-0.480797	0.630661	0.872052
rna-NM_026558.5	36.3706	0.220825	0.928515	0.237827	0.812016	0.942102
rna-NM_133853.3	110.026	-0.350484	0.638706	-0.548741	0.583183	0.846303
rna-NM_010380.3	11214.9	1.77013	0.350121	5.05578	4.28641e-07	1.31706e-05
rna-NM_001349093.1	78.5632	-1.28776	0.22517	-5.71907	1.07108e-08	4.67325e-07
rna-NM_011787.2	95.0246	-0.193008	0.234862	-0.821792	0.411195	0.725411
rna-NM_016898.2	2106.51	-0.00123178	0.216106	-0.00569989	0.995452	0.999443
rna-XR_390317.5	72.3794	0.911691	1.96494	0.463979	0.642663	0.876181
rna-XM_036159225.1	270.472	1.02318	0.305658	3.34747	0.000815534	0.00871199
gene-Gm29257	201.553	0.365196	0.16094	2.26914	0.0232601	0.116461
gene-Smarce1-ps1	75.4164	0.489204	0.3079	1.58884	0.112097	0.342297
rna-XM_011242679.3	30.8177	-1.78137	0.452919	-3.9331	8.3858e-05	0.00132842
rna-XM_006510466.4	38.8993	-4.09889	1.38512	-2.95924	0.00308399	0.0251177
rna-XM_011248860.3	54.8474	-0.766272	2.09605	-0.365578	0.71468	0.907122
rna-NR_160678.1	62.5765	-0.106874	0.416577	-0.256553	0.797524	0.93656
rna-XR_001783686.3	33.7759	0.964662	2.31778	0.4162	0.677263	0.890826
rna-NM_029012.2	99.9414	-1.74778	1.05749	-1.65276	0.0983797	0.315092
rna-XM_036160104.1	105.116	1.05609	2.66146	0.396809	0.691508	0.897393
rna-XM_006504268.5	220.784	-0.485363	0.158282	-3.06644	0.00216621	0.0190774
rna-NM_001301269.1	292.915	0.575681	0.309722	1.8587	0.0630697	0.23589
rna-XM_006519714.1	91.9314	0.167158	0.974102	0.171602	0.86375	0.961184
rna-NM_145943.1	388.645	0.596513	0.226666	2.63169	0.00849617	0.0543548
rna-NR_033133.1	231.393	0.0139346	1.42727	0.00976317	0.99221	0.998619
rna-XM_006522653.4	135.255	-0.0962509	0.174929	-0.550229	0.582162	0.845905
rna-XM_006511456.4	16.5145	-0.0860113	1.77337	-0.0485015	0.961317	0.987626
gene-Gm9826	21.2739	0.705614	0.315052	2.23968	0.0251119	0.123004
rna-XM_006526230.2	168.906	0.45293	0.675595	0.670416	0.502593	0.796066
rna-NM_010284.3	52.0775	-0.152513	0.415384	-0.367161	0.713499	0.906476
rna-XM_030245800.2	195.653	0.0704484	0.584563	0.120515	0.904075	0.970691
rna-XM_006530330.5	61.9736	1.01654	0.702079	1.4479	0.147645	0.405958
rna-NM_011579.3	834.597	3.46872	0.498925	6.95239	3.59153e-12	2.63684e-10
rna-XR_004940339.1	243.976	-0.410351	0.341796	-1.20057	0.229917	0.531174
rna-NM_026734.2	30.2937	-0.258234	0.38805	-0.665466	0.505752	0.797935
rna-NM_173419.2	13.9557	-0.00395857	0.723188	-0.00547378	0.995633	0.999443
rna-NM_001081295.1	53.8402	0.0994013	0.301247	0.329966	0.741426	0.917773
rna-NM_001359945.1	91.6792	1.50671	0.317039	4.75245	2.0097e-06	5.30053e-05
rna-NM_001359486.1	170.604	1.34763	0.8202	1.64306	0.100371	0.319394
rna-NM_027307.4	902.331	-1.02169	0.251975	-4.05471	5.01957e-05	0.000846069
rna-NM_007802.4	16.9976	-1.90006	1.17118	-1.62235	0.104729	0.328468
rna-NM_008251.3	1049.14	0.125598	0.164554	0.763263	0.445307	0.754038
rna-NM_028411.4	51.724	-0.24216	0.202558	-1.19551	0.231888	0.534031
rna-NM_013551.2	67.3823	0.201762	0.275056	0.733531	0.463235	0.767045
rna-XM_006507440.5	255.049	-0.180631	0.468151	-0.385838	0.699617	0.900299
rna-NM_025755.3	23.566	-0.557546	0.461999	-1.20681	0.227505	0.527277
rna-XM_006508619.4	18.7742	-1.27869	0.84786	-1.50814	0.131519	0.378306
rna-XM_006517283.3	49.7067	-1.67947	0.513489	-3.27071	0.00107276	0.0107777
rna-XR_004934820.1	138.949	-0.188747	0.624921	-0.302034	0.762626	0.924624
rna-XM_036161155.1	134.354	-0.890421	0.263218	-3.38282	0.000717447	0.00787644
rna-XM_030244154.2	154.565	-0.47692	0.505992	-0.942544	0.345914	0.666165
rna-NM_001113558.2	15.115	-0.810151	1.69752	-0.477255	0.63318	0.872869
rna-XM_017318246.3	99.2127	-0.747575	0.408408	-1.83046	0.0671813	0.245966
rna-NR_030733.1	33.2492	1.35256	0.751649	1.79946	0.0719464	0.257305
rna-NM_010721.2	274.375	0.859959	0.213224	4.03312	5.504e-05	0.000917594
rna-XM_017312860.3	45.1321	0.432972	0.335058	1.29223	0.196278	0.483913
rna-NM_001357521.1	139.932	-0.054344	0.62825	-0.0865006	0.931068	0.978611
rna-NM_001360844.1	227.279	-0.528985	1.09028	-0.485185	0.627545	0.870334
gene-Gm12666	41.0774	0.0282041	0.433604	0.0650458	0.948138	0.983869
rna-NR_165074.1	108.086	0.0902026	0.631234	0.142899	0.88637	0.966391
rna-XM_006506056.4	147.394	-1.31771	0.284517	-4.63141	3.63182e-06	8.90233e-05
rna-NM_033570.2	59.3464	0.265211	0.348021	0.762054	0.446028	0.754448
rna-NM_001364946.1	49.7619	-0.0153646	0.344966	-0.0445397	0.964474	0.988882
rna-NM_138601.3	362.638	-0.568442	0.295159	-1.92588	0.054119	0.212729
rna-XM_030241992.2	18.2864	-1.35383	0.793571	-1.70599	0.0880093	0.292617
rna-XM_006517189.4	332.902	-0.624174	1.22478	-0.509623	0.610316	0.860982
rna-XM_006538495.4	349.067	-1.22397	0.30105	-4.06567	4.78948e-05	0.000810867
rna-NM_133727.2	54.3834	-0.885558	0.871748	-1.01584	0.309705	0.628505
rna-NR_168716.1	16.0482	-1.42438	1.39352	-1.02214	0.306712	0.625174
rna-NM_029394.4	127.666	0.533054	0.5356	0.995248	0.319616	0.638584
gene-Gm42162	552.645	0.13944	0.0697867	1.99809	0.0457068	0.188901
rna-XM_030246026.1	254.738	0.131087	0.207738	0.631022	0.528026	0.812524
rna-NM_010872.3	157.378	-0.682012	0.427549	-1.59517	0.110675	0.339757
rna-NM_028597.3	391.248	1.01226	0.349326	2.89775	0.00375848	0.0295211
rna-NM_001168304.1	107.015	-2.13122	0.880325	-2.42094	0.0154804	0.0859016
rna-NM_001081971.1	36.9241	-0.937792	0.35544	-2.6384	0.00832988	0.0535603
rna-NM_001290762.1	55.3962	-0.160344	1.90387	-0.0842198	0.932882	0.978902
rna-NM_024188.6	2380.13	-0.975237	0.177496	-5.49443	3.91971e-08	1.51978e-06
rna-XM_006518469.5	92.6324	-0.164619	0.509048	-0.323385	0.746404	0.918998
rna-XM_030255708.2	271.229	-0.0885282	0.262946	-0.336678	0.736359	0.916142
rna-NM_001290413.1	35.7956	-0.183177	1.32599	-0.138143	0.890127	0.967276
rna-NM_177344.3	97.4296	0.372735	0.213363	1.74695	0.0806463	0.276793
rna-NM_013831.4	31.3042	1.36301	0.991561	1.37461	0.169253	0.442959
rna-XM_036152322.1	19.9731	1.05998	0.839293	1.26295	0.206609	0.500323
rna-XM_011242391.4	107.39	0.260089	1.15288	0.225599	0.821513	0.946319
rna-XM_006505072.4	269.891	-0.142819	2.18986	-0.0652182	0.948	0.983869
rna-NM_198001.2	446.027	0.134036	0.105267	1.27329	0.202913	0.494413
rna-NM_172287.2	18.5865	0.359965	0.663444	0.542571	0.587425	0.848121
rna-XM_036155052.1	38.8352	-0.519902	0.611547	-0.850142	0.395246	0.71011
rna-NM_001362733.1	1103.74	0.0450869	0.142712	0.315929	0.752056	0.921278
rna-XM_006520908.5	18.2276	-0.643342	0.485523	-1.32505	0.185155	0.465949
rna-NM_001146268.1	31.7061	-2.13487	1.22806	-1.73841	0.082139	0.280288
rna-XM_017312616.3	70.7491	-0.469113	1.05951	-0.442765	0.657936	0.883284
rna-NM_010362.3	251.928	1.16271	0.429384	2.70785	0.00677206	0.0460036
rna-NM_008210.5	1054.93	-0.138119	0.152039	-0.908447	0.363642	0.682838
rna-XM_030245455.1	440.774	-0.0912887	0.17653	-0.517127	0.605067	0.858256
rna-NR_015537.2	29.6441	-0.58601	0.688067	-0.851676	0.394394	0.709649
rna-NR_045195.1	14.5307	-1.55781	0.665868	-2.33952	0.0193084	0.101014
rna-XM_036157896.1	67.4269	0.271662	0.975508	0.278483	0.780642	0.930244
rna-XM_006505966.2	10.5976	0.977193	0.831335	1.17545	0.239814	0.544485
rna-NM_025327.3	384.377	-0.0284753	0.71708	-0.0397101	0.968324	0.989945
rna-XM_006540592.5	86.0186	-0.827087	0.992566	-0.833281	0.404686	0.719323
rna-XM_017316660.2	61.5538	0.598523	0.303175	1.97418	0.0483609	0.197149
rna-XM_006526340.5	88.7029	0.0662094	0.324078	0.204301	0.838119	0.953259
rna-XM_036165682.1	709.615	0.584477	0.191846	3.04659	0.00231451	0.0200368
rna-XM_030251026.2	94.5312	-0.413526	0.347073	-1.19147	0.23347	0.535989
rna-NM_013904.1	15.1577	-1.3201	1.37834	-0.957747	0.33819	0.658098
gene-Gm7331	716.67	0.468436	0.136782	3.42469	0.000615509	0.00698843
rna-XM_006504402.5	198.724	0.814781	0.332887	2.44762	0.0143803	0.0813443
rna-XM_030250300.2	62.4803	-0.183184	1.11217	-0.164708	0.869174	0.963319
rna-XM_036155135.1	506.907	0.679598	1.21912	0.557449	0.57722	0.843757
rna-XM_006497491.4	17.1491	-2.55141	1.10409	-2.31088	0.0208397	0.107024
rna-XM_030254627.1	84.8507	-0.77	0.53438	-1.44092	0.149607	0.409401
rna-NR_137283.1	57.1366	0.427441	0.738309	0.578946	0.562626	0.833086
rna-XR_873743.3	653.827	-0.778056	0.128442	-6.05766	1.38119e-09	7.05421e-08
rna-XM_017320729.3	79.5554	2.6793	2.07661	1.29023	0.196971	0.485156
rna-NM_013560.2	3437.6	0.046661	0.27009	0.172761	0.862839	0.96079
rna-XR_003952750.1	24.0086	0.531034	1.29687	0.409474	0.682192	0.892561
rna-XM_036156160.1	17.1716	-0.330362	0.41555	-0.794999	0.426614	0.739537
rna-NM_138651.7	198.205	-0.264474	0.447307	-0.591257	0.554348	0.827917
rna-XM_011242696.3	12.1254	-0.0893174	1.34017	-0.0666465	0.946863	0.983777
rna-XM_011248292.3	104.722	-1.95964	1.95774	-1.00097	0.316841	0.635472
rna-XM_006538500.2	78.7984	-3.18405	0.861632	-3.69537	0.000219568	0.00300181
rna-NM_001024926.3	71.9642	-0.592292	0.363406	-1.62984	0.103136	0.32497
gene-Gm14026	21.4651	-0.0637865	0.330785	-0.192834	0.847089	0.956431
rna-NM_001101483.1	29.4453	0.775802	0.703383	1.10296	0.270045	0.58376
rna-NM_001005508.2	520.283	-0.326601	0.225516	-1.44824	0.147549	0.405858
rna-NM_023202.4	1029.98	-0.269131	0.204906	-1.31344	0.189036	0.472031
rna-NM_016894.3	150.054	-0.0955865	1.18437	-0.080707	0.935675	0.979975
rna-NM_145576.2	105.685	0.235146	1.38377	0.169932	0.865064	0.961724
rna-XM_006505104.3	126.498	-0.969257	0.576247	-1.68202	0.0925658	0.303146
rna-TrnP	184.709	-0.84086	0.485655	-1.73139	0.0833815	0.283086
rna-TrnQ	122.057	-1.45113	0.481571	-3.01333	0.002584	0.0218482
rna-XR_004938777.1	90.0431	0.122272	1.10759	0.110394	0.912097	0.973304
rna-TrnT	15.0991	-0.265584	0.611771	-0.434123	0.664199	0.886411
rna-TrnE	287.364	0.163951	0.395738	0.414292	0.67866	0.891223
rna-TrnH	31.3683	-0.504113	0.408254	-1.2348	0.216904	0.514768
rna-TrnI	72.0537	-0.479282	0.621183	-0.771564	0.440373	0.750764
rna-TrnN	50.7428	-0.4491	0.520742	-0.862423	0.388455	0.704311
rna-TrnM	117.731	-1.14992	0.405777	-2.83387	0.00459875	0.0344591
rna-NM_001033350.3	18.7464	-2.54345	1.03802	-2.45028	0.0142743	0.0808844
rna-NM_021524.2	1453.35	0.801381	0.244219	3.2814	0.00103292	0.0104601
rna-NM_001377000.1	117.497	0.679167	0.491946	1.38057	0.16741	0.439592
rna-NM_025843.3	535.253	0.343778	0.211304	1.62694	0.10375	0.326338
rna-XM_030250889.2	30.0811	-1.42141	1.36532	-1.04109	0.297835	0.615038
rna-NM_030203.2	333.879	-0.2915	0.28553	-1.02091	0.307297	0.625949
rna-NM_145443.2	20.5349	-0.0771289	0.770823	-0.100061	0.920296	0.975811
rna-NM_011602.5	2048.34	0.130874	0.218814	0.598108	0.549768	0.824544
rna-NM_145137.2	65.3656	-2.26378	0.233611	-9.69039	3.31275e-22	7.12522e-20
gene-Rpl19-ps6	104.938	0.390293	0.198842	1.96282	0.0496666	0.200227
rna-NM_013760.4	172.357	0.116999	0.178502	0.655452	0.512177	0.801378
rna-XM_036158164.1	46.02	-1.11293	0.842122	-1.32158	0.186308	0.467868
rna-NR_002445.2	544.021	0.042822	0.158785	0.269686	0.787402	0.932919
rna-XM_006510019.5	28.9939	-1.03837	0.890636	-1.16588	0.243664	0.550388
rna-NM_001001179.3	25.956	-0.597976	1.35276	-0.442042	0.658459	0.883491
rna-XM_036165660.1	122.679	0.379915	0.198779	1.91124	0.0559734	0.217361
rna-NM_011967.3	275.378	0.518447	0.181471	2.85691	0.00427789	0.032469
rna-NM_009963.4	203.728	0.112936	0.340816	0.33137	0.740365	0.917773
rna-XM_036152316.1	346.852	0.100008	0.433317	0.230797	0.817472	0.94481
rna-XM_036160747.1	107.747	0.673954	0.182092	3.70116	0.000214614	0.00295525
rna-NM_153796.4	43.3755	0.000240094	0.607783	0.000395032	0.999685	0.999906
rna-XM_006532887.4	1534.98	-0.146391	0.21579	-0.678396	0.49752	0.792052
rna-NM_012038.5	1187.87	0.039422	0.164415	0.239771	0.810508	0.941666
rna-XR_876783.3	15.7482	0.0864186	0.38868	0.222339	0.82405	0.947306
rna-NM_008376.3	97.6986	-0.127716	0.774729	-0.164852	0.86906	0.963302
rna-NM_001291001.2	21.3761	0.793211	0.713788	1.11127	0.266452	0.579456
rna-NM_009703.2	85.7335	-0.285695	1.50995	-0.189208	0.84993	0.957668
rna-NM_009031.3	802.215	0.482999	0.759135	0.636249	0.524614	0.810131
rna-XM_017312653.2	84.7815	-0.17159	1.13877	-0.150679	0.880229	0.964618
rna-NM_011960.3	153.132	0.607303	1.56273	0.388616	0.69756	0.899061
rna-NM_001359854.1	743.013	-0.196496	0.320523	-0.613048	0.539844	0.818402
gene-Gm4366	610.755	0.332267	0.130038	2.55515	0.0106143	0.0644394
rna-XM_011250977.4	152.308	0.0410247	1.60115	0.0256221	0.979559	0.994146
rna-XM_006503965.4	116.837	-0.0924904	0.500301	-0.184869	0.853332	0.958319
rna-XM_017320045.3	1746.7	1.14862	2.95545	0.388646	0.697538	0.899061
rna-XM_006529405.3	345.746	-1.18729	1.05585	-1.12449	0.260806	0.573638
rna-XM_011241935.4	63.1177	0.117998	0.195667	0.603058	0.54647	0.822343
rna-XM_036161736.1	125.643	-0.208072	0.928468	-0.224102	0.822678	0.946563
rna-NM_007481.3	1799.78	0.431751	0.101475	4.25476	2.09271e-05	0.000407625
rna-NM_153064.5	731.599	0.485564	1.12898	0.430092	0.667129	0.886922
rna-NM_001362647.2	141.828	-0.559364	0.703451	-0.795171	0.426514	0.739537
rna-NM_001357519.1	37.8705	-0.256129	0.907765	-0.282153	0.777826	0.929378
gene-Mrip-ps	247.985	-0.70442	0.533562	-1.32022	0.186761	0.468467
rna-XM_006501329.3	40.4473	-0.33069	0.614712	-0.537959	0.590605	0.849419
rna-NM_001357972.1	76.8552	0.311315	0.351319	0.886132	0.375546	0.69337
rna-XM_036158058.1	21.3862	0.0703877	0.589815	0.119339	0.905007	0.971266
rna-NM_178764.4	213.487	0.399987	1.372	0.291537	0.770641	0.927181
rna-NM_009295.2	63.2927	0.0257647	1.45735	0.0176792	0.985895	0.996141
gene-Gm9416	162.731	0.344957	0.240028	1.43715	0.150675	0.411178
rna-NM_010387.3	354.687	1.22669	0.258105	4.75267	2.00753e-06	5.30053e-05
rna-NM_029023.3	649.023	1.13951	0.260923	4.36722	1.25839e-05	0.000266603
rna-XM_006510435.5	44.5695	-1.01543	0.954484	-1.06386	0.287393	0.603684
rna-NM_007414.3	845.158	0.272212	0.0727353	3.7425	0.000182196	0.00257622
rna-XM_030250618.1	198.966	-0.728802	0.641239	-1.13655	0.255726	0.566777
rna-NM_007907.2	5552.17	0.360289	0.133637	2.69602	0.00701735	0.047181
gene-Gm7049	14.7871	0.107447	0.599448	0.179244	0.857746	0.959837
rna-NM_001081189.3	21.0053	-0.613909	0.7604	-0.80735	0.419465	0.733583
rna-NM_010518.2	236.302	-0.243365	0.212975	-1.14269	0.253167	0.563902
rna-NM_001039185.1	307.129	-0.231424	0.2468	-0.937699	0.348399	0.668224
rna-NM_022415.3	75.0639	0.886285	0.334387	2.65048	0.00803778	0.0521431
rna-NM_130449.2	15.2352	-1.08085	0.513904	-2.10321	0.0354477	0.157728
rna-XM_017321877.1	11.2451	1.63582	2.0179	0.810656	0.417563	0.730844
rna-XM_006506829.5	116.023	-1.7246	1.39019	-1.24055	0.214773	0.511908
rna-NM_001372258.1	174.932	-0.0268617	0.266597	-0.100758	0.919743	0.975781
rna-XR_004934902.1	44.7929	-1.66625	2.41674	-0.689462	0.490533	0.787984
rna-NM_022653.4	57.5137	0.408844	0.321652	1.27108	0.203702	0.495734
rna-NR_153761.1	41.5133	-0.275804	0.464917	-0.593233	0.553025	0.827235
rna-NM_001360912.1	61.5409	1.7594	1.05783	1.66321	0.0962702	0.311075
rna-XM_036162516.1	1148.7	0.318813	2.42648	0.131389	0.895468	0.968578
rna-NM_026559.3	536.678	0.423624	0.225462	1.87891	0.0602567	0.228106
rna-NM_001379128.1	459.871	0.503834	0.708465	0.711162	0.476984	0.777377
rna-NM_177214.5	482.307	0.0460186	0.111738	0.411845	0.680453	0.891927
rna-NM_030093.3	128.465	0.444897	0.256706	1.7331	0.0830777	0.282431
rna-XM_036156479.1	52.8197	-0.702054	0.366443	-1.91586	0.0553831	0.215765
rna-NM_026632.4	35.9381	-2.30531	0.666005	-3.4614	0.000537378	0.00627716
rna-NM_017470.2	191.278	-0.745962	1.04933	-0.710897	0.477148	0.777561
rna-XR_003946383.2	55.1491	-0.540708	0.314293	-1.7204	0.0853604	0.28711
rna-NM_146159.1	62.7883	0.113727	0.440908	0.257937	0.796455	0.935878
rna-NM_175105.3	285.861	0.0621457	0.193491	0.321181	0.748073	0.920015
gene-Gm12435	66.0876	1.66499	0.450245	3.69797	0.000217333	0.00297925
gene-Gm12430	19.1257	-0.644107	0.576897	-1.1165	0.264206	0.577876
gene-Gm46808	38.5637	0.766238	0.238673	3.21041	0.00132546	0.0127383
rna-XR_003956158.2	58.7977	-0.112334	0.856517	-0.131152	0.895655	0.968665
rna-XM_036152650.1	47.9188	-0.579507	1.86362	-0.310957	0.755834	0.922354
rna-XM_011246232.3	115.089	-0.947305	1.29182	-0.733307	0.463371	0.767045
gene-Gm10288	581.266	0.632627	0.150803	4.19506	2.72794e-05	0.000509895
gene-Gm10282	244.194	0.371356	0.215024	1.72704	0.0841596	0.284642
rna-XM_036159861.1	71.8681	-0.483364	1.12298	-0.43043	0.666883	0.886922
gene-Gm13743	13.6716	0.722366	0.493641	1.46334	0.143374	0.398228
rna-XM_030245012.1	196.158	0.177893	2.06932	0.0859667	0.931493	0.978611
rna-NM_010729.3	9.00378	1.01458	1.55534	0.652319	0.514195	0.802891
rna-NM_001284428.1	457.609	0.997426	0.138134	7.22071	5.17179e-13	4.2691e-11
rna-NM_145983.2	25.1285	-0.220864	0.521178	-0.423778	0.671728	0.888228
rna-XM_017312570.3	560.725	-0.151434	0.22752	-0.665583	0.505678	0.797935
rna-NM_023595.6	61.6006	0.849784	0.941579	0.90251	0.366786	0.684826
rna-XM_036164523.1	162.573	-0.0827844	1.24064	-0.0667271	0.946799	0.983777
rna-XM_006496322.2	64.203	0.199241	0.48504	0.410773	0.681239	0.891996
rna-NM_029868.3	53.9343	-0.466055	1.06649	-0.436998	0.662113	0.885232
rna-NM_008792.4	402.139	-0.290717	0.216497	-1.34282	0.179329	0.457183
rna-XM_036159071.1	18.5056	2.0066	1.5601	1.2862	0.198374	0.487114
rna-NM_030694.1	316.944	0.961186	0.792597	1.2127	0.225243	0.524572
rna-NM_027032.2	28.2455	1.28318	1.25276	1.02428	0.305702	0.623569
rna-XM_036152312.1	644.136	-0.0397622	0.404309	-0.0983461	0.921657	0.975827
rna-XR_866224.3	150.937	0.255116	0.181656	1.40439	0.160203	0.42792
rna-NM_029629.2	35.0495	-0.102495	0.80059	-0.128024	0.89813	0.969145
rna-NR_102383.1	13.2828	-1.47862	1.20422	-1.22787	0.219496	0.518376
rna-NM_178886.3	297.068	-1.41087	0.450579	-3.13124	0.00174069	0.0160224
rna-XM_006505617.5	131.241	-0.598713	0.496599	-1.20563	0.227962	0.527935
gene-LOC118567683	8.84515	-0.191249	1.32104	-0.144772	0.884891	0.966129
rna-XM_030255550.2	79.9493	0.166835	0.336878	0.495238	0.620432	0.86637
rna-NR_033619.1	100.794	0.342027	0.196583	1.73986	0.0818828	0.279739
rna-NM_026403.3	167.244	0.481524	0.266729	1.80529	0.0710292	0.255521
rna-NM_010352.2	25.6811	-0.4631	1.34788	-0.343577	0.731164	0.9141
rna-NM_001357488.1	24.494	0.856229	1.24523	0.687605	0.491701	0.788322
rna-NM_172151.4	282.883	-0.61064	0.187495	-3.25684	0.00112659	0.0112006
rna-NM_010902.4	937.802	-0.142122	0.433942	-0.327514	0.743279	0.918456
rna-XM_006501049.5	176.247	0.186201	1.34452	0.138489	0.889854	0.967255
rna-XM_036164785.1	618.075	0.228632	0.23148	0.987694	0.323303	0.643277
rna-NM_010434.2	672.645	-0.183887	0.154342	-1.19143	0.233485	0.535989
rna-XR_390323.5	190.987	-0.895552	0.456232	-1.96293	0.0496541	0.200227
rna-NM_008609.4	88.5135	-1.5595	0.425098	-3.66856	0.000243922	0.00329058
rna-NM_001122992.1	140.243	-0.569025	0.155049	-3.66996	0.000242588	0.00327547
rna-NM_001081227.2	130.985	0.545849	1.51393	0.360551	0.718435	0.908256
rna-NM_172843.4	70.7164	-0.752952	1.9502	-0.386089	0.699431	0.900211
rna-XR_001785155.1	145.147	0.374511	0.147307	2.54238	0.0110102	0.0661433
rna-XR_376833.5	160.007	0.786358	0.301842	2.60519	0.00918221	0.0577995
rna-NM_009105.4	499.861	-0.493018	0.148836	-3.31249	0.000924683	0.00960601
rna-NM_025476.6	42.7071	-0.953896	0.890811	-1.07082	0.284251	0.599297
rna-NM_001025431.1	129.048	-0.471173	1.07127	-0.439827	0.660063	0.88466
rna-NM_025923.3	84.1799	-1.60384	1.46913	-1.09169	0.274968	0.588732
gene-Gm11847	929.41	0.540205	0.101933	5.29959	1.16064e-07	4.02144e-06
rna-NM_013822.5	126.382	-0.885551	0.963135	-0.919446	0.357862	0.677617
rna-NM_053196.3	92.5094	-0.228507	0.333682	-0.684805	0.493467	0.789385
rna-NM_146241.3	22.9494	-1.21867	0.702732	-1.73419	0.0828839	0.282044
rna-XR_001780742.1	42.2746	-0.938125	0.891075	-1.0528	0.292432	0.609239
rna-NM_177473.3	290.019	-0.125416	0.215239	-0.582684	0.560106	0.831313
rna-XR_004941292.1	444.714	-0.873568	0.308257	-2.8339	0.00459841	0.0344591
rna-NM_025543.2	30.2992	0.010932	0.281603	0.0388207	0.969033	0.990182
rna-NM_013697.5	2483.85	0.217297	0.43314	0.501678	0.615894	0.863666
rna-NR_029447.1	13.4283	-0.175442	0.689375	-0.254494	0.799114	0.937199
rna-XR_871078.4	25.7365	0.617592	0.899823	0.686349	0.492493	0.788847
rna-NM_053141.3	21.1233	-0.707867	0.505507	-1.40031	0.16142	0.430493
rna-XM_011248073.3	249.95	-0.318892	1.27602	-0.249912	0.802656	0.938567
rna-NM_008711.2	22.5201	-0.750333	0.374022	-2.00612	0.0448434	0.186291
rna-NM_001293672.1	77.6023	-0.294113	0.505501	-0.581824	0.560685	0.831849
rna-NM_029891.3	95.8799	-0.274117	0.23117	-1.18578	0.23571	0.539112
rna-NM_008869.4	126.116	-0.859646	0.450758	-1.90711	0.0565058	0.218993
rna-NR_160895.1	13.6564	-0.886002	1.61372	-0.549043	0.582976	0.846303
rna-NM_008608.4	370.577	0.927837	0.38597	2.40391	0.0162207	0.0887553
rna-NR_155761.1	378.666	1.25047	1.38875	0.900427	0.367893	0.686166
rna-NM_011358.2	393.2	1.06945	0.854253	1.25191	0.210602	0.505518
rna-XM_036152559.1	76.7938	0.18188	0.734142	0.247745	0.804332	0.938966
rna-NM_001170966.1	80.4394	-0.437044	1.47752	-0.295795	0.767387	0.92575
rna-NM_001033439.3	121.311	-1.66006	1.4406	-1.15234	0.249181	0.558362
rna-NM_001356481.1	433.504	-0.963127	0.332657	-2.89526	0.00378847	0.0296373
rna-NM_001371035.1	192.254	0.751337	0.701272	1.07139	0.283993	0.599297
rna-XM_036159554.1	897.278	1.10514	0.292839	3.77388	0.000160729	0.00230902
rna-NM_009797.3	265.076	-0.365787	0.767666	-0.476493	0.633723	0.872869
rna-XM_006520168.5	19.2487	-1.78815	1.60903	-1.11132	0.266429	0.579456
rna-XR_004939231.1	42.9419	-1.14973	0.849238	-1.35383	0.17579	0.452544
rna-NM_145371.4	60.3343	0.659528	1.9007	0.346993	0.728596	0.912823
rna-NM_053214.2	270.064	-1.75959	0.492194	-3.57499	0.000350238	0.00439121
rna-NM_033568.3	323.898	-0.389573	0.189693	-2.0537	0.0400044	0.172252
rna-NM_001005859.3	143.479	1.61583	2.18151	0.740694	0.458879	0.765015
rna-NM_007798.3	3566.62	0.196845	0.903847	0.217785	0.827596	0.949386
rna-NM_175606.3	62.6664	1.45913	2.41841	0.603341	0.546282	0.822343
rna-NM_010495.3	1305.21	1.29056	1.85376	0.696187	0.486312	0.785039
rna-XR_001785590.2	66.2386	-0.132418	0.317582	-0.416956	0.67671	0.890658
rna-NM_001362459.1	142.241	3.66865	0.379157	9.6758	3.82084e-22	8.10389e-20
rna-XR_379295.5	9.25442	-0.083213	1.20748	-0.0689144	0.945058	0.983078
rna-NM_178736.5	44.3444	0.591366	1.14575	0.516141	0.605756	0.858592
rna-XM_006530292.5	60.064	0.166274	0.487442	0.341117	0.733016	0.914882
rna-XM_006534876.4	88.2869	-0.299164	0.730845	-0.40934	0.68229	0.89258
rna-NM_025292.7	186.989	-0.831029	0.439208	-1.89211	0.0584764	0.22364
rna-NM_013686.4	598.896	0.553973	0.124578	4.4468	8.71592e-06	0.000194877
rna-NM_172741.3	535.421	-0.315424	0.903596	-0.349077	0.727032	0.911941
rna-NM_001033306.1	127.38	0.705202	0.33195	2.12442	0.0336349	0.151471
rna-XM_006512127.5	36.046	3.0781	2.12158	1.45085	0.146822	0.404525
rna-NM_001310598.1	361.46	-0.669902	0.152986	-4.37886	1.19304e-05	0.000254809
rna-XM_006521430.4	258.067	-0.874683	1.02791	-0.850935	0.394805	0.709971
rna-XM_036156767.1	75.1016	1.44544	0.37704	3.83365	0.000126258	0.00188658
rna-XM_036164021.1	249.673	-0.413792	0.550105	-0.752206	0.451927	0.758587
rna-NM_009214.4	145.331	0.0340446	0.352293	0.0966373	0.923014	0.976333
rna-NR_151681.1	66.5124	0.382203	0.430939	0.886907	0.375129	0.693199
rna-NM_009622.2	2233.1	-0.300849	0.560598	-0.536657	0.591505	0.849673
rna-XM_006497160.5	105.829	0.303873	0.584207	0.520146	0.602962	0.856941
rna-NM_025901.3	221.935	-0.14855	0.223092	-0.665871	0.505494	0.797935
rna-XM_006517074.5	777.528	-0.917745	1.15731	-0.792998	0.427779	0.739997
rna-NM_020579.2	193.77	-0.0225134	0.326461	-0.0689621	0.94502	0.983078
rna-XM_017313344.3	42.8961	0.392365	0.923357	0.424933	0.670885	0.887987
rna-NM_172414.4	15.3585	0.23451	0.441996	0.53057	0.595717	0.851504
rna-XM_006501470.4	249.168	-0.853937	1.27499	-0.669758	0.503012	0.796066
rna-NM_010169.4	47.6252	0.704826	2.36492	0.298034	0.765677	0.925734
rna-XM_006515273.3	84.7494	0.500707	1.48524	0.337122	0.736025	0.916142
rna-XM_030243074.2	88.1899	-0.872397	0.498626	-1.7496	0.0801873	0.275859
rna-XM_006508915.3	290.256	2.2664	1.30682	1.73428	0.0828682	0.282044
rna-NM_173037.1	31.2166	-0.792297	0.781832	-1.01338	0.310876	0.629711
rna-NM_001290988.1	113.371	0.946295	0.797204	1.18702	0.235221	0.538702
rna-NM_001042438.2	182.834	-0.430411	0.634656	-0.678179	0.497658	0.792052
rna-XM_006515443.5	395.491	-0.216312	0.466837	-0.463356	0.643109	0.876283
rna-NM_008059.3	21.1808	-1.66051	1.21219	-1.36985	0.170735	0.445387
rna-XM_006505401.4	138.327	1.13679	0.992786	1.14505	0.252189	0.562463
gene-Gm6975	38.2046	0.684256	0.223191	3.06579	0.00217097	0.0190973
rna-NM_009139.3	496.807	-0.653619	0.420964	-1.55267	0.120502	0.359337
rna-NR_164193.1	986.992	0.677915	0.173629	3.90438	9.4467e-05	0.00147355
rna-NM_153781.1	319.373	-0.612678	0.157074	-3.90056	9.59703e-05	0.00148939
rna-NM_009067.5	885.301	-0.749312	0.317675	-2.35874	0.0183373	0.0971647
rna-XM_036154878.1	43.5574	0.279744	0.382605	0.731156	0.464684	0.768152
rna-XM_017321382.3	94.7406	-0.306916	0.404002	-0.759689	0.447441	0.755711
rna-NM_001083331.2	281.396	-0.137399	0.715189	-0.192116	0.847651	0.956622
rna-NM_010572.2	17.7889	-0.438267	0.901964	-0.485903	0.627036	0.87018
rna-NM_009912.4	19.5151	-0.939027	0.668669	-1.40432	0.160223	0.42792
rna-NM_207176.3	287.107	1.099	0.106165	10.3518	4.10538e-25	1.11952e-22
rna-NM_001205181.1	12.9284	-0.114954	0.589872	-0.194879	0.845488	0.955956
rna-XR_386023.4	166.236	-0.786233	1.02325	-0.768372	0.442266	0.75168
rna-NM_001256521.1	231.095	0.306715	2.67962	0.114462	0.908871	0.971878
rna-XM_006509227.4	145.794	-0.479785	0.358357	-1.33885	0.180621	0.458831
rna-NM_010690.1	156.573	0.391213	0.310668	1.25926	0.207936	0.501793
gene-Gm8974	15.921	0.366032	0.391263	0.935514	0.349523	0.669204
rna-NR_130971.1	13.7186	-1.05468	0.418742	-2.51868	0.0117796	0.0697161
rna-NM_138602.4	149.19	-0.1649	0.214058	-0.770353	0.441091	0.750852
rna-XM_036158029.1	361.396	-0.671047	0.268413	-2.50006	0.0124173	0.0725977
gene-Gm6563	421.155	-0.103299	0.234797	-0.439951	0.659972	0.88466
rna-NM_007492.4	23.4408	-0.954421	0.828557	-1.15191	0.249359	0.558592
rna-XM_006541197.2	29.5064	-1.72198	2.23981	-0.768804	0.44201	0.751412
rna-NM_027875.1	39.2114	-0.908064	2.35965	-0.38483	0.700363	0.900501
rna-NM_001372372.1	33.7416	-0.631842	0.8911	-0.709059	0.478288	0.778292
rna-NM_026455.5	895.247	-0.101607	0.182983	-0.555283	0.578701	0.844467
rna-XM_011243406.3	41.3298	-1.72835	1.85473	-0.931858	0.35141	0.671758
rna-XM_011247444.4	89.6164	-0.429976	0.591463	-0.726971	0.467244	0.769267
rna-XR_004940656.1	104.157	-0.82603	0.955832	-0.8642	0.387478	0.703421
rna-XM_030251199.1	9.82888	1.37856	1.54866	0.890161	0.37338	0.691619
rna-NR_040292.1	19.3788	-2.30286	2.04634	-1.12536	0.260437	0.573239
rna-XM_011245879.4	284.201	-0.196062	0.229037	-0.856026	0.391983	0.707144
rna-NM_027712.3	27.3044	0.199879	1.46468	0.136467	0.891452	0.967731
rna-NM_001289601.1	65.8708	-0.151427	0.474413	-0.319188	0.749584	0.920508
rna-XR_004938619.1	45.8146	-2.35345	1.14824	-2.04961	0.0404021	0.173406
rna-XR_004935826.1	189.341	-1.82856	1.22355	-1.49447	0.135053	0.384719
rna-NM_001355615.1	37.6622	-0.507553	0.992578	-0.511348	0.609107	0.86031
rna-XM_017313838.3	140.257	0.785126	2.00312	0.391952	0.695094	0.898374
rna-NM_001309808.1	34.8007	0.214641	1.45833	0.147183	0.882987	0.965544
rna-NM_030198.3	28.2644	-1.24183	0.757482	-1.63942	0.101127	0.321128
rna-NM_133224.2	122.563	0.690025	1.10051	0.627005	0.530656	0.813829
rna-XM_006513314.5	206.407	0.0965854	2.1928	0.0440467	0.964867	0.989091
rna-NM_028040.2	60.0429	-0.181817	0.414686	-0.438445	0.661064	0.884792
rna-NM_031256.3	158.152	0.870107	0.989235	0.879575	0.379089	0.696053
rna-XR_004934067.1	31.5915	0.308192	0.305344	1.00933	0.312818	0.631885
rna-XM_030243302.2	90.6514	-0.0891332	0.328241	-0.271548	0.78597	0.932413
rna-XM_011247881.4	421.128	-0.157656	0.298686	-0.527831	0.597617	0.853235
rna-XM_006499907.5	374.402	1.05946	0.240437	4.40638	1.05112e-05	0.000228331
rna-NM_007646.5	115.826	-0.304639	0.37276	-0.817251	0.413785	0.726937
rna-NM_001042407.1	50.0702	-0.356109	0.268429	-1.32664	0.184628	0.465178
rna-XR_004938039.1	57.7393	-0.643717	0.284092	-2.26588	0.0234589	0.117149
rna-NM_021459.4	13.2925	-0.425438	0.799401	-0.532195	0.594591	0.851109
rna-XM_006496041.3	421.623	0.471935	0.262108	1.80053	0.0717763	0.257118
rna-NM_021028.3	140.21	-1.12972	2.03918	-0.554008	0.579573	0.845212
rna-XM_017312341.3	219.891	0.437648	0.184049	2.37789	0.0174121	0.0937152
rna-XM_006523515.5	71.6025	-0.484276	1.85829	-0.260603	0.794399	0.934972
rna-XM_036157992.1	129.785	-0.386463	1.116	-0.346292	0.729123	0.912884
rna-XR_004933732.1	128.503	-0.912903	0.522938	-1.74572	0.0808597	0.277112
rna-XM_006540909.1	145.868	-0.279561	0.274809	-1.01729	0.309014	0.627786
rna-XM_036160779.1	25.7932	-0.362777	0.372291	-0.974444	0.329836	0.649256
rna-NM_008747.2	150.156	-0.316378	2.60331	-0.121529	0.903272	0.970647
rna-NM_010028.3	4265.58	0.756378	0.267721	2.82525	0.00472439	0.0350735
rna-NM_178598.2	4660.38	1.89726	0.242627	7.81968	5.29583e-15	5.69526e-13
rna-NM_010094.4	53.6409	-0.258644	0.259237	-0.997715	0.318417	0.636764
rna-NM_146047.2	662.355	-0.0139166	0.145914	-0.0953747	0.924017	0.976583
rna-NR_033553.1	22.5331	0.115861	0.849811	0.136337	0.891555	0.967731
rna-XM_030245001.1	31.5628	-1.69404	0.50013	-3.3872	0.000706108	0.0077968
rna-XM_036165143.1	131.53	-0.208543	0.229955	-0.906889	0.364465	0.683412
rna-XR_001778822.3	315.292	0.874183	0.789961	1.10662	0.26846	0.582241
rna-XR_387197.5	117.984	-0.157451	0.435458	-0.361575	0.717669	0.907937
rna-NM_178791.5	19.0786	-1.13157	0.398632	-2.83864	0.00453061	0.034099
rna-NR_168088.1	75.095	-1.24581	1.23695	-1.00716	0.313856	0.632646
rna-NM_001190414.2	88.0937	-0.129723	0.358499	-0.36185	0.717464	0.907888
rna-XM_006516938.3	300.614	-0.200137	1.29104	-0.155019	0.876806	0.964425
gene-Gm12834	41.785	-0.198732	0.387569	-0.512764	0.608116	0.859994
rna-NM_025352.3	2314.42	0.901467	0.182721	4.93358	8.07358e-07	2.34395e-05
rna-NM_138741.1	965.636	-1.18027	0.426377	-2.76813	0.00563787	0.0401754
rna-NM_001272033.1	20.642	0.369596	0.429482	0.860562	0.38948	0.704959
rna-NM_133800.3	43.1756	-0.630255	1.58485	-0.397674	0.69087	0.896803
rna-XM_030248690.1	948.025	0.144584	0.868785	0.166421	0.867826	0.963123
rna-NM_001364771.2	13.7346	-0.362299	0.994059	-0.364464	0.715512	0.907254
rna-NM_009516.3	87.4106	-0.201924	0.844588	-0.23908	0.811044	0.941902
rna-XM_030244475.2	747.254	-0.639326	0.192097	-3.32814	0.000874281	0.00922462
rna-XM_006527313.3	443.21	0.142756	0.23862	0.598258	0.549668	0.824544
gene-Gm4824	320.41	0.722134	0.142887	5.05387	4.32954e-07	1.32233e-05
rna-XM_030253081.2	140.069	-0.787724	1.64381	-0.479206	0.631792	0.8725
rna-XM_036162636.1	32.2927	-0.374447	1.02592	-0.364986	0.715122	0.907254
rna-XM_036158835.1	396.611	-0.663583	0.895806	-0.740766	0.458835	0.765015
gene-Rpl21-ps15	12.94	0.021926	0.332471	0.0659488	0.947419	0.983869
gene-Rpl21-ps11	115.797	0.283391	0.246978	1.14744	0.251202	0.561162
rna-NM_177261.4	227.941	-0.0436156	0.50605	-0.0861883	0.931317	0.978611
rna-NM_011401.4	180.44	0.539532	2.0539	0.262687	0.792792	0.934851
rna-NM_177152.5	53.3529	-1.30251	0.323446	-4.02698	5.64982e-05	0.000938829
rna-NM_025602.3	322.602	0.0918749	0.204338	0.449621	0.652983	0.88136
rna-XM_006526460.5	121.846	-0.439457	0.785803	-0.559245	0.575994	0.843338
rna-NR_015464.1	9.32174	0.546547	2.0889	0.261643	0.793596	0.934851
rna-NM_011266.2	46.9943	0.103118	0.290229	0.355299	0.722366	0.910363
rna-XM_006506311.5	201.324	-0.194982	0.132365	-1.47307	0.140733	0.394192
rna-NM_013765.2	1801.79	0.619325	0.165192	3.74913	0.00017745	0.00251143
rna-NM_019482.2	40.4446	0.646124	0.299432	2.15784	0.0309406	0.142834
rna-NM_001374654.1	217.251	-0.349717	1.15751	-0.302128	0.762554	0.924624
rna-XM_006497786.5	658.486	0.615888	2.8527	0.215897	0.829068	0.949576
rna-XR_003950455.1	562.858	0.292703	0.203043	1.44158	0.149421	0.409
rna-NM_027485.4	88.533	0.307582	0.281341	1.09327	0.274276	0.58848
rna-XM_006524675.5	139.415	-0.921925	1.1007	-0.837578	0.402268	0.717043
rna-NM_201227.3	41.3352	-0.906915	0.412383	-2.1992	0.0278634	0.132305
rna-XR_004941600.1	152.903	-1.94374	1.13827	-1.70762	0.0877064	0.291973
rna-XM_030249246.1	116.406	-0.536066	1.74531	-0.307146	0.758732	0.923288
rna-XR_004937203.1	33.7716	0.130518	0.36253	0.360021	0.718831	0.908489
rna-XM_011239857.4	213.331	-0.255825	1.13143	-0.226109	0.821117	0.946319
rna-NM_001379438.1	46.9887	0.210832	0.23342	0.903233	0.366402	0.684444
rna-NR_152614.1	97.9845	0.167573	0.951921	0.176037	0.860265	0.960581
rna-NM_001379392.1	17.4385	0.741335	0.675426	1.09758	0.272387	0.58595
rna-NM_001166370.1	31.6966	-0.0332023	0.409477	-0.0810848	0.935375	0.979975
rna-NM_153570.2	120.207	1.05877	0.22113	4.78797	1.68477e-06	4.56983e-05
rna-XM_011250093.4	17.3876	-0.914044	1.81273	-0.504236	0.614095	0.862985
rna-NM_010591.2	1643.18	1.53874	0.333414	4.61509	3.92917e-06	9.509e-05
rna-NR_028376.1	30.6751	-0.0476196	0.276269	-0.172367	0.863149	0.960865
rna-XR_004939287.1	41.1034	0.194237	0.316134	0.614415	0.538941	0.817946
rna-NR_167679.1	19.562	-0.849886	0.983113	-0.864485	0.387322	0.703221
rna-XM_011244066.4	617.12	-0.883883	1.0298	-0.858308	0.390722	0.706288
rna-NM_026272.3	90.0004	-0.806649	0.362641	-2.22438	0.0261232	0.126243
rna-XM_017317870.3	49.8538	-0.154771	1.44902	-0.106811	0.914939	0.974374
rna-XR_004937472.1	13.0575	-1.16749	1.67121	-0.69859	0.484808	0.783688
rna-NM_009780.2	271.296	2.62311	0.432755	6.06142	1.34926e-09	6.93757e-08
rna-NM_001290820.1	15.8196	-0.793142	1.6406	-0.483447	0.628779	0.871283
rna-NM_001081420.1	71.377	-0.609154	0.439814	-1.38502	0.166045	0.43743
gene-Gm8779	46.101	1.06956	0.257378	4.15561	3.24425e-05	0.0005905
rna-NM_007754.2	641.424	-0.133107	0.207308	-0.642073	0.520826	0.807491
rna-XM_036163205.1	76.3278	-0.112843	1.06464	-0.105991	0.915589	0.974761
rna-NM_026038.2	13.2836	-0.87577	0.561218	-1.56048	0.118646	0.355474
rna-NM_015827.2	566.833	0.162345	0.205399	0.790392	0.429299	0.740742
rna-XM_030252016.2	137.332	-0.397592	1.51343	-0.262709	0.792775	0.934851
rna-NM_016739.3	143.125	-1.56211	0.432294	-3.61355	0.000302037	0.00390882
rna-NM_146130.3	99.5513	-0.741417	1.36063	-0.544906	0.585818	0.847322
rna-XM_036165007.1	53.8544	0.465125	0.258364	1.80027	0.0718182	0.257148
rna-NM_019487.3	11.4589	0.44288	1.14541	0.386655	0.699012	0.899975
rna-NM_001290745.1	939.666	-0.00700286	0.24765	-0.0282773	0.977441	0.993643
rna-XM_017312865.3	112.03	0.102315	0.307604	0.332621	0.739421	0.917571
rna-NR_027943.1	88.3419	0.928667	0.343752	2.70156	0.00690158	0.0467172
rna-NM_001122759.2	77.5353	-0.485143	0.514174	-0.943539	0.345405	0.665715
rna-XM_036154270.1	13.4951	-0.833798	0.410987	-2.02877	0.0424816	0.17953
rna-XR_003951189.1	81.6785	-0.679155	0.596349	-1.13885	0.254764	0.56581
rna-XM_006523204.2	49.2954	-0.84163	2.41098	-0.349082	0.727028	0.911941
rna-XM_006521385.5	77.6133	0.682568	0.959022	0.711733	0.47663	0.777049
rna-NM_010879.3	33.893	1.15689	1.35907	0.851232	0.39464	0.709925
rna-NM_026465.3	133.441	-0.268358	0.432269	-0.620811	0.534724	0.816089
rna-XM_006496555.5	59.6897	0.282684	0.636397	0.444195	0.656902	0.882515
gene-Gm4986	29.6334	0.420027	0.296626	1.41602	0.156771	0.422082
rna-XM_036161107.1	72.621	-1.20761	0.986545	-1.22408	0.220923	0.519673
rna-NM_007891.5	34.6136	0.17425	0.61991	0.281088	0.778643	0.929538
rna-NM_010560.3	295.631	-0.878279	1.69606	-0.517836	0.604573	0.857953
rna-NM_019708.4	759.417	0.212551	2.46653	0.0861741	0.931328	0.978611
rna-XM_030254386.1	97.069	-0.0762463	0.947452	-0.0804752	0.935859	0.979975
rna-NM_013742.5	77.7399	-0.53746	0.457077	-1.17586	0.23965	0.544349
rna-XR_382235.4	37.6827	0.132902	0.994463	0.133642	0.893685	0.967945
rna-NM_010877.5	223.683	0.12482	0.201862	0.61834	0.536351	0.816427
rna-NM_023209.2	11.4677	-0.565431	1.66321	-0.339964	0.733884	0.914936
rna-XM_036159201.1	164.199	2.98418	1.08887	2.74063	0.00613218	0.0427992
rna-XM_036165882.1	47.4348	-1.65071	1.35551	-1.21778	0.223308	0.521762
rna-NM_025745.3	121.72	-0.628853	0.371005	-1.695	0.0900756	0.297801
rna-NR_155747.1	164.797	-0.45024	1.23969	-0.363189	0.716464	0.907254
rna-XM_036155023.1	68.0642	0.299567	0.263596	1.13646	0.255763	0.566777
rna-XR_386008.4	67.7856	-0.233317	0.239407	-0.974561	0.329778	0.649225
rna-XM_006495532.5	53.1706	-0.0735399	0.330457	-0.22254	0.823894	0.947271
rna-NM_011755.2	64.6738	0.307359	0.516825	0.594707	0.552039	0.826004
rna-XM_036155118.1	33.3666	-0.893226	0.502649	-1.77704	0.0755622	0.265435
rna-XM_006520052.4	99.0707	-0.334551	1.41598	-0.236268	0.813225	0.942577
rna-XM_036157281.1	177.527	1.21539	1.07444	1.13118	0.257979	0.569634
rna-NM_001134692.2	134.69	-0.135991	0.714486	-0.190334	0.849048	0.957262
gene-Gm3436	45.047	0.508626	0.316312	1.60799	0.107838	0.334306
rna-XM_036153703.1	318.988	-0.309229	0.179773	-1.72011	0.0854132	0.28711
rna-NM_008719.2	43.015	0.0921128	1.58731	0.0580307	0.953724	0.985141
rna-XR_004934226.1	58.1719	-2.66738	1.05749	-2.52236	0.011657	0.0691585
rna-XM_030246242.2	134.584	0.924551	0.801551	1.15345	0.248724	0.557702
rna-NM_001301652.1	111.745	0.234329	0.224392	1.04429	0.296353	0.61341
rna-XR_865942.3	74.7508	-2.13775	1.68171	-1.27118	0.203665	0.495723
rna-XM_030249041.2	982.151	0.346061	0.308961	1.12008	0.262681	0.575771
rna-NM_001162977.1	15.2803	-3.37425	0.814918	-4.1406	3.46398e-05	0.000620874
rna-XM_006520564.2	85.6589	1.03262	1.69904	0.607766	0.543343	0.820311
gene-Ppp1r2-ps1	74.0264	1.17449	0.184034	6.38191	1.74896e-10	1.0194e-08
gene-Gm10243	633.349	0.438419	0.179125	2.44756	0.0143826	0.0813443
rna-XM_006528557.5	19.8656	-1.18578	1.7108	-0.693113	0.488239	0.786097
gene-Cox5b-ps	602.062	0.6389	0.135332	4.721	2.34693e-06	6.0643e-05
rna-NM_027570.4	10.5576	1.39008	0.822504	1.69006	0.0910173	0.299618
rna-NM_016750.3	52.5523	0.724067	0.920434	0.786658	0.431482	0.743027
rna-NM_146178.2	38.9772	-0.844834	0.938637	-0.900065	0.368086	0.686245
rna-NM_026075.3	201.563	-0.492211	0.531632	-0.925849	0.354524	0.674552
rna-XM_006513899.2	315.573	0.115555	0.372166	0.310492	0.756187	0.922431
rna-NM_001355206.1	70.2103	-0.243635	0.391082	-0.622977	0.533299	0.815095
rna-NM_028900.4	142.009	0.028722	0.25649	0.111981	0.910839	0.972744
gene-Gm11263	651.725	0.714347	0.168967	4.22773	2.36064e-05	0.000450616
rna-XM_017319725.3	16.2347	0.202413	0.631188	0.320686	0.748448	0.920198
rna-XM_030245573.2	125.373	0.612566	0.207089	2.95798	0.00309658	0.0251933
rna-XM_036164067.1	189.695	-0.928989	0.339019	-2.74023	0.00613969	0.042832
rna-NM_134033.2	286.637	-0.611809	0.274738	-2.22688	0.0259553	0.12587
rna-NM_001346759.1	81.7138	-0.336409	0.332698	-1.01115	0.311943	0.630798
rna-XM_006503079.5	92.4567	-0.541997	0.86371	-0.627522	0.530317	0.813829
rna-NM_026305.2	1060.29	0.450096	0.103751	4.33821	1.43645e-05	0.000293655
rna-NR_027976.1	59.1092	-1.19283	0.502538	-2.37361	0.0176152	0.0945193
rna-NM_027106.4	218.707	1.57841	0.25029	6.30631	2.85773e-10	1.63447e-08
rna-NM_133804.2	75.2419	-0.591412	0.445653	-1.32707	0.184486	0.465052
rna-NM_144920.3	18.2587	-0.896822	1.48414	-0.604271	0.545663	0.821858
rna-NM_133735.2	500.831	0.162098	0.119038	1.36173	0.173282	0.449405
rna-NM_001355516.1	495.848	-1.16757	0.454924	-2.56651	0.0102728	0.0628414
rna-NM_026420.3	488.19	-1.19309	1.69893	-0.70226	0.482517	0.781805
rna-NM_033569.3	36.1774	-0.552435	0.360748	-1.53136	0.12568	0.368253
gene-Rps3a2	1656.26	0.245629	0.143305	1.71404	0.0865219	0.289469
rna-NM_009741.5	176.829	0.00806152	0.292139	0.0275948	0.977985	0.993695
rna-XR_004942517.1	447.331	-0.0657201	0.458507	-0.143335	0.886026	0.966283
rna-XM_011244651.4	153.102	-0.855784	0.362196	-2.36277	0.0181391	0.0965164
rna-XM_036156930.1	341.046	-0.802493	1.26881	-0.632478	0.527075	0.812275
rna-NM_133649.2	191.326	-0.642909	0.546625	-1.17614	0.239538	0.544343
rna-NM_028299.3	19.7702	-1.09055	1.69147	-0.644735	0.519099	0.806754
rna-NM_001363271.1	66.9234	-2.05922	0.842605	-2.44388	0.0145304	0.0818798
rna-XM_036161825.1	79.256	0.12108	0.995324	0.121649	0.903177	0.970647
rna-NM_001204973.1	2495.43	0.666738	0.16206	4.11414	3.88632e-05	0.000679816
rna-NM_001167879.1	23.8509	-0.846839	0.503536	-1.68179	0.0926104	0.303191
rna-NM_026515.2	39.2639	1.23429	0.516815	2.38826	0.0169282	0.091638
rna-NM_009262.3	296.671	0.0437745	0.183088	0.23909	0.811036	0.941902
rna-NM_027481.3	114.736	-0.129961	0.342956	-0.378943	0.70473	0.902764
rna-NM_053201.4	384.4	-0.392698	0.348761	-1.12598	0.260173	0.572907
rna-NM_001357294.2	73.0223	-0.579603	0.710973	-0.815224	0.414944	0.728262
rna-NM_028071.3	2905.57	0.29684	0.176699	1.67992	0.0929722	0.304086
rna-NM_001271388.1	218.815	-0.194112	0.23727	-0.818104	0.413298	0.726375
rna-XR_004939578.1	447.262	-0.282018	0.245343	-1.14948	0.250357	0.559883
rna-XM_017312662.3	70.8897	-1.29243	0.642095	-2.01283	0.0441329	0.184291
rna-NM_007651.3	2261.35	0.282951	0.248889	1.13685	0.2556	0.566594
rna-XM_006501639.3	51.8258	-0.181022	0.352323	-0.513796	0.607395	0.859639
rna-NM_001081750.1	564.822	-0.931231	0.177438	-5.2482	1.53592e-07	5.18915e-06
rna-NM_001012305.2	34.5003	-1.18354	1.21004	-0.978099	0.328026	0.647455
gene-Rpsa-ps9	430.61	0.612366	0.192841	3.17549	0.00149582	0.0141092
gene-Gm6104	20.3239	0.785611	0.70165	1.11966	0.262858	0.575986
rna-NR_133670.1	1885.68	2.1878	1.44631	1.51268	0.130362	0.376898
rna-NM_001166629.2	305.987	-0.333998	0.260767	-1.28083	0.200253	0.490467
rna-NM_001308168.1	116.003	-0.501618	0.93843	-0.534529	0.592975	0.850135
rna-XR_004942927.1	86.1437	-0.535922	0.293776	-1.82425	0.0681137	0.24819
rna-XM_030250334.2	17.1137	-0.313104	0.400581	-0.781624	0.434436	0.74582
rna-NM_019405.6	474.568	-0.492712	0.257285	-1.91505	0.0554866	0.215827
rna-NR_045007.1	17.3598	1.24398	0.808975	1.53772	0.124116	0.365491
rna-NM_001360173.1	577.259	0.762481	0.34758	2.19368	0.0282582	0.133312
gene-Gm14231	8.8588	0.357494	0.400603	0.89239	0.372184	0.690263
rna-NM_001081109.2	38.9517	0.4948	0.73678	0.671571	0.501857	0.79582
gene-Gm15542	336.284	-0.365541	0.246794	-1.48116	0.138564	0.390553
rna-NM_026282.6	16.0355	-0.362574	0.964513	-0.375914	0.706981	0.903986
rna-XM_006521980.4	246.403	-0.233672	2.14063	-0.109161	0.913075	0.973645
rna-NM_020584.2	312.524	-0.195186	0.11335	-1.72198	0.0850734	0.286433
rna-XM_030244918.2	18.3626	-1.57512	1.45234	-1.08454	0.278126	0.592073
rna-XM_030253403.2	151.295	1.54982	1.50331	1.03094	0.302569	0.620288
rna-XM_006510947.4	23.6235	-0.964263	0.84961	-1.13495	0.256397	0.567562
gene-Gm14494	302.331	0.746237	0.161118	4.63162	3.62819e-06	8.90233e-05
rna-NM_001164580.1	117.199	-0.0997709	0.255577	-0.390375	0.696259	0.89858
rna-NM_001159617.1	95.0808	-0.736209	0.268941	-2.73744	0.00619194	0.0431374
rna-XR_004939312.1	45.0339	-0.868134	1.88525	-0.460486	0.645167	0.877043
rna-XM_030252809.2	110.168	0.466463	0.760041	0.613734	0.539391	0.818179
rna-NM_001177601.1	231.82	1.88216	0.452227	4.16197	3.15519e-05	0.000577733
rna-NM_022319.2	39.6274	-0.921733	1.91972	-0.480139	0.631128	0.872262
rna-NM_001172146.1	175.316	0.511814	0.261938	1.95395	0.0507069	0.20324
gene-Gm10073	2235.76	0.044161	0.17294	0.255354	0.79845	0.936996
gene-Gm10076	2736.54	0.468627	0.176318	2.65785	0.00786408	0.0513215
rna-XR_004936381.1	30.7392	-2.23853	1.46833	-1.52454	0.127373	0.37086
rna-NM_175312.4	289.043	-0.467179	0.280257	-1.66697	0.0955211	0.309638
rna-XM_006530150.5	404.006	-1.33411	0.660855	-2.01876	0.0435121	0.182682
rna-XM_017320717.2	172.37	0.349015	0.411176	0.84882	0.395982	0.710679
rna-NR_045561.1	113.267	-1.05882	0.398751	-2.65534	0.00792294	0.0516174
rna-NM_172581.3	16.1734	-1.52306	0.753189	-2.02215	0.0431613	0.181725
rna-NM_028230.4	20.9923	0.208779	0.514767	0.40558	0.685051	0.894291
rna-NM_001384266.1	58.037	-0.566208	0.396287	-1.42878	0.153067	0.415252
rna-XM_006520617.4	34.4383	2.33654	1.21442	1.92399	0.054356	0.213331
rna-XM_006495645.5	28.6573	-0.395185	0.47493	-0.832091	0.405357	0.719896
rna-NM_001358253.1	57.2696	-0.910829	0.737952	-1.23426	0.217104	0.514834
rna-NM_010131.2	46.0937	0.27354	0.900593	0.303733	0.761331	0.924014
rna-XM_036152934.1	38.7908	-1.13918	0.627501	-1.81542	0.069459	0.251353
rna-XM_006511443.5	34.6467	-1.81488	1.05006	-1.72836	0.0839239	0.284358
rna-NM_001029873.2	372.787	-0.839502	0.471311	-1.78121	0.0748789	0.264265
rna-NM_001363812.1	82.4641	-0.705865	0.734599	-0.960885	0.33661	0.656832
rna-NM_013863.5	408.073	1.2727	0.375413	3.39012	0.000698614	0.00773209
rna-XR_374081.5	36.3484	1.0116	0.432125	2.34099	0.0192326	0.100755
rna-XM_030245487.1	102.107	-0.137332	0.786642	-0.17458	0.86141	0.96079
rna-NM_175283.3	21.0237	-1.24392	0.736424	-1.68913	0.0911943	0.299977
rna-XR_004942128.1	119.995	0.130943	0.411333	0.318339	0.750228	0.920524
rna-XM_006501860.2	15.3089	-0.166847	0.542991	-0.307275	0.758634	0.923288
rna-NR_151538.1	11.8529	-1.47412	1.22007	-1.20823	0.226959	0.526693
rna-XM_006538988.5	25.3022	0.311813	0.552421	0.564448	0.57245	0.840353
rna-XM_036161552.1	134.019	-1.00949	0.325369	-3.10259	0.00191836	0.0172732
rna-NM_001360917.1	83.4651	-0.203492	0.214347	-0.949359	0.342438	0.66371
rna-XR_004942485.1	54.6588	-0.267669	0.34192	-0.782842	0.43372	0.745116
rna-NM_001357372.1	846.849	-0.225988	0.208672	-1.08298	0.278816	0.593009
rna-NM_001364260.1	114.951	-0.583924	0.44038	-1.32595	0.184855	0.465521
rna-NM_001357533.1	33.2208	0.789132	0.323249	2.44125	0.0146365	0.0823558
rna-XR_003946583.2	33.6065	0.452808	0.68815	0.658008	0.510533	0.800695
rna-NR_153764.1	1535.11	0.353823	0.126223	2.80316	0.00506047	0.0369577
rna-NM_026943.1	446.612	0.2413	0.242456	0.995232	0.319624	0.638584
rna-XM_036166110.1	35.0915	-0.455563	0.857412	-0.531323	0.595195	0.85145
rna-NM_027226.4	90.3973	-0.0151609	0.574309	-0.0263985	0.978939	0.993909
rna-NM_001331195.1	43.5032	-0.97058	0.399783	-2.42777	0.0151922	0.0844865
rna-NM_009227.3	501.054	0.501868	0.165982	3.02363	0.00249761	0.0212722
rna-XM_017315242.3	19.093	-3.12445	1.41067	-2.21487	0.0267692	0.128551
rna-NM_028117.3	116.819	-0.109809	0.263331	-0.417	0.676678	0.890658
rna-NM_001362067.1	11.9753	0.488821	1.25268	0.39022	0.696374	0.89858
rna-NM_001271447.1	37.5249	-1.03402	2.07941	-0.497267	0.619001	0.865637
rna-NM_024175.3	2129.25	0.303269	0.171558	1.76773	0.0771053	0.269144
rna-NM_145564.4	82.467	2.85722	0.90181	3.16832	0.00153324	0.0143998
rna-XM_017314101.3	70.9834	-3.58918	1.90929	-1.87985	0.0601287	0.228017
rna-NM_016806.3	20.6931	-0.105574	0.877895	-0.120258	0.904279	0.970773
rna-NM_009382.3	736.008	-0.0178228	0.161516	-0.110347	0.912134	0.973304
rna-NM_176921.4	58.9684	-0.778196	0.916117	-0.84945	0.395631	0.710452
rna-XM_006501526.5	12.5603	-1.17054	1.25079	-0.935837	0.349357	0.669054
rna-NM_029643.4	95.9538	-0.612407	0.318596	-1.92221	0.0545796	0.213879
rna-NM_010307.3	178.692	-0.763297	2.63137	-0.290076	0.771758	0.927616
rna-NM_001166651.2	62.8903	-0.283383	0.664885	-0.426214	0.669952	0.887847
rna-NM_026876.4	74.1492	-0.616754	1.06781	-0.577587	0.563543	0.833671
rna-NM_146106.2	20.0896	-1.53734	1.18839	-1.29363	0.195793	0.483185
rna-NM_008078.2	301.272	-0.0304992	0.299511	-0.10183	0.918892	0.975607
rna-XM_036156190.1	54.4965	0.903245	0.913206	0.989092	0.322618	0.64225
rna-XM_036162915.1	19.96	1.35101	1.00172	1.34868	0.177438	0.45426
rna-XM_006496702.2	2214.24	0.270676	1.28517	0.210615	0.833187	0.951794
rna-NM_007761.2	78.1133	0.00343625	0.188881	0.0181927	0.985485	0.996047
rna-XR_004934413.1	16.9946	0.330344	0.929942	0.355231	0.722417	0.910363
rna-XM_006527406.4	46.5667	-2.15474	2.28175	-0.944339	0.344997	0.665567
rna-NM_181418.3	202.687	-2.08943	0.781792	-2.67262	0.00752614	0.049668
rna-XR_001785494.3	281.813	-1.18682	1.15179	-1.03041	0.302817	0.62063
rna-XM_036160879.1	49.2879	0.517189	0.219671	2.35438	0.0185539	0.0979385
rna-XM_006526294.4	18.323	-0.648521	0.563177	-1.15154	0.24951	0.55869
rna-NM_012002.3	364.355	0.416783	0.124309	3.35279	0.000800025	0.00857486
rna-NM_175930.6	518.099	0.78163	0.53733	1.45466	0.145764	0.403109
rna-NM_025887.4	299.09	0.566037	0.253752	2.23067	0.0257029	0.124891
rna-NM_001305800.1	14.119	2.58863	1.37625	1.88094	0.0599807	0.227805
rna-NM_009530.2	1328.41	-1.09453	0.282614	-3.87289	0.00010755	0.00163912
rna-NM_023203.1	213.64	0.52768	0.133318	3.95804	7.55664e-05	0.00121599
rna-NM_001359629.1	152.33	0.0992558	0.238587	0.416015	0.677399	0.890844
rna-XR_004940679.1	201.393	-1.46607	0.715243	-2.04975	0.0403884	0.173396
rna-NM_009804.2	470.439	-0.711842	0.240725	-2.95707	0.00310577	0.0252546
rna-XM_006496028.5	156.864	-0.571279	0.29752	-1.92013	0.054841	0.214243
rna-XR_003949381.2	123.972	-0.56493	0.366991	-1.53936	0.123717	0.364882
rna-NM_009283.4	613.126	1.71905	0.69276	2.48145	0.0130848	0.0756029
rna-XM_036156137.1	257.897	0.315138	0.18548	1.69904	0.0893111	0.29597
rna-NM_001083906.2	72.7449	-0.375704	0.233393	-1.60974	0.107454	0.333525
rna-XM_030242693.2	15.7835	0.121646	0.317244	0.383448	0.701388	0.901363
rna-XM_006500158.5	16.888	1.43834	1.26149	1.1402	0.254205	0.565224
rna-NM_025560.3	28.8139	-0.308778	0.48931	-0.631048	0.528009	0.812524
rna-NM_007915.6	218.987	-0.469575	0.140614	-3.33945	0.000839438	0.00890212
rna-NM_133705.2	515.11	0.150214	0.218238	0.688307	0.49126	0.788322
rna-NM_001130408.1	1986.84	0.416736	0.11628	3.58392	0.000338479	0.00428245
rna-NM_153526.5	183.287	0.196598	0.28467	0.690617	0.489807	0.787351
rna-NM_011650.4	514.546	-0.0299086	0.263729	-0.113406	0.909708	0.972091
rna-XM_006517275.3	178.597	-0.00647815	1.55712	-0.00416033	0.996681	0.999443
rna-NM_009156.2	544.85	0.490274	0.10784	4.5463	5.4596e-06	0.000128465
rna-XM_006523754.4	109.319	-0.0836517	0.683891	-0.122317	0.902648	0.970647
rna-NM_016792.4	205.526	1.08161	0.492772	2.19496	0.0281667	0.133045
rna-NM_027439.4	1893.04	0.517008	0.243914	2.11963	0.0340374	0.152788
rna-NM_007883.3	12.3898	-0.901558	0.498673	-1.80792	0.0706196	0.254227
rna-NM_177565.3	38.114	-0.111969	0.518481	-0.215956	0.829022	0.949576
rna-XM_030254927.2	219.498	-1.91216	1.78255	-1.07271	0.283401	0.598591
rna-XM_006521254.4	123.375	-0.00220402	0.337863	-0.00652341	0.994795	0.999443
rna-XM_006512242.4	48.5534	-0.326662	1.06625	-0.306367	0.759325	0.923288
rna-NM_019980.2	1436.1	3.13639	0.644098	4.86943	1.1192e-06	3.15558e-05
rna-NM_001368332.1	101.012	1.12566	1.45655	0.772825	0.439626	0.750534
rna-NM_025992.2	174.573	0.490723	0.469925	1.04426	0.296366	0.61341
rna-NR_002889.2	51.5716	0.456747	0.256198	1.78279	0.074621	0.26391
rna-NM_021505.3	71.4238	-0.780009	0.220109	-3.54375	0.000394485	0.00485038
rna-NM_013755.4	75.8095	0.719499	2.43231	0.29581	0.767376	0.92575
rna-NM_145585.3	203.002	0.0974478	0.262212	0.371638	0.710163	0.904877
rna-NM_175752.3	64.1586	0.291798	0.476797	0.611997	0.54054	0.818826
rna-XR_871081.3	203.958	-0.771698	0.384913	-2.00487	0.0449775	0.186644
rna-NM_001164216.1	638.586	0.2561	0.29472	0.868958	0.38487	0.701043
rna-XM_006497438.4	105.66	1.8259	1.15885	1.57562	0.115114	0.349007
rna-NM_001291865.1	1434.88	3.26678	2.18999	1.49168	0.135782	0.385557
rna-NM_028850.5	341.699	0.693335	0.204828	3.38496	0.000711882	0.00783224
rna-NM_011239.2	361.442	0.585938	0.220574	2.65643	0.00789725	0.051494
rna-NM_009930.2	21.9897	-3.91675	1.20425	-3.25244	0.0011442	0.0113168
rna-NM_019715.2	107.242	-0.15414	0.305713	-0.504198	0.614122	0.862985
rna-XM_036157376.1	34.6319	0.0154495	0.563705	0.0274071	0.978135	0.993695
gene-Gm12501	20.2703	0.226166	0.452444	0.499876	0.617162	0.864286
rna-XR_003946419.2	355.009	0.514666	1.10282	0.466682	0.640728	0.876005
rna-XM_006531082.2	44.2557	-0.231005	0.266553	-0.866637	0.386141	0.702246
rna-NM_134189.2	134.421	-1.33687	0.410786	-3.25442	0.00113623	0.0112598
rna-NM_001368287.1	70.7766	-1.04763	0.601405	-1.74198	0.0815125	0.278723
rna-NR_152856.1	79.7767	0.458461	0.317332	1.44474	0.148532	0.407369
rna-XM_036155421.1	140.823	-0.199362	0.273654	-0.728518	0.466297	0.76907
rna-NM_020256.2	115.099	-0.231158	1.16243	-0.198857	0.842375	0.955004
rna-NM_020578.3	566.83	0.460306	0.135272	3.40281	0.000666962	0.00745075
rna-NM_026950.4	275.649	0.317325	0.712122	0.445605	0.655882	0.882341
rna-NM_001146299.1	13.5394	0.86199	1.60375	0.537485	0.590933	0.849513
rna-XM_030250829.1	61.8395	-0.135192	0.285205	-0.474015	0.635489	0.872869
rna-XM_011239961.2	390.664	0.0955109	0.205961	0.463733	0.642839	0.876283
rna-NM_026833.1	92.3852	0.442146	0.965655	0.457871	0.647045	0.878528
rna-NM_013841.3	98.8976	-0.554121	0.287819	-1.92524	0.054199	0.212879
gene-ND2	3772.38	0.390494	0.45427	0.859608	0.390005	0.705409
gene-ND1	7476.28	0.845303	0.433614	1.94944	0.0512432	0.204531
gene-ND6	1675.66	0.257928	0.41672	0.618947	0.535952	0.816329
gene-ND5	1466.8	0.419243	0.4346	0.964664	0.334713	0.655224
rna-NM_009425.2	229.581	-0.314523	0.473765	-0.663879	0.506768	0.798478
rna-XM_030249939.2	37.6619	0.070862	1.04717	0.0676701	0.946048	0.983217
gene-Gm11889	39.153	-0.418653	0.371901	-1.12571	0.260287	0.573075
rna-NM_001193666.1	30.9172	1.34489	0.57678	2.33172	0.0197157	0.102652
rna-NM_172422.3	32.1659	-0.160494	1.31577	-0.121977	0.902917	0.970647
rna-XM_006502405.5	80.3529	0.19922	1.71531	0.116143	0.90754	0.971574
rna-XM_036155449.1	57.5675	-0.105757	1.4286	-0.0740281	0.940988	0.982203
rna-NM_001214911.2	41.4163	-0.628411	0.283803	-2.21425	0.0268114	0.128673
rna-NM_138953.2	151.765	0.558364	0.280409	1.99125	0.0464537	0.191366
rna-XR_003953684.2	13.5417	-0.45806	1.06851	-0.428689	0.66815	0.887396
gene-Gm4540	165.405	0.461076	0.300508	1.53432	0.12495	0.366804
rna-XM_006533548.3	111.961	-1.77167	1.10877	-1.59788	0.11007	0.338341
rna-NR_156743.1	324.682	-0.176727	0.161204	-1.09629	0.272952	0.586541
rna-XM_006540826.5	94.048	-0.707673	0.752765	-0.940098	0.347167	0.667202
rna-NM_021336.4	180.629	0.766482	0.165284	4.63736	3.52893e-06	8.69198e-05
rna-NR_152246.1	85.5794	-0.364339	0.711245	-0.512255	0.608473	0.859994
rna-NM_147778.4	413.842	-0.143512	0.142817	-1.00487	0.314961	0.633699
rna-XR_382078.3	91.067	-1.03092	0.736694	-1.39939	0.161696	0.430592
rna-NM_011448.4	826.392	-0.436034	0.226433	-1.92567	0.0541458	0.212779
rna-XM_036163253.1	176.348	-0.0310664	0.310794	-0.0999583	0.920377	0.975811
rna-XM_036158551.1	172.975	-1.43258	2.70021	-0.530544	0.595735	0.851504
rna-NM_001359449.1	26.3379	-0.0676505	0.439962	-0.153764	0.877796	0.964484
rna-NM_001205391.1	152.178	0.143578	0.918199	0.15637	0.875742	0.964425
rna-NM_020275.4	73.2735	2.61664	0.670709	3.90131	9.56732e-05	0.00148706
rna-NM_009730.3	211.308	-0.779331	0.217671	-3.58032	0.00034317	0.00432745
rna-XR_385319.4	353.172	-0.12716	0.178743	-0.711411	0.476829	0.777208
rna-NM_018851.4	318.007	2.41887	0.32382	7.46978	8.03281e-14	7.25852e-12
rna-NM_025945.3	128.382	0.178104	0.223845	0.795657	0.426232	0.739405
rna-NM_145076.4	99.5318	-3.37149	1.25049	-2.69612	0.00701518	0.047181
rna-NM_025912.4	91.7137	-0.201046	0.355329	-0.565803	0.571528	0.840105
rna-XM_030255504.2	131.612	-0.95931	1.59468	-0.601569	0.547461	0.823195
rna-XM_030243045.2	49.2349	-0.336145	1.16231	-0.289205	0.772425	0.927826
gene-Gm6794	25.3426	-0.738985	0.85045	-0.868934	0.384883	0.701043
rna-XR_001780011.2	44.8107	-0.921757	1.22302	-0.753672	0.451046	0.758165
rna-NM_001347382.1	493.921	1.75228	0.192115	9.12095	7.44695e-20	1.27778e-17
rna-XR_004938585.1	22.8178	-1.41858	1.68505	-0.841858	0.399867	0.71453
rna-NM_001085385.1	113.14	-0.088847	0.895199	-0.0992483	0.920941	0.975827
gene-Psenen-ps	415.605	0.300497	0.206892	1.45243	0.146381	0.404083
rna-NM_007682.3	712.366	0.237939	0.200654	1.18582	0.235695	0.539112
gene-Gm6335	61.321	-0.103451	0.189938	-0.544655	0.585991	0.847354
rna-NM_175104.5	185.753	-0.515732	1.19196	-0.432677	0.665249	0.886577
rna-NM_175287.4	193.827	-0.116674	0.678443	-0.171973	0.863459	0.961012
rna-XM_006521769.4	108.731	-0.755743	0.362314	-2.08588	0.0369895	0.162645
gene-Mif-ps3	40.9836	1.21603	0.219757	5.53351	3.13894e-08	1.24183e-06
gene-Gm8599	121.201	0.694047	0.204737	3.38994	0.000699081	0.00773209
rna-XM_006510073.4	91.0944	0.260535	0.578989	0.449983	0.652722	0.881242
rna-XM_006514625.5	717.292	-0.349842	0.188941	-1.85159	0.0640841	0.237935
rna-NM_172260.3	121.196	-1.61689	0.392217	-4.12244	3.74884e-05	0.000662788
rna-NM_008390.2	999.184	3.96613	1.17222	3.38343	0.000715878	0.00786487
rna-NR_153435.1	102.232	0.095835	0.242624	0.394995	0.692847	0.897624
rna-NM_001285907.1	13.9068	-0.245018	0.355441	-0.689335	0.490613	0.787984
rna-NM_001159724.1	148.557	1.07113	0.196187	5.45974	4.76842e-08	1.80333e-06
rna-XM_030246651.1	204.613	0.500753	0.281741	1.77736	0.0755098	0.265388
rna-NR_104287.1	105.427	0.747997	0.418908	1.78559	0.0741663	0.262844
rna-XM_030247756.1	37.483	0.256911	0.358848	0.715934	0.474032	0.774468
rna-XM_006526428.3	182.939	0.0331198	0.159729	0.207349	0.835737	0.952574
rna-NM_009716.3	143.288	-0.438617	1.24196	-0.353165	0.723965	0.911131
rna-XM_030253511.2	84.8354	-0.167018	1.2396	-0.134736	0.89282	0.967901
rna-XR_379397.2	500.765	-0.0257702	2.82697	-0.00911583	0.992727	0.998758
rna-XM_036165204.1	41.4879	-0.851513	0.432544	-1.96862	0.0489973	0.198788
rna-XR_004942930.1	76.0655	-2.5452	1.65842	-1.53472	0.124854	0.366633
rna-NM_001368667.1	37.676	-1.18858	2.40641	-0.493924	0.62136	0.866645
rna-NM_008944.2	1607.38	0.889178	0.216765	4.10204	4.09523e-05	0.000710662
rna-NM_029305.2	33.2088	3.57816	1.55385	2.30277	0.0212916	0.108926
gene-Gm7867	91.8703	0.501743	0.290033	1.72995	0.0836398	0.28371
rna-XM_006517305.5	144.148	-0.226334	0.909645	-0.248816	0.803503	0.938811
rna-NM_198614.3	22.5094	-0.553319	0.331895	-1.66715	0.0954848	0.309586
rna-XM_011249655.4	281.992	0.385915	0.282787	1.36469	0.172352	0.447692
rna-XM_006527629.5	88.8518	-0.570533	0.305954	-1.86477	0.0622139	0.233719
rna-NM_026402.3	266.533	-0.100321	0.140099	-0.716076	0.473944	0.774407
rna-NR_027901.1	376.592	-0.699864	0.46717	-1.49809	0.134109	0.38323
rna-NM_001081114.2	322.372	-3.35446	0.875913	-3.82967	0.000128313	0.00190786
rna-NM_001113368.1	105.796	0.0305289	0.331239	0.0921659	0.926566	0.978044
rna-NM_199042.2	101.464	-0.446327	0.335183	-1.33159	0.182995	0.462438
rna-XM_006515853.5	83.5316	-0.354627	0.423688	-0.836999	0.402593	0.717219
rna-NM_153780.3	30.8222	-0.776605	0.855585	-0.907688	0.364043	0.683213
rna-NM_011341.5	988.597	0.0559786	0.131881	0.424463	0.671228	0.88814
rna-XM_030242740.1	73.0726	-0.170321	2.00363	-0.085006	0.932257	0.978655
rna-NM_010122.2	29.7006	0.0137267	0.886558	0.0154831	0.987647	0.996653
rna-NM_001142727.1	192.645	0.955518	1.57016	0.608547	0.542825	0.820172
rna-NM_009104.2	18.0984	1.11851	0.573309	1.95098	0.0510594	0.204117
rna-XR_003948066.2	98.6238	0.933954	1.10182	0.84765	0.396633	0.711164
rna-NM_177721.4	124.219	-0.32298	0.26766	-1.20668	0.227557	0.527317
rna-XM_006524891.5	106.321	-3.88633	1.39861	-2.77872	0.0054574	0.039163
rna-XR_004940158.1	228.284	0.180009	0.237451	0.758089	0.448398	0.756185
rna-NM_133674.1	47.427	0.00825612	0.900935	0.00916394	0.992688	0.998758
gene-Gm40238	146.493	3.27185	0.427287	7.65726	1.89942e-14	1.89582e-12
rna-XM_030248493.2	223.277	-0.767924	0.426358	-1.80113	0.0716831	0.257026
rna-NM_001256055.1	731.96	0.0317602	0.270399	0.117457	0.906498	0.971562
rna-NM_008094.6	155.738	0.296476	1.63997	0.180781	0.856539	0.959715
rna-NM_001163170.1	99.1285	0.330781	0.334667	0.988388	0.322963	0.642694
rna-NM_001362682.1	213.241	-0.440665	0.300292	-1.46746	0.142252	0.396411
rna-NM_028013.3	342.415	0.76122	0.233853	3.25513	0.00113341	0.0112392
rna-XM_006521751.5	1197.05	-0.255895	0.150758	-1.69738	0.0896243	0.296695
rna-NM_013852.2	130.127	-0.296161	0.263623	-1.12343	0.261256	0.573944
rna-NM_009450.2	1162.15	0.225411	0.126221	1.78585	0.0741233	0.262759
rna-NM_021880.4	709.542	1.09861	0.173478	6.33283	2.40711e-10	1.39239e-08
rna-NM_011669.3	150.315	-0.717474	0.763847	-0.939291	0.347582	0.667579
rna-XM_006540580.4	221.613	-1.68838	0.671443	-2.51455	0.0119184	0.0702994
rna-NM_133685.2	914.46	0.41945	0.26339	1.59251	0.111271	0.340797
rna-XR_877682.3	32.0572	-0.867984	0.321735	-2.69782	0.00697944	0.0470503
rna-NM_178056.3	283.566	-0.353506	1.02964	-0.343331	0.73135	0.9141
rna-NM_001080780.1	60.4106	-0.331061	0.390804	-0.847128	0.396924	0.711268
rna-NM_001252684.1	73.8748	-1.13523	2.45122	-0.463128	0.643273	0.876283
rna-XM_011242442.4	696.213	-0.718842	0.487814	-1.4736	0.14059	0.393974
rna-NM_026242.3	2788.55	0.0916807	0.116309	0.788251	0.43055	0.742502
rna-NM_001348260.1	111.241	0.131119	0.320098	0.409622	0.682083	0.892561
rna-NM_008312.4	75.874	0.156849	0.687771	0.228054	0.819604	0.945769
rna-NM_025485.3	46.5858	0.413894	1.87262	0.221024	0.825074	0.947432
rna-XM_006498682.1	17.1568	-0.332728	0.570966	-0.582745	0.560065	0.831313
rna-NM_019773.2	143.614	0.46891	2.05805	0.227842	0.819769	0.945844
rna-XM_006517409.5	195.964	-0.936772	0.495197	-1.89171	0.0585292	0.223753
rna-XM_036160669.1	29.8595	0.169779	0.54138	0.313605	0.753821	0.92174
rna-XR_868886.4	68.1181	-0.315423	0.286026	-1.10278	0.270124	0.58376
gene-Gm5537	520.639	1.55527	0.14905	10.4346	1.72399e-25	4.87538e-23
gene-Gm5539	538.107	-0.17584	0.116378	-1.51095	0.130801	0.377519
rna-NM_001357512.1	82.7619	-0.256354	0.329542	-0.777908	0.436623	0.748006
rna-XM_030247437.2	12.7161	-0.66676	0.799001	-0.834492	0.404004	0.71842
rna-XM_030246535.2	146.866	-0.493206	0.736282	-0.66986	0.502947	0.796066
rna-NM_011698.1	116.016	-0.593934	0.224281	-2.64817	0.00809296	0.0522728
rna-NM_199145.2	454.962	0.610401	0.237876	2.56605	0.0102865	0.0628414
rna-XM_030253652.2	29.8618	-0.335665	1.85955	-0.180509	0.856753	0.959715
rna-XM_006500216.5	82.4792	-0.835592	0.169818	-4.92051	8.6321e-07	2.4825e-05
rna-XM_006520926.4	73.0316	-0.249193	1.00209	-0.248674	0.803613	0.938811
rna-NM_023210.4	266.671	1.36862	0.283928	4.82028	1.43354e-06	3.97306e-05
gene-Gm7368	39.075	-0.461542	0.240004	-1.92306	0.0544721	0.213567
gene-Gm7363	41.1291	0.635136	0.342688	1.85339	0.063826	0.237323
rna-NM_172713.2	144.018	0.926855	0.299126	3.09855	0.00194473	0.0174592
rna-NM_023716.2	789.563	0.140288	0.257888	0.543988	0.586449	0.847456
rna-XM_036157397.1	649.352	-0.619969	0.379707	-1.63276	0.10252	0.323959
rna-NM_025337.3	102.061	-0.509799	1.25812	-0.405206	0.685326	0.894549
rna-NM_011300.3	431.578	0.482581	0.154012	3.1334	0.00172796	0.0159154
rna-NR_151737.1	110.335	-3.5572	2.28919	-1.55392	0.120204	0.358874
gene-Gm7589	127.516	0.217506	0.345795	0.629002	0.529348	0.813107
rna-XM_036158692.1	10.8796	-0.904579	2.05995	-0.439127	0.660569	0.884792
rna-NM_001311109.1	554.69	-0.239078	0.0881914	-2.7109	0.00671011	0.0456759
rna-NR_153321.1	61.4534	-0.685603	0.528819	-1.29648	0.19481	0.48213
rna-NM_001289630.1	79.0525	-1.21127	0.176247	-6.87258	6.30519e-12	4.49937e-10
rna-NM_133749.2	123.421	0.344628	1.80534	0.190894	0.848609	0.957246
rna-XM_036155098.1	12.3623	0.223513	1.71521	0.130312	0.89632	0.968897
rna-XR_004940132.1	109.958	0.177946	0.214979	0.827736	0.40782	0.722327
rna-NM_001286608.1	625.832	0.549412	1.1507	0.477457	0.633037	0.872869
gene-Gm5981	18.3049	-0.351243	0.697768	-0.503381	0.614697	0.86324
rna-XM_036158555.1	78.8147	-0.106923	0.428427	-0.249571	0.802919	0.938567
rna-NM_138665.2	40.8836	-0.711465	0.355493	-2.00135	0.0453546	0.187903
rna-XM_006497948.5	208.075	-1.05314	1.03551	-1.01703	0.309138	0.627786
rna-XM_011244658.3	51.533	0.0459567	0.285742	0.160833	0.872225	0.963773
rna-NM_019776.2	130.834	4.84252	1.17149	4.13363	3.57085e-05	0.000637039
rna-NM_001145801.1	170.446	3.64657	0.420491	8.67216	4.23992e-18	6.10829e-16
gene-Gm7926	438.892	0.52441	0.222576	2.35609	0.0184686	0.097691
rna-XM_006498991.5	64.2233	0.822929	1.50209	0.547854	0.583792	0.846428
gene-Gm9387	7.53618	-0.387101	0.799101	-0.484421	0.628087	0.87069
gene-Gm9386	136.154	-0.0798031	0.316299	-0.252303	0.800807	0.937602
rna-NM_001358971.1	92.0547	-0.0882974	0.293247	-0.301103	0.763336	0.925072
rna-NM_007531.2	664.607	0.628115	0.186691	3.36446	0.000766942	0.00828873
rna-XM_006509485.5	13.1808	0.601104	0.708968	0.847858	0.396517	0.711039
rna-NM_001161822.1	134.896	-0.0360731	0.266141	-0.135541	0.892184	0.967731
gene-Rpl30-ps9	375.536	0.100774	0.108757	0.926599	0.354135	0.67425
rna-NM_016850.3	266.94	1.98785	0.816161	2.43561	0.0148667	0.0831526
rna-XM_030244102.1	570.217	-0.610939	0.243223	-2.51185	0.01201	0.0707037
gene-Gm8034	943.274	1.27079	0.189827	6.69447	2.16454e-11	1.4691e-09
rna-NM_013706.2	1128.65	1.00977	0.193105	5.22914	1.70304e-07	5.67841e-06
rna-XM_017317970.3	295.39	2.33392	0.866319	2.69407	0.00705854	0.0473598
rna-XM_006526150.3	298.977	-0.0857577	1.16114	-0.0738563	0.941125	0.982203
gene-Rab11b-ps2	274.633	0.398148	0.216108	1.84236	0.0654231	0.241264
rna-NM_011198.4	482.933	3.50055	0.298511	11.7267	9.30318e-32	4.43965e-29
rna-NM_007672.2	74.7557	1.09247	0.916332	1.19222	0.233176	0.535787
rna-XM_036157159.1	307.895	-0.305406	0.273884	-1.11509	0.264811	0.57827
rna-NM_001081269.2	153.763	-0.546005	0.275724	-1.98026	0.0476741	0.19513
rna-NM_133783.2	112.543	0.130003	0.129425	1.00447	0.315154	0.633835
rna-XM_006525926.4	34.2169	3.89383	0.88895	4.38026	1.18536e-05	0.000253525
rna-NM_146253.5	98.2674	-0.295609	0.368154	-0.802948	0.422005	0.73647
rna-XR_003947992.2	25.3155	-0.635868	0.932215	-0.682105	0.495172	0.790517
rna-XM_030249493.1	139.809	0.103725	0.247122	0.419732	0.674681	0.889645
rna-XM_017312371.3	23.9954	-2.36729	0.888557	-2.66419	0.00771736	0.0506334
rna-XM_011240202.3	93.0551	0.197404	1.02884	0.19187	0.847844	0.95673
rna-XM_006511637.4	1227.69	-1.202	0.349752	-3.43671	0.000588821	0.006771
rna-NM_001163032.1	143.372	-0.170408	0.930353	-0.183165	0.854669	0.958895
rna-XM_011249825.4	22.3313	1.32211	1.25383	1.05445	0.291676	0.608329
rna-XR_003948574.2	93.255	-2.12128	0.927266	-2.28767	0.0221567	0.11237
rna-XM_030249770.1	43.056	-1.85721	1.39141	-1.33477	0.181952	0.460717
rna-NM_021550.3	104.423	0.0518372	0.423691	0.122347	0.902624	0.970647
rna-XM_030252868.1	73.03	-0.570074	1.1405	-0.499844	0.617185	0.864286
rna-XM_036161235.1	122.518	-1.40839	0.949058	-1.48398	0.137813	0.389515
rna-XM_006517998.2	328.43	-0.21727	0.43175	-0.503232	0.614801	0.863243
rna-NM_001163741.2	13.086	-1.25066	1.6086	-0.777483	0.436874	0.748345
rna-XM_036159369.1	18.6416	0.111424	0.856976	0.13002	0.896551	0.968948
rna-XM_006539936.4	43.209	1.31434	2.35119	0.55901	0.576155	0.843425
rna-XM_006510697.5	48.0227	-1.64513	0.892526	-1.84323	0.0652957	0.241144
rna-NM_001003918.2	300.818	0.150335	0.264551	0.568265	0.569855	0.838544
rna-NM_009461.2	178.261	-0.469448	0.274176	-1.71221	0.0868578	0.290242
rna-XM_006527698.4	295.123	-0.699794	1.64601	-0.425145	0.670731	0.887987
rna-NR_015349.3	321.402	-0.594859	1.08067	-0.550453	0.582009	0.845905
rna-XM_017320114.2	45.7793	3.94549	1.30115	3.0323	0.00242695	0.0208096
rna-XM_006527357.5	27.7744	-2.88375	2.0913	-1.37893	0.167916	0.440593
gene-Gm12906	37.2502	-0.17976	0.24878	-0.722565	0.469947	0.770844
rna-NM_009196.4	1754.9	-1.77372	0.288784	-6.14204	8.14691e-10	4.36531e-08
rna-NM_028056.2	35.3991	-0.122274	0.423861	-0.288478	0.772981	0.927826
rna-XM_006535399.5	66.5066	1.07208	0.435475	2.46185	0.0138221	0.0789667
rna-XM_006504689.4	28.5698	-1.32035	1.3211	-0.999432	0.317585	0.635962
rna-NM_145959.3	145.104	-0.450142	0.705328	-0.638202	0.523342	0.809578
gene-Gm9067	442.791	0.452233	0.389543	1.16093	0.24567	0.553256
rna-NM_025636.5	160.016	-4.38973	0.967242	-4.5384	5.66819e-06	0.000132759
rna-XM_036152454.1	16.0176	-0.53876	0.604319	-0.891515	0.372653	0.690776
rna-XR_004936933.1	33.9138	-8.5002	1.25141	-6.79248	1.10218e-11	7.71311e-10
rna-XM_006517978.4	278.445	-0.0325297	0.238189	-0.136571	0.89137	0.967731
rna-NM_001177427.1	139.323	-0.0823149	0.162903	-0.505299	0.613349	0.862458
rna-XM_006532451.2	16.7892	0.074144	0.559425	0.132536	0.89456	0.96817
rna-NM_001362374.1	152.021	-0.652303	0.492963	-1.32323	0.185759	0.467209
gene-Gm6344	89.2243	0.667569	0.235649	2.83289	0.00461289	0.0345141
gene-Gm6341	199.202	0.496873	0.192993	2.57457	0.0100366	0.0616946
rna-XM_036160129.1	226.447	0.562407	0.354099	1.58828	0.112224	0.342617
rna-XM_036163153.1	86.7058	0.14744	2.07761	0.0709663	0.943425	0.983007
rna-XM_036162294.1	97.7855	-0.877914	0.977816	-0.897832	0.369275	0.687282
rna-XM_017313402.3	10.3734	0.405376	0.476668	0.850437	0.395082	0.71005
rna-XM_011245456.4	23.401	-1.37829	0.781698	-1.7632	0.077867	0.270436
rna-XM_006499265.4	191.888	0.114725	0.260959	0.439627	0.660207	0.884776
rna-NM_001357869.1	62.9421	-0.599205	1.05177	-0.569711	0.568874	0.837881
rna-NM_177790.4	146.564	1.0236	1.031	0.992821	0.320797	0.640168
rna-NM_133670.2	280.951	0.0540231	0.266931	0.202386	0.839615	0.954213
rna-NM_001308091.1	123.227	0.313386	0.279508	1.1212	0.262201	0.574968
rna-NM_007570.2	634.209	0.943324	0.38715	2.43658	0.0148267	0.0830476
rna-XM_006509848.5	40.0525	-0.169183	0.356047	-0.475169	0.634666	0.872869
rna-NM_011591.5	191.754	-0.25657	0.854758	-0.300167	0.76405	0.925352
rna-NM_001001160.3	96.5813	-0.410593	0.421619	-0.973849	0.330132	0.64967
rna-XR_004938035.1	61.7718	-1.35715	2.48479	-0.546183	0.58494	0.847069
gene-Gm6467	239.943	0.9691	0.196861	4.92277	8.53279e-07	2.46322e-05
rna-XM_036165322.1	257.681	-0.114689	0.707943	-0.162003	0.871304	0.963549
rna-NM_001190258.1	2772.26	0.264213	0.150498	1.75559	0.0791589	0.273616
rna-NM_172527.3	14.1589	-0.0808249	0.495866	-0.162997	0.870521	0.963549
rna-NM_001356311.1	44.2788	-0.734143	0.504881	-1.45409	0.145921	0.403323
rna-NM_001082484.2	69.0351	-1.14507	0.928703	-1.23298	0.217585	0.515232
rna-NM_001290995.1	1436.52	-0.350073	0.336534	-1.04023	0.298233	0.615377
rna-XR_001781521.2	579.307	-0.462438	0.391004	-1.1827	0.23693	0.540831
rna-NM_144731.4	119.073	-0.914129	0.350074	-2.61125	0.00902126	0.057045
rna-XM_036163964.1	135.264	0.588571	0.649562	0.906105	0.364881	0.683453
gene-Mrps36-ps1	83.381	-0.370194	0.167493	-2.21021	0.0270906	0.129646
gene-Mrps36-ps2	26.0523	-0.0647994	0.349895	-0.185197	0.853075	0.958172
gene-Gm7285	414.483	0.422584	0.170857	2.47332	0.0133864	0.0769423
rna-XM_006498079.4	237.798	-0.654345	0.420435	-1.55635	0.119625	0.357493
rna-NM_001374709.1	546.497	0.849965	1.38825	0.612255	0.540369	0.818653
gene-Selenok-ps4	14.4742	0.531181	0.330797	1.60576	0.108327	0.335073
gene-Selenok-ps6	10.2611	0.669717	0.566495	1.18221	0.237122	0.541141
gene-Selenok-ps8	16.2052	0.368698	0.341444	1.07982	0.280222	0.594723
rna-NM_001110152.2	175.821	0.114798	0.178622	0.642688	0.520427	0.807431
rna-NR_163738.1	57.9643	3.23407	1.60132	2.01963	0.0434218	0.182437
rna-XM_006504146.5	159.751	-0.801973	0.23351	-3.43443	0.000593808	0.00680364
rna-XR_003955567.2	114.406	-0.452895	0.851594	-0.53182	0.594851	0.851318
rna-XR_001784176.2	401.522	-0.0892379	0.153403	-0.581723	0.560753	0.831859
rna-NM_133835.2	21.5196	-1.52194	0.637681	-2.38668	0.0170015	0.0919369
gene-Gm10698	249.01	0.382442	0.223055	1.71456	0.0864254	0.289286
rna-XM_036164501.1	43.7775	-1.27872	0.885506	-1.44406	0.148723	0.407746
rna-NM_172763.3	82.8024	-1.25487	0.974039	-1.28832	0.197636	0.486188
rna-XM_006501307.3	12.657	0.555817	1.5993	0.347538	0.728187	0.91246
gene-Rpl31-ps9	363.378	0.296079	0.147462	2.00784	0.0446605	0.185733
rna-NM_008043.3	123.794	0.163706	0.383566	0.426799	0.669525	0.887605
rna-NR_003270.2	79.6053	1.67942	0.707412	2.37403	0.0175952	0.0944453
rna-NM_001360790.1	46.1529	-0.249836	0.346848	-0.720305	0.471337	0.771964
gene-Rpl31-ps13	285.764	0.335755	0.149279	2.24918	0.0245011	0.121008
rna-NR_073559.1	38.2553	-0.399543	0.294038	-1.35881	0.174206	0.450364
rna-XM_011243420.2	579.807	-0.177889	0.215413	-0.825804	0.408915	0.723586
rna-NM_026473.2	486.683	4.1305	0.381433	10.8289	2.51145e-27	8.33748e-25
rna-NM_001164581.1	65.251	-0.920371	0.271377	-3.39148	0.000695165	0.00770941
gene-Gm28530	202.577	0.354671	0.173895	2.03957	0.0413935	0.176176
rna-NM_001139503.1	122.776	-1.14582	0.439529	-2.60692	0.00913608	0.057604
rna-XM_006503610.4	118.518	-0.832314	0.243282	-3.42119	0.000623488	0.00705803
rna-NM_025379.2	873.536	0.385587	0.159482	2.41775	0.015617	0.086471
rna-XM_017321295.2	1064.8	0.277869	0.591852	0.469491	0.638719	0.87471
gene-Gm9027	41.5036	-0.588332	0.307089	-1.91584	0.055386	0.215765
rna-NM_001384267.1	69.8337	-0.401572	0.268131	-1.49767	0.134219	0.383336
rna-XM_036159094.1	76.5191	-0.0824779	0.315922	-0.261071	0.794038	0.934851
rna-XM_006500266.5	159.035	-0.415515	2.08866	-0.198938	0.842311	0.955004
rna-NM_025877.4	444.042	-0.0544008	0.15981	-0.34041	0.733547	0.914882
rna-XM_036152915.1	37.1918	-0.377231	0.295185	-1.27795	0.201268	0.492085
rna-XM_011245529.3	737.072	1.83204	0.173823	10.5397	5.67053e-26	1.73189e-23
rna-XR_004942257.1	32.3543	0.611554	0.313334	1.95176	0.0509665	0.203853
rna-NM_008120.3	108.466	0.0432674	0.405238	0.10677	0.914971	0.974374
rna-NM_010865.3	16.3243	-7.44681	1.42053	-5.24228	1.58601e-07	5.33644e-06
gene-Gm7324	99.3778	0.703082	0.164821	4.26573	1.99251e-05	0.000390599
rna-NM_025993.3	124.777	-1.29152	0.976884	-1.32208	0.186143	0.467589
rna-NM_001364973.1	429.535	0.921394	0.385469	2.39032	0.0168336	0.0912038
rna-NM_013859.2	145.423	-0.0874971	0.223011	-0.392344	0.694804	0.898369
rna-NM_001033474.2	3230.98	-0.0490884	0.156949	-0.312768	0.754457	0.922074
rna-NM_053122.5	20.6898	0.680949	0.434709	1.56645	0.117244	0.352725
rna-NM_153391.2	28.2901	-2.872	1.51772	-1.89232	0.0584489	0.22364
rna-NM_021419.2	232.925	0.140359	0.204829	0.68525	0.493186	0.789385
rna-NM_146205.2	223.432	0.72033	0.17193	4.18966	2.79369e-05	0.000519007
rna-NM_178624.6	33.6385	-1.18194	1.35896	-0.869742	0.384441	0.700824
rna-XM_011246418.4	28.8961	-1.52814	0.832894	-1.83474	0.0665443	0.244337
gene-Rps16-ps2	3874.94	0.558797	0.15099	3.70088	0.000214855	0.0029559
rna-NM_198012.4	18.5751	-1.44658	0.940797	-1.53761	0.124145	0.365493
rna-NM_001356350.1	14.4856	-1.36331	1.09879	-1.24074	0.214703	0.511884
rna-XM_030253573.2	239.292	-0.864552	1.04098	-0.830517	0.406247	0.720785
rna-NM_023054.2	603.309	0.398127	0.134241	2.96577	0.00301928	0.024696
rna-NM_008388.2	655.655	0.25909	0.129788	1.99625	0.0459068	0.189534
gene-Gm4017	157.593	0.685343	0.268321	2.5542	0.0106434	0.064507
rna-XM_011243832.4	242.154	-0.652517	2.09364	-0.311667	0.755294	0.922137
rna-NM_011714.2	124.656	-10.3806	1.09982	-9.43846	3.78309e-21	7.31286e-19
rna-NM_001039710.1	154.429	0.952589	0.408825	2.33006	0.0198028	0.10307
rna-XM_006521058.5	90.3583	0.470246	0.399153	1.17811	0.238754	0.543293
rna-NR_164198.1	38.0299	0.348515	0.383527	0.908711	0.363503	0.682786
rna-NM_011945.3	454.369	-0.952852	0.342571	-2.78148	0.00541123	0.0389237
rna-NM_175448.4	51.1079	-0.56921	0.259272	-2.19541	0.028134	0.133014
rna-XR_001783733.1	241.351	0.832013	0.416352	1.99834	0.0456797	0.18884
rna-NM_026065.4	171.511	-0.219026	1.09025	-0.200895	0.840781	0.954827
rna-NM_025338.4	462.323	0.374217	0.231601	1.61579	0.10614	0.331108
rna-NM_001110197.1	168.303	-0.0859541	0.259309	-0.331474	0.740286	0.917773
rna-NM_030558.2	19.0799	0.570441	0.862836	0.661123	0.508533	0.800351
rna-NM_001252438.1	86.7497	-0.389909	0.31466	-1.23915	0.215292	0.512425
rna-XR_385298.5	114.337	-0.1889	1.23166	-0.153371	0.878106	0.964501
rna-NM_001363021.1	81.2687	1.17411	1.38138	0.849959	0.395348	0.71011
rna-XM_006524697.2	39.9024	2.02235	0.826914	2.44566	0.0144587	0.0816563
rna-NM_138312.1	125.53	-1.196	2.0187	-0.592458	0.553544	0.827317
rna-XR_003955655.2	42.5747	-1.13481	1.80889	-0.627353	0.530428	0.813829
rna-NR_030711.1	201.526	1.86982	0.456134	4.09928	4.1444e-05	0.000718379
rna-XM_036165512.1	54.9225	-1.04881	0.449573	-2.3329	0.0196534	0.102399
rna-NM_001357068.1	467.788	0.286637	0.66326	0.432163	0.665623	0.886742
rna-NM_001199270.1	26.7443	0.517713	0.473587	1.09317	0.274318	0.58848
rna-NM_028730.6	62.7244	0.236788	0.735421	0.321976	0.747471	0.919627
gene-Gm6063	318.62	0.511717	0.204582	2.50128	0.0123745	0.0724861
gene-Gm6061	1097.2	0.669797	0.176782	3.78882	0.000151365	0.00220352
gene-Gm6065	57.9469	0.550222	0.180017	3.0565	0.0022394	0.0195194
rna-XM_011249385.4	277.731	4.17328	0.428674	9.73531	2.13173e-22	4.71792e-20
rna-XR_003946831.2	87.5398	-2.16896	2.4157	-0.897859	0.369261	0.687282
rna-NM_172609.3	432.801	-0.0140341	0.181391	-0.0773691	0.93833	0.981051
rna-NM_172479.3	374.347	-3.56857	0.58367	-6.11402	9.71534e-10	5.16944e-08
gene-Gm15725	5433.46	0.397147	0.170238	2.33289	0.0196538	0.102399
rna-XM_006515630.4	136.62	-3.35984	1.2247	-2.74341	0.00608054	0.0425359
rna-XM_036162134.1	198.262	0.39983	0.178511	2.2398	0.0251036	0.123004
rna-NM_026432.4	2390.38	0.30678	0.132835	2.30949	0.0209166	0.107367
rna-XM_006506084.4	92.5521	-1.34017	0.505326	-2.65209	0.0079996	0.0519616
rna-XM_036163270.1	33.6029	-1.34892	1.07715	-1.25231	0.210456	0.505352
rna-NM_024182.4	135.205	0.418588	1.2855	0.325624	0.744709	0.918689
rna-NM_175668.4	607.824	0.645504	0.245028	2.63441	0.00842826	0.0540413
rna-XM_036161416.1	21.3525	-0.802059	0.389795	-2.05764	0.0396244	0.170934
rna-NM_008207.3	82.4029	-0.338811	0.507812	-0.667197	0.504646	0.797439
rna-NM_001327998.1	209.433	-0.0861119	0.238779	-0.360634	0.718373	0.908256
rna-NM_001110242.1	270.755	-0.0318034	0.231928	-0.137126	0.890931	0.967668
rna-NR_028264.1	39.6997	-1.21652	0.312551	-3.89221	9.93337e-05	0.00152854
rna-NM_009753.4	73.2144	-0.528928	0.388774	-1.3605	0.173671	0.449863
rna-XR_003950428.2	29.5495	-0.472608	1.88094	-0.251261	0.801612	0.937896
rna-NR_168893.1	83.9767	-1.41128	0.644874	-2.18846	0.0286364	0.134556
gene-Rpl36a-ps2	1559.36	0.290429	0.125344	2.31705	0.0205008	0.105802
gene-Rpl36a-ps1	1063.36	0.366721	0.120092	3.05368	0.00226057	0.0196589
rna-NR_027852.1	65.329	-0.0633927	0.789283	-0.0803168	0.935985	0.979975
rna-NM_145456.3	729.825	-0.573965	0.219481	-2.61511	0.00891999	0.0564748
rna-NM_009174.3	124.57	1.12903	0.343991	3.28213	0.00103025	0.0104468
rna-NM_001166409.2	460.879	2.37149	0.425607	5.57201	2.51819e-08	1.02548e-06
rna-NM_172490.4	61.1098	-0.393687	0.269086	-1.46305	0.143453	0.398377
rna-NM_144522.5	373.34	-0.175084	0.12604	-1.38912	0.164797	0.435404
rna-XR_377502.4	33.1884	-0.434544	0.88076	-0.493374	0.621748	0.866645
rna-XM_006523641.5	40.5291	0.0328965	2.41511	0.0136212	0.989132	0.997164
rna-NM_198306.3	99.0228	-0.87567	1.70264	-0.514302	0.607041	0.859639
rna-NM_009256.3	123.807	0.344788	1.06494	0.323764	0.746116	0.918866
rna-NM_021887.2	193.129	-0.716644	1.03763	-0.690658	0.48978	0.787351
rna-NM_183160.3	2317.51	3.13141	0.275742	11.3563	6.90015e-30	2.8479e-27
rna-XM_030254916.2	257.5	0.569739	0.388397	1.4669	0.142404	0.396496
rna-NM_001163425.1	767.886	-0.306325	0.455984	-0.671789	0.501718	0.795694
rna-XM_011240888.4	63.2216	0.0107539	0.693374	0.0155095	0.987626	0.996653
rna-NM_001081166.2	22.8693	-0.709233	1.28076	-0.553762	0.579742	0.845271
rna-NR_103516.1	97.0306	-3.47752	2.28719	-1.52043	0.128402	0.372994
rna-NM_001162908.1	141.026	4.47247	1.19897	3.73027	0.000191271	0.0026746
rna-NM_009569.4	237.325	-0.248937	0.829383	-0.300147	0.764065	0.925352
rna-XM_006520683.5	86.536	-0.217372	0.437463	-0.496893	0.619265	0.865697
rna-NM_008214.4	255.819	0.585317	0.142021	4.12135	3.76655e-05	0.000664925
rna-NM_025919.3	365.112	0.301954	0.115979	2.60353	0.00922703	0.0580099
rna-NM_008720.2	595.174	-0.606409	0.22015	-2.75453	0.00587765	0.0414585
rna-NM_001003934.2	1944.91	-0.200711	0.105421	-1.90391	0.0569224	0.21976
rna-NM_001285933.1	45.9761	-3.25953	1.2147	-2.6834	0.00728781	0.048471
rna-XM_006530730.3	33.4655	-0.573096	0.407544	-1.40622	0.15966	0.427021
rna-XR_380076.5	29.9493	-0.270015	0.928482	-0.290813	0.771194	0.927546
rna-NM_001164075.1	135.312	3.35421	2.28012	1.47107	0.141273	0.394835
rna-XM_030247779.2	47.3091	-3.59512	1.66441	-2.16	0.0307728	0.142263
gene-Gm14303	13678.8	0.129777	0.155104	0.83671	0.402755	0.717341
rna-NM_001361413.1	138.725	-0.70285	0.319437	-2.20028	0.0277874	0.13207
rna-NM_008681.2	3062.37	0.153402	0.271143	0.56576	0.571557	0.840105
rna-NM_001357395.1	145.568	0.649488	0.94455	0.687617	0.491694	0.788322
rna-XM_006519982.2	10.4376	-0.779532	1.61811	-0.481754	0.629981	0.871732
rna-XM_036162237.1	151.861	-0.308365	0.271996	-1.13371	0.256916	0.56811
rna-NM_001288613.1	226.95	0.244912	0.28852	0.848858	0.39596	0.710679
rna-XM_030255274.2	38.4962	1.24224	1.105	1.1242	0.260928	0.573787
rna-NM_178379.3	129.501	0.567612	0.272366	2.084	0.03716	0.163301
rna-XM_006538159.4	89.8918	0.0112736	0.336029	0.0335495	0.973236	0.992142
rna-NM_001374606.1	51.0813	-1.08847	0.415408	-2.62024	0.00878667	0.0557463
gene-Gm12799	58.2965	-0.0890274	0.280512	-0.317375	0.750959	0.920821
gene-Gm12791	87.4559	0.11528	0.455632	0.253011	0.800259	0.937602
rna-NM_133756.5	102.158	-0.0430194	0.327345	-0.131419	0.895444	0.968578
rna-XM_017316943.2	29.1945	-4.33872	1.16809	-3.71438	0.000203704	0.0028254
rna-NM_172767.3	383.424	-0.436688	0.491852	-0.887845	0.374624	0.692685
rna-XM_006505623.1	568.279	0.410156	0.476016	0.861644	0.388884	0.704716
gene-Gm10108	291.529	0.692466	0.135791	5.09951	3.40525e-07	1.06343e-05
rna-NM_001289701.1	238.461	0.379041	0.546599	0.693453	0.488025	0.786074
rna-NM_023175.1	71.414	-0.573368	0.207718	-2.76032	0.00577445	0.0409386
rna-NM_001347244.1	102.68	-0.240295	0.242767	-0.989815	0.322264	0.641713
rna-NM_001355458.1	10.5114	-0.0651057	2.10749	-0.0308926	0.975355	0.992962
rna-NM_019564.3	301.713	-0.232687	0.174876	-1.33059	0.183325	0.462951
[truncated: 13,272 more rows]

## Sheet: DE Transcripts
Transcript/Gene ID	Annotation	ENSEMBL ID (if available)	baseMean	Log2BM	log2FoldChange	lfcSE	stat	pvalue	padj
NM_009735.3	beta-2 microglobulin (B2m), mRNA	ENSMUSG00000060802	41121.7	15.3276	1.61159	0.261478	6.16337	7.12144e-10	3.84281e-08
NM_009987.4	chemokine (C-X3-C motif) receptor 1 (Cx3cr1), mRNA	ENSMUSG00000052336	18544.1	14.1787	-1.80177	0.554705	-3.24816	0.00116155	0.011466
NM_010907.2	nuclear factor of kappa light polypeptide gene enhancer in B cells inhibitor, alpha (Nfkbia), mRNA	ENSMUSG00000021025	16303.5	13.9929	1.56633	0.407967	3.83934	0.000123364	0.00185113
NM_019639.4	ubiquitin C (Ubc), mRNA	ENSMUSG00000008348	14828.4	13.8561	1.13964	0.295135	3.86141	0.000112735	0.00170792
NM_025378.2	interferon induced transmembrane protein 3 (Ifitm3), mRNA	ENSMUSG00000025492	11730.4	13.518	1.9822	0.225608	8.78606	1.54895e-18	2.31903e-16
NM_010380.3	histocompatibility 2, D region locus 1 (H2-D1), mRNA	ENSMUSG00000073411	11214.9	13.4531	1.77013	0.350121	5.05578	4.28641e-07	1.31706e-05
NM_011595.2	tissue inhibitor of metalloproteinase 3 (Timp3), mRNA	ENSMUSG00000020044	9315.01	13.1853	1.99798	0.199656	10.0071	1.41854e-23	3.38477e-21
NM_013602.3	metallothionein 1 (Mt1), mRNA	ENSMUSG00000031765	8766.24	13.0977	3.2682	0.80423	4.06376	4.82887e-05	0.000815727
NM_008630.2	metallothionein 2 (Mt2), mRNA	ENSMUSG00000031762	7118.05	12.7973	3.14838	0.401534	7.84088	4.47408e-15	4.88027e-13
Gm12715	pseudogene		6992.18	12.7715	1.22618	0.155288	7.8962	2.87544e-15	3.22874e-13
NM_001109914.1	apolipoprotein L domain containing 1 (Apold1), mRNA	ENSMUSG00000090698	6935.2	12.7597	4.80697	0.613358	7.83713	4.60959e-15	4.99242e-13
NM_010740.3	CD93 antigen (Cd93), mRNA	ENSMUSG00000027435	5941.5	12.5366	2.03229	0.168657	12.0498	1.94362e-33	1.23671e-30
NM_031185.3	A kinase (PRKA) anchor protein (gravin) 12 (Akap12), mRNA	ENSMUSG00000038587	5577.95	12.4455	3.58993	0.230415	15.5803	9.91235e-55	1.08123e-51
XM_036165089.1	PREDICTED: transmembrane protein 119 (Tmem119), transcript variant X1, mRNA	ENSMUSG00000054675	5382.71	12.3941	-1.2085	0.404756	-2.98575	0.00282886	0.023427
NM_133662.2	immediate early response 3 (Ier3), mRNA	ENSMUSG00000003541	4667.24	12.1884	4.17307	0.76413	5.4612	4.72917e-08	1.7965e-06
NM_178598.2	transgelin 2 (Tagln2), mRNA	ENSMUSG00000026547	4660.38	12.1862	1.89726	0.242627	7.81968	5.29583e-15	5.69526e-13
NM_008409.2	integral membrane protein 2A (Itm2a), mRNA	ENSMUSG00000031239	4617.09	12.1728	-2.94757	0.305175	-9.65863	4.5188e-22	9.32521e-20
NM_007901.5	sphingosine-1-phosphate receptor 1 (S1pr1), mRNA	ENSMUSG00000045092	4609.8	12.1705	1.41385	0.280777	5.03549	4.76631e-07	1.44417e-05
NM_001001491.2	tropomyosin 4 (Tpm4), mRNA	ENSMUSG00000031799	4361.63	12.0907	1.44233	0.187662	7.68581	1.52035e-14	1.54781e-12
NM_011508.2	eukaryotic translation initiation factor 1 (Eif1), mRNA	ENSMUSG00000035530	4343.42	12.0846	1.35979	0.326504	4.1647	3.11763e-05	0.000572228
XM_006514347.5	PREDICTED: sparc/osteonectin, cwcv and kazal-like domains proteoglycan 2 (Spock2), transcript variant X1, mRNA	ENSMUSG00000058297	4308.8	12.0731	-2.20777	0.301204	-7.32982	2.30463e-13	1.99966e-11
NM_011803.2	Kruppel-like factor 6 (Klf6), mRNA	ENSMUSG00000000078	4245.91	12.0519	2.17797	0.415467	5.24223	1.5865e-07	5.33644e-06
NM_013885.2	chloride intracellular channel 4 (mitochondrial) (Clic4), mRNA	ENSMUSG00000037242	4198.08	12.0355	1.0709	0.172115	6.22199	4.90902e-10	2.70634e-08
NM_007687.5	cofilin 1, non-muscle (Cfl1), mRNA	ENSMUSG00000056201	4126.34	12.0106	1.04412	0.250004	4.17639	2.96166e-05	0.000545944
NM_007796.2	cytotoxic T lymphocyte-associated protein 2 alpha (Ctla2a), transcript variant 1, mRNA	ENSMUSG00000044258	4083.77	11.9957	3.46146	0.30806	11.2363	2.70459e-29	1.03254e-26
NM_011701.4	vimentin (Vim), mRNA	ENSMUSG00000026728	4072	11.9915	1.38772	0.212434	6.53247	6.46942e-11	3.98365e-09
NM_001359014.1	SPARC-like 1 (Sparcl1), transcript variant 1, mRNA	ENSMUSG00000029309	3294.69	11.6859	-1.36741	0.0851212	-16.0643	4.54145e-58	5.77937e-55
XM_006510796.3	PREDICTED: annexin A2 (Anxa2), transcript variant X1, mRNA	ENSMUSG00000032231	3191.5	11.64	2.47988	0.269379	9.20591	3.38774e-20	5.94645e-18
NM_010833.2	moesin (Msn), mRNA	ENSMUSG00000031207	3106.2	11.6009	1.2561	0.251098	5.00242	5.66151e-07	1.68532e-05
NM_001252055.1	lymphocyte antigen 6 complex, locus C1 (Ly6c1), transcript variant 2, mRNA	ENSMUSG00000079018	3042.54	11.5711	-8.0057	2.36787	-3.38098	0.000722289	0.0079239
NM_009285.3	stanniocalcin 1 (Stc1), mRNA	ENSMUSG00000014813	3026.21	11.5633	6.43112	0.316208	20.3383	5.89567e-92	3.00109e-88
XM_006523676.5	PREDICTED: histocompatibility 2, K1, K region (H2-K1), transcript variant X5, mRNA	ENSMUSG00000061232	2794.57	11.4484	2.11273	0.68338	3.0916	0.00199084	0.017765
NM_010496.3	inhibitor of DNA binding 2 (Id2), mRNA	ENSMUSG00000020644	2783.12	11.4425	1.32799	0.437574	3.0349	0.00240615	0.0206428
NM_011018.3	sequestosome 1 (Sqstm1), transcript variant 1, mRNA	ENSMUSG00000015837	2681.99	11.3891	1.20486	0.277207	4.34642	1.38379e-05	0.00028518
NM_177715.4	potassium channel tetramerisation domain containing 12 (Kctd12), mRNA	ENSMUSG00000098557	2658.4	11.3763	-1.15196	0.248165	-4.64192	3.45179e-06	8.51572e-05
NM_009621.5	a disintegrin-like and metallopeptidase (reprolysin type) with thrombospondin type 1 motif, 1 (Adamts1), mRNA	ENSMUSG00000022893	2588.92	11.3381	4.67871	0.314258	14.8881	3.9359e-50	3.75657e-47
NM_001357008.1	purinergic receptor P2Y, G-protein coupled 12 (P2ry12), transcript variant 3, mRNA	ENSMUSG00000036353	2506.03	11.2912	-2.58122	0.828537	-3.11539	0.00183701	0.016748
NM_011076.3	ATP-binding cassette, sub-family B (MDR/TAP), member 1A (Abcb1a), mRNA	ENSMUSG00000040584	2483.46	11.2781	-1.45339	0.350103	-4.15132	3.3057e-05	0.000597824
NM_018738.4	interferon gamma induced GTPase (Igtp), mRNA	ENSMUSG00000078853	2365.02	11.2076	3.5973	0.212357	16.9398	2.2874e-64	4.99013e-61
NM_001111099.2	cyclin-dependent kinase inhibitor 1A (P21) (Cdkn1a), transcript variant 2, mRNA	ENSMUSG00000023067	2336.84	11.1903	2.57736	0.799512	3.22367	0.00126558	0.0122807
NM_183160.3	transmembrane protein 252 (Tmem252), mRNA	ENSMUSG00000048572	2317.51	11.1784	3.13141	0.275742	11.3563	6.90015e-30	2.8479e-27
NM_001012477.2	chemokine (C-X-C motif) ligand 12 (Cxcl12), transcript variant 3, mRNA	ENSMUSG00000061353	2242.49	11.1309	-5.13314	0.456379	-11.2475	2.38186e-29	9.3265e-27
NM_021881.2	quaking (Qk), transcript variant 3, mRNA	ENSMUSG00000062078	2189.44	11.0963	-1.35153	0.409041	-3.30415	0.000952661	0.0098033
NM_001166589.1	eukaryotic translation initiation factor 5A (Eif5a), transcript variant 1, mRNA	ENSMUSG00000078812	2182.87	11.092	1.02929	0.265973	3.86992	0.000108873	0.00165433
XM_036166207.1	PREDICTED: solute carrier organic anion transporter family, member 1a4 (Slco1a4), transcript variant X7, mRNA	ENSMUSG00000030237	2153.19	11.0723	-2.70868	0.535674	-5.05658	4.26831e-07	1.31414e-05
NM_025359.3	tetraspanin 13 (Tspan13), mRNA	ENSMUSG00000020577	1975.55	10.948	-1.0494	0.195864	-5.3578	8.42405e-08	2.99869e-06
NM_028808.3	purinergic receptor P2Y, G-protein coupled 13 (P2ry13), mRNA	ENSMUSG00000036362	1934.36	10.9176	-1.99755	0.611516	-3.26655	0.00108867	0.0108874
NM_011189.1	proteasome (prosome, macropain) activator subunit 1 (PA28 alpha) (Psme1), mRNA	ENSMUSG00000022216	1854.82	10.8571	1.60156	0.178392	8.97776	2.76327e-19	4.48913e-17
NM_028044.2	calponin 3, acidic (Cnn3), mRNA	ENSMUSG00000053931	1823.2	10.8323	1.47979	0.221699	6.67475	2.47648e-11	1.64427e-09
NM_013642.3	dual specificity phosphatase 1 (Dusp1), mRNA	ENSMUSG00000024190	1819.25	10.8291	2.88049	0.333998	8.62427	6.45041e-18	9.206e-16
Gm3788	pseudogene		1800.51	10.8142	1.1737	0.193537	6.06446	1.324e-09	6.87715e-08
NM_007426.4	angiopoietin 2 (Angpt2), mRNA	ENSMUSG00000031465	1797.51	10.8118	5.21968	0.191716	27.2261	3.18814e-163	4.86861e-159
NM_010378.3	histocompatibility 2, class II antigen A, alpha (H2-Aa), mRNA	ENSMUSG00000036594	1785.3	10.8019	1.98602	0.27768	7.15218	8.541e-13	6.72318e-11
XM_036155570.1	PREDICTED: CD63 antigen (Cd63), transcript variant X3, mRNA	ENSMUSG00000025351	1769.63	10.7892	1.4737	0.332049	4.43819	9.07166e-06	0.000200644
NM_009841.4	CD14 antigen (Cd14), mRNA	ENSMUSG00000051439	1761.99	10.783	2.44685	0.317161	7.71483	1.21141e-14	1.24158e-12
NM_009196.4	solute carrier family 16 (monocarboxylic acid transporters), member 1 (Slc16a1), mRNA	ENSMUSG00000032902	1754.9	10.7772	-1.77372	0.288784	-6.14204	8.14691e-10	4.36531e-08
XM_030242376.1	PREDICTED: uncoupling protein 2 (mitochondrial, proton carrier) (Ucp2), transcript variant X1, mRNA	ENSMUSG00000033685	1727.78	10.7547	2.18281	0.321381	6.79197	1.10613e-11	7.71311e-10
NM_001360525.1	fermitin family member 2 (Fermt2), transcript variant 1, mRNA	ENSMUSG00000037712	1690.05	10.7229	1.23216	0.122264	10.0779	6.92193e-24	1.67785e-21
XM_006540642.5	PREDICTED: insulin-like growth factor I receptor (Igf1r), transcript variant X2, mRNA	ENSMUSG00000005533	1688.56	10.7216	-1.52881	0.482734	-3.16697	0.00154035	0.0144577
XM_006502369.3	PREDICTED: Fc receptor-like S, scavenger receptor (Fcrls), transcript variant X1, mRNA	ENSMUSG00000015852	1683.68	10.7174	-5.924	0.872093	-6.79285	1.09936e-11	7.71311e-10
NM_008945.3	proteasome (prosome, macropain) subunit, beta type 4 (Psmb4), mRNA	ENSMUSG00000005779	1678.71	10.7131	1.03125	0.121991	8.45345	2.82827e-17	3.62945e-15
NM_011331.3	chemokine (C-C motif) ligand 12 (Ccl12), mRNA	ENSMUSG00000035352	1677.67	10.7122	3.87109	0.687112	5.63385	1.76228e-08	7.3731e-07
NM_010591.2	jun proto-oncogene (Jun), mRNA	ENSMUSG00000052684	1643.18	10.6823	1.53874	0.333414	4.61509	3.92917e-06	9.509e-05
NM_009415.3	triosephosphate isomerase 1 (Tpi1), mRNA	ENSMUSG00000023456	1617.07	10.6592	1.17304	0.137475	8.53277	1.42886e-17	1.93099e-15
XM_036156429.1	PREDICTED: lectin, galactoside-binding, soluble, 3 binding protein (Lgals3bp), transcript variant X1, mRNA	ENSMUSG00000033880	1610.81	10.6536	2.08039	0.159464	13.0462	6.68347e-39	4.86016e-36
NM_001025577.2	avian musculoaponeurotic fibrosarcoma oncogene homolog (Maf), mRNA	ENSMUSG00000055435	1591.74	10.6364	-2.42507	0.367206	-6.60412	3.99892e-11	2.54448e-09
NM_009932.4	collagen, type IV, alpha 2 (Col4a2), mRNA	ENSMUSG00000031503	1572.03	10.6184	2.25248	0.200738	11.221	3.21692e-29	1.19818e-26
NM_010240.2	ferritin light polypeptide 1 (Ftl1), mRNA	ENSMUSG00000050708	1567.9	10.6146	1.24857	0.127834	9.76716	1.55759e-22	3.49793e-20
NM_010708.2	lectin, galactose binding, soluble 9 (Lgals9), transcript variant 1, mRNA	ENSMUSG00000001123	1559.54	10.6069	1.31267	0.234422	5.59963	2.14808e-08	8.84186e-07
NM_028544.1	Ras interacting protein 1 (Rasip1), mRNA	ENSMUSG00000044562	1557.76	10.6053	1.41287	0.244676	5.77446	7.71998e-09	3.43708e-07
NM_010382.2	histocompatibility 2, class II antigen E beta (H2-Eb1), mRNA	ENSMUSG00000060586	1524.54	10.5742	1.7474	0.23033	7.58654	3.28572e-14	3.19594e-12
NM_001355053.1	BCL2-like 1 (Bcl2l1), transcript variant 5, mRNA	ENSMUSG00000007659	1513.8	10.564	1.1383	0.267325	4.25813	2.06143e-05	0.000402454
NM_009439.1	proteasome (prosome, macropain) 26S subunit, non-ATPase, 3 (Psmd3), mRNA	ENSMUSG00000017221	1511.46	10.5617	1.02972	0.241022	4.27232	1.93453e-05	0.00038119
NM_207105.3	histocompatibility 2, class II antigen A, beta 1 (H2-Ab1), mRNA	ENSMUSG00000073421	1509.38	10.5597	2.20239	0.320027	6.8819	5.90595e-12	4.25251e-10
NM_010415.2	heparin-binding EGF-like growth factor (Hbegf), mRNA	ENSMUSG00000024486	1505.99	10.5565	3.24361	0.28494	11.3835	5.05338e-30	2.14362e-27
NM_010798.3	macrophage migration inhibitory factor (glycosylation-inhibiting factor) (Mif), mRNA	ENSMUSG00000033307	1451.75	10.5036	1.5183	0.103115	14.7243	4.50375e-49	4.04569e-46
NM_011809.3	E26 avian leukemia oncogene 2, 3' domain (Ets2), mRNA	ENSMUSG00000022895	1439.67	10.4915	1.09398	0.277115	3.94773	7.88959e-05	0.00126027
NM_001164314.1	tryptophanyl-tRNA synthetase (Wars), transcript variant 2, mRNA	ENSMUSG00000021266	1436.31	10.4882	3.01878	0.179882	16.782	3.30482e-63	5.60754e-60
NM_019980.2	LPS-induced TN factor (Litaf), mRNA	ENSMUSG00000022500	1436.1	10.4879	3.13639	0.644098	4.86943	1.1192e-06	3.15558e-05
Gm9844	pseudogene		1430.78	10.4826	1.15201	0.194039	5.93698	2.90328e-09	1.37689e-07
NM_007793.3	cystatin B (Cstb), mRNA	ENSMUSG00000005054	1404.68	10.456	1.60476	0.288467	5.56307	2.65075e-08	1.07373e-06
NM_010724.2	proteasome (prosome, macropain) subunit, beta type 8 (large multifunctional peptidase 7) (Psmb8), mRNA	ENSMUSG00000024338	1402.16	10.4534	1.81394	0.301884	6.00874	1.86973e-09	9.30056e-08
NM_026545.3	proteasome (prosome, macropain) 26S subunit, non-ATPase, 8 (Psmd8), mRNA	ENSMUSG00000030591	1389.13	10.44	1.38341	0.281277	4.91831	8.72961e-07	2.50583e-05
NM_009673.2	annexin A5 (Anxa5), mRNA	ENSMUSG00000027712	1376.17	10.4264	1.23312	0.301178	4.09433	4.23387e-05	0.000728922
NM_025557.1	Purkinje cell protein 4-like 1 (Pcp4l1), mRNA	ENSMUSG00000038370	1373.32	10.4235	-1.63355	0.215235	-7.5896	3.20901e-14	3.14133e-12
NM_153564.2	guanylate binding protein 5 (Gbp5), mRNA	ENSMUSG00000105504	1368.81	10.4187	2.90726	0.45319	6.4151	1.4073e-10	8.29764e-09
NM_008218.2	hemoglobin alpha, adult chain 1 (Hba-a1), mRNA	ENSMUSG00000069919	1363	10.4126	2.07531	0.690977	3.00345	0.0026694	0.0223489
NM_009448.4	tubulin, alpha 1C (Tuba1c), mRNA	ENSMUSG00000043091	1348.53	10.3972	3.55237	0.228853	15.5225	2.44357e-54	2.48771e-51
NM_009530.2	ATRX, chromatin remodeler (Atrx), mRNA	ENSMUSG00000031229	1328.41	10.3755	-1.09453	0.282614	-3.87289	0.00010755	0.00163912
NM_010260.1	guanylate binding protein 2 (Gbp2), mRNA	ENSMUSG00000028270	1311.55	10.3571	3.92216	0.375256	10.452	1.43522e-25	4.21487e-23
NM_011404.3	solute carrier family 7 (cationic amino acid transporter, y+ system), member 5 (Slc7a5), mRNA	ENSMUSG00000040010	1307.91	10.353	-1.19485	0.19409	-6.15617	7.45265e-10	4.00738e-08
NM_011032.3	prolyl 4-hydroxylase, beta polypeptide (P4hb), mRNA	ENSMUSG00000025130	1305.55	10.3504	1.0013	0.151145	6.62478	3.47775e-11	2.23146e-09
NM_007679.4	CCAAT/enhancer binding protein (C/EBP), delta (Cebpd), mRNA	ENSMUSG00000071637	1293.45	10.337	1.22634	0.36476	3.36205	0.000773665	0.00834689
NM_001083955.1	hemoglobin alpha, adult chain 2 (Hba-a2), mRNA	ENSMUSG00000069917	1258.43	10.2974	2.05667	0.700494	2.93603	0.00332441	0.0267195
NM_008416.3	jun B proto-oncogene (Junb), mRNA	ENSMUSG00000052837	1245.69	10.2827	2.0157	0.233887	8.61824	6.79897e-18	9.61362e-16
NM_001198823.1	amyloid beta (A4) precursor protein (App), transcript variant 1, mRNA	ENSMUSG00000022892	1244.98	10.2819	7.78841	2.14129	3.63725	0.000275566	0.00364976
XM_017319352.3	PREDICTED: EH-domain containing 4 (Ehd4), transcript variant X1, mRNA	ENSMUSG00000027293	1233.5	10.2685	1.09562	0.246871	4.43802	9.07899e-06	0.000200644
XM_006511637.4	PREDICTED: guanine nucleotide binding protein (G protein), alpha inhibiting 2 (Gnai2), transcript variant X1, mRNA	ENSMUSG00000032562	1227.69	10.2617	-1.202	0.349752	-3.43671	0.000588821	0.006771
NM_009775.4	translocator protein (Tspo), mRNA	ENSMUSG00000041736	1216.96	10.2491	1.79361	0.171782	10.4412	1.60762e-25	4.63206e-23
NM_011971.4	proteasome (prosome, macropain) subunit, beta type 3 (Psmb3), mRNA	ENSMUSG00000069744	1193.68	10.2212	1.05587	0.211357	4.99566	5.86353e-07	1.73531e-05
NM_011428.3	synaptosomal-associated protein 25 (Snap25), transcript variant 1, mRNA	ENSMUSG00000027273	1180.58	10.2053	-4.47505	1.25004	-3.57992	0.0003437	0.00433057
Eif1-ps2	family with sequence similarity 136, member B, pseudogene		1178.84	10.2032	1.70888	0.45349	3.76828	0.000164377	0.00235258
NM_001357117.1	Fc receptor, IgG, alpha chain transporter (Fcgrt), transcript variant 2, mRNA	ENSMUSG00000003420	1174.49	10.1978	-1.01127	0.185505	-5.45147	4.99552e-08	1.87436e-06
NM_173014.2	lysophosphatidylcholine acyltransferase 2 (Lpcat2), transcript variant 1, mRNA	ENSMUSG00000033192	1160.89	10.181	-2.4718	0.619049	-3.9929	6.52692e-05	0.00106261
NM_011660.3	thioredoxin 1 (Txn1), mRNA	ENSMUSG00000028367	1156.96	10.1761	1.05494	0.178878	5.8975	3.69043e-09	1.71296e-07
Mif-ps	pseudogene		1148.13	10.1651	1.48186	0.124154	11.9357	7.71468e-33	4.53119e-30
NM_021384.4	radical S-adenosyl methionine domain containing 2 (Rsad2), mRNA	ENSMUSG00000020641	1143.01	10.1586	2.41438	0.352451	6.85027	7.37125e-12	5.23565e-10
NM_011779.3	coronin, actin binding protein 1C (Coro1c), mRNA	ENSMUSG00000004530	1137.12	10.1512	1.38763	0.285038	4.86821	1.12612e-06	3.16703e-05
NM_013706.2	CD52 antigen (Cd52), mRNA	ENSMUSG00000000682	1128.65	10.1404	1.00977	0.193105	5.22914	1.70304e-07	5.67841e-06
NM_013912.4	apelin (Apln), mRNA	ENSMUSG00000037010	1124.91	10.1356	3.9941	0.332058	12.0283	2.52217e-33	1.54064e-30
NM_007707.3	suppressor of cytokine signaling 3 (Socs3), mRNA	ENSMUSG00000053113	1122.03	10.1319	4.1222	0.373646	11.0324	2.6672e-28	9.257e-26
NM_133859.2	olfactomedin-like 3 (Olfml3), mRNA	ENSMUSG00000027848	1121.43	10.1311	-1.17935	0.265516	-4.44171	8.92459e-06	0.000197805
NM_001201391.1	hemoglobin, beta adult s chain (Hbb-bs), mRNA	ENSMUSG00000052305	1114.4	10.1221	2.24194	0.690084	3.2488	0.00115895	0.0114478
NM_023275.2	ras homolog family member J (Rhoj), mRNA	ENSMUSG00000046768	1110.08	10.1165	1.42599	0.29632	4.81232	1.4919e-06	4.11241e-05
NM_007913.5	early growth response 1 (Egr1), mRNA	ENSMUSG00000038418	1092.07	10.0928	1.22503	0.344212	3.55895	0.000372347	0.00461161
NM_172471.2	inter-alpha (globulin) inhibitor H5 (Itih5), mRNA	ENSMUSG00000025780	1060.17	10.0501	-3.22484	0.202459	-15.9284	4.02604e-57	4.72936e-54
XM_017316761.2	PREDICTED: synaptosomal-associated protein 25 (Snap25), transcript variant X2, mRNA	ENSMUSG00000027273	1059.29	10.0489	-3.93707	1.10996	-3.54703	0.0003896	0.00479806
NM_001281472.1	protease (prosome, macropain) activator subunit 2B (Psme2b), mRNA	ENSMUSG00000078153	1055.74	10.044	1.39922	0.234729	5.96102	2.50667e-09	1.21137e-07
NM_194054.3	reticulon 4 (Rtn4), transcript variant 1, mRNA	ENSMUSG00000020458	1054.79	10.0427	1.02624	0.378168	2.71372	0.00665319	0.0454387
NM_010219.4	FK506 binding protein 4 (Fkbp4), mRNA	ENSMUSG00000030357	1037.37	10.0187	-1.11165	0.22286	-4.98811	6.09714e-07	1.79721e-05
XM_030245255.2	PREDICTED: SAM and SH3 domain containing 1 (Sash1), transcript variant X1, mRNA	ENSMUSG00000015305	1034	10.014	1.60376	0.366584	4.37489	1.21491e-05	0.000258758
NM_025963.4	ribosomal protein S10 (Rps10), transcript variant 1, mRNA	ENSMUSG00000052146	1024.97	10.0014	1.2789	0.25492	5.01686	5.25238e-07	1.56965e-05
NM_008390.2	interferon regulatory factor 1 (Irf1), transcript variant 1, mRNA	ENSMUSG00000018899	999.184	9.96461	3.96613	1.17222	3.38343	0.000715878	0.00786487
NM_011512.3	surfeit gene 4 (Surf4), mRNA	ENSMUSG00000014867	998.021	9.96293	1.03095	0.227391	4.53384	5.7922e-06	0.000135042
XM_017320867.3	PREDICTED: TRAF type zinc finger domain containing 1 (Trafd1), transcript variant X5, mRNA	ENSMUSG00000042726	989.609	9.95072	1.35007	0.184568	7.31475	2.57855e-13	2.21219e-11
NM_009888.3	complement component factor h (Cfh), mRNA	ENSMUSG00000026365	989.129	9.95002	-1.05942	0.301007	-3.51958	0.000432235	0.00524288
NM_011498.4	basic helix-loop-helix family, member e40 (Bhlhe40), mRNA	ENSMUSG00000030103	984.501	9.94325	2.20073	0.247032	8.90869	5.16404e-19	8.12991e-17
NM_030250.2	NUS1 dehydrodolichyl diphosphate synthase subunit (Nus1), mRNA	ENSMUSG00000023068	978.013	9.93371	1.62299	0.219344	7.39928	1.36924e-13	1.21568e-11
XM_006527282.5	PREDICTED: SWI/SNF related, matrix associated, actin dependent regulator of chromatin, subfamily a, member 2 (Smarca2), transcript variant X1, mRNA	ENSMUSG00000024921	973.674	9.92729	-1.15489	0.281998	-4.09539	4.21452e-05	0.000727494
NM_138741.1	caveolae associated 2 (Cavin2), mRNA	ENSMUSG00000045954	965.636	9.91534	-1.18027	0.426377	-2.76813	0.00563787	0.0401754
NM_023065.3	interferon gamma inducible protein 30 (Ifi30), mRNA	ENSMUSG00000031838	955.592	9.90025	1.76861	0.246384	7.17825	7.06106e-13	5.67523e-11
NM_013640.3	proteasome (prosome, macropain) subunit, beta type 10 (Psmb10), mRNA	ENSMUSG00000031897	954.205	9.89816	1.34586	0.302912	4.44308	8.86794e-06	0.000197121
Gm8034	pseudogene		943.274	9.88153	1.27079	0.189827	6.69447	2.16454e-11	1.4691e-09
NM_144549.4	tribbles pseudokinase 1 (Trib1), mRNA	ENSMUSG00000032501	932.616	9.86514	1.85102	0.250751	7.38191	1.56038e-13	1.37738e-11
NM_023665.3	arginine/serine rich protein 1 (Rsrp1), mRNA	ENSMUSG00000037266	928.322	9.85848	-2.12387	0.490705	-4.32821	1.50327e-05	0.000304853
NM_028595.4	membrane-spanning 4-domains, subfamily A, member 6C (Ms4a6c), transcript variant 1, mRNA	ENSMUSG00000079419	923.582	9.8511	2.88332	0.177011	16.289	1.1822e-59	1.80534e-56
XM_006523730.4	PREDICTED: proteasome (prosome, macropain) subunit, beta type 9 (large multifunctional peptidase 2) (Psmb9), transcript variant X1, mRNA	ENSMUSG00000096727	919.781	9.84515	1.19217	0.445585	2.67551	0.00746155	0.0493483
XM_006495933.5	PREDICTED: solute carrier family 39 (zinc transporter), member 10 (Slc39a10), transcript variant X2, mRNA	ENSMUSG00000025986	915.334	9.83816	-1.82091	0.371109	-4.90668	9.26319e-07	2.63915e-05
NM_027307.4	golgi membrane protein 1 (Golm1), transcript variant 1, mRNA	ENSMUSG00000021556	902.331	9.81751	-1.02169	0.251975	-4.05471	5.01957e-05	0.000846069
XR_004939171.1	PREDICTED: CD200 antigen (Cd200), transcript variant X2, misc_RNA	ENSMUSG00000022661	902.062	9.81708	1.90249	0.451328	4.21533	2.49418e-05	0.000470811
XM_036159554.1	PREDICTED: solute carrier family 38, member 2 (Slc38a2), transcript variant X1, mRNA	ENSMUSG00000022462	897.278	9.80941	1.10514	0.292839	3.77388	0.000160729	0.00230902
XM_006509240.5	PREDICTED: mitochondrial tumor suppressor 1 (Mtus1), transcript variant X2, mRNA	ENSMUSG00000045636	894.903	9.80559	-1.39105	0.383823	-3.6242	0.000289863	0.00379372
NM_007569.2	BTG anti-proliferation factor 1 (Btg1), mRNA	ENSMUSG00000036478	891.269	9.79972	1.10823	0.251165	4.41236	1.02252e-05	0.000222752
NM_010579.2	eukaryotic translation initiation factor 6 (Eif6), mRNA	ENSMUSG00000027613	885.913	9.79102	1.41632	0.186801	7.58195	3.40406e-14	3.2694e-12
NM_013562.2	interferon-related developmental regulator 1 (Ifrd1), mRNA	ENSMUSG00000001627	877.81	9.77776	2.11293	0.169663	12.4537	1.33542e-35	8.86659e-33
XM_006497394.5	PREDICTED: phosphatidylinositol-5-phosphate 4-kinase, type II, alpha (Pip4k2a), transcript variant X1, mRNA	ENSMUSG00000026737	871.65	9.76761	-1.24344	0.33705	-3.68919	0.000224971	0.00306743
NM_008491.1	lipocalin 2 (Lcn2), mRNA	ENSMUSG00000026822	864.426	9.7556	2.25408	0.475908	4.73638	2.17571e-06	5.68925e-05
NM_133887.4	syntaxin 12 (Stx12), mRNA	ENSMUSG00000028879	860.018	9.74822	1.15543	0.330362	3.49747	0.0004697	0.00562131
NM_145923.4	RELT-like 1 (Rell1), mRNA	ENSMUSG00000047881	858.43	9.74556	1.25234	0.130039	9.63047	5.94543e-22	1.21057e-19
XM_006538456.5	PREDICTED: phosphatase and actin regulator 4 (Phactr4), transcript variant X1, mRNA	ENSMUSG00000066043	846.783	9.72585	1.47468	0.196218	7.5155	5.66939e-14	5.2471e-12
NM_026385.4	plasma membrane proteolipid (Pllp), mRNA	ENSMUSG00000031775	839.94	9.71414	-2.76516	0.233825	-11.8258	2.87262e-32	1.51268e-29
NM_010220.4	FK506 binding protein 5 (Fkbp5), mRNA	ENSMUSG00000024222	838.251	9.71124	2.08185	0.33766	6.16552	7.02538e-10	3.80442e-08
NM_011579.3	T cell specific GTPase 1 (Tgtp1), mRNA	ENSMUSG00000078922	834.597	9.70494	3.46872	0.498925	6.95239	3.59153e-12	2.63684e-10
NM_001145953.1	lectin, galactose binding, soluble 3 (Lgals3), transcript variant 1, mRNA	ENSMUSG00000050335	828.419	9.69422	4.35453	0.632808	6.88129	5.9314e-12	4.25251e-10
NM_023044.2	solute carrier family 15, member 3 (Slc15a3), mRNA	ENSMUSG00000024737	826.792	9.69138	1.6796	0.248814	6.75045	1.4739e-11	1.00932e-09
NM_001145164.1	T cell specific GTPase 2 (Tgtp2), mRNA	ENSMUSG00000078921	826.746	9.6913	3.42086	0.508654	6.72531	1.75221e-11	1.19456e-09
NM_021274.2	chemokine (C-X-C motif) ligand 10 (Cxcl10), mRNA	ENSMUSG00000034855	820.558	9.68046	5.26288	0.6544	8.04229	8.81715e-16	1.04377e-13
XM_030249256.2	PREDICTED: receptor transporter protein 4 (Rtp4), transcript variant X2, mRNA	ENSMUSG00000033355	817.742	9.6755	1.04556	0.276779	3.77761	0.000158338	0.00228759
XM_006497531.4	PREDICTED: plexin domain containing 2 (Plxdc2), transcript variant X1, mRNA	ENSMUSG00000026748	816.214	9.6728	-1.74315	0.441094	-3.95188	7.75387e-05	0.0012438
NM_024434.6	leucine aminopeptidase 3 (Lap3), mRNA	ENSMUSG00000039682	815.038	9.67072	1.07839	0.288935	3.73228	0.000189755	0.00265849
NM_145135.3	ribonuclease/angiogenin inhibitor 1 (Rnh1), transcript variant 1, mRNA	ENSMUSG00000038650	803.709	9.65053	1.68748	0.287055	5.87859	4.13765e-09	1.90319e-07
NM_001359117.1	proteolipid protein (myelin) 1 (Plp1), transcript variant 4, mRNA	ENSMUSG00000031425	800.503	9.64476	4.20699	1.26645	3.32189	0.000894101	0.00935193
NM_001284332.1	shisa family member 5 (Shisa5), transcript variant 3, mRNA	ENSMUSG00000025647	792.521	9.63031	-3.01362	0.693488	-4.3456	1.38898e-05	0.000285865
NM_001081549.2	regulator of calcineurin 1 (Rcan1), transcript variant 1, mRNA	ENSMUSG00000022951	791.727	9.62886	1.75112	0.497757	3.51803	0.000434769	0.00526515
NM_026514.3	CDC42 effector protein (Rho GTPase binding) 3 (Cdc42ep3), mRNA	ENSMUSG00000036533	785.42	9.61732	3.17698	0.249884	12.7138	4.9538e-37	3.43861e-34
NM_019521.2	growth arrest specific 6 (Gas6), mRNA	ENSMUSG00000031451	784.876	9.61632	-1.35056	0.127408	-10.6003	2.97088e-26	9.25884e-24
NM_026835.2	membrane-spanning 4-domains, subfamily A, member 6D (Ms4a6d), mRNA	ENSMUSG00000024679	783.915	9.61455	2.41228	0.135548	17.7965	7.52462e-71	1.91514e-67
NM_016740.3	S100 calcium binding protein A11 (S100a11), mRNA	ENSMUSG00000027907	777.126	9.602	1.80086	0.313608	5.74241	9.33412e-09	4.10782e-07
NM_010493.3	intercellular adhesion molecule 1 (Icam1), mRNA	ENSMUSG00000037405	775.36	9.59872	1.62077	0.349899	4.6321	3.61971e-06	8.90123e-05
NM_009627.2	adrenomedullin (Adm), mRNA	ENSMUSG00000030790	766.758	9.58263	5.4573	1.39967	3.89899	9.6595e-05	0.00149453
NM_001287739.1	CCAAT/enhancer binding protein (C/EBP), beta (Cebpb), transcript variant 1, mRNA	ENSMUSG00000056501	759.936	9.56973	3.22129	0.416794	7.72874	1.08619e-14	1.14394e-12
Gm12164	pseudogene		758.55	9.5671	1.34333	0.13328	10.079	6.84463e-24	1.67785e-21
Gm5552	pseudogene		755.766	9.5618	1.85813	0.259091	7.17173	7.40561e-13	5.89016e-11
XM_011245529.3	PREDICTED: ST3 beta-galactoside alpha-2,3-sialyltransferase 1 (St3gal1), transcript variant X2, mRNA	ENSMUSG00000013846	737.072	9.52566	1.83204	0.173823	10.5397	5.67053e-26	1.73189e-23
NR_152154.1	predicted gene, 29679 (Gm29679), long non-coding RNA		722.11	9.49607	-1.27022	0.218445	-5.81482	6.06981e-09	2.76693e-07
NM_001024945.1	quiescin Q6 sulfhydryl oxidase 1 (Qsox1), transcript variant 1, mRNA	ENSMUSG00000033684	721.208	9.49427	1.19437	0.190894	6.25671	3.93172e-10	2.19129e-08
NM_133349.3	zinc finger, AN1-type domain 2A (Zfand2a), transcript variant 1, mRNA	ENSMUSG00000053581	713.845	9.47947	2.64967	0.468259	5.65856	1.52645e-08	6.43932e-07
NM_008973.3	pleiotrophin (Ptn), mRNA	ENSMUSG00000029838	709.9	9.47147	-3.04488	1.00859	-3.01894	0.0025366	0.0215562
NM_021880.4	protein kinase, cAMP dependent regulatory, type I, alpha (Prkar1a), transcript variant 3, mRNA	ENSMUSG00000020612	709.542	9.47074	1.09861	0.173478	6.33283	2.40711e-10	1.39239e-08
XM_036163924.1	PREDICTED: ribosomal protein S6 kinase polypeptide 1 (Rps6ka1), transcript variant X1, mRNA	ENSMUSG00000003644	706.619	9.46479	-1.13895	0.235911	-4.82786	1.38006e-06	3.8318e-05
XM_036156602.1	PREDICTED: ATP-binding cassette, sub-family A (ABC1), member 9 (Abca9), transcript variant X1, mRNA	ENSMUSG00000041797	703.389	9.45818	-2.04788	0.532369	-3.84673	0.000119707	0.00180244
NM_008235.2	hes family bHLH transcription factor 1 (Hes1), mRNA	ENSMUSG00000022528	701.594	9.45449	1.845	0.39932	4.62035	3.83096e-06	9.3009e-05
NM_010119.5	EH-domain containing 1 (Ehd1), mRNA	ENSMUSG00000024772	697.2	9.44543	2.07922	0.335003	6.20656	5.41581e-10	2.96433e-08
NM_009026.5	RAS, dexamethasone-induced 1 (Rasd1), mRNA	ENSMUSG00000049892	695.48	9.44187	4.16103	1.11653	3.72674	0.00019397	0.00270513
XR_003954673.1	PREDICTED: predicted gene 6485 (Gm6485), misc_RNA	ENSMUSG00000089999	695.321	9.44154	1.42367	0.366156	3.88815	0.000101011	0.00154718
NM_178892.5	TCDD-inducible poly(ADP-ribose) polymerase (Tiparp), mRNA	ENSMUSG00000034640	692.7	9.43609	2.80267	0.493058	5.68426	1.31379e-08	5.65153e-07
NM_009477.3	uridine phosphorylase 1 (Upp1), transcript variant 1, mRNA	ENSMUSG00000020407	687.772	9.42579	6.28621	0.7361	8.53989	1.34351e-17	1.85327e-15
NM_153175.3	GTPase, IMAP family member 6 (Gimap6), mRNA	ENSMUSG00000047867	684.755	9.41944	1.97929	0.229778	8.61393	7.05959e-18	9.89054e-16
NM_001013371.2	deltex 3-like, E3 ubiquitin ligase (Dtx3l), mRNA	ENSMUSG00000049502	684.49	9.41888	1.07516	0.199361	5.39305	6.92702e-08	2.50077e-06
Gm15590	pseudogene		682.723	9.41516	1.31192	0.141721	9.25701	2.10239e-20	3.73321e-18
NM_001114665.2	formin binding protein 1-like (Fnbp1l), transcript variant 1, mRNA	ENSMUSG00000039735	670.627	9.38937	-1.12535	0.118246	-9.51705	1.7816e-21	3.53336e-19
XM_006520986.3	PREDICTED: DAZ associated protein 2 (Dazap2), transcript variant X1, mRNA	ENSMUSG00000000346	661.332	9.36923	-4.03371	1.26032	-3.20056	0.00137161	0.0130993
XR_004942002.1	PREDICTED: major facilitator superfamily domain containing 2A (Mfsd2a), transcript variant X3, misc_RNA	ENSMUSG00000028655	653.222	9.35143	-1.35528	0.445435	-3.0426	0.00234541	0.0202583
NM_145445.4	eukaryotic translation initiation factor 2B, subunit 2 beta (Eif2b2), mRNA	ENSMUSG00000004788	653.146	9.35126	1.43535	0.279764	5.13057	2.8886e-07	9.10999e-06
NM_008614.3	myelin-associated oligodendrocytic basic protein (Mobp), transcript variant 1, mRNA	ENSMUSG00000032517	651.205	9.34697	1.24517	0.290176	4.2911	1.77789e-05	0.000353361
NM_029023.3	serine carboxypeptidase 1 (Scpep1), mRNA	ENSMUSG00000000278	649.023	9.34213	1.13951	0.260923	4.36722	1.25839e-05	0.000266603
XM_006515070.4	PREDICTED: diacylglycerol kinase, beta (Dgkb), transcript variant X4, mRNA	ENSMUSG00000036095	645.404	9.33406	-2.01643	0.226903	-8.88674	6.29304e-19	9.80622e-17
NM_152804.2	polo like kinase 2 (Plk2), mRNA	ENSMUSG00000021701	639.475	9.32074	2.05445	0.28584	7.18744	6.60194e-13	5.36267e-11
XM_006534846.5	PREDICTED: tetratricopeptide repeat domain 28 (Ttc28), transcript variant X2, mRNA	ENSMUSG00000033209	637.206	9.31562	-1.55468	0.160793	-9.66885	4.08963e-22	8.55516e-20
NM_011408.1	schlafen 2 (Slfn2), mRNA	ENSMUSG00000072620	631.441	9.3025	2.01888	0.171028	11.8044	3.70245e-32	1.88467e-29
NR_030738.1	RIKEN cDNA 2410006H16 gene (2410006H16Rik), long non-coding RNA	ENSMUSG00000086841	629.224	9.29743	1.32464	0.299876	4.4173	9.99421e-06	0.000218564
NM_008654.2	protein phosphatase 1, regulatory subunit 15A (Ppp1r15a), mRNA	ENSMUSG00000040435	628.799	9.29645	3.60151	0.414952	8.67935	3.98038e-18	5.78898e-16
NM_001166480.2	signal sequence receptor, delta (Ssr4), transcript variant 1, mRNA	ENSMUSG00000002014	628.516	9.2958	1.53652	0.557547	2.75586	0.00585383	0.0413095
NM_001168294.1	serine (or cysteine) peptidase inhibitor, clade A, member 3F (Serpina3f), transcript variant 1, mRNA	ENSMUSG00000066363	623.356	9.28391	5.72755	0.714051	8.02122	1.04704e-15	1.22056e-13
XM_006499911.5	PREDICTED: coiled-coil domain containing 141 (Ccdc141), transcript variant X1, mRNA	ENSMUSG00000044033	621.12	9.27873	-1.20273	0.309237	-3.88934	0.000100518	0.00154117
NM_001113248.2	transcriptional regulator, SIN3B (yeast) (Sin3b), transcript variant 2, mRNA	ENSMUSG00000031622	619.046	9.2739	1.10429	0.252627	4.37124	1.23545e-05	0.000262766
Ftl1-ps1	pseudogene		618.68	9.27305	1.29734	0.143571	9.03618	1.62237e-19	2.664e-17
XM_011243665.3	PREDICTED: insulin-like growth factor binding protein 3 (Igfbp3), transcript variant X1, mRNA	ENSMUSG00000020427	612.239	9.25795	2.29831	0.295461	7.77872	7.3263e-15	7.82378e-13
XM_030241972.2	PREDICTED: latent transforming growth factor beta binding protein 4 (Ltbp4), transcript variant X4, mRNA	ENSMUSG00000040488	595.989	9.21914	-3.35733	0.246887	-13.5987	4.07804e-42	3.11379e-39
NM_009649.3	paralemmin A kinase anchor protein (Pakap), transcript variant 3, mRNA	ENSMUSG00000038729	586.811	9.19675	1.80048	0.599178	3.00492	0.00265654	0.0223146
XM_036154203.1	PREDICTED: spalt like transcription factor 1 (Sall1), transcript variant X1, mRNA	ENSMUSG00000031665	581.722	9.18419	-2.25255	0.552111	-4.07988	4.50581e-05	0.000773126
NM_013610.3	ninjurin 1 (Ninj1), mRNA	ENSMUSG00000037966	579.577	9.17886	1.09043	0.280906	3.88184	0.000103667	0.00158335
Pgk1-rs7	pseudogene		576.881	9.17213	1.5858	0.146044	10.8583	1.82047e-27	6.17786e-25
NM_009890.2	cholesterol 25-hydroxylase (Ch25h), mRNA	ENSMUSG00000050370	572.231	9.16045	3.26492	0.491154	6.64745	2.98218e-11	1.93791e-09
NM_009223.3	stannin (Snn), mRNA	ENSMUSG00000037972	571.175	9.15779	-1.32101	0.201514	-6.55546	5.5472e-11	3.44355e-09
NM_010234.3	FBJ osteosarcoma oncogene (Fos), mRNA	ENSMUSG00000021250	564.529	9.1409	3.47037	0.321744	10.7861	4.00229e-27	1.3004e-24
NM_001159551.1	histocompatibility 13 (H13), transcript variant 1, mRNA	ENSMUSG00000019188	560.096	9.12953	1.40276	0.419265	3.34576	0.000820564	0.00875058
NM_010217.2	cellular communication network factor 2 (Ccn2), mRNA	ENSMUSG00000019997	557.225	9.12212	1.50466	0.412756	3.64539	0.000266986	0.00355772
NM_026792.3	1-acylglycerol-3-phosphate O-acyltransferase 5 (lysophosphatidic acid acyltransferase, epsilon) (Agpat5), mRNA	ENSMUSG00000031467	555.325	9.11719	1.5781	0.13837	11.4049	3.95193e-30	1.72428e-27
NM_001289531.1	CNDP dipeptidase 2 (metallopeptidase M20 family) (Cndp2), transcript variant 1, mRNA	ENSMUSG00000024644	552.847	9.11074	1.37351	0.260185	5.27899	1.29901e-07	4.44781e-06
NM_133807.2	leucine rich repeat containing 59 (Lrrc59), mRNA	ENSMUSG00000020869	551.769	9.10792	1.10922	0.183601	6.04148	1.52707e-09	7.67104e-08
NR_038116.1	chemokine (C-X-C motif) ligand 11 (Cxcl11), transcript variant 1, non-coding, non-coding RNA	ENSMUSG00000060183	547.862	9.09767	4.12737	1.21253	3.40394	0.000664219	0.00742554
NR_102366.1	expressed sequence AW112010 (AW112010), long non-coding RNA	ENSMUSG00000075010	545.702	9.09197	1.3188	0.174813	7.54407	4.55522e-14	4.294e-12
NM_001001881.2	RIKEN cDNA 2510009E07 gene (2510009E07Rik), mRNA	ENSMUSG00000043391	545.637	9.0918	-1.00149	0.273859	-3.65695	0.000255232	0.00341899
NM_007607.2	carbonic anhydrase 4 (Car4), mRNA	ENSMUSG00000000805	543.729	9.08674	-4.11047	1.33048	-3.08947	0.00200514	0.0178441
XM_036163141.1	PREDICTED: family with sequence similarity 102, member B (Fam102b), transcript variant X1, mRNA	ENSMUSG00000040339	542.465	9.08339	-1.43848	0.262717	-5.47541	4.36509e-08	1.67066e-06
XM_006498860.4	PREDICTED: MER proto-oncogene tyrosine kinase (Mertk), transcript variant X1, mRNA	ENSMUSG00000014361	537.145	9.06917	-6.40751	1.41944	-4.51412	6.35808e-06	0.000146447
NM_025578.4	mitochondrial ribosomal protein S25 (Mrps25), mRNA; nuclear gene for mitochondrial product	ENSMUSG00000014551	525.622	9.03788	-1.01232	0.372202	-2.71982	0.00653167	0.0448093
Gm5537	pseudogene		520.639	9.02414	1.55527	0.14905	10.4346	1.72399e-25	4.87538e-23
NM_009344.3	pleckstrin homology like domain, family A, member 1 (Phlda1), mRNA	ENSMUSG00000020205	517.746	9.0161	2.50763	0.31542	7.95012	1.86332e-15	2.12349e-13
NR_104438.1	calmin (Clmn), transcript variant 3, non-coding RNA	ENSMUSG00000021097	514.4	9.00675	-2.49499	0.797124	-3.12999	0.00174812	0.0160719
Gm9790	pseudogene		512.082	9.00023	1.41995	0.255397	5.55979	2.70104e-08	1.09121e-06
NM_144559.2	Fc receptor, IgG, low affinity IV (Fcgr4), mRNA	ENSMUSG00000059089	510.717	8.99638	3.63295	0.194319	18.6958	5.35732e-78	2.04529e-74
NM_001135115.1	predicted gene 12250 (Gm12250), mRNA	ENSMUSG00000004069	508.21	8.98928	4.03852	0.394136	10.2465	1.22684e-24	3.12252e-22
NM_025289.3	transforming growth factor beta regulated gene 1 (Tbrg1), mRNA	ENSMUSG00000011114	507.559	8.98743	1.08728	0.127383	8.53557	1.39471e-17	1.90166e-15
NM_031194.5	solute carrier family 22 (organic anion transporter), member 8 (Slc22a8), transcript variant 1, mRNA	ENSMUSG00000063796	506.085	8.98324	-4.7957	1.19898	-3.99981	6.33925e-05	0.00103604
XM_006512040.4	PREDICTED: cysteine-serine-rich nuclear protein 1 (Csrnp1), transcript variant X1, mRNA	ENSMUSG00000032515	505.958	8.98287	3.52263	0.507018	6.94774	3.71179e-12	2.71209e-10
NM_011756.4	zinc finger protein 36 (Zfp36), mRNA	ENSMUSG00000044786	499.593	8.96461	2.2527	0.24077	9.35622	8.26419e-21	1.50241e-18
NM_001033141.2	endothelial cell surface expressed chemotaxis and apoptosis regulator (Ecscr), transcript variant 3, mRNA	ENSMUSG00000073599	498.531	8.96154	1.346	0.411481	3.27112	0.00107124	0.0107695
NM_007792.4	cysteine and glycine-rich protein 2 (Csrp2), mRNA	ENSMUSG00000020186	496.564	8.95583	-1.78548	0.411446	-4.33952	1.42791e-05	0.000292693
NR_002883.1	predicted gene 5643 (Gm5643), non-coding RNA	ENSMUSG00000083311	495.97	8.95411	1.05563	0.189595	5.56781	2.57968e-08	1.04772e-06
NM_001347382.1	histocompatibility 2, T region locus 22 (H2-T22), transcript variant 2, mRNA	ENSMUSG00000056116	493.921	8.94814	1.75228	0.192115	9.12095	7.44695e-20	1.27778e-17
NM_008247.3	phospholipid phosphatase 1 (Plpp1), transcript variant 1, mRNA	ENSMUSG00000021759	493.613	8.94724	2.20266	0.277576	7.93534	2.09913e-15	2.3745e-13
NM_001039081.2	MEIR1 treanscription regulator (Mier1), transcript variant 2, mRNA	ENSMUSG00000028522	490.78	8.93893	-1.19701	0.277993	-4.3059	1.6631e-05	0.000333297
XM_036156104.1	PREDICTED: NUAK family, SNF1-like kinase, 1 (Nuak1), transcript variant X1, mRNA	ENSMUSG00000020032	487.977	8.93067	-1.5783	0.44589	-3.53967	0.000400628	0.00491011
NM_009952.2	cAMP responsive element binding protein 1 (Creb1), transcript variant B, mRNA	ENSMUSG00000025958	487.794	8.93013	-1.85702	0.671507	-2.76545	0.00568438	0.0404498
NM_001082960.1	integrin alpha M (Itgam), transcript variant 1, mRNA	ENSMUSG00000030786	487.501	8.92926	-1.32369	0.392277	-3.37436	0.000739865	0.00805309
NM_026473.2	tubulin, beta 6 class V (Tubb6), mRNA	ENSMUSG00000001473	486.683	8.92684	4.1305	0.381433	10.8289	2.51145e-27	8.33748e-25
NM_008599.4	chemokine (C-X-C motif) ligand 9 (Cxcl9), mRNA	ENSMUSG00000029417	486.205	8.92542	5.25506	0.763213	6.88544	5.76088e-12	4.1694e-10
XM_006527625.5	PREDICTED: G protein-coupled receptor 34 (Gpr34), transcript variant X2, mRNA	ENSMUSG00000040229	485.168	8.92234	-4.04131	1.49787	-2.69803	0.00697505	0.0470503
XM_030248364.1	PREDICTED: parvin, beta (Parvb), transcript variant X2, mRNA	ENSMUSG00000022438	483.792	8.91824	-3.13148	1.02954	-3.04163	0.00235297	0.0203034
NM_011198.4	prostaglandin-endoperoxide synthase 2 (Ptgs2), mRNA	ENSMUSG00000032487	482.933	8.91568	3.50055	0.298511	11.7267	9.30318e-32	4.43965e-29
NM_001042534.3	capping protein (actin filament), gelsolin-like (Capg), transcript variant 2, mRNA	ENSMUSG00000056737	482.098	8.91318	1.88561	0.35107	5.37105	7.82791e-08	2.8061e-06
NM_009698.2	adenine phosphoribosyl transferase (Aprt), mRNA	ENSMUSG00000006589	481.566	8.91159	1.15253	0.190097	6.06283	1.33748e-09	6.92362e-08
NM_013869.5	tumor necrosis factor receptor superfamily, member 19 (Tnfrsf19), transcript variant 1, mRNA	ENSMUSG00000060548	479.001	8.90388	-2.14716	0.397225	-5.40539	6.46682e-08	2.36256e-06
XR_004936246.1	PREDICTED: androgen-induced 1 (Aig1), transcript variant X9, misc_RNA	ENSMUSG00000019806	477.965	8.90076	1.26215	0.29097	4.33773	1.43961e-05	0.000293908
Gm7776	pseudogene		476.226	8.8955	1.60503	0.220839	7.2679	3.65131e-13	3.09773e-11
NM_031166.3	inhibitor of DNA binding 4 (Id4), mRNA	ENSMUSG00000021379	475.887	8.89448	-1.24252	0.303421	-4.09504	4.22099e-05	0.000727524
XR_878851.3	PREDICTED: membrane-bound transcription factor peptidase, site 1 (Mbtps1), transcript variant X6, misc_RNA	ENSMUSG00000031835	473.64	8.88765	-1.08973	0.237997	-4.57875	4.67759e-06	0.000110575
NM_177632.3	family with sequence similarity 43, member A (Fam43a), mRNA	ENSMUSG00000046546	467.642	8.86926	1.11762	0.306546	3.64586	0.0002665	0.00355745
XM_030244696.2	PREDICTED: solute carrier family 38, member 3 (Slc38a3), transcript variant X2, mRNA	ENSMUSG00000010064	466.297	8.86511	-1.95275	0.380084	-5.13768	2.78153e-07	8.79437e-06
NM_172625.2	INO80 complex subunit C (Ino80c), mRNA	ENSMUSG00000047989	462.635	8.85373	1.11945	0.270745	4.13472	3.55392e-05	0.00063476
NM_001166409.2	RNA binding motif (RNP1, RRM) protein 3 (Rbm3), transcript variant 2, mRNA	ENSMUSG00000031167	460.879	8.84824	2.37149	0.425607	5.57201	2.51819e-08	1.02548e-06
XR_001782347.3	PREDICTED: methyl-CpG binding domain protein 2 (Mbd2), transcript variant X1, misc_RNA	ENSMUSG00000024513	457.933	8.83899	1.38297	0.135752	10.1874	2.25669e-24	5.64949e-22
XM_030252421.2	PREDICTED: guanylate binding protein 2b (Gbp2b), transcript variant X1, mRNA	ENSMUSG00000040264	456.964	8.83594	1.86799	0.504104	3.70556	0.000210921	0.00291227
NM_009954.3	breast cancer anti-estrogen resistance 1 (Bcar1), transcript variant 2, mRNA	ENSMUSG00000031955	456.009	8.83292	1.42312	0.261975	5.43225	5.56475e-08	2.06762e-06
XM_030254307.1	PREDICTED: calcium/calmodulin-dependent protein kinase kinase 2, beta (Camkk2), transcript variant X10, mRNA	ENSMUSG00000029471	455.669	8.83184	-1.00653	0.189643	-5.3075	1.1114e-07	3.88378e-06
NM_001357628.1	ribosomal protein L10A (Rpl10a), transcript variant 2, mRNA	ENSMUSG00000037805	452.248	8.82097	-5.58597	1.89469	-2.94822	0.00319611	0.025818
XM_006514761.5	PREDICTED: receptor (calcitonin) activity modifying protein 3 (Ramp3), transcript variant X1, mRNA	ENSMUSG00000041046	450.516	8.81543	4.85551	1.16914	4.15307	3.28046e-05	0.000596171
XM_011245972.4	PREDICTED: ST3 beta-galactoside alpha-2,3-sialyltransferase 6 (St3gal6), transcript variant X7, mRNA	ENSMUSG00000022747	450.233	8.81453	-1.66731	0.542838	-3.07147	0.00213008	0.0187917
NM_008828.3	phosphoglycerate kinase 1 (Pgk1), mRNA	ENSMUSG00000062070	450.078	8.81403	1.5287	0.148709	10.2798	8.68934e-25	2.28784e-22
NM_001364846.1	prickle planar cell polarity protein 1 (Prickle1), transcript variant 2, mRNA	ENSMUSG00000036158	439.765	8.78059	-1.30416	0.260458	-5.00721	5.52259e-07	1.64718e-05
XR_004934391.1	PREDICTED: predicted gene 8995 (Gm8995), misc_RNA	ENSMUSG00000114754	437.094	8.7718	1.39638	0.295636	4.7233	2.3205e-06	6.02659e-05
NM_021540.4	ring finger protein 130 (Rnf130), transcript variant 1, mRNA	ENSMUSG00000020376	436.795	8.77081	-1.0303	0.344804	-2.98808	0.00280732	0.0232866
NM_010499.4	immediate early response 2 (Ier2), mRNA	ENSMUSG00000053560	435.296	8.76585	2.22401	0.287939	7.72391	1.12816e-14	1.17198e-12
XM_011243887.4	PREDICTED: EFR3 homolog B (Efr3b), transcript variant X1, mRNA	ENSMUSG00000020658	434.473	8.76312	-1.09656	0.200893	-5.45841	4.80419e-08	1.81148e-06
NM_001017426.2	KDM1 lysine (K)-specific demethylase 6B (Kdm6b), mRNA	ENSMUSG00000018476	433.274	8.75914	2.44499	0.352741	6.93141	4.16675e-12	3.03002e-10
XM_030254744.2	PREDICTED: WD repeat and SOCS box-containing 2 (Wsb2), transcript variant X1, mRNA	ENSMUSG00000029364	432.369	8.75612	-5.76414	0.251497	-22.9193	2.98111e-116	2.27623e-112
NM_009112.2	S100 calcium binding protein A10 (calpactin) (S100a10), mRNA	ENSMUSG00000041959	431.109	8.75191	1.26043	0.195661	6.44188	1.18003e-10	7.01179e-09
NM_011313.2	S100 calcium binding protein A6 (calcyclin) (S100a6), mRNA	ENSMUSG00000001025	426.846	8.73757	1.89991	0.439188	4.32595	1.51878e-05	0.000307196
XM_036156140.1	PREDICTED: RNA binding motif (RNP1, RRM) protein 3 (Rbm3-ps), mRNA	ENSMUSG00000031167	424.99	8.73128	2.3808	0.430311	5.53274	3.15261e-08	1.24402e-06
NM_001077189.1	Fc receptor, IgG, low affinity IIb (Fcgr2b), transcript variant 1, mRNA	ENSMUSG00000026656	422.045	8.72125	1.08889	0.184612	5.89825	3.67385e-09	1.71047e-07
NM_026772.2	CDC42 effector protein (Rho GTPase binding) 2 (Cdc42ep2), mRNA	ENSMUSG00000045664	418.837	8.71024	1.67359	0.169614	9.86707	5.78285e-23	1.33803e-20
NM_009197.2	solute carrier family 16 (monocarboxylic acid transporters), member 2 (Slc16a2), mRNA	ENSMUSG00000033965	411.915	8.6862	-1.80046	0.320727	-5.61368	1.98068e-08	8.17486e-07
NM_008173.4	nuclear receptor subfamily 3, group C, member 1 (Nr3c1), transcript variant 1, mRNA	ENSMUSG00000024431	410.683	8.68188	-3.05744	0.4787	-6.38696	1.69212e-10	9.90052e-09
NM_013657.5	sema domain, immunoglobulin domain (Ig), short basic domain, secreted, (semaphorin) 3C (Sema3c), mRNA	ENSMUSG00000028780	408.22	8.6732	-2.28274	0.348718	-6.5461	5.90597e-11	3.65142e-09
NM_013863.5	BCL2-associated athanogene 3 (Bag3), mRNA	ENSMUSG00000030847	408.073	8.67268	1.2727	0.375413	3.39012	0.000698614	0.00773209
XM_036165786.1	PREDICTED: cyclin D2 (Ccnd2), transcript variant X2, mRNA	ENSMUSG00000000184	407.169	8.66948	-1.04383	0.193283	-5.40056	6.64326e-08	2.42122e-06
NR_151497.1	chemokine (C-X-C motif) ligand 16 (Cxcl16), transcript variant 3, non-coding RNA	ENSMUSG00000018920	401.157	8.64802	2.05726	0.147734	13.9255	4.43698e-44	3.56617e-41
NM_025630.3	angiogenic factor with G patch and FHA domains 1 (Aggf1), mRNA	ENSMUSG00000021681	400.932	8.64722	-1.02094	0.308863	-3.30549	0.000948098	0.00976726
XM_006522347.3	PREDICTED: calcium regulated heat stable protein 1 (Carhsp1), transcript variant X2, mRNA	ENSMUSG00000008393	400.548	8.64583	1.18138	0.251068	4.70543	2.53334e-06	6.45853e-05
NM_016900.4	caveolin 2 (Cav2), transcript variant 1, mRNA	ENSMUSG00000000058	399.03	8.64035	-1.04651	0.246521	-4.2451	2.18492e-05	0.00042182
NM_009228.2	syntrophin, acidic 1 (Snta1), mRNA	ENSMUSG00000027488	398.58	8.63873	-1.05021	0.153735	-6.83129	8.41545e-12	5.94965e-10
NM_029803.3	interferon, alpha-inducible protein 27 like 2A (Ifi27l2a), transcript variant 1, mRNA	ENSMUSG00000079017	395.754	8.62846	2.12269	0.705252	3.00984	0.00261388	0.0220656
NM_173873.1	chloride channel, voltage-sensitive 3 (Clcn3), transcript variant b, mRNA	ENSMUSG00000004319	395.221	8.62652	-1.16685	0.240465	-4.8525	1.21915e-06	3.40359e-05
XM_006505722.3	PREDICTED: 8-oxoguanine DNA-glycosylase 1 (Ogg1), transcript variant X2, mRNA	ENSMUSG00000030271	394.246	8.62295	-4.67108	1.04077	-4.48809	7.18647e-06	0.000163554
NM_153119.3	pleckstrin homology domain containing, family O member 2 (Plekho2), mRNA	ENSMUSG00000048807	393.847	8.62149	1.88358	0.192296	9.79521	1.18053e-22	2.69073e-20
NM_011190.3	proteasome (prosome, macropain) activator subunit 2 (PA28 beta) (Psme2), transcript variant 1, mRNA	ENSMUSG00000079197	393.459	8.62007	1.47852	0.182341	8.10858	5.1215e-16	6.20718e-14
NM_028597.3	THO complex 3 (Thoc3), mRNA	ENSMUSG00000025872	391.248	8.61194	1.01226	0.349326	2.89775	0.00375848	0.0295211
XM_006502930.4	PREDICTED: TEK receptor tyrosine kinase (Tek), transcript variant X1, mRNA	ENSMUSG00000006386	386.338	8.59372	-2.51279	0.443649	-5.6639	1.47968e-08	6.2767e-07
XM_011249411.4	PREDICTED: guanylate binding protein 4 (Gbp4), transcript variant X3, mRNA	ENSMUSG00000079363	379.882	8.56941	2.88475	0.477959	6.03557	1.58407e-09	7.93127e-08
NM_020011.5	sphingosine kinase 2 (Sphk2), transcript variant 2, mRNA	ENSMUSG00000057342	379.349	8.56738	-1.27254	0.337573	-3.76967	0.000163466	0.00234173
XM_006535076.5	PREDICTED: heterogeneous nuclear ribonucleoprotein D-like (Hnrnpdl), transcript variant X2, mRNA	ENSMUSG00000029328	376.057	8.55481	4.24624	1.32406	3.207	0.00134127	0.012874
NM_178045.4	Ras association (RalGDS/AF-6) domain family member 4 (Rassf4), mRNA	ENSMUSG00000042129	375.928	8.55431	-1.19933	0.30732	-3.90254	9.51895e-05	0.00148179
XM_006499907.5	PREDICTED: solute carrier family 23 (nucleobase transporters), member 2 (Slc23a2), transcript variant X2, mRNA	ENSMUSG00000027340	374.402	8.54844	1.05946	0.240437	4.40638	1.05112e-05	0.000228331
NM_172479.3	solute carrier family 38, member 5 (Slc38a5), mRNA	ENSMUSG00000031170	374.347	8.54823	-3.56857	0.58367	-6.11402	9.71534e-10	5.16944e-08
XM_036156202.1	PREDICTED: arginyl-tRNA synthetase (Rars), transcript variant X1, mRNA	ENSMUSG00000018848	373.013	8.54308	1.24299	0.236062	5.26554	1.39776e-07	4.75396e-06
XM_006532178.5	PREDICTED: enhancer of zeste 1 polycomb repressive complex 2 subunit (Ezh1), transcript variant X1, mRNA	ENSMUSG00000006920	372.591	8.54145	-1.29521	0.214151	-6.04813	1.46533e-09	7.43425e-08
NM_007534.3	B cell leukemia/lymphoma 2 related protein A1b (Bcl2a1b), mRNA	ENSMUSG00000089929	371.27	8.53633	1.22489	0.208387	5.87797	4.15319e-09	1.9046e-07
XM_006502212.4	PREDICTED: terminal nucleotidyltransferase 5C (Tent5c), transcript variant X1, mRNA	ENSMUSG00000044468	370.314	8.53261	1.25567	0.40144	3.1279	0.00176058	0.0161477
NM_023731.3	coiled-coil domain containing 86 (Ccdc86), mRNA	ENSMUSG00000024732	368.866	8.52695	2.41142	0.205528	11.7328	8.65498e-32	4.26355e-29
XM_006507927.4	PREDICTED: SET binding factor 2 (Sbf2), transcript variant X1, mRNA	ENSMUSG00000038371	364.89	8.51132	-1.16214	0.341149	-3.40655	0.000657885	0.00736874
NM_010831.3	salt inducible kinase 1 (Sik1), mRNA	ENSMUSG00000024042	363.225	8.50472	2.50761	0.47318	5.29948	1.16132e-07	4.02144e-06
NM_008917.3	palmitoyl-protein thioesterase 1 (Ppt1), mRNA	ENSMUSG00000028657	361.446	8.49764	-2.00049	0.493936	-4.05011	5.11943e-05	0.000859109
XM_006526816.4	PREDICTED: deltex 4, E3 ubiquitin ligase (Dtx4), transcript variant X1, mRNA	ENSMUSG00000039982	358.401	8.48543	-1.29491	0.24297	-5.3295	9.84813e-08	3.48127e-06
XM_011240521.2	PREDICTED: argonaute RISC catalytic subunit 1 (Ago1), transcript variant X1, mRNA	ENSMUSG00000041530	355.884	8.47526	-1.3063	0.288302	-4.53102	5.86998e-06	0.000136439
NM_010387.3	histocompatibility 2, class II, locus Mb1 (H2-DMb1), mRNA	ENSMUSG00000079547	354.687	8.4704	1.22669	0.258105	4.75267	2.00753e-06	5.30053e-05
NR_138563.1	zinc finger, NFX1-type containing 1, antisense RNA 1 (Zfas1), long non-coding RNA	ENSMUSG00000074578	354.262	8.46867	1.26908	0.272398	4.6589	3.17901e-06	7.91952e-05
NM_134054.2	serine palmitoyltransferase, small subunit A (Sptssa), mRNA	ENSMUSG00000044408	354.024	8.4677	-1.02454	0.214684	-4.77234	1.821e-06	4.87013e-05
NM_010683.2	laminin, gamma 1 (Lamc1), mRNA	ENSMUSG00000026478	353.416	8.46522	1.58348	0.294566	5.37564	7.631e-08	2.74842e-06
XM_006538495.4	PREDICTED: agrin (Agrn), transcript variant X7, mRNA	ENSMUSG00000041936	349.067	8.44736	-1.22397	0.30105	-4.06567	4.78948e-05	0.000810867
Gm6682	pseudogene		348.587	8.44537	3.83403	0.269812	14.21	7.94279e-46	6.73858e-43
NM_001081278.2	TBC1 domain family, member 4 (Tbc1d4), mRNA	ENSMUSG00000033083	346.827	8.43807	-2.26735	0.233564	-9.70763	2.79758e-22	6.10313e-20
XM_006532766.5	PREDICTED: NEDD4 binding protein 3 (N4bp3), transcript variant X3, mRNA	ENSMUSG00000001053	345.253	8.43151	1.84943	0.256712	7.20429	5.83469e-13	4.79041e-11
NM_010734.2	leukocyte specific transcript 1 (Lst1), mRNA	ENSMUSG00000073412	343.781	8.42534	-1.64769	0.468707	-3.51539	0.000439112	0.00529894
NM_007498.3	activating transcription factor 3 (Atf3), mRNA	ENSMUSG00000026628	341.741	8.41676	3.01415	0.458541	6.57334	4.91982e-11	3.09179e-09
NM_175116.4	lysophosphatidic acid receptor 6 (Lpar6), mRNA	ENSMUSG00000033446	341.715	8.41665	-1.22255	0.279778	-4.36974	1.24397e-05	0.00026421
NM_173011.2	isocitrate dehydrogenase 2 (NADP+), mitochondrial (Idh2), mRNA; nuclear gene for mitochondrial product	ENSMUSG00000030541	340.919	8.41328	-1.15455	0.242116	-4.76859	1.8552e-06	4.95292e-05
NM_011124.4	chemokine (C-C motif) ligand 21A (serine) (Ccl21a), mRNA	ENSMUSG00000094686	340.328	8.41078	1.38502	0.508418	2.72418	0.00644623	0.0443942
NM_009236.2	SRY (sex determining region Y)-box 18 (Sox18), mRNA	ENSMUSG00000046470	334.635	8.38644	-2.06512	0.700486	-2.94813	0.00319703	0.025818
NM_009063.4	regulator of G-protein signaling 5 (Rgs5), transcript variant 1, mRNA	ENSMUSG00000026678	329.694	8.36498	-1.4907	0.498325	-2.99141	0.00277689	0.0230969
NM_013563.4	interleukin 2 receptor, gamma chain (Il2rg), transcript variant a, mRNA	ENSMUSG00000031304	328.775	8.36096	1.75293	0.319352	5.48903	4.04154e-08	1.55855e-06
NM_009397.3	tumor necrosis factor, alpha-induced protein 3 (Tnfaip3), transcript variant 1, mRNA	ENSMUSG00000019850	327.049	8.35336	2.48513	0.410796	6.04955	1.45252e-09	7.39379e-08
NM_019949.2	ubiquitin-conjugating enzyme E2L 6 (Ube2l6), mRNA	ENSMUSG00000027078	326.749	8.35204	2.08714	0.312086	6.68771	2.26689e-11	1.53175e-09
XM_030254217.2	PREDICTED: protein tyrosine phosphatase, non-receptor type 12 (Ptpn12), transcript variant X4, mRNA	ENSMUSG00000028771	324.132	8.34044	1.06353	0.337214	3.15386	0.00161126	0.0149851
NM_011817.2	growth arrest and DNA-damage-inducible 45 gamma (Gadd45g), mRNA	ENSMUSG00000021453	323.528	8.33775	1.67754	0.349709	4.79696	1.61091e-06	4.37727e-05
XR_003955646.2	PREDICTED: two pore channel 1 (Tpcn1), transcript variant X4, misc_RNA	ENSMUSG00000032741	322.967	8.33524	-1.34977	0.293287	-4.60222	4.1802e-06	0.000100529
NM_001081114.2	CAP-GLY domain containing linker protein 3 (Clip3), transcript variant 1, mRNA	ENSMUSG00000013921	322.372	8.33258	-3.35446	0.875913	-3.82967	0.000128313	0.00190786
NM_016710.2	high-mobility group nucleosome binding domain 5 (Hmgn5), mRNA	ENSMUSG00000031245	321.852	8.33025	1.21598	0.355596	3.41954	0.000627274	0.00707467
NM_025346.1	required for meiotic nuclear division 5 homolog B (Rmnd5b), mRNA	ENSMUSG00000001054	318.422	8.3148	1.03866	0.270377	3.84154	0.000122267	0.00183774
NM_018851.4	SAM domain and HD domain, 1 (Samhd1), transcript variant 1, mRNA	ENSMUSG00000027639	318.007	8.31292	2.41887	0.32382	7.46978	8.03281e-14	7.25852e-12
XM_030254969.2	PREDICTED: inositol 1,4,5-trisphosphate 3-kinase B (Itpkb), transcript variant X1, mRNA	ENSMUSG00000038855	316.496	8.30604	-2.68391	0.728747	-3.68291	0.000230589	0.00313007
NM_027154.5	transmembrane BAX inhibitor motif containing 1 (Tmbim1), mRNA	ENSMUSG00000006301	315.745	8.30261	1.219	0.227855	5.34989	8.80076e-08	3.1255e-06
NM_019963.2	signal transducer and activator of transcription 2 (Stat2), mRNA	ENSMUSG00000040033	315.74	8.30259	1.33467	0.230086	5.80073	6.60284e-09	2.98319e-07
NM_008871.2	serine (or cysteine) peptidase inhibitor, clade E, member 1 (Serpine1), mRNA	ENSMUSG00000037411	314.955	8.299	3.92997	0.445069	8.83003	1.04652e-18	1.61428e-16
NM_010479.2	heat shock protein 1A (Hspa1a), mRNA	ENSMUSG00000091971	314.723	8.29794	2.4019	0.552272	4.34913	1.3668e-05	0.000283978
XR_879501.4	PREDICTED: jumonji domain containing 6 (Jmjd6), transcript variant X1, misc_RNA	ENSMUSG00000056962	311.573	8.28343	1.73567	0.420276	4.12984	3.63015e-05	0.000643857
NM_001253822.1	Iroquois related homeobox 3 (Irx3), transcript variant 1, mRNA	ENSMUSG00000031734	310.987	8.28071	3.83484	0.331485	11.5686	5.94109e-31	2.74928e-28
NM_001081383.2	lysine (K)-specific methyltransferase 2C (Kmt2c), mRNA	ENSMUSG00000038056	310.808	8.27988	-1.15998	0.272107	-4.26297	2.01732e-05	0.000394449
NM_146078.3	ubiquitin protein ligase E3 component n-recognin 2 (Ubr2), transcript variant 1, mRNA	ENSMUSG00000023977	310.204	8.27707	-1.10794	0.24999	-4.43194	9.33908e-06	0.000206094
NM_172054.4	thioredoxin domain containing 9 (Txndc9), mRNA	ENSMUSG00000058407	309.349	8.27309	1.79022	0.622024	2.87805	0.00400137	0.0308699
NM_008536.4	transmembrane 4 superfamily member 1 (Tm4sf1), transcript variant 1, mRNA	ENSMUSG00000027800	308.39	8.26861	1.30294	0.288599	4.51472	6.34006e-06	0.000146447
Gm4184	pseudogene		308.272	8.26806	1.16024	0.209889	5.52788	3.24121e-08	1.27568e-06
NM_008176.3	chemokine (C-X-C motif) ligand 1 (Cxcl1), mRNA	ENSMUSG00000029380	308.024	8.2669	4.74178	0.868795	5.45788	4.81862e-08	1.81244e-06
NM_175035.5	GTPase, IMAP family member 5 (Gimap5), mRNA	ENSMUSG00000043505	306.606	8.26024	2.02889	0.304912	6.65402	2.85189e-11	1.87654e-09
NM_027514.2	poliovirus receptor (Pvr), mRNA	ENSMUSG00000040511	305.638	8.25568	2.76992	0.250398	11.0621	1.91665e-28	6.80679e-26
NM_008842.4	proviral integration site 1 (Pim1), transcript variant 1, mRNA	ENSMUSG00000024014	305.598	8.25549	2.51604	0.275777	9.12347	7.27541e-20	1.26253e-17
XM_006525194.5	PREDICTED: general transcription factor IIF, polypeptide 1 (Gtf2f1), transcript variant X1, mRNA	ENSMUSG00000002658	305.371	8.25442	1.10993	0.13642	8.13612	4.08144e-16	5.02643e-14
NM_025898.4	N-ethylmaleimide sensitive fusion protein attachment protein alpha (Napa), mRNA	ENSMUSG00000006024	304.65	8.25101	2.16584	0.677323	3.19764	0.00138558	0.0132162
NM_001081636.1	cyclin D3 (Ccnd3), transcript variant 3, mRNA	ENSMUSG00000034165	299.511	8.22646	-5.11518	1.46848	-3.48331	0.000495254	0.00585374
NM_178886.3	low density lipoprotein receptor class A domain containing 3 (Ldlrad3), transcript variant 1, mRNA	ENSMUSG00000048058	297.068	8.21465	-1.41087	0.450579	-3.13124	0.00174069	0.0160224
XM_017317970.3	PREDICTED: solute carrier family 66 member 2 (Slc66a2), transcript variant X7, mRNA	ENSMUSG00000034006	295.39	8.20648	2.33392	0.866319	2.69407	0.00705854	0.0473598
NM_052973.2	striatin, calmodulin binding protein 3 (Strn3), transcript variant 1, mRNA	ENSMUSG00000020954	294.538	8.20231	-11.6232	1.03612	-11.218	3.32811e-29	1.21008e-26
XM_006509556.4	PREDICTED: FK506 binding protein 8 (Fkbp8), transcript variant X1, mRNA	ENSMUSG00000019428	292.956	8.19454	-3.56093	1.01846	-3.4964	0.000471584	0.00563772
XM_030252611.2	PREDICTED: toll-like receptor 2 (Tlr2), transcript variant X2, mRNA	ENSMUSG00000027995	292.829	8.19391	1.67729	0.284994	5.88536	3.9719e-09	1.83803e-07
NR_074087.1	TLE family member 5, transcriptional modulator (Tle5), transcript variant 3, non-coding RNA	ENSMUSG00000054452	292.749	8.19352	-4.1838	1.09865	-3.80813	0.000140023	0.00205605
NM_016861.4	PDZ and LIM domain 1 (elfin) (Pdlim1), mRNA	ENSMUSG00000055044	289.681	8.17832	3.90468	0.39052	9.99867	1.5446e-23	3.62886e-21
XR_877675.4	PREDICTED: F-box and WD-40 domain protein 4 (Fbxw4), transcript variant X3, misc_RNA	ENSMUSG00000040913	289.458	8.17721	-1.20064	0.291745	-4.11537	3.86556e-05	0.000676961
XM_036165713.1	PREDICTED: a disintegrin-like and metallopeptidase (reprolysin type) with thrombospondin type 1 motif, 9 (Adamts9), transcript variant X1, mRNA	ENSMUSG00000030022	289.311	8.17648	5.26115	0.443107	11.8733	1.62872e-32	9.21194e-30
XM_006515585.1	PREDICTED: placental growth factor (Pgf), transcript variant X1, mRNA	ENSMUSG00000004791	288.197	8.17091	5.13479	0.454396	11.3003	1.3084e-29	5.25804e-27
NM_001024602.3	centrosomal protein 170B (Cep170b), mRNA	ENSMUSG00000072825	287.84	8.16912	-3.86654	1.04663	-3.69426	0.000220526	0.00301222
NM_207176.3	testin LIM domain protein (Tes), mRNA	ENSMUSG00000029552	287.107	8.16545	1.099	0.106165	10.3518	4.10538e-25	1.11952e-22
NM_008256.4	3-hydroxy-3-methylglutaryl-Coenzyme A synthase 2 (Hmgcs2), mRNA; nuclear gene for mitochondrial product	ENSMUSG00000027875	286.935	8.16458	-3.4642	0.373215	-9.28206	1.66237e-20	2.98659e-18
NM_017372.3	lysozyme 2 (Lyz2), mRNA	ENSMUSG00000069516	284.519	8.15238	-1.07911	0.397598	-2.71408	0.00664605	0.0454385
NR_168637.1	huntingtin interacting protein 1 (Hip1), transcript variant 3, non-coding RNA	ENSMUSG00000039959	283.841	8.14894	-1.63647	0.273529	-5.98281	2.19316e-09	1.06667e-07
NM_080638.3	major vault protein (Mvp), mRNA	ENSMUSG00000030681	283.43	8.14685	1.93089	0.221419	8.72054	2.76878e-18	4.06559e-16
NM_008381.4	inhibin beta-B (Inhbb), mRNA	ENSMUSG00000037035	283.201	8.14568	5.01428	0.531862	9.42779	4.18815e-21	7.99466e-19
Gm19249	pseudogene		281.904	8.13906	1.17094	0.178026	6.57735	4.78891e-11	3.02961e-09
NM_013652.2	chemokine (C-C motif) ligand 4 (Ccl4), mRNA	ENSMUSG00000018930	281.668	8.13785	3.64772	0.517996	7.04199	1.8952e-12	1.42569e-10
Gm7729	pseudogene		279.974	8.12915	1.10304	0.218702	5.04361	4.56835e-07	1.38694e-05
NM_177782.3	phosphatidylinositol-3,4,5-trisphosphate-dependent Rac exchange factor 1 (Prex1), mRNA	ENSMUSG00000039621	279.582	8.12713	-2.08543	0.514945	-4.04981	5.126e-05	0.000859267
NM_177909.5	solute carrier family 9 (sodium/hydrogen exchanger), member 9 (Slc9a9), mRNA	ENSMUSG00000031129	278.108	8.1195	-1.13014	0.274061	-4.12368	3.72873e-05	0.000660573
XR_003954321.2	PREDICTED: dedicator of cytokinesis 10 (Dock10), transcript variant X16, misc_RNA	ENSMUSG00000038608	278.006	8.11897	-2.54524	0.270717	-9.40185	5.3612e-21	9.98426e-19
XM_011249385.4	PREDICTED: guanylate binding protein 6 (Gbp6), transcript variant X1, mRNA	ENSMUSG00000104713	277.731	8.11755	4.17328	0.428674	9.73531	2.13173e-22	4.71792e-20
NM_013653.3	chemokine (C-C motif) ligand 5 (Ccl5), mRNA	ENSMUSG00000035042	276.711	8.11223	2.87382	0.355346	8.08739	6.09563e-16	7.27237e-14
XM_006496675.4	PREDICTED: interferon activated gene 204 (Ifi204), transcript variant X1, mRNA	ENSMUSG00000073489	276.514	8.11121	2.96694	0.600419	4.94145	7.75428e-07	2.26416e-05
NM_001363356.1	CCR4-NOT transcription complex, subunit 6 (Cnot6), transcript variant 3, mRNA	ENSMUSG00000020362	276.068	8.10888	-1.31911	0.27181	-4.85304	1.21583e-06	3.40054e-05
NM_027299.5	delta(4)-desaturase, sphingolipid 2 (Degs2), transcript variant 1, mRNA	ENSMUSG00000021263	274.092	8.09852	-2.3153	0.271126	-8.53958	1.34708e-17	1.85327e-15
XM_006525481.5	PREDICTED: small integral membrane protein 3 (Smim3), transcript variant X1, mRNA	ENSMUSG00000038059	273.381	8.09477	1.89079	0.246089	7.68333	1.55009e-14	1.56764e-12
NM_019923.4	inositol 1,4,5-triphosphate receptor 2 (Itpr2), transcript variant 1, mRNA	ENSMUSG00000030287	272.553	8.09039	-1.02221	0.315756	-3.23735	0.00120646	0.0118178
NM_001169153.1	CD300 molecule like family member F (Cd300lf), transcript variant 1, mRNA	ENSMUSG00000047798	271.983	8.08737	5.09871	0.67242	7.58262	3.3864e-14	3.2694e-12
NM_001177753.1	6-phosphofructo-2-kinase/fructose-2,6-biphosphatase 3 (Pfkfb3), transcript variant 2, mRNA	ENSMUSG00000026773	271.638	8.08554	5.11124	0.987457	5.17616	2.26494e-07	7.29701e-06
NM_009780.2	complement component 4B (Chido blood group) (C4b), mRNA	ENSMUSG00000073418	271.296	8.08372	2.62311	0.432755	6.06142	1.34926e-09	6.93757e-08
NM_001190448.1	dopa decarboxylase (Ddc), transcript variant 1, mRNA	ENSMUSG00000020182	271.161	8.08301	-3.03279	0.401884	-7.54644	4.47305e-14	4.26012e-12
XM_036156148.1	PREDICTED: ferritin light polypeptide, pseudogene 2 (Ftl1-ps2), mRNA	ENSMUSG00000062382	270.912	8.08168	1.28602	0.210578	6.1071	1.01457e-09	5.37969e-08
NM_025980.2	Notch-regulated ankyrin repeat protein (Nrarp), mRNA	ENSMUSG00000078202	270.878	8.0815	1.19544	0.256482	4.66091	3.14819e-06	7.85556e-05
XM_006506398.5	PREDICTED: hematopoietic prostaglandin D synthase (Hpgds), transcript variant X1, mRNA	ENSMUSG00000029919	270.846	8.08133	-1.64009	0.357919	-4.58228	4.59931e-06	0.000109402
XM_036159225.1	PREDICTED: nucleoporin 50 (Nup50), transcript variant X1, mRNA	ENSMUSG00000016619	270.472	8.07934	1.02318	0.305658	3.34747	0.000815534	0.00871199
NM_010516.2	cellular communication network factor 1 (Ccn1), mRNA	ENSMUSG00000028195	270.109	8.0774	4.05531	0.568698	7.13087	9.97383e-13	7.77093e-11
NM_053214.2	myosin IF (Myo1f), mRNA	ENSMUSG00000024300	270.064	8.07716	-1.75959	0.492194	-3.57499	0.000350238	0.00439121
XM_006530746.5	PREDICTED: SMAD family member 1 (Smad1), transcript variant X1, mRNA	ENSMUSG00000031681	267.617	8.06403	1.80827	0.381853	4.73551	2.18503e-06	5.69599e-05
NM_001379260.1	CDP-diacylglycerol--inositol 3-phosphatidyltransferase (phosphatidylinositol synthase) (Cdipt), transcript variant 3, mRNA	ENSMUSG00000030682	267.415	8.06293	-4.88394	0.699777	-6.97928	2.96688e-12	2.21011e-10
NM_172588.2	serine incorporator 5 (Serinc5), mRNA	ENSMUSG00000021703	267.265	8.06213	-1.03655	0.251757	-4.11724	3.83435e-05	0.000673039
NM_023210.4	acidic (leucine-rich) nuclear phosphoprotein 32 family, member E (Anp32e), transcript variant 1, mRNA	ENSMUSG00000015749	266.671	8.05892	1.36862	0.283928	4.82028	1.43354e-06	3.97306e-05
NM_008013.4	fibrinogen-like protein 2 (Fgl2), mRNA	ENSMUSG00000039899	264.944	8.04954	2.27675	0.221677	10.2706	9.56414e-25	2.47549e-22
NM_024181.2	DnaJ heat shock protein family (Hsp40) member C10 (Dnajc10), mRNA	ENSMUSG00000027006	264.841	8.04898	-1.61869	0.515293	-3.14131	0.00168197	0.0155763
XM_006497955.5	PREDICTED: solute carrier family 25 (mitochondrial carrier, phosphate carrier), member 25 (Slc25a25), transcript variant X1, mRNA	ENSMUSG00000026819	263.225	8.04015	1.38736	0.188169	7.37295	1.66892e-13	1.46471e-11
Gm12966	pseudogene		262.985	8.03883	1.25434	0.342571	3.66156	0.000250685	0.00336694
NM_008036.2	FBJ osteosarcoma oncogene B (Fosb), transcript variant 1, mRNA	ENSMUSG00000003545	262.479	8.03606	2.99009	0.506205	5.90687	3.48676e-09	1.63332e-07
XM_030251510.2	PREDICTED: Rac/Cdc42 guanine nucleotide exchange factor (GEF) 6 (Arhgef6), transcript variant X7, mRNA	ENSMUSG00000031133	260.228	8.02363	-1.33319	0.14235	-9.36556	7.56452e-21	1.39178e-18
XM_036154165.1	PREDICTED: mitochondrial fission factor (Mff), transcript variant X1, mRNA	ENSMUSG00000026150	260.214	8.02356	-2.32378	0.868365	-2.67604	0.00744979	0.0493347
NM_026597.3	inka box actin regulator 1 (Inka1), mRNA	ENSMUSG00000042106	256.854	8.00481	-1.10902	0.391732	-2.83108	0.00463906	0.0346293
NM_001145799.1	cytotoxic T lymphocyte-associated protein 2 alpha (Ctla2a), transcript variant 2, mRNA	ENSMUSG00000044258	256.008	8.00005	3.24785	0.991129	3.27692	0.00104946	0.0105784
NM_177716.3	coiled-coil domain containing 184 (Ccdc184), mRNA	ENSMUSG00000029875	254.889	7.99373	2.12931	0.266677	7.98461	1.40971e-15	1.63089e-13
NM_133216.3	X-prolyl aminopeptidase (aminopeptidase P) 1, soluble (Xpnpep1), transcript variant 1, mRNA	ENSMUSG00000025027	254.355	7.9907	1.09437	0.322505	3.39334	0.000690471	0.00766293
XM_006539647.5	PREDICTED: POU domain, class 2, transcription factor 2 (Pou2f2), transcript variant X1, mRNA	ENSMUSG00000008496	253.834	7.98774	-1.73257	0.311978	-5.5535	2.80003e-08	1.11643e-06
NM_020561.2	sphingomyelin phosphodiesterase, acid-like 3A (Smpdl3a), mRNA	ENSMUSG00000019872	253.334	7.9849	-1.11573	0.19277	-5.78791	7.12675e-09	3.20096e-07
XR_004940109.1	PREDICTED: phosphoserine aminotransferase 1 (Psat1), transcript variant X1, misc_RNA	ENSMUSG00000024640	253.026	7.98314	1.07723	0.204161	5.27638	1.31759e-07	4.50133e-06
NM_017466.5	chemokine (C-C motif) receptor-like 2 (Ccrl2), transcript variant 1, mRNA	ENSMUSG00000043953	252.38	7.97945	2.78078	0.503846	5.51912	3.40711e-08	1.33753e-06
NM_001033374.3	steroid receptor associated and regulated protein (Srarp), mRNA	ENSMUSG00000070637	252.172	7.97826	-1.90751	0.59784	-3.19067	0.00141942	0.0134968
NM_010362.3	glutathione S-transferase omega 1 (Gsto1), mRNA	ENSMUSG00000025068	251.928	7.97687	1.16271	0.429384	2.70785	0.00677206	0.0460036
NM_008250.2	H2.0-like homeobox (Hlx), mRNA	ENSMUSG00000039377	251.815	7.97622	1.37096	0.27761	4.93842	7.87598e-07	2.29531e-05
NM_153566.2	yrdC domain containing (E.coli) (Yrdc), mRNA; nuclear gene for mitochondrial product	ENSMUSG00000028889	251.795	7.97611	1.67832	0.322995	5.19612	2.03488e-07	6.5976e-06
NM_001177544.2	H2A clustered histone 23 (H2ac23), mRNA	ENSMUSG00000094248	251.539	7.97464	1.22604	0.342853	3.57601	0.000348882	0.0043814
XM_036157976.1	PREDICTED: La ribonucleoprotein domain family, member 4B (Larp4b), transcript variant X3, mRNA	ENSMUSG00000033499	251.133	7.97231	-3.1685	0.919888	-3.44444	0.000572249	0.00660032
XM_036163995.1	PREDICTED: alkaline ceramidase 2 (Acer2), transcript variant X5, mRNA	ENSMUSG00000038007	250.217	7.96704	3.94622	0.633801	6.22627	4.77681e-10	2.643e-08
NR_003364.1	cDNA sequence BC018473 (BC018473), long non-coding RNA	ENSMUSG00000056032	248.705	7.95829	3.31903	0.64879	5.11573	3.12535e-07	9.8204e-06
XM_006534504.1	PREDICTED: helicase with zinc finger domain (Helz), transcript variant X1, mRNA	ENSMUSG00000020721	248.244	7.95562	-2.77805	0.928934	-2.99058	0.00278451	0.0231476
XR_004941291.1	PREDICTED: lamin A (Lmna), transcript variant X2, misc_RNA	ENSMUSG00000028063	246.335	7.94448	1.59453	0.472778	3.37268	0.000744392	0.00809442
NM_007536.2	B cell leukemia/lymphoma 2 related protein A1d (Bcl2a1d), mRNA	ENSMUSG00000099974	245.613	7.94024	1.19882	0.220052	5.44791	5.09665e-08	1.90762e-06
NM_007925.4	elastin (Eln), mRNA	ENSMUSG00000029675	245.148	7.93751	-2.16392	0.504302	-4.29091	1.77942e-05	0.000353361
NM_172845.3	a disintegrin-like and metallopeptidase (reprolysin type) with thrombospondin type 1 motif, 4 (Adamts4), mRNA	ENSMUSG00000006403	244.559	7.93404	1.6935	0.278912	6.07182	1.26466e-09	6.59131e-08
XM_030242131.2	PREDICTED: fibrillarin (Fbl), transcript variant X1, mRNA	ENSMUSG00000046865	244.508	7.93374	1.10859	0.28923	3.8329	0.00012664	0.00189043
NM_001360536.1	occludin (Ocln), transcript variant 2, mRNA	ENSMUSG00000021638	244.126	7.93148	-2.08762	0.448268	-4.65708	3.20721e-06	7.97676e-05
XM_036160911.1	PREDICTED: synaptopodin (Synpo), transcript variant X9, mRNA	ENSMUSG00000043079	243.957	7.93048	2.73938	0.404234	6.77672	1.22935e-11	8.49478e-10
NM_178185.2	H2A clustered histone 24 (H2ac24), mRNA	ENSMUSG00000094777	242.219	7.92017	1.23159	0.341339	3.60813	0.000308409	0.00397444
XR_004934144.1	PREDICTED: nucleobindin 2 (Nucb2), transcript variant X2, misc_RNA	ENSMUSG00000030659	241.385	7.91519	1.36864	0.266321	5.13905	2.76129e-07	8.74849e-06
NM_007918.3	eukaryotic translation initiation factor 4E binding protein 1 (Eif4ebp1), mRNA	ENSMUSG00000031490	238.744	7.89932	1.46902	0.236916	6.20059	5.62505e-10	3.06786e-08
XM_011240977.4	PREDICTED: trinucleotide repeat containing 18 (Tnrc18), transcript variant X3, mRNA	ENSMUSG00000039477	237.886	7.89413	-1.08209	0.270453	-4.00101	6.30725e-05	0.00103235
NM_001359292.1	cell division cycle associated 4 (Cdca4), transcript variant 3, mRNA	ENSMUSG00000047832	235.286	7.87827	1.03045	0.136744	7.53563	4.85998e-14	4.55317e-12
NM_010478.2	heat shock protein 1B (Hspa1b), mRNA	ENSMUSG00000090877	233.125	7.86496	2.20977	0.449646	4.91446	8.90263e-07	2.5507e-05
XM_011240009.3	PREDICTED: extracellular matrix protein 1 (Ecm1), transcript variant X3, mRNA	ENSMUSG00000028108	232.938	7.8638	1.46169	0.220084	6.64152	3.10474e-11	2.009e-09
NM_001330555.1	transformer 2 beta (Tra2b), transcript variant 3, mRNA	ENSMUSG00000022858	232.743	7.86259	2.85218	0.673942	4.23209	2.31534e-05	0.000443077
NM_172429.3	survival motor neuron domain containing 1 (Smndc1), transcript variant 1, mRNA	ENSMUSG00000025024	232.515	7.86118	1.74265	0.384063	4.53739	5.69535e-06	0.000133191
NM_011337.2	chemokine (C-C motif) ligand 3 (Ccl3), mRNA	ENSMUSG00000000982	232.447	7.86076	4.1591	0.894308	4.65064	3.30911e-06	8.19017e-05
NM_001359034.1	guanine nucleotide binding protein, alpha 13 (Gna13), transcript variant 2, mRNA	ENSMUSG00000020611	232.378	7.86033	4.6094	0.818443	5.63192	1.78212e-08	7.39532e-07
NM_001177601.1	RIKEN cDNA 0610010K14 gene (0610010K14Rik), transcript variant 1, mRNA	ENSMUSG00000020831	231.82	7.85686	1.88216	0.452227	4.16197	3.15519e-05	0.000577733
XM_030245756.2	PREDICTED: phosphoribosyl pyrophosphate synthetase-associated protein 2 (Prpsap2), transcript variant X3, mRNA	ENSMUSG00000020528	230.287	7.84729	-1.49779	0.259812	-5.76492	8.16977e-09	3.60579e-07
NM_001313718.1	acyl-CoA thioesterase 9 (Acot9), transcript variant 2, mRNA; nuclear gene for mitochondrial product	ENSMUSG00000025287	229.351	7.84141	1.55156	0.187523	8.27394	1.29601e-16	1.62224e-14
NM_025976.5	bifunctional apoptosis regulator (Bfar), transcript variant 1, mRNA	ENSMUSG00000022684	228.44	7.83567	-1.06232	0.380509	-2.79183	0.00524104	0.0380218
XM_006509976.4	PREDICTED: dynamin 2 (Dnm2), transcript variant X5, mRNA	ENSMUSG00000033335	228.385	7.83532	-2.22353	0.791991	-2.80752	0.00499238	0.0365829
NM_015774.3	endoplasmic reticulum oxidoreductase 1 alpha (Ero1a), mRNA	ENSMUSG00000021831	227.456	7.82944	1.71297	0.211567	8.09657	5.65303e-16	6.79743e-14
NM_021704.3	chemokine (C-X-C motif) ligand 12 (Cxcl12), transcript variant 1, mRNA	ENSMUSG00000061353	227.221	7.82795	-2.84842	0.378131	-7.53289	4.96285e-14	4.6212e-12
XM_006537558.4	PREDICTED: trimethylguanosine synthase 1 (Tgs1), transcript variant X1, mRNA	ENSMUSG00000028233	227.07	7.827	-1.08067	0.364419	-2.96546	0.00302227	0.0247072
NM_001271490.1	transcription factor E3 (Tfe3), transcript variant 5, mRNA	ENSMUSG00000000134	226.402	7.82274	-4.69044	0.253846	-18.4775	3.13552e-76	9.57649e-73
XM_011240313.2	PREDICTED: ubiquitin specific peptidase 53 (Usp53), transcript variant X1, mRNA	ENSMUSG00000039701	225.827	7.81908	-1.40785	0.159768	-8.81187	1.23079e-18	1.86093e-16
NM_012037.2	vesicle amine transport 1 (Vat1), mRNA	ENSMUSG00000034993	225.686	7.81817	1.04272	0.284632	3.66339	0.000248898	0.00334588
NM_001081201.2	dpy-19-like 4 (C. elegans) (Dpy19l4), mRNA	ENSMUSG00000045205	224.976	7.81363	-1.15032	0.353569	-3.25347	0.00114005	0.0112831
Gm11488	pseudogene		223.921	7.80684	1.39734	0.451992	3.09152	0.00199135	0.017765
Gm12033	pseudogene		222.859	7.79999	1.68972	0.242411	6.97049	3.15841e-12	2.34136e-10
NM_011888.3	chemokine (C-C motif) ligand 19 (Ccl19), mRNA	ENSMUSG00000071005	222.65	7.79864	1.32765	0.479543	2.76857	0.00563027	0.0401588
NM_026554.4	nuclear cap binding protein subunit 2 (Ncbp2), mRNA	ENSMUSG00000022774	222.405	7.79704	-1.59016	0.409735	-3.88094	0.000104052	0.00158738
NM_007553.3	bone morphogenetic protein 2 (Bmp2), mRNA	ENSMUSG00000027358	221.839	7.79337	2.73714	0.76312	3.58678	0.000334785	0.00425333
NM_001139519.1	Z-DNA binding protein 1 (Zbp1), transcript variant 2, mRNA	ENSMUSG00000027514	220.678	7.7858	5.0613	1.19753	4.22646	2.37398e-05	0.000452033
XM_030243710.2	PREDICTED: ankyrin repeat domain 37 (Ankrd37), transcript variant X1, mRNA	ENSMUSG00000050914	220.397	7.78396	2.7821	0.392212	7.09335	1.30899e-12	9.99481e-11
NM_016690.4	heterogeneous nuclear ribonucleoprotein D-like (Hnrnpdl), transcript variant 1, mRNA	ENSMUSG00000029328	220.217	7.78278	3.41718	1.11552	3.06332	0.00218897	0.0192003
NM_153142.3	solute carrier family 35, member E4 (Slc35e4), mRNA	ENSMUSG00000048807	220.187	7.78259	1.08352	0.288348	3.75768	0.000171497	0.00243849
XM_036158581.1	PREDICTED: PHD finger protein 11B (Phf11b), transcript variant X2, mRNA	ENSMUSG00000091649	219.715	7.77949	2.16687	0.710783	3.04857	0.00229936	0.0199337
XM_036165469.1	PREDICTED: lysine (K)-specific methyltransferase 2E (Kmt2e), transcript variant X5, mRNA	ENSMUSG00000029004	219.228	7.77629	-4.3254	1.30684	-3.30981	0.000933601	0.0096789
Gm13394	pseudogene		218.78	7.77334	1.65544	0.222501	7.44015	1.00568e-13	9.034e-12
NM_027106.4	arginine vasopressin-induced 1 (Avpi1), mRNA	ENSMUSG00000018821	218.707	7.77286	1.57841	0.25029	6.30631	2.85773e-10	1.63447e-08
XM_006521080.5	PREDICTED: sterile alpha motif domain containing 12 (Samd12), transcript variant X1, mRNA	ENSMUSG00000058656	218.392	7.77078	-1.23659	0.259717	-4.76131	1.92342e-06	5.11718e-05
NM_008152.3	G-protein coupled receptor 65 (Gpr65), mRNA	ENSMUSG00000021886	218.118	7.76897	3.74766	0.357203	10.4917	9.43325e-26	2.82461e-23
NM_001356323.1	ERBB receptor feedback inhibitor 1 (Errfi1), transcript variant 1, mRNA	ENSMUSG00000028967	217.508	7.76493	1.21699	0.182161	6.68083	2.3759e-11	1.59834e-09
NM_001278256.1	prion protein (Prnp), transcript variant 2, mRNA	ENSMUSG00000079037	215.916	7.75433	-4.95652	1.14983	-4.31065	1.62776e-05	0.000328369
XM_036163222.1	PREDICTED: asparagine-linked glycosylation 5 (dolichyl-phosphate beta-glucosyltransferase) (Alg5), transcript variant X1, mRNA	ENSMUSG00000036632	215.584	7.75211	1.22823	0.228926	5.3652	8.08609e-08	2.88868e-06
XM_006524795.4	PREDICTED: ATPase, H+ transporting, lysosomal V1 subunit G2 (Atp6v1g2), transcript variant X1, mRNA	ENSMUSG00000024403	215.28	7.75007	-4.17781	1.25623	-3.32567	0.00088206	0.00928321
NM_028601.3	zinc finger, MIZ-type containing 2 (Zmiz2), transcript variant 1, mRNA	ENSMUSG00000041164	214.516	7.74494	-4.70264	1.37658	-3.41617	0.000635089	0.00715224
NM_026672.3	glutathione S-transferase, mu 7 (Gstm7), transcript variant 1, mRNA	ENSMUSG00000004035	213.512	7.73817	-1.72246	0.419416	-4.10682	4.01142e-05	0.0006985
XM_011242352.4	PREDICTED: baculoviral IAP repeat-containing 3 (Birc3), transcript variant X5, mRNA	ENSMUSG00000032000	212.55	7.73166	2.35463	0.325457	7.23484	4.66095e-13	3.88947e-11
XM_006512589.5	PREDICTED: protein-L-isoaspartate (D-aspartate) O-methyltransferase 1 (Pcmt1), transcript variant X1, mRNA	ENSMUSG00000019795	210.732	7.71926	1.36622	0.318153	4.29422	1.75308e-05	0.000349039
XR_001785490.3	PREDICTED: phosphodiesterase 3B, cGMP-inhibited (Pde3b), transcript variant X3, misc_RNA	ENSMUSG00000030671	209.07	7.70784	-1.16011	0.428669	-2.7063	0.00680377	0.0461369
NM_172806.3	BTB (POZ) domain containing 7 (Btbd7), transcript variant 1, mRNA	ENSMUSG00000041702	208.845	7.70629	-1.00595	0.205039	-4.90614	9.28869e-07	2.64148e-05
XM_030251381.2	PREDICTED: non-POU-domain-containing, octamer binding protein (Nono), transcript variant X1, mRNA	ENSMUSG00000031311	208.217	7.70194	2.99577	1.08848	2.75225	0.00591866	0.0416323
NM_007903.5	endothelin 3 (Edn3), mRNA	ENSMUSG00000027524	208.164	7.70158	-4.30385	0.455433	-9.45002	3.38754e-21	6.6322e-19
NM_027450.3	GLI pathogenesis-related 2 (Glipr2), mRNA	ENSMUSG00000028480	206.968	7.69326	3.2724	0.364971	8.9662	3.06931e-19	4.93384e-17
NM_133242.3	RNA binding motif protein 39 (Rbm39), transcript variant 1, mRNA	ENSMUSG00000027620	206.735	7.69164	2.82233	0.869418	3.24623	0.00116946	0.0115218
XM_036158096.1	PREDICTED: B double prime 1, subunit of RNA polymerase III transcription initiation factor IIIB (Bdp1), transcript variant X6, mRNA	ENSMUSG00000049658	206.373	7.68911	-1.00789	0.270909	-3.72041	0.000198902	0.00276633
[truncated: 1,130 more rows]
