# Supplementary material for: Immunopathology and Trypanosoma congolense parasite sequestration cause acute cerebral trypanosomiasis
Source: eLife. 2022 Jul 5;11:e77440. doi: 10.7554/eLife.77440 (PMC9307270; doi:10.7554/eLife.77440)
Supplement: Supplementary file 2. [file elife-77440-supp2.xlsx]

## Sheet: Input gene list for GSEA
Transcript ID	Gene Symbol	log2FoldChange	baseMean	lfcSE	stat	pvalue	padj
NM_025870.1	Swsap1	-0.798801	65.6035	0.299199	-2.6698	0.00758972	0.0499795
NM_001327821.1	Creb5	1.31716	91.6047	0.493258	2.67032	0.0075779	0.0499443
XM_006525698.4	Ppargc1b	-0.688973	128.744	0.258025	-2.67018	0.00758109	0.0499443
NM_023395.2	Wfdc1	0.408471	484.687	0.152955	2.67053	0.00757314	0.049935
XR_004938078.1	Dtnbp1	0.397939	338.886	0.148974	2.6712	0.00755802	0.0498568
NM_181418.3	Ushbp1	-2.08943	202.687	0.781792	-2.67262	0.00752614	0.049668
NM_133784.3	Wwtr1	0.512192	885.369	0.19159	2.67337	0.00750927	0.0495781
Gm6681	Gm6681	0.36878	175.864	0.137942	2.67345	0.00750758	0.0495781
NM_198599.2	Map6d1	-1.00492	62.1237	0.375848	-2.67375	0.00750078	0.0495649
NM_007789.3	Ncan	-0.806747	203.145	0.301572	-2.67514	0.00746976	0.0493813
XM_006523730.4	Psmb9	1.19217	919.781	0.445585	2.67551	0.00746155	0.0493483
NM_026384.3	Dgat2	0.664014	117.162	0.248166	2.67568	0.00745773	0.0493483
Gm6166	Gm6166	0.347585	125.821	0.129912	2.67555	0.00746074	0.0493483
XM_036154165.1	Mff	-2.32378	260.214	0.868365	-2.67604	0.00744979	0.0493347
NM_022420.2	Gprc5b	0.933264	156.372	0.34841	2.67863	0.0073923	0.0489752
XM_006498259.1	Nacc2	-0.693459	289.467	0.25882	-2.67931	0.00737737	0.0488975
NM_001359412.1	Dkc1	-1.42752	175.13	0.532767	-2.67944	0.0073745	0.0488975
NM_019765.5	Clip1	-0.868285	869.73	0.324024	-2.67969	0.007369	0.0488845
NM_001377115.1	Zfp825	-1.0546	22.0894	0.393348	-2.68109	0.00733825	0.0487016
NR_036616.1	Srsf9	-1.02272	25.1894	0.381319	-2.68205	0.00731727	0.0485835
Gm5835	Gm5835	0.483832	543.645	0.180361	2.68258	0.00730561	0.0485272
Gm7476	Gm7476	0.490619	363.189	0.18286	2.68304	0.00729572	0.0484825
NM_010559.3	Il6ra	1.19304	18.8341	0.444624	2.68326	0.0072908	0.048471
NM_009431.2	Ctr9	-0.790265	358.571	0.294491	-2.68349	0.00728578	0.048471
NM_001285933.1	Kctd9	-3.25953	45.9761	1.2147	-2.6834	0.00728781	0.048471
NM_178873.3	Adck2	-0.740959	85.5857	0.27604	-2.68425	0.00726935	0.0483916
Eif5al3-ps	Eif5al3-ps	0.929737	42.5817	0.345992	2.68716	0.00720619	0.047992
NM_021349.3	Tnfrsf13b	-1.21713	41.2728	0.452918	-2.6873	0.00720321	0.047992
NM_019388.3	Cd86	0.717499	381.912	0.266976	2.6875	0.00719889	0.0479852
Rpl17-ps4	Rpl17-ps4	0.575481	175.028	0.214073	2.68825	0.00718282	0.0478991
NM_011454.2	Serpinb6b	-2.00933	71.1949	0.747302	-2.68878	0.00717133	0.0478433
XM_011246728.1	Srbd1	-1.3303	58.0759	0.494703	-2.68908	0.0071649	0.0478213
NM_009811.4	Casp6	-0.694918	161.878	0.258381	-2.68951	0.00715576	0.0477812
NM_009702.3	Aqr	-0.90648	237.546	0.337007	-2.68979	0.00714962	0.0477611
NM_001285503.1	Nde1	-2.61605	116.016	0.9724	-2.6903	0.00713877	0.0477095
NM_001252193.1	Amz2	-1.3032	93.7817	0.484251	-2.69117	0.00712013	0.0476057
NM_001277230.1	Zbtb24	1.82622	68.1657	0.67851	2.69152	0.00711269	0.0475768
Gm16020	Gm16020	0.454089	77.1978	0.168673	2.69213	0.00709973	0.0475109
Rps2-ps6	Rps2-ps6	0.795476	17.284	0.295438	2.69253	0.00709111	0.0474741
XM_030254398.1	Cnot6l	-0.970808	447.186	0.360522	-2.69278	0.00708591	0.0474601
NM_001162921.2	Zc3h12c	0.797953	112.56	0.296275	2.69328	0.00707525	0.0474094
NM_028317.3	Skida1	-1.01575	35.3269	0.377106	-2.69355	0.00706958	0.0473922
NM_011437.1	Sox10	-0.76465	69.2715	0.283855	-2.6938	0.0070642	0.047377
XM_017317970.3	Slc66a2	2.33392	295.39	0.866319	2.69407	0.00705854	0.0473598
NM_010231.3	Fmo1	-2.96293	45.4994	1.09942	-2.69498	0.00703924	0.0472511
XR_004941971.1	Sgip1	-2.87958	144.685	1.0684	-2.69522	0.0070342	0.047238
NM_028444.1	Cavin3	0.915774	678.427	0.339714	2.69572	0.00702359	0.0471875
NM_007907.2	Eef2	0.360289	5552.17	0.133637	2.69602	0.00701735	0.047181
NM_134126.3	Ift140	-2.04916	32.8396	0.760098	-2.69592	0.00701954	0.047181
NM_145076.4	Trim24	-3.37149	99.5318	1.25049	-2.69612	0.00701518	0.047181
NM_133982.1	Rpp25	1.05706	19.0433	0.392006	2.69653	0.00700651	0.0471633
NM_001378777.1	Col9a3	-1.80535	23.4862	0.669522	-2.69648	0.00700763	0.0471633
XM_006539932.3	Mill2	-2.72153	106.254	1.00909	-2.69701	0.00699653	0.0471301
XR_877682.3	Dclre1a	-0.867984	32.0572	0.321735	-2.69782	0.00697944	0.0470503
XM_036161635.1	Vti1a	-1.13612	43.8686	0.421103	-2.69797	0.00697632	0.0470503
XM_006526697.5	Grk5	-1.34391	71.637	0.498167	-2.69772	0.00698161	0.0470503
XM_006527625.5	Gpr34	-4.04131	485.168	1.49787	-2.69803	0.00697505	0.0470503
NM_008948.2	Psmc3	0.42957	1425.78	0.15917	2.69882	0.00695853	0.0469778
NM_015786.3	H1f2	1.52558	60.0144	0.565065	2.69983	0.00693741	0.0468559
NM_013835.2	Ro60	-0.859241	510.091	0.318243	-2.69995	0.00693495	0.0468559
NM_001291143.1	Rabep1	-0.901417	475.536	0.333853	-2.70004	0.00693302	0.0468559
NM_022408.2	Ess2	-1.33737	68.2136	0.495134	-2.70103	0.00691255	0.04675
NM_030711.5	Erap1	0.657607	381.941	0.243448	2.70122	0.00690846	0.0467431
NR_027943.1	1110038B12Rik	0.928667	88.3419	0.343752	2.70156	0.00690158	0.0467172
NM_001166416.1	Med23	-1.05122	81.1631	0.389053	-2.70199	0.00689257	0.0466769
XM_006511459.4	Fbxo22	-0.721201	160.526	0.266891	-2.70223	0.00688759	0.0466639
NM_026576.4	Etaa1	-1.04495	54.0276	0.386331	-2.7048	0.00683459	0.0463253
XR_001785490.3	Pde3b	-1.16011	209.07	0.428669	-2.7063	0.00680377	0.0461369
NM_053147.3	Pcdhb22	0.858088	17.8741	0.317051	2.70647	0.00680036	0.0461343
XM_006517204.5	Tifab	-1.30541	56.273	0.482161	-2.70741	0.00678111	0.0460241
NM_175399.4	Exosc4	0.465628	182.494	0.171968	2.70764	0.00677634	0.0460122
NM_010362.3	Gsto1	1.16271	251.928	0.429384	2.70785	0.00677206	0.0460036
NM_001360843.1	Arsk	-1.10719	73.7695	0.408754	-2.70869	0.00675487	0.0459072
Gm4600	Gm4600	0.494782	250.12	0.182642	2.70903	0.00674792	0.0458805
XM_006516275.5	Rps6ka5	-1.17054	82.0281	0.432028	-2.70941	0.00674033	0.0458493
NM_001311109.1	Mkrn1	-0.239078	554.69	0.0881914	-2.7109	0.00671011	0.0456759
NM_009211.2	Smarcc1	-0.719361	329.342	0.265367	-2.71081	0.00671186	0.0456759
XM_011245060.4	Zfhx2	-1.08381	118.527	0.399763	-2.71114	0.00670528	0.0456759
XM_011245337.4	Cdh9	-3.34372	15.1566	1.23343	-2.71091	0.00670987	0.0456759
XM_030253443.2	Tesk2	-2.60102	29.9595	0.959167	-2.71175	0.006693	0.045629
NM_177151.4	Vps13b	-0.872617	134.755	0.321733	-2.71224	0.00668302	0.0455812
NM_029037.4	Pomk	-1.06286	44.886	0.391803	-2.71274	0.00667288	0.0455324
Gm5883	Gm5883	1.05542	14.2372	0.388983	2.71327	0.00666232	0.0454807
NM_194054.3	Rtn4	1.02624	1054.79	0.378168	2.71372	0.00665319	0.0454387
NM_008617.2	Mdh2	0.324424	1771.57	0.119537	2.71401	0.0066474	0.0454385
NM_009786.2	Cacybp	-0.31233	511.825	0.115086	-2.71387	0.00665019	0.0454385
NM_017372.3	Lyz2	-1.07911	284.519	0.397598	-2.71408	0.00664605	0.0454385
XM_006540127.5	Ppp1r13l	3.35332	67.7033	1.23519	2.71482	0.00663113	0.0453692
XM_030248958.1	Spint1	-2.98957	65.348	1.10111	-2.71505	0.00662667	0.045359
NM_029751.4	Rpl18a	0.49317	1651.24	0.181617	2.71544	0.00661876	0.0453252
NM_019732.2	Runx3	1.74243	39.1873	0.641544	2.71599	0.0066078	0.0452704
NM_023476.3	Tinagl1	0.773645	1210.24	0.284558	2.71876	0.00655278	0.0449336
NM_001359978.1	Sbno1	-0.533922	678.283	0.196395	-2.71861	0.0065557	0.0449336
NM_029658.1	Rflnb	-0.736354	895.595	0.270722	-2.71996	0.00652897	0.0448093
NM_025578.4	Mrps25	-1.01232	525.622	0.372202	-2.71982	0.00653167	0.0448093
NM_009808.4	Casp12	-1.04499	82.6446	0.384213	-2.71982	0.00653169	0.0448093
NM_001379529.1	Batf2	5.31458	189.763	1.95361	2.7204	0.00652038	0.044792
Gm30251	Gm30251	-1.23558	38.1585	0.454048	-2.72126	0.00650344	0.0446958
NM_026417.4	Yipf4	-0.464519	268.207	0.170679	-2.7216	0.00649675	0.0446699
NM_009665.5	Amd1	-0.469196	975.57	0.172389	-2.72173	0.00649408	0.0446699
XM_036156723.1	Bahcc1	-1.88735	19.8018	0.693322	-2.72218	0.00648526	0.0446311
NM_011124.4	Ccl21a	1.38502	340.328	0.508418	2.72418	0.00644623	0.0443942
NM_026737.3	Phf5a	0.662106	578.986	0.243056	2.72409	0.00644793	0.0443942
NM_007752.3	Cp	0.883163	429.997	0.324143	2.72461	0.00643781	0.0443645
XR_003950863.1	Ercc6	-0.974161	52.6886	0.357477	-2.7251	0.0064282	0.0443183
XM_006500245.5	Hspa12b	-1.45217	95.8835	0.532858	-2.72526	0.00642516	0.0443173
XM_006539899.5	Garre1	5.90562	143.261	2.16654	2.72583	0.00641397	0.0442602
NM_010749.7	M6pr	0.503559	1082.19	0.184735	2.72584	0.00641372	0.0442602
XR_003949348.2	Npm1	0.6024	795.12	0.220949	2.72642	0.00640251	0.044221
Dnajb6-ps	Dnajb6-ps	0.418976	511.94	0.153617	2.72741	0.00638336	0.0441087
Gm7253	Gm7253	0.752117	33.6631	0.275575	2.72926	0.00634758	0.0438814
Gm6308	Gm6308	1.93144	19.1549	0.707603	2.72955	0.00634208	0.0438632
NR_003363.2	Gm6548	0.41439	404.918	0.15181	2.72967	0.00633976	0.0438632
XM_006509963.4	Cbl	-0.299284	562.802	0.109644	-2.7296	0.00634108	0.0438632
NM_144861.2	Rprd1a	-0.956821	159.259	0.350513	-2.72978	0.00633771	0.0438632
NM_146221.4	Zfp426	-0.828905	66.2923	0.303532	-2.73086	0.00631691	0.0437684
NM_001177505.2	Zkscan7	-2.54832	17.1844	0.933131	-2.73093	0.00631557	0.0437684
NM_026435.5	Ufm1	0.865467	501.555	0.31688	2.73121	0.00631021	0.0437617
XM_036154252.1	Rspry1	-0.743226	116.859	0.272106	-2.73138	0.00630696	0.043759
NM_007572.2	C1qa	0.657459	11263.5	0.240624	2.73231	0.00628925	0.043656
NM_012058.3	Srp9	0.476998	559.133	0.174542	2.73286	0.00627871	0.0436097
XM_036163829.1	Pik3cd	-0.842108	224.312	0.308148	-2.73281	0.00627973	0.0436097
Gm46209	Gm46209	0.588474	151.479	0.215289	2.73341	0.00626821	0.0435775
XR_003948576.2	Mbd6	-0.571221	213.182	0.208982	-2.73335	0.00626938	0.0435775
XM_011238987.4	Optn	0.571231	46.8877	0.208797	2.73582	0.00622253	0.0432913
NM_028876.3	Tmed5	0.540786	327.169	0.197653	2.73604	0.0062183	0.0432815
NM_134058.3	Pelo	0.777259	250.104	0.284055	2.73629	0.00621356	0.0432683
NM_001159617.1	Pigp	-0.736209	95.0808	0.268941	-2.73744	0.00619194	0.0431374
Gm6863	Gm6863	0.311251	1136.76	0.113664	2.73834	0.00617494	0.0430386
Gm14539	Gm14539	0.383549	552.732	0.139996	2.73971	0.00614938	0.04288
XM_036164067.1	Man1c1	-0.928989	189.695	0.339019	-2.74023	0.00613969	0.042832
XM_036159201.1	Ly6e	2.98418	164.199	1.08887	2.74063	0.00613218	0.0427992
XM_036164379.1	Caap1	-0.839044	61.6296	0.306049	-2.74153	0.00611533	0.0427011
NM_026219.2	Uqcrb	0.375474	779.603	0.136922	2.74224	0.00610213	0.0426284
NM_008452.2	Klf2	0.972607	6586.46	0.354642	2.74251	0.00609725	0.0426138
Rpl35a-ps4	Rpl35a-ps4	0.437659	567.262	0.159577	2.74262	0.00609513	0.0426138
XM_006515630.4	Srsf5	-3.35984	136.62	1.2247	-2.74341	0.00608054	0.0425359
NM_001168525.1	Sgms1	-0.816759	873.998	0.297675	-2.74379	0.00607339	0.0425054
NM_016776.3	Mybbp1a	0.667769	356.177	0.243347	2.7441	0.00606777	0.0424855
NM_009424.3	Traf6	0.939553	136.411	0.342314	2.74471	0.00605648	0.0424259
Rps15a-ps3	Rps15a-ps3	0.743993	88.6853	0.271038	2.74498	0.00605148	0.0424103
Gm14150	Gm14150	0.715118	29.0831	0.260388	2.74635	0.00602618	0.0422702
XM_030247475.1	Zkscan8	-1.23293	72.0578	0.448957	-2.74622	0.00602871	0.0422702
NM_001109993.1	Tmem141	-0.645704	168.261	0.235074	-2.74682	0.00601769	0.0422317
Gm8242	Gm8242	0.967429	55.4649	0.352093	2.74765	0.00600239	0.0421437
NM_001204233.1	Spp1	1.9752	177.191	0.718687	2.74835	0.00598966	0.0420737
NM_025563.3	Borcs7	0.376252	214.18	0.136865	2.74907	0.00597638	0.0419996
NR_160726.1	C4a	3.11858	43.6164	1.13428	2.7494	0.00597051	0.0419777
XM_030251381.2	Nono	2.99577	208.217	1.08848	2.75225	0.00591866	0.0416323
NM_133680.3	Mfsd14b	-0.40921	256.204	0.148629	-2.75324	0.00590092	0.0415267
NM_028785.3	Dock8	-1.57259	147.501	0.57117	-2.75328	0.00590011	0.0415267
XM_006499113.5	Sema6d	-4.16949	76.7246	1.51432	-2.75336	0.00589863	0.0415267
NM_145532.3	Mall	1.28207	118.892	0.465481	2.75428	0.00588209	0.0414601
NM_001286713.1	Tsc2	-4.82762	185.524	1.75281	-2.75422	0.00588331	0.0414601
NM_008720.2	Npc1	-0.606409	595.174	0.22015	-2.75453	0.00587765	0.0414585
NM_001166480.2	Ssr4	1.53652	628.516	0.557547	2.75586	0.00585383	0.0413095
NM_001167994.1	Trmt2b	-0.587376	61.2534	0.213137	-2.75587	0.00585369	0.0413095
Gm6133	Gm6133	0.553232	97.9559	0.200675	2.75685	0.00583607	0.0412252
XM_036160723.1	Ptchd4	-1.19733	96.4446	0.434312	-2.75683	0.00583649	0.0412252
Gm12989	Gm12989	0.708818	118.519	0.257078	2.75721	0.00582966	0.0412152
NM_020006.2	Cdc42ep4	0.915884	971.288	0.332063	2.75817	0.00581264	0.0411138
XM_006540571.5	Ap3b2	-0.67953	290.823	0.246358	-2.7583	0.00581022	0.0411138
XM_011245033.4	Hmbox1	-0.640829	205.823	0.232295	-2.75868	0.00580345	0.0410869
NM_010357.3	Gsta4	-0.961323	199.236	0.348432	-2.759	0.00579788	0.0410665
Gm13961	Gm13961	-1.05884	16.8391	0.383742	-2.75924	0.00579361	0.0410553
NM_023175.1	Nit2	-0.573368	71.414	0.207718	-2.76032	0.00577445	0.0409386
XM_006529903.5	Cep350	-0.734502	233.938	0.266092	-2.76033	0.00577429	0.0409386
NM_019704.2	Tmem115	0.430428	198.524	0.155764	2.76334	0.00572127	0.0406023
NM_009075.2	Rpia	-0.42093	124.515	0.152328	-2.76332	0.0057217	0.0406023
XM_036154436.1	Gm45855	0.871904	15.8674	0.315479	2.76375	0.00571413	0.0405863
NM_001081134.2	Kcng1	-0.984472	35.4669	0.356182	-2.76396	0.00571051	0.0405794
NM_001167777.1	Asxl3	-1.14017	26.4049	0.4124	-2.76472	0.00569714	0.0405032
NM_001033205.3	Zfp575	-0.958244	19.4143	0.346524	-2.7653	0.00568697	0.0404498
Gm7464	Gm7464	-1.45425	36.8281	0.525857	-2.76548	0.00568396	0.0404498
NM_009952.2	Creb1	-1.85702	487.794	0.671507	-2.76545	0.00568438	0.0404498
XM_036163486.1	Rpl13-ps6	0.4991	321.108	0.18041	2.76648	0.00566652	0.0403608
NM_145836.2	Irf2bpl	-0.377394	1250.53	0.136331	-2.76822	0.00563643	0.0401754
NM_138741.1	Cavin2	-1.18027	965.636	0.426377	-2.76813	0.00563787	0.0401754
NM_011888.3	Ccl19	1.32765	222.65	0.479543	2.76857	0.00563027	0.0401588
NM_001285512.1	Cops2	1.03628	139.302	0.374062	2.77034	0.00559971	0.0399594
NM_025605.3	Lamtor1	-0.218435	1010.37	0.078788	-2.77244	0.00556386	0.0397221
Rpl35a-ps6	Rpl35a-ps6	0.42427	469.067	0.153011	2.7728	0.00555756	0.0396957
NM_007974.4	F2rl1	-2.75699	13.8762	0.994219	-2.77302	0.00555382	0.0396876
NM_015817.3	Plpp2	0.780745	59.1073	0.281411	2.7744	0.00553039	0.0395387
NM_008800.2	Pde1b	2.76808	50.6742	0.997661	2.77457	0.00552752	0.0395382
NM_009506.2	Vegfc	-1.26867	42.0693	0.457252	-2.77455	0.00552774	0.0395382
NM_029688.5	Srxn1	0.69594	64.1393	0.250748	2.77545	0.00551251	0.0394663
XM_006540276.3	Zfp524	-1.73217	60.2384	0.623909	-2.77632	0.00549786	0.0393799
NM_053119.3	Echs1	0.59676	315.62	0.214835	2.77777	0.00547342	0.0392232
NM_028457.2	Exo5	-0.944102	75.2649	0.339834	-2.77812	0.00546736	0.0391981
NR_028359.1	5830417I10Rik	-1.10074	139.312	0.396155	-2.77857	0.00545989	0.039163
XM_006524891.5	Ppp4r1	-3.88633	106.321	1.39861	-2.77872	0.0054574	0.039163
XM_006512321.3	Ttc21a	-2.44643	17.6472	0.880269	-2.77919	0.00544947	0.039125
NM_024214.2	Tomm20	0.426122	695.705	0.153259	2.78041	0.00542901	0.0389965
XM_036163730.1	Elavl4	-0.709762	318.889	0.255225	-2.78092	0.00542043	0.0389531
XM_011246978.4	Iigp1	-2.47762	99.543	0.890892	-2.78105	0.00541833	0.0389531
NM_011945.3	Map3k1	-0.952852	454.369	0.342571	-2.78148	0.00541123	0.0389237
Gm7392	Gm7392	0.604427	243.316	0.217084	2.78429	0.00536447	0.0386055
NM_001379421.1	Cirbp	-3.75446	58.0791	1.34823	-2.78474	0.00535711	0.0385707
NR_169011.1	Gm21104	1.6498	14.139	0.59237	2.78509	0.00535131	0.0385471
XM_030255019.2	LOC115490200	-0.900906	73.7539	0.323449	-2.78531	0.0053476	0.0385385
NM_011739.3	Ywhaq	-0.386815	1378.36	0.138804	-2.78678	0.00532342	0.0383845
XM_006537848.4	Ecpas	-0.55278	149.188	0.198344	-2.78698	0.00532015	0.0383845
XM_011245540.3	Mtss1	-0.627741	413.626	0.225258	-2.78676	0.00532371	0.0383845
XM_036157551.1	Hs1bp3	-0.533977	147.072	0.191572	-2.78734	0.0053143	0.0383822
NM_178622.5	Suds3	-0.787442	357.523	0.282517	-2.78724	0.00531585	0.0383822
NM_145144.1	Aif1l	-1.64215	114.293	0.589165	-2.78724	0.00531583	0.0383822
XM_006522705.5	Cluap1	-0.809694	73.1227	0.290421	-2.788	0.00530349	0.0383473
XM_006539180.4	Trnau1ap	0.572625	140.726	0.205375	2.7882	0.00530026	0.0383422
Amd-ps3	Amd-ps3	-0.449116	677.644	0.161055	-2.78859	0.00529384	0.0383138
NM_178446.4	Rbm47	0.947412	156.587	0.339636	2.78949	0.00527907	0.0382251
XM_036163245.1	Ap4b1	-1.73986	43.4549	0.623708	-2.78955	0.0052781	0.0382251
NM_019833.3	Dipk1b	0.835725	304.767	0.299465	2.79073	0.005259	0.0381159
XM_006517475.4	Lysmd3	-2.77026	66.6481	0.992438	-2.79137	0.00524862	0.0380587
NM_025976.5	Bfar	-1.06232	228.44	0.380509	-2.79183	0.00524104	0.0380218
NM_016774.3	Atp5b	0.248443	2989.35	0.0889664	2.79255	0.00522946	0.0379559
NM_025895.4	Med28	-0.469968	1068.94	0.1682	-2.79411	0.00520435	0.0377915
NM_001313967.1	Aldh6a1	-0.736785	120.737	0.263639	-2.79468	0.00519518	0.0377429
XM_017315260.3	Gtf2a1	-0.444319	263.33	0.158929	-2.79571	0.00517866	0.0376408
XM_030245892.2	Hid1	0.733254	333.313	0.262114	2.79746	0.00515062	0.0374548
NM_001374033.1	BC024063	-2.1878	15.3477	0.781526	-2.79939	0.0051199	0.0372491
XM_006496459.5	Serpine2	-0.549544	1527.65	0.196283	-2.79975	0.00511424	0.0372257
NM_012020.2	Foxl2	-0.871251	200.797	0.311164	-2.79997	0.00511074	0.037218
XR_004940675.1	Marchf7	1.02763	109.139	0.366951	2.80045	0.00510322	0.0371809
XM_006524777.4	Smoc2	-1.76798	27.3875	0.631287	-2.80059	0.00510097	0.0371809
NR_036469.2	Trp53cor1	-2.0795	17.029	0.742328	-2.80133	0.00508925	0.0371146
NM_024457.2	Rap1b	0.361	2034.46	0.128821	2.80234	0.00507339	0.0370166
NM_023402.2	Myl12b	-0.393913	1417.87	0.140552	-2.80261	0.00506909	0.0370029
NR_153764.1	Gng5-ps	0.353823	1535.11	0.126223	2.80316	0.00506047	0.0369577
Gm2676	Gm2676	-0.550205	60.1782	0.196141	-2.80516	0.00502923	0.0367471
XM_006524097.5	Slc37a1	2.68403	20.3054	0.956574	2.80588	0.00501792	0.036682
Gm6430	Gm6430	0.411186	519.454	0.146527	2.80622	0.00501261	0.0366607
Rps7-ps3	Rps7-ps3	0.436676	1070.95	0.15558	2.80677	0.00500414	0.0366302
XM_030244354.1	Map2k5	-0.64028	86.7499	0.22813	-2.80664	0.00500605	0.0366302
XM_006520886.4	Spryd3	0.745356	577.586	0.265504	2.80733	0.00499547	0.0365879
XM_006509976.4	Dnm2	-2.22353	228.385	0.791991	-2.80752	0.00499238	0.0365829
Gm4708	Gm4708	0.510319	148.273	0.18174	2.80796	0.00498562	0.0365573
XR_004934195.1	Fhip1b	-0.569001	74.4701	0.202633	-2.80804	0.00498438	0.0365573
NR_104378.1	Fbxl4	-0.893361	40.9507	0.318159	-2.8079	0.0049865	0.0365573
NM_008489.2	Lbp	-0.988759	76.2443	0.352101	-2.80817	0.00498241	0.0365573
NM_174990.4	Gimap4	1.61836	114.488	0.576037	2.80948	0.00496221	0.0364492
NM_019697.4	Kcnd2	-0.39076	409.682	0.139069	-2.80983	0.00495677	0.0364268
Gm12663	Gm12663	-0.58057	91.2504	0.206619	-2.80986	0.0049563	0.0364268
Rps13-ps5	Rps13-ps5	0.617888	115.072	0.21987	2.81025	0.00495036	0.0364147
NM_023374.4	Sdhb	0.614592	981.75	0.218667	2.81063	0.00494445	0.036397
NM_008889.2	Ppp1r14b	0.380572	476.305	0.135408	2.81056	0.00494557	0.036397
Gm5845	Gm5845	0.511192	45.0924	0.181822	2.8115	0.0049311	0.0363255
XM_006522904.5	Erg	0.68568	37.3607	0.243722	2.81336	0.00490263	0.0361333
XM_006513583.3	Timeless	1.61733	92.9797	0.574797	2.81374	0.00489682	0.0361079
NR_015388.2	Dlx6os1	-2.80768	10.9895	0.997518	-2.81467	0.00488274	0.0360214
XM_006521630.3	Tdg-ps	0.642799	28.5783	0.22836	2.81485	0.00487995	0.0360182
NM_011899.4	Srp54a	0.385425	158.513	0.136914	2.81509	0.00487631	0.0360088
NM_172599.4	Atg14	-0.504006	182.442	0.179014	-2.81545	0.00487086	0.0359859
Gm4217	Gm4217	1.35966	24.9492	0.482388	2.81859	0.00482351	0.0356534
NM_001081223.2	Rbbp8	0.827212	39.7714	0.293249	2.82085	0.0047896	0.0354198
NM_019741.3	Slc2a5	-1.61813	25.1477	0.573454	-2.82173	0.00477649	0.03534
XM_030251379.2	Acsl4	0.528735	729.429	0.187341	2.82231	0.0047679	0.0352935
XM_030247321.2	Parp8	-0.829445	57.4861	0.293854	-2.82265	0.00476292	0.0352738
XM_011245735.2	Rpap3	1.26301	161.938	0.44742	2.82288	0.00475939	0.0352648
Amd-ps4	Amd-ps4	-0.455234	570.219	0.161264	-2.82291	0.00475906	0.0352648
NM_033521.3	Laptm4b	0.528771	694.752	0.187239	2.82404	0.00474225	0.0351719
XM_006533481.1	Armc7	-0.677737	55.8624	0.23997	-2.82426	0.00473898	0.0351647
NM_010028.3	Ddx3x	0.756378	4265.58	0.267721	2.82525	0.00472439	0.0350735
NM_021511.2	Rrs1	0.544924	211.147	0.192864	2.82544	0.00472159	0.0350697
XM_030250945.1	Rbck1	-0.346112	684.911	0.122484	-2.82578	0.00471659	0.0350496
XM_006538763.5	Zbtb40	-0.991332	40.055	0.350721	-2.82656	0.00470516	0.0349817
XM_006510922.5	Aph1b	-1.25238	45.2019	0.442868	-2.82789	0.00468558	0.0348531
Cbx3-ps6	Cbx3-ps6	-0.360274	538.003	0.127378	-2.82838	0.00467843	0.0348296
NR_015470.1	2610203C22Rik	-3.13836	9.37617	1.10964	-2.82826	0.00468014	0.0348296
NM_001346640.1	Grm7	-1.46607	46.6021	0.518261	-2.82882	0.00467199	0.0348029
NM_025701.4	Trappc5	-0.545954	209.139	0.19298	-2.82907	0.00466831	0.0347925
XM_030251058.2	Plgrkt	0.682842	127.507	0.241269	2.83021	0.0046517	0.0346856
NM_009084.4	Rpl37a	0.50861	628.143	0.179667	2.83084	0.00464255	0.0346343
NR_040318.1	2500004C02Rik	-1.0476	28.1285	0.370039	-2.83105	0.00463962	0.0346293
NM_026597.3	Inka1	-1.10902	256.854	0.391732	-2.83108	0.00463906	0.0346293
XM_006535822.4	Fam126a	-0.816035	144.56	0.288186	-2.83163	0.00463117	0.0346001
XM_006508123.4	Rnf141	-0.527572	562.611	0.18629	-2.83199	0.00462588	0.0345775
NM_001206684.1	2610528A11Rik	-3.811	27.9371	1.34557	-2.83226	0.00462205	0.0345658
Gm6344	Gm6344	0.667569	89.2243	0.235649	2.83289	0.00461289	0.0345141
NM_026977.3	Cnppd1	0.842887	799.343	0.297477	2.83345	0.00460485	0.0344709
NM_001002239.3	Rpl17	0.724365	337.531	0.255645	2.83348	0.00460443	0.0344709
XR_004941292.1	St8sia4	-0.873568	444.714	0.308257	-2.8339	0.00459841	0.0344591
TrnM	TrnM	-1.14992	117.731	0.405777	-2.83387	0.00459875	0.0344591
Gm9701	Gm9701	0.417546	226.244	0.147289	2.83487	0.00458443	0.0343855
NM_010140.4	Epha3	-1.8222	15.7239	0.642768	-2.83492	0.00458376	0.0343855
XM_036154449.1	Gm34962	0.708069	332.657	0.249638	2.83639	0.00456273	0.0342579
NM_001160345.1	Svip	-0.87474	101.966	0.308401	-2.83637	0.00456293	0.0342579
NM_029823.2	Arxes2	-0.48279	164.742	0.17013	-2.83777	0.00454301	0.0341457
XM_030244384.1	Scaper	-0.899384	202.682	0.316937	-2.83773	0.00454351	0.0341457
Rpl3-ps1	Rpl3-ps1	0.34772	2555.9	0.12251	2.83831	0.00453536	0.034118
NM_178791.5	Vstm4	-1.13157	19.0786	0.398632	-2.83864	0.00453061	0.034099
XM_006523296.5	Mas1	-1.23477	24.8905	0.434963	-2.83879	0.00452849	0.034099
Gm18078	Gm18078	0.70769	27.4041	0.248842	2.84393	0.00445609	0.0335713
NM_010531.2	Il18bp	4.28285	178.708	1.50542	2.84495	0.00444186	0.0334805
NR_165298.1	Gm14541	0.328426	319.499	0.115386	2.84632	0.00442274	0.0333529
NR_165793.2	B4galt1	0.788685	780.625	0.276966	2.84759	0.00440522	0.0332372
NM_011695.2	Vdac2	0.371145	1371.67	0.130298	2.84844	0.00439336	0.0331774
NM_009233.3	Sox1	-0.626086	57.8882	0.219806	-2.84836	0.00439457	0.0331774
NM_001360036.1	Cyrib	-0.683556	169.227	0.23996	-2.84863	0.00439081	0.0331774
NM_001364133.1	Taok1	-0.82972	868.614	0.291302	-2.84832	0.00439512	0.0331774
XM_030254788.1	Rfc3	0.912056	44.7538	0.320091	2.84936	0.00438067	0.0331338
XM_006509752.4	B3gnt3	0.798324	43.4879	0.280142	2.84971	0.00437586	0.0331139
NM_001048167.1	Map6	-1.30521	71.4375	0.457918	-2.85031	0.00436761	0.0330678
XR_004939188.1	Slc20a1	0.753819	79.2623	0.264429	2.85074	0.00436173	0.0330397
NM_001381858.1	Fam53b	-0.826112	253.259	0.289617	-2.85243	0.00433862	0.0328809
NM_173761.3	Ythdf1	0.642048	637.719	0.22494	2.85431	0.00431309	0.0327036
NM_001082485.1	Zfp266	-0.993105	143.102	0.347728	-2.85598	0.00429037	0.0325476
NM_011967.3	Psma5	0.518447	275.378	0.181471	2.85691	0.00427789	0.032469
NM_001355636.1	Tns2	2.25409	76.8339	0.788863	2.85739	0.00427134	0.0324486
NR_033642.1	Gm3230	-1.14213	23.786	0.399729	-2.85727	0.00427307	0.0324486
NM_010207.2	Fgfr2	-1.037	89.311	0.362846	-2.85797	0.00426366	0.0324093
XM_006515418.3	Mta1	3.25186	93.129	1.13747	2.85885	0.00425182	0.0323354
NM_025334.3	Txndc12	0.418198	371.165	0.146275	2.85899	0.00424988	0.0323354
Gm5497	Gm5497	0.657789	31.029	0.230032	2.85955	0.00424243	0.0322963
NM_001177881.1	Mfap3l	-0.759133	51.1227	0.265473	-2.85955	0.00424244	0.0322963
NM_198322.3	Zfp273	-2.42476	10.7313	0.847894	-2.85975	0.00423979	0.0322963
NM_001316711.1	Nkiras1	0.293222	569.756	0.102499	2.86072	0.00422674	0.0322249
NM_175152.4	Thap3	-0.809263	117.059	0.282736	-2.86226	0.00420632	0.0320977
XR_001780061.3	Ttc19	-0.852326	108.984	0.297794	-2.86214	0.00420796	0.0320977
NM_001310607.1	Cog4	-2.53008	52.0583	0.883849	-2.86257	0.00420225	0.0320863
NM_028923.3	Gle1	-1.27589	162.29	0.445597	-2.86332	0.00419228	0.0320262
XM_006522076.4	Nrros	1.09177	45.6548	0.381272	2.86349	0.00419004	0.0320251
Rpl10-ps6	Rpl10-ps6	0.493949	1266.86	0.172461	2.86412	0.00418168	0.03198
XM_006506720.5	Nat8f4	-2.49292	14.4326	0.870404	-2.86409	0.00418204	0.03198
NM_020581.2	Angptl4	1.52807	176.28	0.533193	2.86589	0.00415835	0.0318306
NM_010243.3	Fut9	-0.92436	401.739	0.322524	-2.86602	0.00415673	0.0318306
NM_001007581.1	Trp53rka	-0.557284	171.828	0.194427	-2.86629	0.00415315	0.0318228
NM_145838.1	St8sia6	0.57339	119.08	0.200006	2.86686	0.00414569	0.0317815
Gm11793	Gm11793	0.911016	35.4364	0.317662	2.86788	0.00413233	0.031695
NM_019449.2	Unc93b1	-0.735456	45.5624	0.256337	-2.8691	0.0041164	0.0315887
NM_001374599.1	Gm10033	-1.55359	35.8516	0.541398	-2.86959	0.00411006	0.0315559
XM_006530476.4	Morn3	2.72072	21.7447	0.947606	2.87115	0.00408985	0.0314165
Gm7808	Gm7808	0.495558	397.281	0.172474	2.87324	0.00406289	0.0312252
Gm10689	Gm10689	0.371585	490.093	0.129323	2.87331	0.00406202	0.0312252
Gm9712	Gm9712	0.61058	96.9201	0.212469	2.87374	0.00405643	0.0312069
XR_003948582.1	Ap3d1	-0.417259	929.461	0.145186	-2.87397	0.00405347	0.0311999
XM_036165452.1	Ociad1	-1.80819	16.0636	0.62869	-2.87613	0.00402582	0.0310027
NM_025864.4	Pacc1	-0.941374	137.966	0.32721	-2.87697	0.00401514	0.0309361
NM_172054.4	Txndc9	1.79022	309.349	0.622024	2.87805	0.00400137	0.0308699
XM_036152470.1	Nop58	0.683489	408.301	0.237497	2.87789	0.00400347	0.0308699
NM_021273.4	Ckb	-0.457282	6095.41	0.1589	-2.8778	0.00400454	0.0308699
NM_001024135.2	Kbtbd7	-0.543138	152.388	0.188727	-2.8779	0.00400326	0.0308699
Rpl13-ps3	Rpl13-ps3	0.435931	404.899	0.151368	2.87993	0.0039776	0.0307243
NM_027497.3	Epc1	-0.753893	157.489	0.261708	-2.88066	0.00396842	0.0306689
XR_001778479.2	Tmem192	0.693823	68.9994	0.240695	2.88258	0.00394431	0.030498
NM_024436.3	Rab22a	1.14037	162.238	0.395394	2.88413	0.00392491	0.0303721
NM_010306.3	Gnai3	0.53503	590.978	0.185514	2.88404	0.00392604	0.0303721
NM_028372.1	Mblac2	-1.00118	110.306	0.347126	-2.88419	0.00392427	0.0303721
XM_011243348.2	Cry1	0.864166	224.055	0.299504	2.88533	0.00391008	0.0302947
XM_030253842.2	Gale	0.795095	67.3985	0.275549	2.88549	0.00390802	0.0302941
XM_017319735.3	Gpr160	-1.35712	30.9854	0.47025	-2.88595	0.00390231	0.0302652
NM_001289581.1	Liph	-1.49886	86.9243	0.519119	-2.88732	0.00388533	0.0301488
XR_004942550.1	Pgm2	1.0492	112.458	0.363283	2.88811	0.00387559	0.0300885
NM_019869.3	Rbm14	0.664181	212.465	0.229922	2.88873	0.00386807	0.0300454
NM_011273.2	Xpr1	-0.40137	544.645	0.138896	-2.88972	0.00385591	0.0299662
XM_006501856.3	Gpr88	-0.545367	258.852	0.188579	-2.89198	0.00382818	0.0297658
NM_138597.2	Atp5o	0.362346	1139.55	0.125264	2.89266	0.00381999	0.0297173
XR_004942548.1	Colgalt2	-1.58284	46.1225	0.547171	-2.89277	0.00381863	0.0297173
NM_001361700.1	Galnt16	-2.18541	106.432	0.755356	-2.89322	0.00381311	0.0296941
XM_006539234.4	Spsb1	0.98394	291.59	0.339975	2.89416	0.00380179	0.0296479
NM_170669.2	Rps15a	0.450065	1720.53	0.155509	2.89414	0.00380194	0.0296479
XM_036165458.1	Smim14	-0.570847	336.037	0.197231	-2.8943	0.00380003	0.0296479
NM_001163472.1	Cyp2d22	-0.665984	120.576	0.230117	-2.89411	0.00380237	0.0296479
NM_001356527.1	Vamp4	-0.917451	231.179	0.316983	-2.89432	0.00379983	0.0296479
XM_036163923.1	Zfp691	-1.0659	125.201	0.368313	-2.894	0.00380363	0.0296479
XM_036161339.1	Zfp770	-1.26967	146.801	0.438743	-2.89387	0.00380524	0.0296479
XR_003956266.2	Abtb1	-0.712575	96.6288	0.246131	-2.89511	0.0037903	0.0296373
NM_001356481.1	Cpne3	-0.963127	433.504	0.332657	-2.89526	0.00378847	0.0296373
Rps26-ps1	Rps26-ps1	0.601158	1328.57	0.207604	2.8957	0.00378311	0.0296114
Gm10275	Gm10275	0.442666	891.1	0.152867	2.89576	0.00378247	0.0296114
NM_011244.4	Rarg	-1.22264	202.908	0.422183	-2.896	0.00377955	0.0296114
XR_380400.4	Pald1	-0.629216	602.011	0.217197	-2.89699	0.00376763	0.0295356
XM_006530532.5	Phkb	-1.78035	80.1508	0.614495	-2.89725	0.00376446	0.029526
XM_006512918.5	Slc18b1	-1.09271	52.2268	0.377128	-2.89745	0.00376206	0.0295223
NM_028597.3	Thoc3	1.01226	391.248	0.349326	2.89775	0.00375848	0.0295211
Gm9493	Gm9493	0.450353	705.039	0.155421	2.89763	0.00375998	0.0295211
XM_011238435.4	Lancl1	-0.676228	95.9606	0.233321	-2.89827	0.00375224	0.0294907
XM_030254869.1	Ep400	-0.703979	362.477	0.242876	-2.89851	0.00374935	0.0294832
NM_001081267.2	Rsf1	-0.819045	559.629	0.282511	-2.89916	0.00374161	0.0294375
XM_006526580.4	Gbf1	-1.36884	203.898	0.472122	-2.89933	0.00373957	0.0294366
NM_207301.3	Get1	-0.589517	204.568	0.203303	-2.8997	0.0037352	0.0294174
NM_016800.3	Vti1b	-3.59062	194.831	1.23807	-2.90018	0.0037295	0.0293876
NM_181278.2	B230219D22Rik	-0.657365	948.323	0.226604	-2.90094	0.0037204	0.029331
NM_026312.5	Pbdc1	0.471725	175.916	0.162542	2.90217	0.0037059	0.0292318
NM_009674.3	Anxa7	0.679745	321.64	0.234155	2.90297	0.00369645	0.0291723
XR_003956225.2	Tatdn2	0.462451	369.153	0.159271	2.90355	0.00368963	0.0291336
NM_026066.2	Cmtm5	-0.796957	175.831	0.274449	-2.90385	0.00368607	0.0291205
XM_036158289.1	Gm5454	-0.916414	71.6799	0.315322	-2.90628	0.00365749	0.0289097
Gm4899	Gm4899	1.28613	14.1884	0.442017	2.90968	0.00361802	0.0286125
NM_198606.2	Dcaf13	0.710329	304.231	0.244074	2.9103	0.00361085	0.0285802
XM_006501738.2	Pdlim5	0.576115	434.239	0.197964	2.9102	0.00361196	0.0285802
XM_006533752.5	Elp5	0.511966	303.52	0.175922	2.91019	0.00361206	0.0285802
NM_025902.3	Cisd2	0.41065	361.482	0.141096	2.91042	0.00360941	0.0285802
NM_019580.4	Gde1	0.878608	799.912	0.30184	2.91085	0.00360453	0.0285798
XM_030252397.2	Sox13	-0.704034	333.762	0.241866	-2.91085	0.00360449	0.0285798
Gm6192	Gm6192	1.29577	18.0296	0.445014	2.91175	0.00359411	0.0285268
NM_153127.3	Mmrn2	0.502664	884.574	0.17258	2.91265	0.00358381	0.0284599
NM_001163126.1	Cog5	-1.32516	23.0514	0.454847	-2.91342	0.00357492	0.0284041
Gm6450	Gm6450	0.441635	167.666	0.151571	2.91373	0.00357142	0.028391
NM_205823.2	Tlr12	-1.65314	77.2609	0.567092	-2.91511	0.00355564	0.0282803
NM_033575.4	Pcdhgb2	1.75134	8.54431	0.600541	2.91627	0.00354248	0.0281903
NM_178421.3	Nanos1	-0.700229	142.968	0.240101	-2.9164	0.00354098	0.0281903
XM_030254762.2	Ogfod2	-0.873879	38.3119	0.299562	-2.91719	0.00353199	0.0281362
NM_133854.3	Snapin	-0.389016	394.643	0.133322	-2.91786	0.00352446	0.0280908
NM_145497.2	Nmrk1	-1.98419	14.9263	0.67952	-2.91998	0.0035005	0.0279144
NM_001331193.1	A930033H14Rik	-1.35843	44.8446	0.465121	-2.92059	0.00349374	0.0278751
Tpm3-rs7	Tpm3-rs7	0.787313	2662.05	0.269411	2.92235	0.00347406	0.0277385
NM_146191.3	Lrrk1	-1.08392	124.422	0.370914	-2.92228	0.0034748	0.0277385
NM_080843.3	Socs4	-0.880532	233.62	0.301185	-2.92356	0.00346053	0.0276534
NM_025531.2	Prelid3b	0.33095	300.203	0.113144	2.92504	0.00344412	0.0275367
Gm5526	Gm5526	0.355491	5044.91	0.121512	2.92556	0.00343842	0.0275056
NM_001098171.1	Pcdh10	-0.780223	134.17	0.266634	-2.92619	0.00343137	0.0274636
NM_145609.2	Msantd4	-0.37759	430.875	0.129001	-2.92703	0.00342211	0.0274038
NM_001271708.1	Lrrn3	-0.877274	232.227	0.299622	-2.92794	0.00341217	0.0273386
NR_015491.1	A630089N07Rik	-2.68673	13.8798	0.917495	-2.92833	0.0034079	0.0273186
Ncoa4-ps	Ncoa4-ps	-0.666524	306.203	0.227496	-2.92982	0.00339156	0.027202
Gm4596	Gm4596	1.08583	36.3936	0.370276	2.9325	0.00336241	0.0269823
Gm15464	Gm15464	0.415806	506.647	0.141787	2.93261	0.00336129	0.0269823
XM_011249869.2	Gm39469	-1.97498	16.1566	0.673022	-2.9345	0.00334087	0.0268376
NM_001083955.1	Hba-a2	2.05667	1258.43	0.700494	2.93603	0.00332441	0.0267195
NM_001039115.2	Zkscan4	-2.27075	35.4735	0.773348	-2.93625	0.00332202	0.0267144
NM_008494.3	Lfng	-0.652671	207.783	0.222155	-2.9379	0.00330442	0.0265868
NM_018860.4	Rpl41	0.519973	3152.94	0.176973	2.93815	0.00330172	0.0265791
NM_025827.3	Lonp2	-4.79989	71.6821	1.63305	-2.93922	0.00329044	0.0265023
NM_001252638.1	Rhobtb1	0.913389	121.779	0.310342	2.94317	0.00324873	0.0261802
NM_008528.5	Blnk	-0.696428	428.53	0.23648	-2.94498	0.00322978	0.0260412
NR_002896.3	Snhg1	0.911844	68.4429	0.309407	2.94707	0.00320802	0.0258794
XM_006510396.5	Tbcel	-1.19052	29.9915	0.403873	-2.94775	0.00320091	0.0258357
NM_009236.2	Sox18	-2.06512	334.635	0.700486	-2.94813	0.00319703	0.025818
NM_001357628.1	Rpl10a	-5.58597	452.248	1.89469	-2.94822	0.00319611	0.025818
NM_001163452.1	Trpc4ap	-0.260129	851.819	0.0882043	-2.94917	0.00318634	0.0257589
XM_011246860.4	Pura	-0.527009	3984.45	0.178566	-2.95134	0.003164	0.0256004
NM_029951.1	Steep1	-0.62366	259.222	0.211322	-2.95124	0.00316505	0.0256004
XR_004935508.1	Dnaja4	-4.68428	105.379	1.58621	-2.95313	0.00314566	0.0254705
NM_007381.4	Acadl	0.772206	568.189	0.261468	2.95335	0.00314341	0.0254658
Gm14148	Gm14148	1.39345	41.9145	0.471582	2.95484	0.00312833	0.0253571
Gm10247	Gm10247	0.486296	386.755	0.164572	2.9549	0.00312766	0.0253571
NM_009577.3	Zik1	-0.776677	47.4357	0.262821	-2.95515	0.00312517	0.0253571
NM_027030.2	Dcps	-0.574162	158.399	0.194252	-2.95576	0.00311901	0.0253218
NM_133851.3	Nusap1	1.10633	24.7324	0.37419	2.95661	0.00311044	0.0252657
NM_028055.4	Btbd17	-2.08446	34.9103	0.705001	-2.95668	0.0031097	0.0252657
NM_009804.2	Cat	-0.711842	470.439	0.240725	-2.95707	0.00310577	0.0252546
XM_030245573.2	Gjc1	0.612566	125.373	0.207089	2.95798	0.00309658	0.0251933
NM_001008785.5	Kbtbd8	-2.5425	12.3584	0.859409	-2.95842	0.00309216	0.0251707
Gm13192	Gm13192	0.535015	409.365	0.180787	2.95937	0.00308271	0.0251177
XM_006510466.4	Prdm10	-4.09889	38.8993	1.38512	-2.95924	0.00308399	0.0251177
NM_008980.2	Ptpra	-0.733701	652.401	0.247845	-2.96032	0.00307321	0.0250566
NM_001368706.1	Cecr2	-1.35267	35.1084	0.456934	-2.96033	0.00307309	0.0250566
NM_001039483.1	Tmco1	-0.895054	687.322	0.302203	-2.96177	0.00305878	0.0249656
NM_019803.3	Ube2g2	0.422371	461.868	0.142468	2.96466	0.00303017	0.0247453
NM_001360658.1	Rplp2	0.429401	1832.18	0.144819	2.96508	0.00302607	0.024725
XM_006537558.4	Tgs1	-1.08067	227.07	0.364419	-2.96546	0.00302227	0.0247072
NM_023054.2	Utp3	0.398127	603.309	0.134241	2.96577	0.00301928	0.024696
NM_009193.2	Slbp	0.482961	101.323	0.162801	2.96657	0.00301142	0.0246449
XM_036154892.1	Zbtb16	0.789712	482.072	0.266133	2.96736	0.00300371	0.024595
NM_001301711.1	Mpdu1	0.826689	374.755	0.278526	2.96809	0.00299656	0.0245496
Gm6900	Gm6900	0.744317	105.78	0.250744	2.96843	0.00299325	0.0245357
NM_145523.3	Gca	-0.676818	68.9666	0.227905	-2.96974	0.00298054	0.0244446
XM_006529594.5	Cntnap5b	-1.43182	29.8055	0.482051	-2.97027	0.00297539	0.0244154
XM_006538026.4	Cntln	-1.01073	139.526	0.340174	-2.9712	0.00296636	0.0243544
Rpl10-ps1	Rpl10-ps1	0.461746	450.342	0.155313	2.973	0.00294901	0.0242251
NM_001291057.1	Lgals8	0.450765	320.865	0.151595	2.97347	0.00294449	0.0242009
NM_012052.2	Rps3	0.50113	4757.41	0.168516	2.97379	0.00294149	0.0241893
Gm12918	Gm12918	0.461265	1030.43	0.15506	2.97475	0.00293232	0.0241269
NM_021451.2	Pmaip1	1.12314	120.649	0.377238	2.97727	0.00290832	0.0239423
NM_023434.3	Tox4	0.497239	447.105	0.166954	2.9783	0.00289849	0.0238742
NM_145624.4	Zfp709	-1.75248	17.9616	0.588323	-2.97878	0.00289398	0.02385
Rpl12-ps1	Rpl12-ps1	0.518998	129.587	0.17413	2.98053	0.00287752	0.0237271
NM_001355384.1	Rps28	0.43095	2031.01	0.144588	2.98054	0.0028774	0.0237271
XM_030245916.2	Thra	-0.623406	500.385	0.209075	-2.98173	0.0028662	0.0236594
XM_036153369.1	Tyw5	1.35227	75.1236	0.453462	2.9821	0.00286282	0.0236442
XM_006521468.4	Arhgap8	2.77158	20.8139	0.929209	2.98273	0.00285693	0.0236083
XM_011245023.4	Phf11a	1.3774	35.9025	0.461498	2.98464	0.00283915	0.0234741
NM_028766.3	Tmem43	0.539141	458.924	0.180617	2.985	0.00283577	0.0234589
XM_036164296.1	Asph	-0.813356	384.56	0.272456	-2.98528	0.00283321	0.0234504
XM_036165089.1	Tmem119	-1.2085	5382.71	0.404756	-2.98575	0.00282886	0.023427
NM_001026212.1	Ensa	-0.908114	205.699	0.304102	-2.98621	0.00282455	0.023404
Rpl10-ps5	Rpl10-ps5	0.458426	430.395	0.153502	2.98645	0.0028224	0.0233989
NM_029872.1	Hnrnpa0	0.414198	2666.2	0.138611	2.98821	0.00280614	0.0232866
NM_021540.4	Rnf130	-1.0303	436.795	0.344804	-2.98808	0.00280732	0.0232866
XM_036155172.1	Gm11578	-0.95886	18.6198	0.320852	-2.98848	0.00280367	0.0232816
Gm3511	Gm3511	0.556904	715.71	0.186268	2.9898	0.00279163	0.0231942
XM_006534504.1	Helz	-2.77805	248.244	0.928934	-2.99058	0.00278451	0.0231476
NM_009063.4	Rgs5	-1.4907	329.694	0.498325	-2.99141	0.00277689	0.0230969
NM_008628.3	Msh2	-1.05216	151.166	0.3517	-2.99163	0.00277489	0.0230928
XM_006504280.5	Ran	1.28662	55.0548	0.429995	2.99218	0.00276993	0.0230641
Gm6722	Gm6722	0.635526	144.878	0.212291	2.99365	0.00275662	0.0229658
NR_169100.1	Rpl17-ps10	0.468785	131.561	0.156592	2.99367	0.00275645	0.0229658
Gm6136	Gm6136	0.470227	2308.08	0.157045	2.99422	0.00275151	0.0229483
NM_008569.2	Anapc1	-1.21165	40.1705	0.404526	-2.99524	0.00274226	0.0228836
NM_178214.4	H2bc21	-0.938695	56.7397	0.313251	-2.99662	0.00272992	0.0227931
NM_010398.3	H2-T23	1.70454	115.938	0.568097	3.00043	0.00269598	0.022522
XM_006529398.3	Epb41l5	-1.19917	27.8943	0.399497	-3.0017	0.00268479	0.0224409
NM_011574.2	Utp4	0.674417	177.309	0.224616	3.00253	0.00267747	0.0223919
Gm8942	Gm8942	0.791291	258.831	0.263483	3.00319	0.00267164	0.0223554
NM_008218.2	Hba-a1	2.07531	1363	0.690977	3.00345	0.0026694	0.0223489
NM_001317391.1	Large1	-0.463162	430.288	0.154203	-3.00359	0.00266816	0.0223489
Gm9347	Gm9347	0.613968	88.6791	0.204394	3.00384	0.00266596	0.0223446
XM_036155773.1	L3mbtl3	-0.670791	149.159	0.223288	-3.00416	0.00266319	0.0223337
Gm3550	Gm3550	0.847023	44.7144	0.281935	3.00432	0.00266173	0.0223337
NM_025813.3	Mfsd1	0.783025	1398.13	0.260606	3.00464	0.00265898	0.0223228
NM_009649.3	Pakap	1.80048	586.811	0.599178	3.00492	0.00265654	0.0223146
NM_027185.3	Def6	0.750583	186.262	0.249774	3.00505	0.00265536	0.0223146
Gm14227	Gm14227	0.775197	52.0201	0.257884	3.006	0.00264713	0.0222601
Gm15801	Gm15801	0.796579	297.042	0.264941	3.00663	0.00264163	0.0222261
NM_178098.2	4930486L24Rik	1.29812	98.3048	0.431592	3.00775	0.00263189	0.0221564
NM_010860.4	Myl6	2.98848	193.757	0.993496	3.00805	0.00262933	0.022147
XM_006496737.4	Fam20b	-0.417784	341.146	0.13887	-3.00846	0.00262576	0.0221291
NM_144837.3	Ice1	-0.795103	244.608	0.264272	-3.00866	0.00262404	0.0221269
NM_172685.3	Slc25a24	0.701988	265.732	0.233277	3.00925	0.00261894	0.022096
NM_029803.3	Ifi27l2a	2.12269	395.754	0.705252	3.00984	0.00261388	0.0220656
NR_027984.1	2810025M15Rik	-0.536831	368.712	0.178262	-3.01148	0.00259978	0.0219587
Gm21399	Gm21399	0.504604	301.124	0.167466	3.01318	0.00258528	0.0218482
TrnQ	TrnQ	-1.45113	122.057	0.481571	-3.01333	0.002584	0.0218482
NM_009759.4	Bmx	-2.56892	93.6797	0.852196	-3.01447	0.00257428	0.0217794
Gm13736	Gm13736	0.580917	212.112	0.192698	3.01465	0.00257273	0.0217783
NM_016859.3	Bysl	1.1511	190.594	0.381742	3.01539	0.00256647	0.0217374
NM_001039089.1	Sel1l	-0.480904	316.004	0.159464	-3.01575	0.00256344	0.0217238
NM_011734.4	Siae	-1.03298	138.527	0.342493	-3.01606	0.00256081	0.0217136
NM_016891.3	Ppp2r1a	0.502872	1663.14	0.16671	3.01645	0.00255753	0.0216978
NM_001362868.1	Rhot1	-2.81963	113.142	0.934624	-3.01686	0.00255406	0.0216804
XM_006497943.5	BC005624	-0.603307	196.154	0.199855	-3.01872	0.00253843	0.0215597
NM_008973.3	Ptn	-3.04488	709.9	1.00859	-3.01894	0.0025366	0.0215562
XM_011241111.2	Nt5c3	0.36196	298.384	0.119832	3.02055	0.00252313	0.0214536
XR_003955700.2	Pign	-0.623118	75.928	0.206259	-3.02105	0.00251899	0.0214304
NM_011800.5	Cdh20	-1.84203	21.8107	0.609522	-3.0221	0.00251031	0.0213684
NM_009227.3	Snrpe	0.501868	501.054	0.165982	3.02363	0.00249761	0.0212722
NM_001195130.1	Phc2	0.68508	31.206	0.226532	3.0242	0.00249289	0.0212438
Gm32256	Gm32256	0.599096	196.988	0.198084	3.02446	0.00249078	0.0212377
NM_172964.4	Arhgap28	2.24643	16.7316	0.742308	3.02628	0.00247585	0.0211249
NM_001361584.1	Krt222	-0.991442	78.7213	0.327615	-3.02624	0.00247617	0.0211249
NM_011865.4	Pcbp1	0.434656	1363.11	0.143499	3.02899	0.00245377	0.0209591
XM_036161016.1	Pkp4	-0.784804	774.98	0.259087	-3.02912	0.0024527	0.0209591
XR_004942436.1	Stx2	-0.835493	191.166	0.275835	-3.02896	0.00245399	0.0209591
NM_011578.4	Tgfbr3	-0.83989	154.711	0.277248	-3.02938	0.00245059	0.0209591
XM_006533244.5	Rsad1	-1.19371	53.0088	0.393987	-3.02982	0.00244697	0.020946
NM_001282037.1	Sh3glb1	-0.858986	1231.44	0.283445	-3.03053	0.00244128	0.020909
XR_004940707.1	Stard9	-1.39049	43.9607	0.458689	-3.03144	0.00243392	0.0208577
XM_017320114.2	Tnfsf8	3.94549	45.7793	1.30115	3.0323	0.00242695	0.0208096
NM_010496.3	Id2	1.32799	2783.12	0.437574	3.0349	0.00240615	0.0206428
NM_008900.3	Pou3f3	-0.742628	216.709	0.244627	-3.03575	0.00239934	0.0205961
NM_001357135.1	Mettl4	-1.17503	87.5147	0.386994	-3.0363	0.00239498	0.0205701
NM_025589.4	Rpl36al	0.507078	790.113	0.166972	3.0369	0.00239028	0.0205512
Gm8971	Gm8971	0.496043	86.3288	0.163346	3.03675	0.00239143	0.0205512
XM_006516491.5	Zmynd11	-0.552254	1534.5	0.181797	-3.03774	0.00238357	0.0205068
NM_027891.4	Lrwd1	-0.80676	92.3765	0.265537	-3.03822	0.0023798	0.0204858
NM_022019.6	Dusp10	1.1557	33.9345	0.380321	3.03874	0.0023757	0.0204621
Gm10154	Gm10154	0.401293	1323.84	0.132009	3.03989	0.00236662	0.0203954
NM_001168507.1	Tmem11	0.59181	273.125	0.194598	3.0412	0.00235638	0.0203186
XM_006520056.5	Nipal2	-1.20745	30.0963	0.39698	-3.04159	0.00235328	0.0203034
XM_030248364.1	Parvb	-3.13148	483.792	1.02954	-3.04163	0.00235297	0.0203034
XM_006511198.4	Psma4	0.631159	684.992	0.207434	3.0427	0.00234467	0.0202583
NM_001291046.1	Nudt3	-0.369074	1545.21	0.121292	-3.04286	0.00234343	0.0202583
XR_004942002.1	Mfsd2a	-1.35528	653.222	0.445435	-3.0426	0.00234541	0.0202583
XM_006498085.5	Acvr1c	-1.26975	62.8627	0.416941	-3.0454	0.00232371	0.020105
XM_036165682.1	Rps15a-ps5	0.584477	709.615	0.191846	3.04659	0.00231451	0.0200368
XM_036158581.1	Phf11b	2.16687	219.715	0.710783	3.04857	0.00229936	0.0199337
Gm4674	Gm4674	0.720323	103.797	0.236302	3.04831	0.0023013	0.0199337
NM_023142.2	Arpc1b	0.427991	2301.55	0.140396	3.04846	0.00230014	0.0199337
Rpl36-ps3	Rpl36-ps3	0.534542	486.634	0.175315	3.04904	0.00229572	0.0199243
NM_181416.3	Arhgap11a	-0.852582	54.7663	0.27963	-3.04897	0.0022963	0.0199243
Gm8253	Gm8253	0.470435	131.031	0.154233	3.05017	0.00228713	0.0198673
XR_377473.5	Dnah6	3.19797	30.5594	1.04817	3.051	0.00228083	0.0198238
Rpl36a-ps1	Rpl36a-ps1	0.366721	1063.36	0.120092	3.05368	0.00226057	0.0196589
XM_036154188.1	Adgrg3	2.596	15.1176	0.849696	3.05521	0.002249	0.0195695
Gm10269	Gm10269	0.593699	561.733	0.19432	3.05527	0.00224861	0.0195695
XM_006501917.4	Trim59	-0.953305	50.8386	0.312017	-3.0553	0.00224835	0.0195695
Gm6065	Gm6065	0.550222	57.9469	0.180017	3.0565	0.0022394	0.0195194
NM_011544.3	Tcf12	-0.672972	651.761	0.220126	-3.05721	0.0022341	0.0194842
NM_033474.3	Arvcf	-0.929082	61.0414	0.303822	-3.05798	0.00222835	0.0194452
XM_017321932.3	Adam8	2.97397	85.8434	0.972241	3.05888	0.0022217	0.0193982
NM_029875.2	Slc35e3	-0.717962	67.0307	0.23469	-3.05919	0.00221938	0.0193891
NM_133964.3	Dohh	0.320243	382.963	0.104656	3.05996	0.00221364	0.01935
XR_387190.3	Ppfia4	-0.916583	424.936	0.299477	-3.06061	0.00220885	0.0193227
NM_053099.3	Setbp1	-1.03872	121.125	0.33939	-3.06056	0.00220925	0.0193227
XM_006529920.2	Clasp1	-1.65188	104.476	0.539551	-3.06158	0.00220175	0.0192792
XR_004942770.1	Gm52824	-2.92379	36.3849	0.954761	-3.06233	0.00219621	0.0192417
NM_001242389.1	Trip10	-3.28105	50.2395	1.07135	-3.06254	0.00219467	0.0192393
NM_016690.4	Hnrnpdl	3.41718	220.217	1.11552	3.06332	0.00218897	0.0192003
NR_028299.1	1700084E18Rik	1.09002	14.1263	0.355813	3.06347	0.00218788	0.0192003
XM_006540392.5	Eif3k	0.304155	860.253	0.09928	3.06361	0.00218687	0.0192003
XM_006525081.4	Rftn1	1.0255	165.061	0.334649	3.0644	0.00218108	0.0191642
XM_036164290.1	Ube4b	-0.457285	363.76	0.149191	-3.0651	0.00217598	0.0191303
Gm6975	Gm6975	0.684256	38.2046	0.223191	3.06579	0.00217097	0.0190973
XM_036160251.1	Ttbk1	-1.60452	151.718	0.523355	-3.06582	0.00217071	0.0190973
XM_006504268.5	Usp46	-0.485363	220.784	0.158282	-3.06644	0.00216621	0.0190774
NM_008495.2	Lgals1	1.12653	103.722	0.36734	3.06673	0.00216416	0.0190703
XM_036153657.1	Gm15483	0.583058	137.004	0.189891	3.07049	0.0021371	0.0188427
XM_011245972.4	St3gal6	-1.66731	450.233	0.542838	-3.07147	0.00213008	0.0187917
XM_036154338.1	Neto2	-0.648934	108.657	0.211133	-3.07358	0.0021151	0.0186703
Gm10086	Gm10086	0.478547	995.142	0.155657	3.07437	0.00210947	0.0186314
XM_036158815.1	Kif16b	-1.08734	65.7976	0.353197	-3.07857	0.00207995	0.0183813
NM_016852.3	Wbp2	0.559704	1419.77	0.181704	3.08031	0.00206788	0.0182852
NM_153053.4	Sf3b4	0.611881	342.344	0.198601	3.08096	0.00206337	0.0182559
NM_027355.2	Rnf168	-0.501477	319.386	0.162764	-3.081	0.00206308	0.0182559
NM_011187.1	Psmb7	0.935974	603.914	0.303673	3.08218	0.0020549	0.018202
XM_030242680.2	Ifitm10	0.540324	118.507	0.175303	3.08223	0.00205454	0.018202
NM_008410.3	Itm2b	-0.341399	12564.6	0.110734	-3.08307	0.00204879	0.018169
Gm12988	Gm12988	-1.49489	23.9154	0.484738	-3.08391	0.00204301	0.0181283
XM_036166134.1	Mndal	-1.15991	41.4316	0.375963	-3.08518	0.00203428	0.0180614
Gm12844	Gm12844	0.763391	186.78	0.247406	3.08558	0.00203155	0.0180476
NM_145590.2	Rusf1	-0.865554	56.3268	0.280415	-3.08669	0.00202399	0.0179909
XM_006508100.3	Kctd21	-2.05677	50.9988	0.666172	-3.08745	0.00201884	0.0179555
NM_007607.2	Car4	-4.11047	543.729	1.33048	-3.08947	0.00200514	0.0178441
Gm17592	Gm17592	0.506929	145.264	0.164058	3.08993	0.00200206	0.0178271
NM_001285991.1	Tbc1d5	-1.22271	140.131	0.395682	-3.09013	0.0020007	0.0178254
NM_001372392.1	Tada3	-0.54435	168.29	0.17611	-3.09097	0.00199506	0.0177855
XM_006523676.5	H2-K1	2.11273	2794.57	0.68338	3.0916	0.00199084	0.017765
Gm11488	Gm11488	1.39734	223.921	0.451992	3.09152	0.00199135	0.017765
NM_001168244.1	Syce2	0.8967	40.1423	0.290055	3.09148	0.00199159	0.017765
Gm7266	Gm7266	0.774683	25.6204	0.250527	3.09222	0.00198669	0.017765
NM_009078.2	Rpl19	0.557454	1225.81	0.18028	3.09216	0.00198705	0.017765
NM_026932.4	Ebna1bp2	0.488718	287.028	0.158078	3.09162	0.0019907	0.017765
NM_022327.5	Ralb	0.412033	620.463	0.133265	3.09182	0.00198931	0.017765
Rps2-ps8	Rps2-ps8	0.866129	24.7075	0.28004	3.09288	0.00198225	0.0177619
NM_001356476.1	Mrto4	0.715555	118.881	0.231365	3.09275	0.00198311	0.0177619
Gm2296	Gm2296	0.86169	157.193	0.278547	3.09351	0.00197801	0.0177371
NR_029471.2	Rps15a-ps6	0.57402	1001.78	0.185347	3.097	0.00195489	0.01754
NM_172713.2	Sdad1	0.926855	144.018	0.299126	3.09855	0.00194473	0.0174592
NM_020050.1	Tmem9b	0.21744	961.305	0.0701519	3.09956	0.00193807	0.0174095
NM_001042655.1	Tbc1d17	-0.664938	141.417	0.21452	-3.09966	0.00193742	0.0174095
NM_001081211.2	Ptafr	-0.641777	395.92	0.206883	-3.10213	0.00192135	0.0172797
XM_011238417.3	Mrpl30	0.381288	278.827	0.122903	3.10235	0.0019199	0.0172769
NM_009838.3	Cct6a	0.509752	985.003	0.164299	3.1026	0.00191831	0.0172732
XM_036161552.1	Rorb	-1.00949	134.019	0.325369	-3.10259	0.00191836	0.0172732
NM_011391.2	Slc16a7	-1.3783	69.7801	0.444105	-3.10354	0.00191218	0.0172378
NM_009945.3	Cox7a2	0.281086	1972.13	0.0905578	3.10394	0.00190963	0.017225
XR_001784633.3	Pkd2	-0.855536	171.35	0.275579	-3.10451	0.00190597	0.0172022
XM_006503433.3	Kif2c	4.4518	18.212	1.43381	3.10487	0.00190362	0.0171924
NM_020520.5	Slc25a20	0.46582	189.839	0.15003	3.10485	0.00190376	0.0171924
XM_006518383.4	Rcbtb2	-1.24116	130.858	0.399707	-3.10518	0.00190163	0.0171924
XR_388372.5	Wdr81	-0.540294	211.28	0.173942	-3.10617	0.0018953	0.0171464
NM_022417.3	Itm2c	0.424124	6770.62	0.13651	3.10692	0.0018905	0.0171131
NM_010124.2	Eif4ebp2	-1.45033	129.557	0.466734	-3.10739	0.00188746	0.0170958
NM_001358974.1	Rbmxl1	0.405613	162.208	0.130459	3.10911	0.0018765	0.0170066
NM_011594.3	Timp2	-0.695192	4276.74	0.223535	-3.10999	0.00187093	0.0169661
Gm7962	Gm7962	0.74605	43.5803	0.239854	3.11043	0.00186814	0.0169509
NR_029432.1	1500015A07Rik	1.8561	36.4083	0.596669	3.11076	0.00186604	0.0169419
NM_027136.3	Ovca2	-1.39285	141.442	0.447703	-3.1111	0.00186391	0.0169326
NM_009531.2	Xpc	-1.14573	102.285	0.368076	-3.11274	0.00185357	0.0168487
NM_008796.3	Pctp	-1.88672	33.3933	0.606011	-3.11335	0.00184977	0.0168242
NM_025404.3	Arl4d	1.03491	122.657	0.332375	3.11367	0.00184775	0.0168158
Gm6807	Gm6807	0.524284	972.396	0.168366	3.11395	0.00184599	0.0168098
NM_026014.3	Cdt1	1.1955	72.5292	0.383857	3.11444	0.00184296	0.0167922
NM_001357008.1	P2ry12	-2.58122	2506.03	0.828537	-3.11539	0.00183701	0.016748
XR_001783213.3	Cep152	0.892572	93.8598	0.286469	3.11577	0.00183466	0.0167366
NM_023172.4	Ndufb9	0.275468	1202.59	0.0883815	3.1168	0.00182826	0.0166882
XM_006500198.4	Apmap	0.73727	306.301	0.236533	3.11699	0.00182708	0.0166874
NM_177124.4	Tnrc6b	-1.18956	198.065	0.381515	-3.118	0.00182085	0.0166404
XM_036161593.1	9930021J03Rik	-0.782278	220.496	0.250491	-3.12298	0.00179031	0.0163712
NM_001243008.1	Col6a3	-4.04289	33.6441	1.29439	-3.1234	0.00178776	0.0163576
NM_008029.3	Flt4	0.942509	244.39	0.301637	3.12465	0.00178015	0.0162978
NR_040721.1	Snhg5	2.44311	107.496	0.781531	3.12605	0.00177169	0.01623
XM_006539171.5	Prdm16	-1.35521	76.5979	0.433464	-3.12647	0.00176921	0.016217
XM_006502212.4	Tent5c	1.25567	370.314	0.40144	3.1279	0.00176058	0.0161477
XM_006520952.4	Ttc38	-1.04753	91.3725	0.334846	-3.1284	0.00175759	0.0161299
XM_006511929.5	Cdc25a	0.907935	109.35	0.290122	3.12949	0.00175108	0.0160798
XM_036158266.1	Gm10029	0.576718	71.3635	0.184273	3.12969	0.00174989	0.0160786
NR_104438.1	Clmn	-2.49499	514.4	0.797124	-3.12999	0.00174812	0.0160719
NM_008202.2	Slc39a7	0.595288	436.172	0.190123	3.13108	0.00174167	0.0160224
NM_178886.3	Ldlrad3	-1.41087	297.068	0.450579	-3.13124	0.00174069	0.0160224
NM_011300.3	Rps7	0.482581	431.578	0.154012	3.1334	0.00172796	0.0159154
NM_027478.3	Tmem230	-0.871068	125.755	0.277959	-3.1338	0.00172558	0.015903
XM_030253416.2	Fam214b	0.786407	195.48	0.250918	3.13412	0.00172368	0.0158952
NM_027231.2	Polr2f	0.511222	456.938	0.163033	3.13569	0.00171452	0.0158202
NM_010947.3	Ntn3	-1.49606	32.7743	0.476739	-3.13812	0.00170034	0.0156989
XM_036158999.1	Bmf	1.11195	203.626	0.354262	3.13877	0.0016966	0.0156978
NM_009510.2	Ezr	0.888844	437.549	0.283223	3.13832	0.0016992	0.0156978
NM_011443.4	Sox2	-0.825647	171.301	0.263086	-3.13832	0.00169919	0.0156978
XM_036164836.1	Zbtb37	-1.30088	47.8858	0.414492	-3.1385	0.00169815	0.0156978
NM_024181.2	Dnajc10	-1.61869	264.841	0.515293	-3.14131	0.00168197	0.0155763
Gm12184	Gm12184	-0.722396	536.173	0.229828	-3.14321	0.00167109	0.0154849
NM_021788.2	Sap30	0.775987	45.1973	0.246745	3.14489	0.00166147	0.0154052
Gm11539	Gm11539	0.576793	424.517	0.183359	3.14571	0.00165686	0.0153717
XR_003951492.1	Gm2824	-2.1944	15.7803	0.696903	-3.14878	0.00163952	0.0152201
XM_036153497.1	Tubgcp2	0.473292	137.518	0.150241	3.15023	0.00163144	0.0151543
NM_001355188.1	Mtfr1l	-0.594425	323.711	0.188527	-3.153	0.00161602	0.0150202
XM_030254217.2	Ptpn12	1.06353	324.132	0.337214	3.15386	0.00161126	0.0149851
NM_025340.2	Sharpin	0.456901	216.803	0.14486	3.15409	0.00160999	0.0149824
NM_001357022.1	Rrm2b	-1.0754	99.2573	0.340827	-3.15525	0.00160361	0.0149321
NM_026321.4	Fam174a	-0.548094	317.669	0.17357	-3.15777	0.00158984	0.0148129
NM_145620.4	Rrp9	0.833825	94.337	0.2639	3.15962	0.00157975	0.0147279
NM_178648.2	Ubxn8	0.806815	175.947	0.255333	3.15985	0.00157851	0.0147254
XM_006524255.5	Zfp563	-1.12259	57.9935	0.355153	-3.16087	0.00157299	0.0146829
NM_139064.2	Tnip2	0.853092	105.641	0.269841	3.16146	0.00156982	0.0146622
XM_006518877.5	Fam167a	2.51325	26.0727	0.79439	3.16374	0.00155753	0.0145564
NM_177664.5	Plppr4	-0.61766	394.508	0.195199	-3.16426	0.0015548	0.014548
NM_029074.3	Cnep1r1	-0.685909	255.216	0.216779	-3.16409	0.00155569	0.014548
XM_006498373.1	Mvb12b	-0.378064	581.46	0.119463	-3.16469	0.00155248	0.0145358
NM_026281.2	Tm7sf3	-0.72731	201.063	0.229768	-3.1654	0.00154867	0.0145091
XM_006526766.5	Plcb3	-1.39707	116.262	0.441295	-3.16584	0.00154634	0.0144961
NM_173740.3	Maoa	-0.763543	574.24	0.241113	-3.16674	0.0015416	0.0144605
XM_006540642.5	Igf1r	-1.52881	1688.56	0.482734	-3.16697	0.00154035	0.0144577
NM_145564.4	Fbxo21	2.85722	82.467	0.90181	3.16832	0.00153324	0.0143998
XM_030245588.1	Hdac5	-0.696212	459.252	0.219738	-3.16837	0.00153294	0.0143998
XM_036160185.1	Glis2	-1.20888	47.478	0.381283	-3.17057	0.00152143	0.0143065
Gm6181	Gm6181	-0.495611	376.642	0.156289	-3.17112	0.00151851	0.0142879
Rps24-ps3	Rps24-ps3	0.730473	1128.44	0.230319	3.17157	0.00151615	0.0142744
Gm11878	Gm11878	0.691256	170.366	0.217892	3.17247	0.00151147	0.0142391
NM_001113358.1	Dad1	0.814658	1155.28	0.256683	3.17379	0.00150465	0.0141836
Rpsa-ps9	Rpsa-ps9	0.612366	430.61	0.192841	3.17549	0.00149582	0.0141092
NM_010786.4	Mdm2	0.671289	341.736	0.211379	3.17576	0.00149447	0.0141051
XR_004936303.1	Cep83	-1.25601	113.181	0.395437	-3.17625	0.00149194	0.01409
XR_004938408.1	Cadps	-2.10226	131.91	0.661769	-3.17672	0.0014895	0.0140756
NM_011957.2	Creb3l1	0.841907	39.8156	0.264874	3.17852	0.00148031	0.0139974
NM_133722.2	Abhd17c	-0.509804	403.683	0.160335	-3.17961	0.00147472	0.0139549
NR_168913.1	Txnl4a	-1.05484	117.115	0.331754	-3.17958	0.0014749	0.0139549
NM_138667.3	Tab2	-0.492777	1331.9	0.154933	-3.18058	0.00146982	0.0139241
NM_001305437.1	Pter	2.50823	47.7652	0.787909	3.1834	0.00145557	0.0137976
Gm5529	Gm5529	0.727431	149.349	0.228467	3.18396	0.00145275	0.0137794
XM_030246778.2	Heatr5a	-0.9623	241.099	0.302032	-3.18609	0.0014421	0.013687
XM_011239742.4	Zfp442	-1.56353	61.9454	0.490355	-3.18857	0.00142979	0.0135785
NM_001081355.3	Prdm2	-0.635342	180.04	0.19915	-3.19028	0.00142137	0.013507
NM_001033374.3	Srarp	-1.90751	252.172	0.59784	-3.19067	0.00141942	0.0134968
XM_006504569.3	Agfg2	0.545283	93.5518	0.170739	3.19366	0.00140481	0.0133663
NM_172705.2	Phf13	0.632919	155.392	0.198072	3.1954	0.00139637	0.0132943
NM_024288.2	Rmnd5a	-0.600419	537.608	0.187895	-3.19551	0.00139586	0.0132943
NM_010145.3	Ephx1	-0.643152	196.289	0.201192	-3.19671	0.00139004	0.0132505
NM_025898.4	Napa	2.16584	304.65	0.677323	3.19764	0.00138558	0.0132162
XM_006530630.2	Cdh5	2.49241	65.0194	0.779253	3.19846	0.00138165	0.013187
XM_006520986.3	Dazap2	-4.03371	661.332	1.26032	-3.20056	0.00137161	0.0130993
NM_001305003.1	Rab5c	0.505377	1774.78	0.157852	3.2016	0.00136669	0.0130605
NM_001276355.1	Grin3a	-0.75615	87.265	0.236017	-3.20379	0.00135629	0.0129693
NM_021366.3	Klf13	0.678594	3778.07	0.211793	3.20404	0.00135515	0.0129665
NM_021281.3	Ctss	0.694729	17267.4	0.216786	3.20467	0.00135218	0.0129462
NM_175438.4	Aldh4a1	-0.988395	118.342	0.308418	-3.20472	0.00135192	0.0129462
Gm3375	Gm3375	0.545786	727.41	0.170211	3.20652	0.00134353	0.0128795
NM_145822.2	Cd3eap	0.690844	452.104	0.215434	3.20675	0.00134244	0.0128771
XM_006535076.5	Hnrnpdl	4.24624	376.057	1.32406	3.207	0.00134127	0.012874
NM_011186.1	Psmb5	0.557504	542.341	0.173767	3.20834	0.00133501	0.012822
Gm46808	Gm46808	0.766238	38.5637	0.238673	3.21041	0.00132546	0.0127383
NM_053267.3	Selenom	-0.275181	473.889	0.0857069	-3.21072	0.00132402	0.0127324
XM_030249795.2	Zfp952	-1.17649	72.7896	0.366311	-3.21171	0.00131947	0.0126967
NM_201609.2	Zfp652	-0.580084	113.15	0.180545	-3.21297	0.00131371	0.0126492
NM_198967.5	Tmtc1	-0.692094	174.609	0.215205	-3.21597	0.00130005	0.0125256
XM_011246551.4	Plin4	2.76379	43.4667	0.859152	3.21688	0.00129593	0.0124938
NM_019742.4	Tusc2	-0.269612	379.319	0.0837267	-3.22015	0.00128125	0.0123601
NM_001122596.1	P2ry10b	-2.27887	29.7128	0.707529	-3.22089	0.00127794	0.0123359
NR_045268.1	2810013P06Rik	-0.846029	129.235	0.262654	-3.22108	0.00127709	0.0123355
XM_011250219.4	Slc66a1	-1.19836	78.467	0.372035	-3.22111	0.00127697	0.0123355
XM_011241245.4	Mthfd2	1.22099	148.449	0.378932	3.22218	0.0012722	0.0123183
NM_001033326.3	Dhrsx	0.945699	66.1639	0.293527	3.22184	0.00127369	0.0123183
Gm19587	Gm19587	0.408749	1152.19	0.126864	3.22195	0.00127321	0.0123183
NM_001364358.1	Map1lc3b	0.552586	130.975	0.171465	3.22274	0.00126972	0.0123032
NM_144894.3	Zgpat	-1.16471	59.1658	0.361361	-3.22311	0.00126808	0.0122951
NM_001111099.2	Cdkn1a	2.57736	2336.84	0.799512	3.22367	0.00126558	0.0122807
NM_025776.2	Rbm22	0.904359	470.008	0.280541	3.22363	0.00126579	0.0122807
NM_026346.3	Fbxo32	-0.977363	140.18	0.303122	-3.22433	0.0012627	0.0122663
XM_036159478.1	Nckap5l	-0.65541	87.0485	0.203241	-3.2248	0.00126062	0.0122539
NR_002700.1	Gm7334	0.998514	183.804	0.309462	3.22661	0.00125265	0.0121842
NM_009169.2	Sem1	0.454828	1313.56	0.140847	3.22923	0.00124125	0.012081
XR_004939300.1	Bend7	-1.05736	51.1019	0.32739	-3.22965	0.00123941	0.0120708
XM_036152630.1	Ctbp2	-0.881088	162.398	0.272792	-3.22989	0.00123839	0.0120685
XM_006527169.3	Flrt1	-2.01093	160.311	0.622556	-3.23012	0.00123738	0.0120664
NM_001253804.1	Slc12a4	0.702789	112.559	0.217426	3.23231	0.00122795	0.0119896
NM_001194940.2	Dlc1	-0.546535	599.581	0.169094	-3.23213	0.00122872	0.0119896
NR_003568.1	Gpr137b-ps	-0.666011	128.915	0.206039	-3.23245	0.00122735	0.0119896
NM_194339.1	Bms1	-0.690555	351.487	0.213618	-3.23266	0.00122642	0.0119896
NM_019430.2	Cacng3	-0.580926	166.823	0.179594	-3.23466	0.00121788	0.0119143
NM_178911.4	Pld4	-0.496498	846.345	0.153389	-3.23685	0.00120857	0.0118308
NM_001033273.3	5031439G07Rik	-0.640235	326.562	0.197764	-3.23737	0.00120635	0.0118178
NM_019923.4	Itpr2	-1.02221	272.553	0.315756	-3.23735	0.00120646	0.0118178
NM_001360857.1	Timm17a	0.522158	336.42	0.161253	3.23812	0.00120318	0.0118008
XR_001782733.3	Drp2	-1.51068	38.5015	0.466452	-3.23868	0.00120086	0.0117856
Rps11-ps1	Rps11-ps1	0.545302	799.985	0.168336	3.23936	0.00119796	0.0117647
NM_027107.1	Ten1	0.532554	109.379	0.164359	3.24019	0.0011945	0.0117382
NM_001100449.2	Taf4b	0.997682	47.2814	0.30787	3.24059	0.00119281	0.0117292
NM_019641.4	Stmn1	-0.493554	380.174	0.152198	-3.24284	0.00118345	0.0116447
NM_175471.4	Cyb5rl	-1.23781	25.0583	0.381482	-3.24473	0.00117563	0.0115751
NM_133242.3	Rbm39	2.82233	206.735	0.869418	3.24623	0.00116946	0.0115218
Cd9-ps	Cd9-ps	0.916016	290.891	0.282101	3.24712	0.00116578	0.011493
XM_030247245.2	Zfp85	-1.99359	20.8365	0.613876	-3.24755	0.00116403	0.0114832
NM_009987.4	Cx3cr1	-1.80177	18544.1	0.554705	-3.24816	0.00116155	0.011466
NM_001201391.1	Hbb-bs	2.24194	1114.4	0.690084	3.2488	0.00115895	0.0114478
XM_017316214.3	Appl1	-0.450749	430.441	0.138709	-3.2496	0.00115568	0.0114229
NM_009930.2	Col3a1	-3.91675	21.9897	1.20425	-3.25244	0.0011442	0.0113168
NM_001081201.2	Dpy19l4	-1.15032	224.976	0.353569	-3.25347	0.00114005	0.0112831
Rpl3-ps2	Rpl3-ps2	0.409616	934.559	0.125877	3.2541	0.00113753	0.0112654
NM_134189.2	Galnt10	-1.33687	134.421	0.410786	-3.25442	0.00113623	0.0112598
NM_028013.3	Endod1	0.76122	342.415	0.233853	3.25513	0.00113341	0.0112392
XM_036152466.1	Gm10420	0.925564	35.5028	0.284322	3.25533	0.0011326	0.0112384
NM_177325.3	Tsr1	1.43974	53.5212	0.442232	3.25563	0.00113141	0.0112339
XR_379116.2	Sik2	-1.03404	181.122	0.317607	-3.25571	0.00113108	0.0112339
NM_172151.4	Zdhhc8	-0.61064	282.883	0.187495	-3.25684	0.00112659	0.0112006
NM_025610.3	Asrgl1	-0.899008	140.694	0.275916	-3.25827	0.00112093	0.0111517
NM_019877.2	Copz2	-0.808327	94.575	0.247795	-3.26208	0.00110597	0.0110099
XM_017315807.3	Bnip3l	-0.506454	811.554	0.155229	-3.26262	0.00110387	0.0110018
XM_036162721.1	Adamtsl2	-2.0747	23.1877	0.635927	-3.26248	0.00110443	0.0110018
XM_011243704.3	Ikzf1	2.7211	138.788	0.833847	3.26331	0.0011012	0.0109839
NM_008773.4	P2ry2	2.54748	16.7195	0.780244	3.26498	0.00109474	0.0109299
NM_175562.3	Rab39	-1.40808	46.4746	0.431278	-3.26489	0.00109507	0.0109299
NM_172518.3	Fbxo42	-0.663488	116.155	0.203173	-3.26563	0.00109222	0.0109158
NM_028808.3	P2ry13	-1.99755	1934.36	0.611516	-3.26655	0.00108867	0.0108874
XM_017315527.2	Mast4	0.603277	456.22	0.184658	3.267	0.00108695	0.0108773
NM_001358917.1	Ift81	-1.33989	60.7739	0.410087	-3.26734	0.00108564	0.0108713
NR_028355.1	Sra1	0.545318	231.369	0.166877	3.26779	0.0010839	0.010863
Gm8680	Gm8680	0.533802	623.417	0.163355	3.26774	0.00108409	0.010863
NM_018763.2	Chst2	0.877676	413.705	0.26851	3.26869	0.00108048	0.010841
XM_036161791.1	Slc7a3	2.71965	83.8225	0.831657	3.27016	0.00107486	0.0107917
XM_006517283.3	Zfp874b	-1.67947	49.7067	0.513489	-3.27071	0.00107276	0.0107777
NM_001033141.2	Ecscr	1.346	498.531	0.411481	3.27112	0.00107124	0.0107695
NR_029459.2	Sec14l1	1.5836	23.2196	0.483973	3.27209	0.00106756	0.0107396
NM_001195084.1	Plscr2	-2.45083	46.2275	0.748699	-3.27345	0.00106245	0.0106952
NM_183358.4	Gadd45gip1	0.944205	231.967	0.288381	3.27416	0.00105978	0.0106754
NM_001145799.1	Ctla2a	3.24785	256.008	0.991129	3.27692	0.00104946	0.0105784
NM_021299.2	Ak3	-0.850812	443.469	0.259529	-3.2783	0.00104435	0.0105354
NM_009717.2	Neurod6	-1.14716	129.3	0.349931	-3.27826	0.0010445	0.0105354
NM_001304720.1	Vezt	-1.82276	30.3849	0.555935	-3.27873	0.00104274	0.0105315
NM_009395.4	Tnfaip1	0.891474	806.531	0.271818	3.27967	0.00103929	0.0105037
NM_001144992.1	2810459M11Rik	-1.47421	19.637	0.449473	-3.27987	0.00103855	0.0105031
Gm7640	Gm7640	0.914313	41.5286	0.278707	3.28055	0.00103605	0.0104848
NM_021524.2	Nampt	0.801381	1453.35	0.244219	3.2814	0.00103292	0.0104601
NM_001135559.1	Sos2	-0.587427	237.982	0.179005	-3.28162	0.00103211	0.0104588
NM_009174.3	Siah2	1.12903	124.57	0.343991	3.28213	0.00103025	0.0104468
NM_013919.4	Usp21	-0.892215	204.407	0.271787	-3.28277	0.00102794	0.0104303
NM_053074.2	Nup62	0.88309	403.159	0.268925	3.28378	0.00102426	0.0103999
Gm6767	Gm6767	0.490074	570.417	0.149137	3.28606	0.00101599	0.0103228
NM_153458.3	Olfm3	-0.570879	97.2618	0.173725	-3.2861	0.00101584	0.0103228
NM_001357742.1	Rcan2	2.52985	149.309	0.769143	3.28918	0.00100479	0.0102226
XM_011242083.4	Tdrp	-0.745155	438.941	0.226387	-3.29151	0.000996504	0.0101451
XM_030242159.1	Igf2	-0.953501	150.391	0.28963	-3.29213	0.000994305	0.0101294
XM_011248111.4	Armc9	-1.88952	24.4334	0.573947	-3.29216	0.000994226	0.0101294
Gm14130	Gm14130	1.54988	46.8597	0.47049	3.29419	0.000987065	0.0100691
NM_001042592.2	Arrdc4	1.73357	88.58	0.526162	3.29474	0.000985126	0.0100635
NM_001145209.2	Hbs1l	0.92352	22.8011	0.280319	3.29453	0.000985857	0.0100635
Gm5500	Gm5500	0.840618	43.944	0.255146	3.29465	0.000985427	0.0100635
NR_024067.2	Snhg6	1.24618	109.772	0.378152	3.29546	0.000982593	0.0100504
NM_144884.2	Tor1a	0.732872	195.945	0.222374	3.29568	0.000981849	0.0100495
XM_036162178.1	Il1r1	-1.6645	154.541	0.504802	-3.29734	0.00097607	0.00999702
NM_010090.2	Dusp2	3.72881	72.7037	1.13072	3.29774	0.000974674	0.00998942
Gm8783	Gm8783	0.737955	242.221	0.223711	3.29869	0.000971364	0.00996219
NM_001199350.1	Rpl34-ps1	0.433175	1706.64	0.131311	3.29884	0.000970839	0.00996219
XM_006498623.4	Serping1	3.0202	170.19	0.91469	3.30188	0.000960381	0.0098628
NM_001101561.2	Rpl32l	0.624108	327.669	0.188994	3.30227	0.000959069	0.00985595
NM_009515.2	Was	-0.682614	220.677	0.206696	-3.3025	0.000958287	0.00985454
NM_021881.2	Qk	-1.35153	2189.44	0.409041	-3.30415	0.000952661	0.0098033
NM_025630.3	Aggf1	-1.02094	400.932	0.308863	-3.30549	0.000948098	0.00976726
NM_028261.1	Sting1	-1.34395	55.9254	0.406595	-3.30537	0.00094852	0.00976726
XM_006527911.5	Flna	0.760733	474.231	0.230116	3.30587	0.000946815	0.00976287
XR_004934048.1	Wdr11	-0.887423	114.796	0.268415	-3.30616	0.000945851	0.00975952
Rps27a-ps2	Rps27a-ps2	0.613443	1187.89	0.185485	3.30724	0.000942193	0.00972835
XR_004941961.1	Mier1	-3.06792	44.4866	0.927573	-3.30747	0.000941431	0.00972706
XM_036153763.1	Cfap20	-0.402121	183.953	0.121546	-3.30839	0.000938328	0.00970715
NM_026178.2	Mmd	-0.665971	469.338	0.201307	-3.30823	0.000938868	0.00970715
Fam136b-ps	Fam136b-ps	-1.09354	20.1545	0.330547	-3.30826	0.00093877	0.00970715
NM_001359036.1	Fgfr3	-3.39357	59.2865	1.02549	-3.30923	0.000935527	0.00969229
XM_036165469.1	Kmt2e	-4.3254	219.228	1.30684	-3.30981	0.000933601	0.0096789
Gm8730	Gm8730	0.443631	773.269	0.133984	3.31108	0.000929353	0.00964141
XM_030245013.2	Ube2d1	-0.516776	123.6	0.156044	-3.31172	0.000927236	0.00962598
NM_009105.4	Rsu1	-0.493018	499.861	0.148836	-3.31249	0.000924683	0.00960601
XM_006539694.5	Six5	-4.17135	26.0612	1.2592	-3.31271	0.000923963	0.00960506
NM_152915.1	Dner	-0.3747	432.104	0.11308	-3.31359	0.00092105	0.0095813
NM_007808.5	Cycs	0.473945	510.375	0.142939	3.31572	0.000914081	0.00951529
NM_172871.2	Klhl9	-0.642975	469.511	0.193801	-3.31771	0.000907585	0.00945411
NM_001146022.2	Wdfy4	-0.850003	232.113	0.256107	-3.31894	0.000903594	0.00941896
NM_001012324.3	Ecm2	-1.86233	35.7819	0.561103	-3.31905	0.000903257	0.00941896
NM_001368627.1	Efcab14	-0.456257	505.978	0.137443	-3.31961	0.000901444	0.0094094
NM_010763.2	Man1a2	-0.884378	939.301	0.266395	-3.3198	0.000900816	0.00940928
NM_007505.2	Atp5a1	0.432012	3288.14	0.130079	3.32115	0.000896482	0.00937042
NM_001359117.1	Plp1	4.20699	800.503	1.26645	3.32189	0.000894101	0.00935193
NM_026890.2	Ngdn	0.607982	431.209	0.18297	3.32285	0.000891042	0.00932632
Gm10036	Gm10036	0.452508	3745.37	0.136177	3.32294	0.000890752	0.00932632
XM_006505836.5	Dennd2a	-1.04724	71.6409	0.315159	-3.3229	0.000890854	0.00932632
NM_199025.3	Zbtb26	-2.25803	28.4942	0.679478	-3.32319	0.000889941	0.00932632
Rpl9-ps6	Rpl9-ps6	0.493249	2284.52	0.148393	3.32393	0.000887573	0.00931556
NM_172668.3	Lrp4	-0.541305	64.6091	0.162842	-3.32412	0.00088699	0.00931556
NM_183030.2	Smim10l2a	-0.883193	109.981	0.26567	-3.32439	0.000886106	0.00931296
NM_053134.3	Pcdhb9	-1.57067	12.2963	0.472401	-3.32486	0.000884615	0.00930369
XM_006524795.4	Atp6v1g2	-4.17781	215.28	1.25623	-3.32567	0.00088206	0.00928321
NR_051981.1	H2-Q5	2.87429	22.7992	0.863692	3.32791	0.000875003	0.00922462
Gm8789	Gm8789	1.0512	107.829	0.315884	3.3278	0.000875356	0.00922462
XM_030244475.2	Scamp5	-0.639326	747.254	0.192097	-3.32814	0.000874281	0.00922462
NM_175179.4	Amer1	-1.2248	85.248	0.36807	-3.32763	0.000875889	0.00922462
XM_006534274.5	Slc25a35	-0.689946	47.9618	0.20726	-3.32889	0.000871929	0.00920832
NM_178668.3	Pde12	0.993944	90.6331	0.298564	3.32909	0.000871316	0.00920821
NM_010139.3	Epha2	2.06731	59.5179	0.62055	3.33142	0.000864041	0.00913765
NM_009546.2	Trim25	2.17443	96.6279	0.652394	3.33301	0.000859121	0.00909192
NM_080455.3	Tshz2	2.18449	105.355	0.654876	3.33574	0.000850731	0.00900937
NR_151712.1	Sft2d2	-0.782843	780.296	0.234458	-3.33895	0.000840946	0.00891193
NM_007915.6	Ei24	-0.469575	218.987	0.140614	-3.33945	0.000839438	0.00890212
XR_001779958.3	Tada2a	-1.04649	105.783	0.31334	-3.33978	0.000838459	0.00889792
Gm6055	Gm6055	0.540466	169.23	0.161797	3.34039	0.000836609	0.00888446
XM_036156408.1	Nlk	-0.831871	450.354	0.24903	-3.34045	0.000836438	0.00888446
XM_011249627.3	AB010352	-1.43168	25.8405	0.428581	-3.3405	0.000836266	0.00888446
NM_001101516.2	Gpr25	1.16618	52.4961	0.348813	3.34328	0.000827938	0.00881076
XM_006505564.5	Cdca3	2.33718	17.3626	0.698888	3.34414	0.000825368	0.00878954
XM_006526055.5	Tmem241	-1.48082	35.8737	0.442727	-3.34476	0.000823527	0.00877605
NM_001159551.1	H13	1.40276	560.096	0.419265	3.34576	0.000820564	0.00875058
NM_008248.3	Hint1	0.54503	1968.25	0.162848	3.34687	0.000817284	0.0087217
XM_036159225.1	Nup50	1.02318	270.472	0.305658	3.34747	0.000815534	0.00871199
NM_001102430.1	Arfgef1	-0.601598	298.78	0.179722	-3.34738	0.000815804	0.00871199
NM_172307.3	Mbtps2	-0.794033	82.1082	0.23715	-3.34823	0.000813287	0.00869727
Gm3379	Gm3379	0.46024	1504.87	0.137438	3.34871	0.000811886	0.00868837
NM_011784.3	Aplnr	-2.01702	18.1127	0.602214	-3.34933	0.000810064	0.00867496
NM_001025388.2	Eno1b	0.67777	673.334	0.202154	3.35274	0.000800156	0.00857486
NM_012002.3	Cops6	0.416783	364.355	0.124309	3.35279	0.000800025	0.00857486
XM_006518549.5	Fgf14	-4.11154	65.9497	1.22578	-3.35422	0.0007959	0.00854124
NM_178186.3	H2ac11	1.46928	12.6059	0.437961	3.35482	0.000794156	0.00852852
NR_045727.1	B230209E15Rik	-0.576308	210.462	0.171608	-3.35828	0.000784286	0.00842845
NM_016897.3	Timm23	0.599324	114.437	0.178426	3.35894	0.000782415	0.00841426
XM_011244921.4	Msra	0.748064	140.533	0.222583	3.36083	0.000777077	0.00836692
XR_004934056.1	Tial1	-0.988797	176.474	0.294224	-3.3607	0.000777464	0.00836692
NM_133884.2	Gpn2	-2.56421	35.8875	0.762991	-3.36073	0.000777362	0.00836692
NM_007679.4	Cebpd	1.22634	1293.45	0.36476	3.36205	0.000773665	0.00834689
XM_011249866.3	2010315B03Rik	-0.846402	44.9021	0.25176	-3.36194	0.000773964	0.00834689
XM_006526314.2	Arhgap12	-1.02546	131.016	0.304927	-3.36298	0.000771047	0.0083272
NM_007531.2	Phb2	0.628115	664.607	0.186691	3.36446	0.000766942	0.00828873
Gm7488	Gm7488	0.542668	137.48	0.161251	3.36537	0.000764408	0.00826719
NM_001142441.1	Sap18b	0.601633	499.55	0.178726	3.36622	0.00076205	0.00824754
NM_001286944.1	Jund	0.960926	899.417	0.285349	3.36754	0.000758414	0.008214
NM_001359149.1	Lsm7	0.525132	201.674	0.155897	3.36845	0.000755923	0.00819283
XM_030255311.1	Tex261	-0.524944	272.442	0.155815	-3.36902	0.000754365	0.00818175
Gm8172	Gm8172	0.57567	427.961	0.170773	3.37097	0.000749045	0.00812983
NM_133693.2	Rbm42	0.689317	721.186	0.204471	3.37122	0.000748373	0.00812831
XR_004941291.1	Lmna	1.59453	246.335	0.472778	3.37268	0.000744392	0.00809442
XM_006527004.4	Lzts2	-3.75862	74.2835	1.11447	-3.37256	0.000744723	0.00809442
NM_009098.2	Rps8	0.460087	1691.28	0.136332	3.37475	0.000738827	0.00805309
XM_036159845.1	Phldb2	-1.11815	73.8659	0.331349	-3.37455	0.000739358	0.00805309
NM_001082960.1	Itgam	-1.32369	487.501	0.392277	-3.37436	0.000739865	0.00805309
NM_026503.3	Sdhaf4	-0.914267	243.568	0.270881	-3.37516	0.000737722	0.00804696
XM_011250535.4	Zfp940	-1.2776	27.0516	0.378501	-3.37541	0.000737065	0.00804696
NR_015572.2	1810014B01Rik	-1.50822	23.3803	0.446848	-3.37524	0.000737526	0.00804696
XM_006538293.5	C9orf72	0.655576	219.319	0.194106	3.37742	0.000731693	0.00799834
XM_036159030.1	Gm7206	0.426378	241.533	0.12622	3.37805	0.000730024	0.00798582
XM_036157121.1	Gm11954	1.38347	14.0783	0.4094	3.37927	0.000726798	0.00796065
Gm7380	Gm7380	0.652006	148.941	0.192952	3.37911	0.000727202	0.00796065
NR_157369.1	Pex6	-2.66004	105.352	0.786912	-3.38035	0.000723942	0.00793634
NM_001252055.1	Ly6c1	-8.0057	3042.54	2.36787	-3.38098	0.000722289	0.0079239
XM_036161155.1	Gnpda1	-0.890421	134.354	0.263218	-3.38282	0.000717447	0.00787644
NM_008390.2	Irf1	3.96613	999.184	1.17222	3.38343	0.000715878	0.00786487
Gm2451	Gm2451	1.51003	16.1437	0.446162	3.38449	0.000713108	0.00784009
NM_028850.5	Chic2	0.693335	341.699	0.204828	3.38496	0.000711882	0.00783224
Gm11652	Gm11652	0.863754	201.003	0.255117	3.38572	0.00070991	0.00782129
NM_021605.4	Nek7	-0.834298	596.26	0.24643	-3.38554	0.000710374	0.00782129
NM_175397.4	Sp110	1.28251	135.177	0.378766	3.38602	0.000709145	0.00781903
NM_134141.4	Ciapin1	0.525827	358.711	0.155277	3.38638	0.000708208	0.00781434
XM_030245001.1	Adgrg6	-1.69404	31.5628	0.50013	-3.3872	0.000706108	0.0077968
NM_010233.2	Fn1	-0.926015	1006.69	0.273204	-3.38946	0.000700295	0.00773821
NM_013863.5	Bag3	1.2727	408.073	0.375413	3.39012	0.000698614	0.00773209
Gm8599	Gm8599	0.694047	121.201	0.204737	3.38994	0.000699081	0.00773209
NM_001037859.2	Csf1r	-0.977804	14656.4	0.288448	-3.38988	0.000699235	0.00773209
NM_153459.4	Dusp7	-0.94515	478.963	0.278752	-3.39064	0.000697284	0.0077273
NM_001164581.1	Zfp961	-0.920371	65.251	0.271377	-3.39148	0.000695165	0.00770941
NM_133216.3	Xpnpep1	1.09437	254.355	0.322505	3.39334	0.000690471	0.00766293
XM_036156129.1	Rpl6l	0.551239	946.398	0.162338	3.39562	0.000684723	0.00760466
XM_017312239.2	Rras2	-1.34855	200.019	0.397041	-3.39649	0.000682564	0.0075862
XM_006511789.5	Aste1	1.29495	18.8649	0.381138	3.39759	0.000679825	0.00756126
NM_021507.5	Sqor	-0.888119	297.031	0.261382	-3.39778	0.000679359	0.00756126
NM_001039484.1	Kcnj10	-0.800058	235.032	0.235402	-3.39869	0.000677099	0.00754193
NM_010511.3	Ifngr1	-0.398029	1887.05	0.117088	-3.39941	0.000675324	0.00752764
NM_146200.1	Eif3c	0.62693	1432.48	0.184362	3.40054	0.000672535	0.00750203
NM_027357.2	Psmd1	0.650246	2052.08	0.191167	3.40146	0.000670259	0.00748211
NM_020578.3	Ehd3	0.460306	566.83	0.135272	3.40281	0.000666962	0.00745075
NR_038116.1	Cxcl11	4.12737	547.862	1.21253	3.40394	0.000664219	0.00742554
XM_006538300.5	Rnf38	-0.575227	194.418	0.168959	-3.40453	0.000662771	0.00741478
XR_003953740.2	Upp2	-1.09023	53.4416	0.320051	-3.40643	0.000658173	0.00736874
XM_006507927.4	Sbf2	-1.16214	364.89	0.341149	-3.40655	0.000657885	0.00736874
NR_166806.1	Gm15523	-3.78928	16.0207	1.11196	-3.40775	0.000655007	0.00734406
NM_052835.3	Rpl10	0.514508	1209.13	0.150957	3.40831	0.000653655	0.00733429
Srsf3-ps	Srsf3-ps	0.949772	226.761	0.278588	3.40924	0.000651453	0.00731495
NM_023565.3	Cse1l	3.37445	61.7017	0.989273	3.41104	0.000647164	0.00727214
Gm11808	Gm11808	0.454239	2730.72	0.133128	3.41205	0.000644766	0.00725053
NM_183147.2	Sprn	-0.549947	125.056	0.161101	-3.41369	0.0006409	0.00721236
NM_028601.3	Zmiz2	-4.70264	214.516	1.37658	-3.41617	0.000635089	0.00715224
XM_006506544.1	Zfp467	-1.07224	92.3522	0.313639	-3.41871	0.000629192	0.00709106
NM_016710.2	Hmgn5	1.21598	321.852	0.355596	3.41954	0.000627274	0.00707467
Gm12630	Gm12630	0.810839	269.572	0.23707	3.42026	0.000625624	0.00706414
NM_153117.2	9530068E07Rik	0.376622	607.166	0.110116	3.42022	0.000625706	0.00706414
NM_007444.3	Amd2	-0.582571	888.223	0.170335	-3.42014	0.000625878	0.00706414
XM_030245891.2	Cd300a	-0.994864	213.575	0.290864	-3.42038	0.000625348	0.00706414
XM_006503610.4	Crot	-0.832314	118.518	0.243282	-3.42119	0.000623488	0.00705803
NM_001271359.1	Arrb2	1.56076	17.0556	0.455984	3.42284	0.00061971	0.00702476
NM_170599.2	Igsf11	-0.799569	49.9626	0.23361	-3.42267	0.000620089	0.00702476
XM_036155881.1	Poc1b	-1.11366	166.321	0.325256	-3.42397	0.000617142	0.00700177
Gm7331	Gm7331	0.468436	716.67	0.136782	3.42469	0.000615509	0.00698843
XM_011243081.1	Ipcef1	-0.508718	133.871	0.148527	-3.42509	0.000614585	0.00698313
NM_145422.4	Rtcb	0.567947	855.065	0.165792	3.42566	0.000613306	0.00697379
Gm3076	Gm3076	1.52079	42.3262	0.443891	3.42605	0.000612428	0.00696899
Rps24-ps2	Rps24-ps2	0.909344	101.401	0.265309	3.42749	0.000609198	0.0069537
Gm5619	Gm5619	0.633278	73.2518	0.184788	3.42704	0.000610193	0.0069537
NM_007929.2	Emp2	-0.853881	286.175	0.249171	-3.42688	0.000610553	0.0069537
NM_001001183.1	Tmem204	-0.993524	805.832	0.289924	-3.42685	0.000610629	0.0069537
NM_001360457.1	Sorcs1	-1.27674	28.9625	0.372499	-3.4275	0.000609168	0.0069537
NM_001360913.1	Fmo2	-1.30913	128.011	0.381985	-3.42717	0.000609902	0.0069537
NM_013898.3	Timm8a1	0.747226	61.4769	0.217965	3.42819	0.000607621	0.00695054
XR_004936965.1	Gga3	-0.994587	198.518	0.28969	-3.43329	0.000596309	0.00682626
XM_006504146.5	Fryl	-0.801973	159.751	0.23351	-3.43443	0.000593808	0.00680364
NM_008899.2	Pou3f2	-0.981353	92.7234	0.285743	-3.43439	0.000593888	0.00680364
NM_028611.3	Ndufaf7	-0.717894	109.078	0.208988	-3.4351	0.000592346	0.00679618
NM_010185.4	Fcer1g	0.68546	3686.95	0.199524	3.43548	0.00059151	0.00679169
NM_011045.2	Pcna	0.706558	291.681	0.20561	3.43641	0.000589481	0.00677349
XM_006511637.4	Gnai2	-1.202	1227.69	0.349752	-3.43671	0.000588821	0.006771
NM_001163572.2	Tmem170b	-1.45208	131.797	0.422466	-3.43715	0.000587879	0.00676526
XM_036154146.1	Tex30	1.33559	82.8807	0.388535	3.4375	0.000587103	0.00676143
NM_009011.4	Rad23b	0.733699	1334.64	0.213291	3.4399	0.00058193	0.00670691
XM_006513867.5	Tet1	-1.30444	62.8906	0.378692	-3.4446	0.000571909	0.00660032
XM_036157976.1	Larp4b	-3.1685	251.133	0.919888	-3.44444	0.000572249	0.00660032
NM_145452.3	Rasa1	-0.786147	843.552	0.228078	-3.44683	0.000567197	0.00655194
XM_036161340.1	LOC118568354	0.69878	122.775	0.20269	3.44753	0.000565748	0.00654015
Gm8184	Gm8184	1.57091	13.1692	0.455582	3.44814	0.000564462	0.00653023
XM_036159866.1	Ccdc191	-3.47037	27.6125	1.0061	-3.44933	0.000561975	0.00650638
XM_011247577.4	Zfx	-0.474276	222.256	0.137419	-3.45131	0.000557864	0.00646369
Gm12366	Gm12366	0.830743	66.3896	0.240632	3.45233	0.000555759	0.00644853
XM_030252655.2	Dennd2c	-2.42863	32.2356	0.703513	-3.45215	0.000556133	0.00644853
XM_030251054.1	Hoga1	2.36554	18.639	0.685034	3.45317	0.000554032	0.00643393
XM_011241421.4	Slc35b4	-0.528589	181.651	0.153031	-3.45413	0.000552062	0.00641593
XR_004936193.1	Tmtc2	-1.41219	187.623	0.408409	-3.45778	0.000544642	0.00633453
NM_001045526.2	Scimp	1.49398	33.1193	0.431979	3.45845	0.000543297	0.0063237
XM_006529776.5	Niban1	0.658013	46.4344	0.190232	3.45901	0.000542164	0.0063237
Gm6394	Gm6394	0.499983	505.264	0.144566	3.45851	0.00054318	0.0063237
XM_017315378.3	Nr2f1	-0.692953	333.217	0.200363	-3.45848	0.00054323	0.0063237
NM_145398.4	Casd1	-0.803251	246.042	0.232069	-3.46126	0.000537655	0.00627716
NM_026632.4	Rpa3	-2.30531	35.9381	0.666005	-3.4614	0.000537378	0.00627716
XM_030243782.1	Cyp4f18	2.28055	20.8609	0.658674	3.46234	0.000535501	0.00626159
NM_175271.4	Lpar4	-1.00452	80.4438	0.289707	-3.46738	0.000525565	0.00615012
XM_036165653.1	Gm6139	0.804244	49.9289	0.23183	3.46912	0.000522168	0.00611505
XM_006505093.4	Asns	0.924371	239.078	0.266432	3.46945	0.000521526	0.00611223
XM_036162043.1	Zmym3	-0.78193	173.54	0.225351	-3.46982	0.0005208	0.0061084
XM_036158254.1	LOC118568050	-1.15378	19.976	0.332517	-3.46985	0.000520758	0.0061084
Rpsa-ps5	Rpsa-ps5	0.631867	54.4708	0.182	3.4718	0.000516986	0.00607299
XM_006500351.3	Adal	-0.951015	70.1779	0.273791	-3.47351	0.000513706	0.00603911
NM_008538.2	Marcks	-0.850228	8689.15	0.244685	-3.47479	0.00051125	0.00601487
NM_033374.3	Dock2	-0.949064	397.152	0.272932	-3.47729	0.000506509	0.00596368
XR_384613.5	Acap2	-0.690056	86.3275	0.198415	-3.47784	0.000505464	0.00595597
Gm7482	Gm7482	0.702721	140.895	0.202022	3.47844	0.000504333	0.00594724
NM_025817.4	Tril	-1.63884	158.966	0.470992	-3.47954	0.000502267	0.00592745
XM_036162406.1	Slc2a8	-0.662396	105.283	0.190243	-3.48184	0.000497981	0.00588141
NM_001081636.1	Ccnd3	-5.11518	299.511	1.46848	-3.48331	0.000495254	0.00585374
Gm12671	Gm12671	1.27287	12.5638	0.365306	3.48439	0.000493254	0.00583462
XM_036155440.1	Gm10157	0.918104	773.426	0.263484	3.48448	0.0004931	0.00583462
NR_045868.1	Gm9866	-0.954691	36.4777	0.273957	-3.48483	0.000492458	0.00583424
XM_030247113.2	Akr1c14	-1.99524	37.054	0.572539	-3.4849	0.000492322	0.00583424
NM_001039169.1	Eif4e2	0.961103	180.767	0.27568	3.4863	0.000489751	0.00581118
Slc39a1-ps	Slc39a1-ps	0.680662	386.686	0.195063	3.48945	0.000484009	0.00574751
XM_036165500.1	Coq2	-0.493434	165.725	0.141402	-3.4896	0.000483751	0.00574751
NM_001167730.1	Rad18	2.48682	20.6607	0.712337	3.49108	0.000481078	0.00572161
Gm8545	Gm8545	1.41157	15.4882	0.404283	3.49153	0.000480261	0.00571815
XM_006510825.4	Mras	-0.686235	578.8	0.196547	-3.49145	0.000480413	0.00571815
Gm7432	Gm7432	0.747983	54.392	0.214154	3.49273	0.000478104	0.00569955
XR_004933721.1	Gm38863	-2.49886	52.4495	0.71537	-3.4931	0.000477445	0.00569614
XM_036155671.1	Naca	0.436497	477.803	0.124902	3.49471	0.000474576	0.00566634
NM_026017.2	Ctdnep1	0.59392	383.624	0.169872	3.49627	0.00047181	0.00563772
XM_006509556.4	Fkbp8	-3.56093	292.956	1.01846	-3.4964	0.000471584	0.00563772
NM_133887.4	Stx12	1.15543	860.018	0.330362	3.49747	0.0004697	0.00562131
NM_028139.5	Atxn7l1	-1.06859	83.338	0.305268	-3.50051	0.000464372	0.0055619
NM_013647.2	Rps16	0.561881	2499.71	0.160466	3.50156	0.00046254	0.00554431
Gm4705	Gm4705	0.497553	378.846	0.141896	3.50647	0.000454091	0.00544731
NM_024173.2	Atp6v1g1	0.818843	1059.25	0.233477	3.50717	0.000452892	0.00543719
XM_011249187.2	Mmd	1.02487	41.548	0.292054	3.50917	0.0004495	0.00540072
NM_013807.3	Plk3	1.02899	144.38	0.293133	3.51033	0.000447552	0.00538154
XM_017315473.3	6720489N17Rik	-2.18682	14.428	0.62284	-3.51104	0.000446357	0.0053714
XM_006495512.4	Sulf1	-1.13865	34.9003	0.324196	-3.51223	0.000444357	0.00535156
Gm5513	Gm5513	0.777013	91.749	0.221112	3.51412	0.000441217	0.00531794
NM_145610.2	Ppan	0.96932	73.3957	0.275745	3.51528	0.000439294	0.00529894
NM_145491.2	Rhoq	-0.816792	625.524	0.232351	-3.51534	0.000439195	0.00529894
NM_010734.2	Lst1	-1.64769	343.781	0.468707	-3.51539	0.000439112	0.00529894
NM_146126.4	Sord	-0.688257	151.318	0.195667	-3.5175	0.000435635	0.00526728
NM_001134717.2	Mtrfr	-1.95827	73.2285	0.556681	-3.51777	0.000435197	0.00526616
NM_001081549.2	Rcan1	1.75112	791.727	0.497757	3.51803	0.000434769	0.00526515
NM_013725.4	Rps11	0.570657	769.297	0.162199	3.51826	0.000434393	0.00526478
NR_003508.1	Mx2	1.37139	25.7235	0.389646	3.51957	0.000432243	0.00524288
NM_009888.3	Cfh	-1.05942	989.129	0.301007	-3.51958	0.000432235	0.00524288
Gm11658	Gm11658	2.02032	28.6592	0.57371	3.5215	0.000429119	0.00521327
LOC118567709	LOC118567709	0.916659	301.34	0.260298	3.52158	0.000428988	0.00521327
NM_026598.3	Ebpl	-0.781408	137.91	0.221813	-3.52282	0.00042698	0.00519555
NM_001014981.1	Wdr7	-2.93218	123.701	0.8323	-3.52298	0.000426716	0.00519555
NM_025677.3	Tsen15	-0.499296	102.035	0.141538	-3.52764	0.000419277	0.00510996
Amd-ps7	Amd-ps7	-0.579258	254.352	0.16417	-3.52841	0.000418062	0.00509964
XM_036158670.1	Ccdc66	-3.17357	50.3953	0.899439	-3.52839	0.000418096	0.00509964
NM_001025561.3	Pus1	0.786207	92.021	0.222796	3.52882	0.000417414	0.00509946
NR_168613.1	Pxdc1	0.916309	253.507	0.259588	3.52986	0.000415784	0.00508362
NM_153159.2	Zc3h12a	1.90187	50.7293	0.53806	3.53468	0.000408264	0.00499567
NM_029391.2	Rab4b	0.517328	465.127	0.146328	3.53539	0.00040717	0.00498628
NM_020510.2	Fzd2	-1.2482	73.3417	0.352619	-3.53979	0.000400442	0.00491011
XM_036156104.1	Nuak1	-1.5783	487.977	0.44589	-3.53967	0.000400628	0.00491011
Gm7688	Gm7688	0.860608	140.218	0.243048	3.5409	0.00039877	0.00489519
XR_003946562.2	Tmem143	-1.24547	54.5677	0.351589	-3.54242	0.000396481	0.004871
NM_009834.2	Noct	1.25423	188.617	0.353918	3.54385	0.000394333	0.00485038
NM_021505.3	Anapc5	-0.780009	71.4238	0.220109	-3.54375	0.000394485	0.00485038
XM_017316761.2	Snap25	-3.93707	1059.29	1.10996	-3.54703	0.0003896	0.00479806
XR_001780808.3	Carmil1	-1.03385	54.9456	0.291213	-3.55016	0.000384996	0.00474517
NM_001142642.1	Fbrsl1	-0.850685	94.071	0.239537	-3.55138	0.000383219	0.00472781
XM_006497670.4	Hnmt	-0.855821	82.6458	0.240985	-3.55134	0.000383277	0.00472781
XM_006524152.4	Plcl2	-2.50795	50.3808	0.705548	-3.55462	0.000378528	0.00467678
NR_015551.1	Rab10os	1.05138	28.7747	0.295671	3.55591	0.000376671	0.0046576
XM_036153836.1	Rab3a	-1.44096	19.658	0.405044	-3.55754	0.00037434	0.00463253
NM_007913.5	Egr1	1.22503	1092.07	0.344212	3.55895	0.000372347	0.00461161
NM_025521.3	2310011J03Rik	0.613697	211.188	0.172402	3.55969	0.0003713	0.00460237
NM_201351.2	Cyb561a3	-3.39368	105.442	0.95291	-3.56139	0.000368897	0.0045763
Rps10-ps1	Rps10-ps1	0.499704	2284.21	0.140242	3.56315	0.000366431	0.0045494
XM_006517154.4	Pcsk1	-1.3339	29.2931	0.374333	-3.56341	0.000366066	0.0045494
XM_011240000.3	Bche	-2.59934	56.8874	0.729489	-3.56324	0.000366309	0.0045494
XR_003947337.2	Ist1	0.694931	848.383	0.194971	3.56428	0.000364852	0.00454087
XM_017319227.3	Ppp6c	1.58536	165.619	0.444744	3.56466	0.000364323	0.00453799
Rpl9-ps4	Rpl9-ps4	0.491163	643.739	0.137771	3.56508	0.000363748	0.00453452
NM_183195.2	Marveld1	0.834423	151.464	0.23399	3.56606	0.000362389	0.00452128
NM_011782.2	Adamts5	2.47705	49.7326	0.694354	3.56742	0.00036052	0.00450163
XM_030252162.2	Pam	-0.931719	329.785	0.261086	-3.56863	0.000358857	0.00448454
NM_028632.2	Fcf1	0.885395	311.496	0.247902	3.57156	0.000354867	0.00443831
NM_007659.4	Cdk1	1.43134	64.4313	0.400565	3.57332	0.000352486	0.00441214
NM_011716.2	Wfs1	0.717423	104.858	0.200746	3.57378	0.000351858	0.0044079
NM_053214.2	Myo1f	-1.75959	270.064	0.492194	-3.57499	0.000350238	0.00439121
NM_029972.4	Ermn	-1.06421	165.883	0.297637	-3.57555	0.000349496	0.00438549
NM_001177544.2	H2ac23	1.22604	251.539	0.342853	3.57601	0.000348882	0.0043814
NM_007853.5	Degs1	0.734586	573.726	0.205339	3.57743	0.000346985	0.00436116
NM_001081344.2	Stxbp5	-0.929183	193.715	0.259715	-3.57771	0.00034662	0.00436016
NM_025444.2	Taf13	0.788559	251.437	0.220366	3.57841	0.000345696	0.00435212
NM_011428.3	Snap25	-4.47505	1180.58	1.25004	-3.57992	0.0003437	0.00433057
NM_009730.3	Atrn	-0.779331	211.308	0.217671	-3.58032	0.00034317	0.00432745
XR_001780064.2	Cenpv	-0.918168	108.368	0.256357	-3.5816	0.000341497	0.00430992
XM_006505143.4	Zfp800	-1.18212	58.8297	0.330038	-3.58178	0.000341267	0.00430992
NM_010325.3	Got2	0.589123	793.51	0.164451	3.58235	0.000340512	0.0043046
NM_001130408.1	Arf1	0.416736	1986.84	0.11628	3.58392	0.000338479	0.00428245
Cbx3-ps7	Cbx3-ps7	-0.491529	618.107	0.137141	-3.58412	0.000338215	0.00428245
NM_008033.4	Fnta	-0.756293	547.697	0.211023	-3.58393	0.000338457	0.00428245
Gm15785	Gm15785	0.520849	211.769	0.145294	3.58481	0.000337329	0.00427853
NM_001372437.1	Ifi206	3.00151	54.8635	0.837014	3.58598	0.000335815	0.00426286
NM_007553.3	Bmp2	2.73714	221.839	0.76312	3.58678	0.000334785	0.00425333
NM_010426.2	Foxf1	0.958039	309.132	0.266952	3.58881	0.000332189	0.00422387
Gm7384	Gm7384	0.58535	233.973	0.163067	3.58964	0.000331136	0.00421398
XM_006501088.5	Mcl1	1.07915	105.401	0.3006	3.58998	0.000330704	0.00421336
XM_006516473.3	Dip2c	-1.45248	67.6099	0.404601	-3.5899	0.000330811	0.00421336
NM_025464.3	Tmem218	-1.03415	64.4698	0.287782	-3.59352	0.000326241	0.0041621
XR_001785519.3	Mettl21a	-0.877281	79.4627	0.244051	-3.59467	0.000324806	0.00414725
NM_011819.3	Gdf15	6.46641	117.195	1.79831	3.59583	0.000323363	0.00413412
XM_006508734.3	Rasa3	-0.710379	244.862	0.197563	-3.59571	0.000323507	0.00413412
XM_036163064.1	Ciart	2.15769	82.5615	0.599907	3.59671	0.000322271	0.00412524
Gm10263	Gm10263	0.559419	567.338	0.155409	3.59965	0.000318647	0.00408227
NM_172310.2	Tarsl2	-0.871678	62.7176	0.241968	-3.60245	0.000315232	0.0040419
XM_006514696.5	Gpr75	-2.01761	14.2885	0.559998	-3.60289	0.000314701	0.00403849
XM_006529757.5	Hmcn1	-2.82356	45.8435	0.783446	-3.60403	0.000313321	0.00402416
NM_001252626.1	Ptgr2	-2.25123	124.205	0.624605	-3.60425	0.000313055	0.00402412
NM_172086.2	Rpl32	0.673789	3176.73	0.186914	3.60481	0.000312386	0.00401891
XM_006512160.4	Trank1	1.52643	90.9439	0.423311	3.60593	0.000311033	0.00400488
NM_178185.2	H2ac24	1.23159	242.219	0.341339	3.60813	0.000308409	0.00397444
Gm6474	Gm6474	0.919933	38.6853	0.254865	3.60949	0.0003068	0.00395705
XM_006499477.5	Tspan18	-1.21855	96.5549	0.337562	-3.60986	0.000306358	0.00395468
XM_036152467.1	Gm10224	0.615513	193.608	0.170474	3.61059	0.000305502	0.00394697
NR_037854.1	Atp6v0c-ps2	0.728147	4037.82	0.201557	3.61261	0.000303126	0.00391959
NM_016739.3	Caprin1	-1.56211	143.125	0.432294	-3.61355	0.000302037	0.00390882
NM_008901.2	Pou3f4	-1.30925	53.0221	0.362136	-3.61535	0.000299947	0.00388506
NM_026617.3	Tmbim4	0.581786	574.601	0.160897	3.61588	0.00029933	0.00388193
XM_017320453.3	Rbm12b2	-1.48387	65.7153	0.410388	-3.61577	0.000299451	0.00388193
XM_006506219.4	Tpk1	-1.29876	50.1902	0.359017	-3.61754	0.000297415	0.00386209
NM_011100.4	Prkacb	-0.420975	1602.04	0.116339	-3.61852	0.000296296	0.00385084
Gm5425	Gm5425	0.555101	116.896	0.153376	3.61921	0.0002955	0.00384377
NM_145538.2	Peds1	0.993853	130.709	0.274546	3.61999	0.000294619	0.00383789
XM_030242769.2	Tomm40	0.454286	284.634	0.125499	3.61983	0.000294797	0.00383789
NM_011968.3	Psma6	0.770203	1094.14	0.212725	3.62065	0.000293869	0.00383234
Gm4987	Gm4987	0.698181	66.4414	0.192787	3.62151	0.000292884	0.00382276
NM_001005916.2	Zbtb9	-0.975152	47.7648	0.269224	-3.62208	0.000292239	0.0038176
NM_009119.3	Sap18	0.490471	481.955	0.135362	3.62339	0.000290767	0.00380162
NM_029100.2	Selenon	0.529987	204.73	0.146238	3.62415	0.000289914	0.00379372
XM_006509240.5	Mtus1	-1.39105	894.903	0.383823	-3.6242	0.000289863	0.00379372
Gm5791	Gm5791	0.644679	229.064	0.177852	3.6248	0.000289185	0.00379068
Rpl36-ps2	Rpl36-ps2	0.570087	1362.41	0.157231	3.6258	0.000288068	0.00377929
NM_153090.2	Fcrl1	-1.5286	40.0899	0.421563	-3.62604	0.000287802	0.00377903
NM_001355759.1	Mrps21	-0.420495	426.008	0.115895	-3.62823	0.000285369	0.00375032
Cbx3-ps8	Cbx3-ps8	-0.437715	283.933	0.120541	-3.63124	0.000282065	0.00371009
NM_001361534.1	Atp6v0c	0.715842	3470.07	0.197122	3.63147	0.000281811	0.00370995
NM_175123.5	1110051M20Rik	-0.499851	115.434	0.137625	-3.63197	0.000281266	0.00370596
NM_011707.2	Vtn	-1.35056	130.645	0.371711	-3.63335	0.000279765	0.00368937
NM_025780.4	Thap2	-1.74527	87.0514	0.480274	-3.63391	0.000279156	0.00368452
NM_001254946.1	BC035044	-0.862161	140.275	0.237183	-3.635	0.000277977	0.00367214
NM_011348.2	Sema3e	-1.33698	61.0494	0.367765	-3.63542	0.000277529	0.00366939
NM_008625.2	Mrc1	-1.45787	115.238	0.400876	-3.63671	0.000276138	0.00365417
NM_001198823.1	App	7.78841	1244.98	2.14129	3.63725	0.000275566	0.00364976
Uba52-ps	Uba52-ps	0.472413	315.525	0.129823	3.63891	0.000273799	0.0036295
NM_009795.4	Capns1	0.41101	2300.97	0.112894	3.64066	0.000271943	0.00360802
NM_173785.6	Iba57	2.5313	27.9598	0.69502	3.64205	0.000270478	0.00359172
NM_007657.4	Cd9	0.796501	1112.87	0.218589	3.64382	0.000268619	0.00357014
XM_011242999.3	Cmtm8	3.43777	90.6314	0.943315	3.64435	0.000268067	0.00356705
NR_003634.2	Rps4l	0.912154	353.656	0.250298	3.64427	0.000268154	0.00356705
NM_010217.2	Ccn2	1.50466	557.225	0.412756	3.64539	0.000266986	0.00355772
NM_010851.3	Myd88	0.728604	407.347	0.199857	3.64563	0.000266736	0.00355749
NM_177632.3	Fam43a	1.11762	467.642	0.306546	3.64586	0.0002665	0.00355745
XM_006540637.4	Herc2	-0.717868	746.899	0.196765	-3.64836	0.000263924	0.00352614
NM_001042605.1	Cd74	3.13524	153.415	0.858564	3.65172	0.000260487	0.00348328
NM_022816.2	Acot10	1.47383	42.7231	0.403589	3.65182	0.00026039	0.00348328
NM_001001881.2	2510009E07Rik	-1.00149	545.637	0.273859	-3.65695	0.000255232	0.00341899
NM_001304362.1	Cgnl1	0.751137	421.833	0.205308	3.65859	0.00025361	0.00340024
NM_145475.4	Cerk	-0.452938	479.389	0.123748	-3.66017	0.000252051	0.00338232
Gm12966	Gm12966	1.25434	262.985	0.342571	3.66156	0.000250685	0.00336694
NM_012037.2	Vat1	1.04272	225.686	0.284632	3.66339	0.000248898	0.00334588
NM_001111320.1	Idh1	-0.585448	274.468	0.159745	-3.66488	0.000247456	0.00333166
NM_172672.2	Ganc	-1.36787	189.442	0.373256	-3.66471	0.000247622	0.00333166
LOC118568250	LOC118568250	-2.03729	66.6987	0.555554	-3.66712	0.000245294	0.00330616
NM_008609.4	Mmp15	-1.5595	88.5135	0.425098	-3.66856	0.000243922	0.00329058
NM_001122992.1	Gmeb1	-0.569025	140.243	0.155049	-3.66996	0.000242588	0.00327547
NM_008047.5	Fstl1	0.678568	369.932	0.184712	3.67365	0.000239109	0.00323136
XM_036153257.1	Abhd2	0.82339	2985.29	0.224091	3.67436	0.000238447	0.00322526
NM_019979.2	Selenok	0.545309	1208.96	0.148255	3.67818	0.000234904	0.00318015
NM_009373.3	Tgm2	0.831617	3250.73	0.226037	3.67912	0.000234036	0.00317122
Gm10233	Gm10233	0.558519	92.1847	0.151684	3.68211	0.000231308	0.00313704
XM_030254969.2	Itpkb	-2.68391	316.496	0.728747	-3.68291	0.000230589	0.00313007
XR_003946428.2	Tmc7	-0.890847	128.348	0.241752	-3.68497	0.000228733	0.00310764
NM_026124.3	Rab5if	0.58092	683.35	0.157633	3.68526	0.000228468	0.0031068
NM_024273.2	Timmdc1	-1.03315	87.8013	0.280294	-3.68597	0.000227837	0.00310098
NM_023544.5	Rsc1a1	2.0059	143.052	0.544053	3.68696	0.00022695	0.00309167
XM_006497394.5	Pip4k2a	-1.24344	871.65	0.33705	-3.68919	0.000224971	0.00306743
Rpl10a-ps1	Rpl10a-ps1	0.473133	1609.13	0.128209	3.69032	0.000223971	0.00305653
NM_001024602.3	Cep170b	-3.86654	287.84	1.04663	-3.69426	0.000220526	0.00301222
XM_006538500.2	Alpl	-3.18405	78.7984	0.861632	-3.69537	0.000219568	0.00300181
Gm9791	Gm9791	1.28514	23.2355	0.34759	3.69729	0.00021791	0.00298182
NM_023750.2	Zfp84	-0.855443	185.04	0.23136	-3.69745	0.000217779	0.00298182
Gm12435	Gm12435	1.66499	66.0876	0.450245	3.69797	0.000217333	0.00297925
NM_026753.2	Ciao2b	0.513884	319.233	0.138954	3.69822	0.000217118	0.00297898
NM_007976.3	F5	-1.19748	55.8138	0.323713	-3.69921	0.000216276	0.00297009
NM_025994.3	Efhd2	0.6387	3338.45	0.172609	3.70027	0.000215372	0.00296035
Rps16-ps2	Rps16-ps2	0.558797	3874.94	0.15099	3.70088	0.000214855	0.0029559
XM_036160747.1	Mrps18b	0.673954	107.747	0.182092	3.70116	0.000214614	0.00295525
LOC118567981	LOC118567981	0.937518	41.8608	0.253204	3.70262	0.000213383	0.00294095
NM_026615.4	Urm1	0.666111	299.963	0.179855	3.7036	0.000212563	0.00293229
XM_030252421.2	Gbp2b	1.86799	456.964	0.504104	3.70556	0.000210921	0.00291227
Gm11824	Gm11824	0.676232	50.0791	0.18229	3.70966	0.000207538	0.00286816
NM_001282737.1	Magoh	0.93125	500.022	0.250958	3.71077	0.000206626	0.00285814
XR_001784138.2	Slc35a1	-1.12927	179.276	0.304223	-3.71197	0.000205653	0.00284726
NM_027425.4	Rufy2	-0.745806	403.301	0.200844	-3.71335	0.000204532	0.00283431
XM_017316943.2	Upk1b	-4.33872	29.1945	1.16809	-3.71438	0.000203704	0.0028254
XM_011242496.3	Rnf214	-0.522893	983.971	0.140693	-3.71655	0.000201959	0.00280374
Gm14048	Gm14048	0.658041	301.293	0.176954	3.71872	0.000200231	0.00278228
XM_036158096.1	Bdp1	-1.00789	206.373	0.270909	-3.72041	0.000198902	0.00276633
NM_008284.2	Hras	3.3414	92.5789	0.897918	3.72128	0.000198218	0.00275933
Rps6-ps1	Rps6-ps1	0.72853	285.194	0.195713	3.72244	0.000197304	0.00274911
NM_009026.5	Rasd1	4.16103	695.48	1.11653	3.72674	0.00019397	0.00270513
XM_006495848.4	Neurl3	1.05309	200.081	0.282524	3.72744	0.000193436	0.00270015
NM_001162908.1	Sesn1	4.47247	141.026	1.19897	3.73027	0.000191271	0.0026746
NM_177662.3	Ctso	-1.07695	181.435	0.288721	-3.73006	0.000191431	0.0026746
NM_178035.5	Fads6	-0.825866	75.0443	0.221311	-3.7317	0.000190188	0.00266211
NM_024434.6	Lap3	1.07839	815.038	0.288935	3.73228	0.000189755	0.00265849
XM_030249438.2	Tcf19	0.982858	51.8176	0.263198	3.73429	0.000188246	0.00263976
NM_053273.2	Ttyh2	-0.927354	265.188	0.24829	-3.73496	0.000187745	0.00263516
Gm13167	Gm13167	1.10506	49.8024	0.295833	3.73543	0.000187395	0.00263267
NM_028081.2	Lrif1	-4.72909	42.9641	1.26593	-3.73565	0.000187228	0.00263267
NM_011289.3	Rpl27	0.536628	472.15	0.143618	3.7365	0.000186601	0.00262634
NM_009740.2	Bcl10	0.409385	558.361	0.109511	3.73831	0.000185265	0.00260995
XM_036162050.1	Tspan6	1.14479	103.689	0.306058	3.74045	0.000183693	0.00259019
XM_036154321.1	Tepp	-1.41816	54.0584	0.379052	-3.74132	0.000183053	0.00258355
XM_030245179.1	Nap1l1	1.11673	46.9858	0.298437	3.74194	0.000182607	0.00257964
NM_007414.3	Adprh	0.272212	845.158	0.0727353	3.7425	0.000182196	0.00257622
NM_013765.2	Rps26	0.619325	1801.79	0.165192	3.74913	0.00017745	0.00251143
Gm6311	Gm6311	0.883232	54.5532	0.235344	3.75293	0.000174776	0.00247589
NM_001378824.1	Evi5	-0.966354	475.492	0.257479	-3.75314	0.000174635	0.00247589
NR_152261.1	Gm4750	0.732191	196.287	0.195011	3.75462	0.000173605	0.00246386
NM_025370.3	Prxl2c	-1.16892	170.453	0.311321	-3.75472	0.000173538	0.00246386
NM_153142.3	Slc35e4	1.08352	220.187	0.288348	3.75768	0.000171497	0.00243849
NM_001368741.1	H2-Q6	3.22504	74.7936	0.858138	3.75818	0.000171155	0.00243588
Gm14253	Gm14253	0.550934	193.558	0.146592	3.75829	0.000171075	0.00243588
NM_010928.2	Notch2	-0.587385	305.742	0.15616	-3.76144	0.000168939	0.00240884
NM_146057.3	Dap	-0.563727	457.211	0.149806	-3.76305	0.000167853	0.00239559
Gm16209	Gm16209	0.560776	109.827	0.148962	3.76456	0.000166841	0.00238338
XM_030250436.2	Etf1	0.75769	322.008	0.201156	3.76667	0.000165439	0.00236556
Eif1-ps2	Eif1-ps2	1.70888	1178.84	0.45349	3.76828	0.000164377	0.00235258
NM_020011.5	Sphk2	-1.27254	379.349	0.337573	-3.76967	0.000163466	0.00234173
XR_871431.4	Lilrb4a	3.40476	79.8338	0.903085	3.77014	0.000163155	0.00233947
XM_006527472.4	Pik3ap1	0.540655	474.057	0.143279	3.77344	0.000161012	0.00231092
XM_036159554.1	Slc38a2	1.10514	897.278	0.292839	3.77388	0.000160729	0.00230902
NR_027818.1	1500011B03Rik	1.72472	154.497	0.456933	3.77456	0.000160292	0.00230491
Btf3-ps4	Btf3-ps4	1.10795	73.9311	0.293485	3.77517	0.0001599	0.00230144
NM_023596.3	Slc29a3	-0.854271	587.53	0.226212	-3.77641	0.000159103	0.00229214
XM_030243770.1	Klf7	0.890276	278.536	0.235696	3.77722	0.000158588	0.00228812
NM_019821.2	Gltp	-0.659423	615.3	0.174585	-3.77708	0.000158675	0.00228812
XM_030249256.2	Rtp4	1.04556	817.742	0.276779	3.77761	0.000158338	0.00228759
XM_036156152.1	Gm10145	1.60884	24.4853	0.425779	3.77858	0.000157727	0.00228092
NM_177686.4	Clec12a	-4.06602	16.4717	1.07584	-3.77938	0.000157218	0.00227571
NM_001166388.1	Ptp4a3	-0.564294	468.442	0.149188	-3.78244	0.0001553	0.00225009
XM_036155425.1	Gstp-ps	-0.461388	419.609	0.121885	-3.78544	0.000153435	0.00222724
NM_145930.3	AW549877	-0.708239	188.849	0.187107	-3.78521	0.000153578	0.00222724
NM_025580.2	Pnkd	-1.06923	89.9456	0.282473	-3.78524	0.000153562	0.00222724
NM_170779.2	Wwc1	-0.806931	225.038	0.213007	-3.78828	0.000151691	0.00220617
Gm6061	Gm6061	0.669797	1097.2	0.176782	3.78882	0.000151365	0.00220352
NM_001081672.2	Fam43b	-0.857786	55.0015	0.226319	-3.79016	0.000150553	0.00219379
NM_001109995.1	Eftud2	0.954675	454.712	0.251769	3.79187	0.000149519	0.00218081
Gm7027	Gm7027	0.532067	284.786	0.140219	3.79454	0.000147916	0.00215948
NM_011876.3	Twf2	-0.714945	434.523	0.188196	-3.79893	0.000145322	0.00212365
NM_008640.2	Laptm4a	1.3056	179.809	0.343316	3.80292	0.000143002	0.00209174
Gm13592	Gm13592	1.68898	23.4679	0.443951	3.80444	0.000142127	0.00208095
XM_017316357.3	Plcb2	-1.67918	94.3078	0.44105	-3.80724	0.000140528	0.00205951
NM_026329.2	Polr2g	0.425727	448.379	0.111808	3.80766	0.000140286	0.00205794
Gm13232	Gm13232	1.11029	47.7864	0.291544	3.80832	0.000139915	0.00205605
Rpl19-ps7	Rpl19-ps7	0.692769	1750.93	0.181889	3.80875	0.000139671	0.00205605
NR_074087.1	Tle5	-4.1838	292.749	1.09865	-3.80813	0.000140023	0.00205605
NM_020052.2	Scube2	-4.26727	22.7137	1.12049	-3.8084	0.000139868	0.00205605
Gm7493	Gm7493	0.656907	69.3049	0.172421	3.80991	0.000139018	0.00204917
Gm20875	Gm20875	1.194	35.986	0.313291	3.81116	0.000138317	0.0020408
NM_019640.5	Pitpnb	-2.19682	149.242	0.576178	-3.81275	0.00013743	0.00202968
NM_001101430.2	Psmg4	1.7969	97.0463	0.470738	3.81719	0.000134978	0.0019954
NM_145851.2	Cables2	-0.723589	121.365	0.189458	-3.81925	0.000133858	0.00198076
XR_385538.4	Gm30571	1.59944	136.405	0.418545	3.82142	0.000132686	0.00196532
NM_028319.1	Zfp518a	-0.725314	107.71	0.189705	-3.82337	0.000131638	0.0019517
NM_025606.3	Mrpl16	0.630803	203.799	0.164726	3.82941	0.000128453	0.00190786
NM_011296.3	Rps18	0.540828	1148.01	0.141213	3.82988	0.000128207	0.00190786
NM_025807.3	Slc16a9	-1.69531	80.3424	0.442732	-3.82921	0.000128557	0.00190786
NM_008130.3	Gli3	-1.80053	24.9035	0.470196	-3.82932	0.000128499	0.00190786
NM_001081114.2	Clip3	-3.35446	322.372	0.875913	-3.82967	0.000128313	0.00190786
NM_016906.4	Sec61a1	0.89531	1179.5	0.233631	3.83215	0.00012703	0.00189441
XM_030242131.2	Fbl	1.10859	244.508	0.28923	3.8329	0.00012664	0.00189043
XM_036156767.1	Tmem104	1.44544	75.1016	0.37704	3.83365	0.000126258	0.00188658
NM_145622.2	Zfp65	-0.759781	66.9897	0.198146	-3.83446	0.000125842	0.00188221
XM_011247829.4	Wnk3	-3.75625	30.1291	0.978885	-3.83727	0.000124408	0.00186258
Rps2-ps13	Rps2-ps13	1.04877	62.7305	0.273228	3.83846	0.000123809	0.00185543
NM_010907.2	Nfkbia	1.56633	16303.5	0.407967	3.83934	0.000123364	0.00185113
Gm44705	Gm44705	0.77112	135.36	0.200851	3.83927	0.000123401	0.00185113
NM_025346.1	Rmnd5b	1.03866	318.422	0.270377	3.84154	0.000122267	0.00183774
NM_019755.5	Plp2	2.47248	58.4413	0.642782	3.84653	0.000119801	0.00180244
NM_009712.3	Arsb	-0.978817	468.065	0.254453	-3.84675	0.000119695	0.00180244
NM_212445.2	Poglut3	-1.43313	106.827	0.372561	-3.84669	0.000119725	0.00180244
XM_036156602.1	Abca9	-2.04788	703.389	0.532369	-3.84673	0.000119707	0.00180244
Rpl7a-ps7	Rpl7a-ps7	0.941264	927.12	0.2445	3.84975	0.000118236	0.00178594
Rpl27-ps1	Rpl27-ps1	0.559224	730.217	0.145035	3.85577	0.000115365	0.0017443
Gm20568	Gm20568	0.492645	264.502	0.127672	3.85868	0.000114003	0.0017254
NM_019639.4	Ubc	1.13964	14828.4	0.295135	3.86141	0.000112735	0.00170792
XM_030253667.2	Srrm1	1.68569	42.888	0.436299	3.8636	0.000111728	0.00169434
NM_011292.2	Rpl9	0.609603	315.633	0.157713	3.86528	0.000110963	0.00168441
NM_001166589.1	Eif5a	1.02929	2182.87	0.265973	3.86992	0.000108873	0.00165433
Gm11425	Gm11425	0.466904	189.175	0.120645	3.87007	0.000108805	0.00165433
XM_030252047.2	3300002I08Rik	-1.27176	74.6157	0.328559	-3.87073	0.00010851	0.00165209
NM_009530.2	Atrx	-1.09453	1328.41	0.282614	-3.87289	0.00010755	0.00163912
NM_026554.4	Ncbp2	-1.59016	222.405	0.409735	-3.88094	0.000104052	0.00158738
NM_172507.5	Sh3bgrl2	1.35166	39.8516	0.348203	3.88181	0.000103684	0.00158335
NM_013610.3	Ninj1	1.09043	579.577	0.280906	3.88184	0.000103667	0.00158335
NM_001033208.4	Myzap	3.02293	32.1085	0.778498	3.88303	0.000103163	0.00157856
XR_003954673.1	Gm6485	1.42367	695.321	0.366156	3.88815	0.000101011	0.00154718
XM_036155279.1	Tln2	-0.88316	284.659	0.227065	-3.88947	0.000100465	0.00154117
XM_006499911.5	Ccdc141	-1.20273	621.12	0.309237	-3.88934	0.000100518	0.00154117
Rpl36-ps12	Rpl36-ps12	0.570636	353.133	0.146652	3.89108	9.97971e-05	0.0015332
Gm9354	Gm9354	0.632583	583.871	0.162531	3.89207	9.93935e-05	0.00152854
NR_028264.1	Dleu2	-1.21652	39.6997	0.312551	-3.89221	9.93337e-05	0.00152854
Gm5855	Gm5855	0.847119	276.4	0.217586	3.89326	9.89045e-05	0.00152409
NM_033601.3	Bcl3	1.30712	144.061	0.335706	3.89364	9.87499e-05	0.00152324
NM_019444.2	Ramp2	-0.871894	2678.63	0.223867	-3.89469	9.83226e-05	0.00151818
XM_011248296.4	Clgn	-2.71362	48.9231	0.696485	-3.89616	9.77316e-05	0.00151059
NM_009627.2	Adm	5.4573	766.758	1.39967	3.89899	9.6595e-05	0.00149453
Gm11189	Gm11189	0.886359	33.577	0.227295	3.8996	9.63537e-05	0.00149231
NM_027244.1	Ndufa11	0.45862	803.39	0.117606	3.89963	9.634e-05	0.00149231
NM_153781.1	Pygb	-0.612678	319.373	0.157074	-3.90056	9.59703e-05	0.00148939
NM_020275.4	Tnfrsf10b	2.61664	73.2735	0.670709	3.90131	9.56732e-05	0.00148706
Gm13456	Gm13456	0.519005	6609.56	0.133038	3.90119	9.57224e-05	0.00148706
NM_178045.4	Rassf4	-1.19933	375.928	0.30732	-3.90254	9.51895e-05	0.00148179
NM_010385.2	Pfdn6	0.492232	354.458	0.126099	3.90353	9.47982e-05	0.00147721
NR_164193.1	Rps6-ps4	0.677915	986.992	0.173629	3.90438	9.4467e-05	0.00147355
Gm13237	Gm13237	1.11421	49.7057	0.285349	3.90473	9.43316e-05	0.00147294
XM_006537832.5	Gba2	-1.20514	47.3271	0.307783	-3.91556	9.01942e-05	0.00140978
XM_017315168.2	Eml1	-4.42199	91.9244	1.12908	-3.91645	8.9862e-05	0.00140603
NM_019411.4	Ppp2ca	0.310148	1342.4	0.0790958	3.92116	8.81223e-05	0.00138022
NM_001291892.1	Lilrb4b	3.21187	21.0945	0.818706	3.92311	8.7414e-05	0.00137315
NM_001009575.5	Armcx5	1.29268	192.72	0.329541	3.92267	8.75748e-05	0.00137315
Gm7335	Gm7335	-0.675563	433.3	0.172221	-3.92265	8.7581e-05	0.00137315
Gm10171	Gm10171	0.577919	114.043	0.147276	3.92406	8.70676e-05	0.00136932
NM_133655.2	Cd81	1.12508	128.963	0.286689	3.92438	8.69541e-05	0.00136894
NM_001005341.3	Ypel2	-0.807491	156.591	0.205626	-3.92698	8.60174e-05	0.00135559
NM_153547.6	Gnl3	0.987635	224.235	0.251362	3.92913	8.52524e-05	0.00134592
NM_178684.6	Mapk1ip1l	0.841663	513.56	0.214221	3.92896	8.5315e-05	0.00134592
NM_029555.2	Gstk1	-0.866928	96.5743	0.220603	-3.92981	8.50118e-05	0.00134391
Rps25-ps1	Rps25-ps1	0.545961	1956.08	0.138915	3.93017	8.48865e-05	0.00134332
XM_011242679.3	Igdcc3	-1.78137	30.8177	0.452919	-3.9331	8.3858e-05	0.00132842
NM_012053.2	Rpl8	0.734828	4119.09	0.186799	3.9338	8.36141e-05	0.00132593
NM_024254.3	Katnbl1	-0.694294	208.598	0.176432	-3.93519	8.31326e-05	0.00131967
XM_011250475.3	Zfp583	-1.78786	25.1806	0.454225	-3.93607	8.28261e-05	0.00131617
NR_166920.2	BC002059	1.2887	28.7867	0.327347	3.93681	8.25717e-05	0.00131349
XM_036160100.1	Tbc1d23	1.23004	187.136	0.311822	3.94469	7.9904e-05	0.00127238
NM_010106.2	Eef1a1	0.54538	11346.3	0.138253	3.94481	7.98624e-05	0.00127238
NM_177712.4	Zfp874a	-1.37146	28.4432	0.34747	-3.94698	7.91423e-05	0.00126289
NM_011809.3	Ets2	1.09398	1439.67	0.277115	3.94773	7.88959e-05	0.00126027
Rps10-ps2	Rps10-ps2	0.609718	777.07	0.154411	3.94866	7.85895e-05	0.00125669
XM_030242246.2	Rlbp1	-1.30962	30.4508	0.33155	-3.95	7.81503e-05	0.00125098
NM_007475.5	Rplp0	0.508111	1276.74	0.128611	3.95077	7.79017e-05	0.00124831
XM_006497531.4	Plxdc2	-1.74315	816.214	0.441094	-3.95188	7.75387e-05	0.0012438
XM_036165330.1	Tmed2	-1.44744	27.3919	0.366052	-3.9542	7.67908e-05	0.00123309
NM_010764.2	Man2b1	-0.798458	1103.21	0.201903	-3.95465	7.66454e-05	0.00123205
NM_023203.1	Dctpp1	0.52768	213.64	0.133318	3.95804	7.55664e-05	0.00121599
NM_008564.2	Mcm2	0.769765	86.4039	0.194374	3.96023	7.48763e-05	0.00120616
Gm5786	Gm5786	1.07859	33.5987	0.272115	3.96373	7.37867e-05	0.00118986
XM_036160458.1	Plekhh2	-2.55383	41.127	0.644288	-3.96381	7.37628e-05	0.00118986
NM_133916.2	Eif3b	0.564272	561.219	0.142197	3.96823	7.24078e-05	0.0011701
NM_019932.4	Pf4	-1.40062	65.2138	0.352946	-3.96837	7.23661e-05	0.0011701
NM_021272.3	Fabp7	-1.97485	36.4035	0.496785	-3.97527	7.0299e-05	0.00113843
NR_151719.1	Utp25	-0.873002	101.049	0.21934	-3.98012	6.88796e-05	0.00111662
NM_026438.4	Ppa1	0.80204	330.137	0.201462	3.98111	6.85954e-05	0.0011132
NM_025317.2	Mrpl54	0.689515	213.481	0.172917	3.98755	6.67584e-05	0.00108454
NM_145578.3	Ube2m	0.7633	146.271	0.191199	3.99217	6.54717e-05	0.00106477
NM_173014.2	Lpcat2	-2.4718	1160.89	0.619049	-3.9929	6.52692e-05	0.00106261
XM_006496277.4	Gulp1	-1.48541	48.7981	0.371619	-3.99715	6.41098e-05	0.00104485
XM_030250603.2	Mro	-1.3351	30.5544	0.333986	-3.99748	6.402e-05	0.0010445
XM_006518324.1	Adcy4	0.974426	417.91	0.243627	3.99966	6.34339e-05	0.00103604
NM_031194.5	Slc22a8	-4.7957	506.085	1.19898	-3.99981	6.33925e-05	0.00103604
XM_011240977.4	Tnrc18	-1.08209	237.886	0.270453	-4.00101	6.30725e-05	0.00103235
NM_175451.1	Ckap4	0.846872	419.435	0.211411	4.0058	6.18078e-05	0.00101349
XM_017315559.3	Zfp808	-1.99323	10.9479	0.497608	-4.00562	6.18542e-05	0.00101349
NM_026965.2	Comtd1	-1.26045	110.386	0.314298	-4.01038	6.06217e-05	0.000995435
NM_010188.5	Fcgr3	0.687957	2817.47	0.171303	4.01603	5.91871e-05	0.000972924
NM_001347562.1	Tollip	0.707973	681.818	0.176206	4.01787	5.87255e-05	0.000966376
NR_169016.1	Ccl19-ps2	1.42684	14.9737	0.355029	4.01893	5.84623e-05	0.000966355
NM_026155.3	Ssr3	0.969425	1129.91	0.241249	4.01836	5.8605e-05	0.000966355
Rps15a-ps7	Rps15a-ps7	0.585401	326.965	0.14569	4.01813	5.86609e-05	0.000966355
Gm10053	Gm10053	0.557328	337.153	0.138689	4.01853	5.8562e-05	0.000966355
XM_030246614.1	Prkar2b	-5.74934	171.11	1.43078	-4.01833	5.86113e-05	0.000966355
XM_006506164.5	Dysf	1.66818	151.049	0.415021	4.01951	5.83199e-05	0.000965946
NM_207223.1	Acap3	-2.58816	112.908	0.643098	-4.02453	5.70901e-05	0.000946605
Gm13461	Gm13461	0.609631	398.195	0.151454	4.02519	5.69304e-05	0.000944982
NM_177152.5	Lrig3	-1.30251	53.3529	0.323446	-4.02698	5.64982e-05	0.000938829
XM_030244276.2	Cep126	-1.67077	42.3359	0.41475	-4.02839	5.61597e-05	0.000934222
NM_011029.4	Rpsa	0.668854	862.098	0.165891	4.03189	5.53295e-05	0.000921414
NM_010721.2	Lmnb1	0.859959	274.375	0.213224	4.03312	5.504e-05	0.000917594
Gm10273	Gm10273	0.579538	117.277	0.14368	4.03354	5.4942e-05	0.00091696
XM_036156782.1	Trim65	-1.90369	68.0974	0.471495	-4.03756	5.40091e-05	0.000902378
NM_019682.4	Dynll1	-0.935152	1481.69	0.231522	-4.03914	5.36473e-05	0.000897314
NM_011528.4	Taldo1	0.387901	1451.42	0.095977	4.0416	5.30874e-05	0.000888922
NM_177782.3	Prex1	-2.08543	279.582	0.514945	-4.04981	5.126e-05	0.000859267
NM_145705.3	Tinf2	0.726709	100.195	0.179423	4.05026	5.11606e-05	0.000859109
NM_008917.3	Ppt1	-2.00049	361.446	0.493936	-4.05011	5.11943e-05	0.000859109
NM_172506.2	Boc	-1.43058	39.0965	0.353109	-4.05138	5.09171e-05	0.000856338
XM_036162340.1	Zfp931	-1.4577	40.952	0.35958	-4.05389	5.03735e-05	0.00084813
NM_027307.4	Golm1	-1.02169	902.331	0.251975	-4.05471	5.01957e-05	0.000846069
XM_036166064.1	Ankrd26	-1.76197	76.1484	0.434184	-4.05812	4.94688e-05	0.000834737
NM_013602.3	Mt1	3.2682	8766.24	0.80423	4.06376	4.82887e-05	0.000815727
XM_011244088.3	Pomt2	-1.02288	37.4079	0.251649	-4.06472	4.809e-05	0.00081327
XM_006538495.4	Agrn	-1.22397	349.067	0.30105	-4.06567	4.78948e-05	0.000810867
XM_011247521.4	Emd	0.913644	597.859	0.22462	4.06751	4.75183e-05	0.000805385
NM_025443.2	Pno1	0.933757	182.307	0.22949	4.06884	4.72475e-05	0.000801685
NM_133746.5	Calhm2	-1.25138	106.647	0.307385	-4.07106	4.67996e-05	0.000794969
XM_036160692.1	Brd4	-4.71458	202.742	1.15806	-4.0711	4.67926e-05	0.000794969
Gm10709	Gm10709	0.720456	67.8857	0.176924	4.07212	4.65862e-05	0.000793109
XM_030254091.1	Cdk6	1.99623	190.369	0.49018	4.07246	4.65201e-05	0.000792867
Rpl18-ps2	Rpl18-ps2	0.606204	701.902	0.148797	4.07402	4.6208e-05	0.000788427
NM_001077410.1	Gimap8	-2.21857	118.693	0.544389	-4.07533	4.59484e-05	0.000784874
XM_006517191.4	Exoc3	-0.744358	312.199	0.182502	-4.07864	4.53008e-05	0.00077468
XM_011243063.2	Ccr2	-2.32112	42.6414	0.569008	-4.07925	4.51818e-05	0.00077351
Gm13991	Gm13991	-0.727141	192.477	0.178238	-4.07962	4.51097e-05	0.000773142
XM_036154203.1	Sall1	-2.25255	581.722	0.552111	-4.07988	4.50581e-05	0.000773126
Gm5191	Gm5191	1.12142	68.2126	0.274777	4.08121	4.48025e-05	0.000769605
NM_022325.5	Ctsz	0.860309	2573.76	0.210656	4.08395	4.42775e-05	0.000761443
NM_009673.2	Anxa5	1.23312	1376.17	0.301178	4.09433	4.23387e-05	0.000728922
NM_031166.3	Id4	-1.24252	475.887	0.303421	-4.09504	4.22099e-05	0.000727524
Rpl10-ps3	Rpl10-ps3	0.490979	2224.63	0.119876	4.09573	4.20848e-05	0.000727494
XM_006527282.5	Smarca2	-1.15489	973.674	0.281998	-4.09539	4.21452e-05	0.000727494
NR_037964.1	2610507I01Rik	-1.21615	82.073	0.296963	-4.09531	4.21605e-05	0.000727494
XM_006526141.5	Osbpl1a	-0.634462	944.578	0.154857	-4.09708	4.18403e-05	0.000724425
NR_030711.1	Mir22hg	1.86982	201.526	0.456134	4.09928	4.1444e-05	0.000718379
NM_008944.2	Psma2	0.889178	1607.38	0.216765	4.10204	4.09523e-05	0.000710662
Rpl15-ps6	Rpl15-ps6	0.656882	273.646	0.16003	4.10474	4.04763e-05	0.0007032
NM_001376368.1	Tjp2	0.784708	519.056	0.191109	4.10607	4.02441e-05	0.000699964
NM_026672.3	Gstm7	-1.72246	213.512	0.419416	-4.10682	4.01142e-05	0.0006985
NM_007748.5	Cox6a1	0.402683	3038.24	0.0979553	4.11088	3.9415e-05	0.000687108
NM_026931.3	Tcim	0.919737	102.292	0.223668	4.11207	3.92136e-05	0.000684378
NM_009942.2	Cox5b	0.629084	1228.89	0.152955	4.11287	3.90778e-05	0.000682789
NM_001204973.1	Brd2	0.666738	2495.43	0.16206	4.11414	3.88632e-05	0.000679816
XR_877675.4	Fbxw4	-1.20064	289.458	0.291745	-4.11537	3.86556e-05	0.000676961
NM_016669.2	Crym	0.598682	148.799	0.145438	4.11641	3.84826e-05	0.000674704
NM_172588.2	Serinc5	-1.03655	267.265	0.251757	-4.11724	3.83435e-05	0.000673039
NM_030244.3	Ier5l	1.24787	168.672	0.303051	4.11771	3.82664e-05	0.000672458
XM_036157168.1	Egln3	1.57016	39.7804	0.381091	4.12018	3.78574e-05	0.000666037
NM_012021.3	Prdx5	0.673769	1394.43	0.163497	4.12099	3.77256e-05	0.000664925
NM_008214.4	Hars	0.585317	255.819	0.142021	4.12135	3.76655e-05	0.000664925
NM_133687.3	Cxxc5	-0.671689	684.987	0.162998	-4.12083	3.77507e-05	0.000664925
NR_102731.1	Stk16	-0.561295	148.442	0.136158	-4.12237	3.74991e-05	0.000662788
NM_172260.3	Cep68	-1.61689	121.196	0.392217	-4.12244	3.74884e-05	0.000662788
NM_177909.5	Slc9a9	-1.13014	278.108	0.274061	-4.12368	3.72873e-05	0.000660573
XR_879501.4	Jmjd6	1.73567	311.573	0.420276	4.12984	3.63015e-05	0.000643857
Gm13611	Gm13611	0.582623	439.572	0.141065	4.13016	3.62507e-05	0.000643703
NM_026533.3	Rps13	0.628335	270.209	0.152098	4.13112	3.60999e-05	0.000641772
XM_006513721.1	Agpat3	-0.616063	269.448	0.149109	-4.13162	3.60209e-05	0.000641113
NR_166500.1	Ccl19-ps1	1.45619	16.584	0.352321	4.13313	3.57859e-05	0.000637673
NM_019776.2	Snd1	4.84252	130.834	1.17149	4.13363	3.57085e-05	0.000637039
NM_172625.2	Ino80c	1.11945	462.635	0.270745	4.13472	3.55392e-05	0.00063476
XM_030249039.1	Psmd2	0.465417	1630.25	0.112519	4.13636	3.52864e-05	0.000630982
Gm16378	Gm16378	0.897723	267.611	0.216851	4.13981	3.47593e-05	0.000622286
NM_001162977.1	Megf6	-3.37425	15.2803	0.814918	-4.1406	3.46398e-05	0.000620874
NM_009656.4	Aldh2	-0.819856	779.292	0.197982	-4.14107	3.45683e-05	0.00062032
NM_172395.3	Cdc42se1	0.992826	290.476	0.239548	4.14458	3.40432e-05	0.000611616
NM_001001295.2	Dis3l	-0.819213	76.7244	0.197541	-4.14706	3.36772e-05	0.00060585
XM_006506649.4	Slc25a18	-1.33559	61.1783	0.32206	-4.14702	3.36826e-05	0.00060585
NM_001285423.1	Esd	0.940546	726.472	0.226627	4.15019	3.322e-05	0.000599169
XM_036157865.1	Kif13a	-0.801725	184.004	0.193182	-4.1501	3.32327e-05	0.000599169
NM_010817.2	Psmd7	0.406184	1360.73	0.0978483	4.15116	3.30798e-05	0.000597824
NM_011076.3	Abcb1a	-1.45339	2483.46	0.350103	-4.15132	3.3057e-05	0.000597824
XM_006514761.5	Ramp3	4.85551	450.516	1.16914	4.15307	3.28046e-05	0.000596171
XM_006511999.5	Snrk	0.84745	1328.09	0.204078	4.15257	3.28764e-05	0.000596171
NM_016752.3	Slc35b1	0.80928	819.303	0.194875	4.15282	3.28408e-05	0.000596171
NM_001364691.1	Ndufa12	0.524065	699.015	0.12621	4.15233	3.29102e-05	0.000596171
Gm8779	Gm8779	1.06956	46.101	0.257378	4.15561	3.24425e-05	0.0005905
Gm6995	Gm6995	0.927284	43.513	0.222964	4.15889	3.19801e-05	0.000582778
XM_017322126.2	Nr1h2	0.672186	406.11	0.161613	4.15922	3.19333e-05	0.00058262
NM_010218.2	Fjx1	-0.965728	75.3668	0.232133	-4.16024	3.17919e-05	0.000580735
NM_001363187.1	Abcc3	-1.47788	84.8629	0.355183	-4.16089	3.17003e-05	0.000579755
NM_001177601.1	0610010K14Rik	1.88216	231.82	0.452227	4.16197	3.15519e-05	0.000577733
XM_036154427.1	Gm10015	1.4675	47.2877	0.352537	4.16269	3.14516e-05	0.000576587
NM_011508.2	Eif1	1.35979	4343.42	0.326504	4.1647	3.11763e-05	0.000572228
Rps2-ps10	Rps2-ps10	0.873495	144.344	0.209587	4.16769	3.07707e-05	0.000565463
NM_009777.3	C1qb	0.939938	11939.1	0.22527	4.17249	3.01287e-05	0.000554331
NM_007687.5	Cfl1	1.04412	4126.34	0.250004	4.17639	2.96166e-05	0.000545944
NM_028763.3	Cbx6	-0.973553	2439.85	0.233117	-4.17624	2.96371e-05	0.000545944
XR_003954404.2	Tdrkh	-1.06614	42.6257	0.25526	-4.17669	2.95779e-05	0.000545944
NM_025272.2	Atp6v0e	0.710832	1349.97	0.17011	4.17865	2.93242e-05	0.000542143
NM_080557.2	Snx4	0.774784	317.841	0.185163	4.18433	2.86011e-05	0.000529414
NM_172678.4	Acad9	-0.906896	90.604	0.216678	-4.18545	2.84599e-05	0.000527441
NM_009409.2	Top2b	-0.61605	721.526	0.147071	-4.1888	2.8043e-05	0.000520346
NM_146205.2	Armc5	0.72033	223.432	0.17193	4.18966	2.79369e-05	0.000519007
NM_031249.2	Cstf2t	-0.430741	361.02	0.102803	-4.18996	2.79001e-05	0.000518956
NM_001113362.1	Tbc1d14	-0.816513	342.37	0.194845	-4.19058	2.78248e-05	0.000518185
XM_030255115.1	Anxa4	0.858379	197.094	0.204787	4.19157	2.77028e-05	0.000516545
NM_013812.2	Cdk2ap1	-0.501189	503.729	0.11955	-4.1923	2.76136e-05	0.00051551
Gm10288	Gm10288	0.632627	581.266	0.150803	4.19506	2.72794e-05	0.000509895
NM_009760.4	Bnip3	0.831734	727.96	0.198211	4.1962	2.71431e-05	0.000507968
Gm10123	Gm10123	0.683339	2222.3	0.162796	4.19751	2.69868e-05	0.000505663
NM_008714.3	Notch1	0.498765	586.519	0.118775	4.19924	2.67806e-05	0.000502417
Gm13552	Gm13552	0.696965	171.183	0.165875	4.20174	2.64866e-05	0.000497511
NM_178005.4	Lrrtm2	-0.922379	102.165	0.219459	-4.20297	2.63437e-05	0.000495437
XM_011238797.4	Ifi207	3.54373	116.506	0.842803	4.2047	2.61434e-05	0.000492276
Ppp1r2-ps2	Ppp1r2-ps2	0.971888	143.007	0.231031	4.20674	2.59085e-05	0.000488454
XR_004939171.1	Cd200	1.90249	902.062	0.451328	4.21533	2.49418e-05	0.000470811
Pcna-ps2	Pcna-ps2	0.72252	222.628	0.171377	4.21596	2.48714e-05	0.000470063
Gm4735	Gm4735	0.723242	600.319	0.17149	4.21739	2.47141e-05	0.00046767
NM_001145034.1	Gm13889	0.684303	258.154	0.162249	4.2176	2.46912e-05	0.00046767
NM_001320725.1	Gm45935	1.79962	25.5126	0.426298	4.2215	2.42684e-05	0.00046066
NM_001310595.1	Psma3	0.789831	404.573	0.187104	4.22136	2.42834e-05	0.00046066
XM_006513234.5	Gna15	-1.61071	161.584	0.381508	-4.22197	2.4218e-05	0.000460564
NM_001139519.1	Zbp1	5.0613	220.678	1.19753	4.22646	2.37398e-05	0.000452033
NM_009742.3	Bcl2a1a	1.26911	152.914	0.300211	4.22741	2.364e-05	0.000450694
Gm11263	Gm11263	0.714347	651.725	0.168967	4.22773	2.36064e-05	0.000450616
NM_026623.3	Nudt21	0.652087	141.689	0.154139	4.23051	2.33163e-05	0.000445635
NM_001330555.1	Tra2b	2.85218	232.743	0.673942	4.23209	2.31534e-05	0.000443077
Gm10313	Gm10313	1.84726	33.3001	0.436033	4.23652	2.2701e-05	0.000434964
NM_024266.3	Rps25	0.490899	1784.26	0.11584	4.23774	2.2578e-05	0.000433151
NM_001305157.1	Pecam1	0.688277	3124.01	0.162374	4.23884	2.24675e-05	0.000431574
XM_006538412.4	Gm12407	1.50812	16.2031	0.355658	4.24037	2.23155e-05	0.000429194
NM_172719.2	Gcn1	-0.892125	218.746	0.210362	-4.2409	2.22623e-05	0.000428711
NM_172503.3	Zswim4	0.791272	76.6308	0.186507	4.24258	2.20969e-05	0.000426064
NM_016900.4	Cav2	-1.04651	399.03	0.246521	-4.2451	2.18492e-05	0.00042182
NM_029537.2	Tmem98	-1.84115	129.122	0.433567	-4.24652	2.17121e-05	0.000419703
NM_007999.6	Fen1	1.80703	128.154	0.425393	4.24791	2.15771e-05	0.000418484
XM_006497854.2	Vav2	-1.43889	168.693	0.338766	-4.24745	2.16217e-05	0.000418484
NM_001168652.1	Lrch4	-3.59412	120.064	0.846164	-4.24755	2.16123e-05	0.000418484
NM_207634.2	Rps24	0.796854	1070.19	0.187501	4.24988	2.13888e-05	0.000415557
NM_001294324.1	Mpv17	-0.821925	277.23	0.193358	-4.25079	2.13018e-05	0.000414394
NM_007481.3	Arf6	0.431751	1799.78	0.101475	4.25476	2.09271e-05	0.000407625
NM_030150.2	Dhx58	1.43014	91.5702	0.335879	4.2579	2.06353e-05	0.000402454
NM_001355053.1	Bcl2l1	1.1383	1513.8	0.267325	4.25813	2.06143e-05	0.000402454
NM_001081383.2	Kmt2c	-1.15998	310.808	0.272107	-4.26297	2.01732e-05	0.000394449
NM_019667.2	Stam2	-1.72493	106.223	0.404424	-4.26516	1.99756e-05	0.000391086
Gm7324	Gm7324	0.703082	99.3778	0.164821	4.26573	1.99251e-05	0.000390599
NM_030259.1	Rilpl2	0.896757	160.345	0.210206	4.26608	1.98933e-05	0.000390476
NR_166210.1	Gm30789	-2.85749	29.3014	0.669267	-4.26958	1.95844e-05	0.000384909
NM_009096.3	Rps6	0.598366	806.045	0.140122	4.27033	1.95185e-05	0.000384106
NM_009439.1	Psmd3	1.02972	1511.46	0.241022	4.27232	1.93453e-05	0.00038119
NM_022883.3	Lpin3	4.04221	43.3102	0.944589	4.27933	1.8746e-05	0.000370332
NM_001355598.1	Lpin1	-1.00869	125.264	0.235729	-4.27904	1.877e-05	0.000370332
Gm6542	Gm6542	0.76251	290.947	0.178131	4.28061	1.86383e-05	0.000368686
NR_015580.2	Sox2ot	-1.4281	69.5341	0.333619	-4.28064	1.86359e-05	0.000368686
NM_133819.3	Ppp1r15b	0.593698	697.158	0.138384	4.29023	1.78486e-05	0.000353983
NM_008614.3	Mobp	1.24517	651.205	0.290176	4.2911	1.77789e-05	0.000353361
NM_007925.4	Eln	-2.16392	245.148	0.504302	-4.29091	1.77942e-05	0.000353361
XM_006512589.5	Pcmt1	1.36622	210.732	0.318153	4.29422	1.75308e-05	0.000349039
XM_030251973.1	Cdca7	-1.75005	57.2346	0.407329	-4.29642	1.73582e-05	0.000346053
NM_019575.4	Scamp4	0.426209	412.681	0.099181	4.29729	1.72902e-05	0.000345149
NM_001198955.1	Gm7694	-1.82095	29.2834	0.423612	-4.29862	1.71867e-05	0.000343532
Eif1-ps1	Eif1-ps1	0.683222	190.551	0.15874	4.30402	1.67723e-05	0.000335687
XR_875429.3	Gm41348	2.35218	84.454	0.546236	4.30615	1.66118e-05	0.000333297
NM_001039081.2	Mier1	-1.19701	490.78	0.277993	-4.3059	1.6631e-05	0.000333297
NM_009148.4	Exoc4	-0.585415	498.394	0.135925	-4.3069	1.65555e-05	0.000332658
XM_017317293.2	Notch3	-3.03999	21.9763	0.705554	-4.30866	1.64249e-05	0.000330468
XR_373599.5	Psen2	1.02483	155.411	0.237785	4.3099	1.63328e-05	0.000329047
NM_001278256.1	Prnp	-4.95652	215.916	1.14983	-4.31065	1.62776e-05	0.000328369
Gm8623	Gm8623	0.534841	1239.68	0.123757	4.32172	1.54819e-05	0.00031273
NM_011313.2	S100a6	1.89991	426.846	0.439188	4.32595	1.51878e-05	0.000307196
NM_007528.3	Bcl6b	1.69137	100.948	0.390804	4.32793	1.5052e-05	0.000304853
NM_023665.3	Rsrp1	-2.12387	928.322	0.490705	-4.32821	1.50327e-05	0.000304853
XR_001780001.2	Sarm1	-0.923311	178.581	0.213245	-4.32981	1.49235e-05	0.000303055
NM_008143.3	Rack1	0.602118	3204.37	0.139035	4.3307	1.48635e-05	0.000302238
NM_146207.3	Cul4a	-0.649353	173.304	0.149878	-4.33255	1.47393e-05	0.000300111
XM_011239155.2	Brd3	-0.989231	341.469	0.228142	-4.33603	1.45077e-05	0.00029579
XR_004936246.1	Aig1	1.26215	477.965	0.29097	4.33773	1.43961e-05	0.000293908
NM_026305.2	Elob	0.450096	1060.29	0.103751	4.33821	1.43645e-05	0.000293655
XM_006519738.4	Slmap	-0.63817	389.937	0.147087	-4.33872	1.43316e-05	0.000293374
NM_007792.4	Csrp2	-1.78548	496.564	0.411446	-4.33952	1.42791e-05	0.000292693
NM_027872.4	Slc46a3	1.37976	74.1377	0.317736	4.34248	1.40884e-05	0.000289173
Gm2000	Gm2000	0.691205	1764.68	0.15914	4.34336	1.40317e-05	0.000288396
NM_001284332.1	Shisa5	-3.01362	792.521	0.693488	-4.3456	1.38898e-05	0.000285865
NM_011018.3	Sqstm1	1.20486	2681.99	0.277207	4.34642	1.38379e-05	0.00028518
NM_133831.3	Nop53	0.909142	1038.13	0.209151	4.34683	1.3812e-05	0.00028518
NM_011185.3	Psmb1	0.768169	1339.2	0.176732	4.34651	1.38322e-05	0.00028518
NM_019822.3	Adrm1	0.600463	337.022	0.138136	4.3469	1.38074e-05	0.00028518
XM_011245221.3	Zmym2	-0.995862	204.644	0.229107	-4.3467	1.382e-05	0.00028518
Gm13651	Gm13651	-1.33948	73.8316	0.308037	-4.34844	1.37107e-05	0.000284478
NM_010479.2	Hspa1a	2.4019	314.723	0.552272	4.34913	1.3668e-05	0.000283978
NM_021310.3	Jmy	-0.683065	451.098	0.156998	-4.3508	1.35643e-05	0.000282208
XM_006510329.4	Layn	-1.80771	153.678	0.415438	-4.35134	1.3531e-05	0.000281899
NM_172778.2	Maob	-1.21223	133.184	0.278568	-4.35166	1.35108e-05	0.000281862
Gm10705	Gm10705	1.52555	119.452	0.3505	4.3525	1.34597e-05	0.00028118
NM_172396.3	Smim7	0.536107	643.898	0.123137	4.35375	1.33826e-05	0.000280154
XM_036157503.1	Itgb8	-0.97631	76.8892	0.224254	-4.3536	1.33922e-05	0.000280154
Gm8226	Gm8226	0.75295	136.996	0.172916	4.35443	1.33412e-05	0.000279854
NM_011874.2	Psmc4	0.802719	515.175	0.184326	4.35488	1.33142e-05	0.000279671
NM_023386.5	Rtp4	1.46368	60.3443	0.336013	4.35602	1.32448e-05	0.000278597
NM_178757.4	Irf2bp1	-0.427989	381.982	0.0982186	-4.35752	1.31547e-05	0.000277083
NM_173379.3	P3h2	-1.47692	162.606	0.338606	-4.36176	1.2902e-05	0.000272136
Gm16477	Gm16477	0.78006	117.464	0.178761	4.36369	1.27884e-05	0.000270113
Gm8910	Gm8910	0.791933	840.155	0.181446	4.36457	1.27371e-05	0.000269403
NM_029023.3	Scpep1	1.13951	649.023	0.260923	4.36722	1.25839e-05	0.000266603
NR_004442.1	Gm15421	0.652865	562.774	0.149494	4.36716	1.25873e-05	0.000266603
NM_175116.4	Lpar6	-1.22255	341.715	0.279778	-4.36974	1.24397e-05	0.00026421
NM_001113248.2	Sin3b	1.10429	619.046	0.252627	4.37124	1.23545e-05	0.000262766
XM_030245255.2	Sash1	1.60376	1034	0.366584	4.37489	1.21491e-05	0.000258758
NM_001160214.1	Ppp4r3a	-5.99188	93.5078	1.36857	-4.37821	1.19659e-05	0.000255212
NM_001310598.1	Fam126b	-0.669902	361.46	0.152986	-4.37886	1.19304e-05	0.000254809
XM_006525926.4	F830016B08Rik	3.89383	34.2169	0.88895	4.38026	1.18536e-05	0.000253525
Gm9797	Gm9797	0.750083	67.0312	0.171186	4.38169	1.1776e-05	0.000252218
NM_001378797.1	Marchf5	0.458355	425.61	0.104537	4.38464	1.16179e-05	0.000249181
NM_010074.3	Dpp4	-2.13221	43.1019	0.486245	-4.38505	1.15957e-05	0.000249054
NM_144797.3	Metrnl	1.3194	86.386	0.30082	4.38602	1.15443e-05	0.0002483
NM_029321.2	Ttc32	-2.00384	55.1663	0.456004	-4.39435	1.11102e-05	0.000239301
NM_019771.2	Dstn	0.596834	3148.83	0.135749	4.39662	1.09951e-05	0.000237425
Rpl19-ps1	Rpl19-ps1	0.595357	335.16	0.13542	4.39637	1.10076e-05	0.000237425
NM_011078.3	Phf2	-0.534307	450.654	0.121531	-4.39646	1.10028e-05	0.000237425
XR_004691359.2	Gm2564	1.60797	17.8411	0.365608	4.39809	1.09209e-05	0.000236558
XM_030253284.1	Lrp8	-1.39413	188.863	0.31664	-4.40289	1.0682e-05	0.000231712
XM_006499907.5	Slc23a2	1.05946	374.402	0.240437	4.40638	1.05112e-05	0.000228331
NM_025592.3	Rpl35	0.670166	1035.11	0.151929	4.41106	1.02865e-05	0.000223768
NM_007569.2	Btg1	1.10823	891.269	0.251165	4.41236	1.02252e-05	0.000222752
XM_030242209.2	Furin	0.967985	618.898	0.219187	4.41626	1.00425e-05	0.000219085
NR_030738.1	2410006H16Rik	1.32464	629.224	0.299876	4.4173	9.99421e-06	0.000218564
NM_133676.2	Osgep	-1.12715	192.166	0.255181	-4.41708	1.00043e-05	0.000218564
XM_006527909.5	Prkx	0.786161	323.782	0.17794	4.41812	9.95635e-06	0.00021814
Rpl7a-ps11	Rpl7a-ps11	0.758939	136.945	0.171614	4.42237	9.76236e-06	0.000214197
XM_011243373.1	Gstt2	-0.661571	81.7987	0.149575	-4.42301	9.73332e-06	0.000213867
Gm11575	Gm11575	1.14096	57.5369	0.257487	4.43115	9.37298e-06	0.000206246
XM_017321917.1	Unc45a	0.813025	97.8896	0.183475	4.43125	9.369e-06	0.000206246
NM_146078.3	Ubr2	-1.10794	310.204	0.24999	-4.43194	9.33908e-06	0.000206094
XM_036155570.1	Cd63	1.4737	1769.63	0.332049	4.43819	9.07166e-06	0.000200644
XM_017319352.3	Ehd4	1.09562	1233.5	0.246871	4.43802	9.07899e-06	0.000200644
NM_009943.2	Cox6a2	1.51786	74.1379	0.341726	4.44173	8.92369e-06	0.000197805
NM_133859.2	Olfml3	-1.17935	1121.43	0.265516	-4.44171	8.92459e-06	0.000197805
NM_013640.3	Psmb10	1.34586	954.205	0.302912	4.44308	8.86794e-06	0.000197121
NM_009739.3	Bckdk	-0.678521	218.114	0.152643	-4.44516	8.78257e-06	0.000195508
Gm5302	Gm5302	0.808106	196.653	0.181755	4.44614	8.74286e-06	0.000194908
XM_006538192.4	Hacd4	-2.29673	82.4001	0.516532	-4.44645	8.73027e-06	0.000194908
NM_013686.4	Tcp1	0.553973	598.896	0.124578	4.4468	8.71592e-06	0.000194877
NM_001081415.2	Samd1	-0.54466	215.436	0.12238	-4.45057	8.56435e-06	0.000191769
NM_001081256.1	Kdm3b	-1.1898	95.3634	0.267264	-4.45177	8.51661e-06	0.00019098
Rpl7a-ps10	Rpl7a-ps10	0.76852	300.95	0.172355	4.45894	8.23649e-06	0.00018497
NM_007382.5	Acadm	-0.863557	305.353	0.193564	-4.46136	8.14401e-06	0.000183162
NM_001356960.1	Tmem128	3.84851	144.236	0.861246	4.46854	7.87563e-06	0.000177388
XM_011249924.4	Ankrd6	-0.967912	96.9801	0.216498	-4.47076	7.79408e-06	0.00017581
NM_008131.4	Glul	-0.45578	13414.9	0.101864	-4.47439	7.66284e-06	0.000173105
NM_199015.4	Phf11d	1.30568	173.764	0.291623	4.47729	7.55953e-06	0.000171024
Gm13436	Gm13436	0.533602	664.43	0.119085	4.48084	7.43492e-06	0.000168455
Gm10177	Gm10177	0.737919	784.898	0.164628	4.48235	7.38261e-06	0.000167518
NM_008503.5	Rps2	0.896966	788.307	0.199918	4.48666	7.23469e-06	0.000164406
XM_006505722.3	Ogg1	-4.67108	394.246	1.04077	-4.48809	7.18647e-06	0.000163554
NM_007743.3	Col1a2	-1.72716	98.8747	0.384635	-4.49039	7.10924e-06	0.000162038
NM_013632.4	Pnp	0.478816	1171.63	0.106571	4.49292	7.02534e-06	0.000160365
Gm7676	Gm7676	1.73899	73.4074	0.386896	4.49473	6.96589e-06	0.000159266
Gm8349	Gm8349	1.43242	28.9998	0.31869	4.4947	6.96677e-06	0.000159266
Gm8566	Gm8566	0.712069	259.794	0.158351	4.49678	6.89893e-06	0.000158189
Gm5566	Gm5566	0.877464	484.947	0.195109	4.4973	6.88227e-06	0.000158044
NM_008102.4	Gch1	0.747779	391.433	0.165959	4.50581	6.61215e-06	0.000152069
NM_008536.4	Tm4sf1	1.30294	308.39	0.288599	4.51472	6.34006e-06	0.000146447
XR_004938390.1	Tdrd3	-0.90851	58.1505	0.201253	-4.51427	6.35358e-06	0.000146447
XM_006498860.4	Mertk	-6.40751	537.145	1.41944	-4.51412	6.35808e-06	0.000146447
NM_008580.4	Map3k5	-0.919729	196.786	0.203656	-4.51608	6.2995e-06	0.000145757
NR_027831.1	2810002D19Rik	-1.9093	22.6264	0.421712	-4.5275	5.96862e-06	0.000138311
Gm8797	Gm8797	0.923386	2648.2	0.203922	4.52813	5.95071e-06	0.000138105
XM_011240521.2	Ago1	-1.3063	355.884	0.288302	-4.53102	5.86998e-06	0.000136439
Gm5561	Gm5561	0.670492	164.511	0.147937	4.53229	5.83485e-06	0.000135829
NM_011512.3	Surf4	1.03095	998.021	0.227391	4.53384	5.7922e-06	0.000135042
NM_008583.2	Men1	-3.9369	124.539	0.867999	-4.5356	5.74399e-06	0.000134123
NM_172429.3	Smndc1	1.74265	232.515	0.384063	4.53739	5.69535e-06	0.000133191
NM_025636.5	Ntpcr	-4.38973	160.016	0.967242	-4.5384	5.66819e-06	0.000132759
XM_030249066.2	Fgd4	-1.49632	83.5925	0.329526	-4.54083	5.60345e-06	0.000131444
NM_175750.3	Plxna4	-0.799152	298.066	0.1758	-4.5458	5.47259e-06	0.000128572
NM_009156.2	Selenow	0.490274	544.85	0.10784	4.5463	5.4596e-06	0.000128465
NM_009199.3	Slc1a1	0.911157	851.37	0.200294	4.54909	5.38785e-06	0.000126972
NM_001271603.1	Socs1	3.18357	85.2907	0.696571	4.57034	4.86923e-06	0.000114927
XM_036153427.1	Zfp715	-1.07471	173.554	0.234711	-4.57884	4.67569e-06	0.000110575
XR_878851.3	Mbtps1	-1.08973	473.64	0.237997	-4.57875	4.67759e-06	0.000110575
NM_008803.3	Pde8a	-0.988391	171.965	0.215767	-4.58082	4.63167e-06	0.00010983
NM_001360921.1	Hars2	-0.930085	81.3139	0.202997	-4.58177	4.61053e-06	0.000109498
XM_006506398.5	Hpgds	-1.64009	270.846	0.357919	-4.58228	4.59931e-06	0.000109402
XM_036164050.1	Zfp362	-0.806285	241.371	0.175932	-4.58293	4.58503e-06	0.000109232
NM_201369.3	N4bp2l2	-0.657784	353.47	0.14343	-4.5861	4.51597e-06	0.000107755
Gm6286	Gm6286	0.754635	327.03	0.164524	4.58679	4.5012e-06	0.000107571
XR_872469.4	5033421B08Rik	2.63944	19.5267	0.574963	4.59063	4.41905e-06	0.000105773
XM_011245208.4	Ccser2	-0.63595	466.371	0.138487	-4.59211	4.38777e-06	0.000105189
NR_002875.3	Ubb-ps	0.897829	2900.22	0.195173	4.60017	4.22142e-06	0.00010136
XR_003955646.2	Tpcn1	-1.34977	322.967	0.293287	-4.60222	4.1802e-06	0.000100529
NM_007470.4	Apod	1.89516	107.017	0.411584	4.60456	4.13345e-06	9.95613e-05
NM_001001186.3	Zfp456	-2.76814	14.1998	0.600628	-4.60874	4.05114e-06	9.77329e-05
NM_010591.2	Jun	1.53874	1643.18	0.333414	4.61509	3.92917e-06	9.509e-05
Gm13588	Gm13588	1.06848	124.376	0.231536	4.61477	3.93536e-06	9.509e-05
XM_006495871.4	Tns1	0.862755	1335.57	0.186744	4.61998	3.83777e-06	9.30263e-05
NM_008235.2	Hes1	1.845	701.594	0.39932	4.62035	3.83096e-06	9.3009e-05
NR_166687.1	Gm9917	0.777381	298.168	0.168233	4.62086	3.8215e-06	9.29271e-05
XM_006518736.4	Sorbs3	0.885265	184.319	0.191487	4.62312	3.78018e-06	9.20689e-05
XM_036152547.1	Gm33989	-1.53327	63.2541	0.331313	-4.62785	3.69477e-06	9.01324e-05
NM_001081051.2	D130043K22Rik	-1.46676	43.285	0.316834	-4.62944	3.66656e-06	8.95872e-05
XR_004935060.1	LOC102636360	1.5325	46.5123	0.330999	4.62993	3.65789e-06	8.95188e-05
Gm14494	Gm14494	0.746237	302.331	0.161118	4.63162	3.62819e-06	8.90233e-05
XM_006506056.4	Gmcl1	-1.31771	147.394	0.284517	-4.63141	3.63182e-06	8.90233e-05
NM_010493.3	Icam1	1.62077	775.36	0.349899	4.6321	3.61971e-06	8.90123e-05
NM_021336.4	Snrpa1	0.766482	180.629	0.165284	4.63736	3.52893e-06	8.69198e-05
NM_177715.4	Kctd12	-1.15196	2658.4	0.248165	-4.64192	3.45179e-06	8.51572e-05
XM_011250460.4	Relb	1.04294	132.779	0.224605	4.64346	3.42619e-06	8.46625e-05
NM_011337.2	Ccl3	4.1591	232.447	0.894308	4.65064	3.30911e-06	8.19017e-05
XM_006505103.5	Fam3c	-0.576226	387.188	0.123851	-4.65259	3.27794e-06	8.13916e-05
XR_004940133.1	Zfp341	-1.26135	31.1217	0.271127	-4.65226	3.28316e-06	8.13916e-05
NM_001360536.1	Ocln	-2.08762	244.126	0.448268	-4.65708	3.20721e-06	7.97676e-05
NR_138563.1	Zfas1	1.26908	354.262	0.272398	4.6589	3.17901e-06	7.91952e-05
NM_025980.2	Nrarp	1.19544	270.878	0.256482	4.66091	3.14819e-06	7.85556e-05
NM_008129.4	Gclm	-0.560125	277.411	0.120013	-4.66722	3.05308e-06	7.63071e-05
Rpl15-ps3	Rpl15-ps3	0.668909	959.151	0.143258	4.66925	3.02297e-06	7.56783e-05
NM_010835.2	Msx1	-1.17158	112.45	0.250897	-4.66956	3.0184e-06	7.56783e-05
NM_178407.3	Arap2	-0.975634	471.181	0.208905	-4.67023	3.00866e-06	7.5568e-05
NM_025974.2	Rpl14	0.561004	1429.55	0.120089	4.67156	2.98914e-06	7.52012e-05
Gm6170	Gm6170	0.692716	495.636	0.148116	4.67685	2.91318e-06	7.34111e-05
Gm14143	Gm14143	1.78428	20.7586	0.380705	4.68677	2.77551e-06	7.00574e-05
XR_003946387.2	Man2a2	-0.993843	245.226	0.211851	-4.69125	2.71547e-06	6.86556e-05
NM_010917.2	Nid1	1.53796	190.878	0.327593	4.69473	2.66961e-06	6.76651e-05
XM_030242942.2	Rgs10	-3.60716	31.9897	0.768372	-4.69456	2.67187e-06	6.76651e-05
NM_001291069.1	Golim4	-1.59665	195.647	0.339625	-4.70121	2.58625e-06	6.57149e-05
NM_026042.3	Med29	0.916994	92.8177	0.194964	4.70341	2.55849e-06	6.51178e-05
XM_006522347.3	Carhsp1	1.18138	400.548	0.251068	4.70543	2.53334e-06	6.45853e-05
NM_001278581.1	Pomc	-3.27017	65.9096	0.694955	-4.70558	2.53146e-06	6.45853e-05
NR_152192.1	Pde2a	-1.08018	80.0295	0.229198	-4.71288	2.44243e-06	6.24762e-05
Pgam1-ps2	Pgam1-ps2	0.815845	1118.64	0.172946	4.71735	2.38937e-06	6.12216e-05
XR_003953734.2	Ttpal	-0.984846	102.728	0.208726	-4.71837	2.37747e-06	6.10192e-05
NM_029571.2	Kti12	0.921299	142.873	0.195203	4.71969	2.36208e-06	6.07262e-05
NM_001205345.1	Sun2	0.607174	896.388	0.128631	4.72028	2.35525e-06	6.06526e-05
Rpl7a-ps5	Rpl7a-ps5	0.786202	268.468	0.166546	4.72064	2.35107e-06	6.06474e-05
Cox5b-ps	Cox5b-ps	0.6389	602.062	0.135332	4.721	2.34693e-06	6.0643e-05
XM_017321702.3	Tlr5	-2.53311	16.3263	0.536478	-4.72175	2.33825e-06	6.05211e-05
Eif4a-ps4	Eif4a-ps4	0.842265	279.67	0.17836	4.72227	2.33223e-06	6.04677e-05
XR_004934391.1	Gm8995	1.39638	437.094	0.295636	4.7233	2.3205e-06	6.02659e-05
NM_133763.1	Dnttip1	0.675117	168.413	0.142828	4.72677	2.2812e-06	5.93462e-05
XM_006530746.5	Smad1	1.80827	267.617	0.381853	4.73551	2.18503e-06	5.69599e-05
NM_018822.3	Sgsh	-1.71673	41.5118	0.362527	-4.73545	2.18574e-06	5.69599e-05
NM_008491.1	Lcn2	2.25408	864.426	0.475908	4.73638	2.17571e-06	5.68925e-05
NR_033228.1	E030024N20Rik	0.548716	544.59	0.115824	4.73752	2.16351e-06	5.66705e-05
NM_021427.2	Fam181b	-1.28792	112.668	0.271482	-4.74404	2.09495e-06	5.4969e-05
NM_008183.4	Gstm2	-1.46719	79.7492	0.309211	-4.74495	2.08557e-06	5.48172e-05
NM_026369.2	Arpc5	0.523206	1380.15	0.110181	4.7486	2.04831e-06	5.39306e-05
NM_001359945.1	Oasl1	1.50671	91.6792	0.317039	4.75245	2.0097e-06	5.30053e-05
NM_010387.3	H2-DMb1	1.22669	354.687	0.258105	4.75267	2.00753e-06	5.30053e-05
NM_153505.4	Nckap1l	-0.976239	915.343	0.205371	-4.75354	1.99883e-06	5.29013e-05
Gm12537	Gm12537	1.3864	115.979	0.29156	4.7551	1.9835e-06	5.25869e-05
XM_030254310.1	Scarb1	-0.731616	405.443	0.153801	-4.75691	1.9658e-06	5.22083e-05
XM_006521080.5	Samd12	-1.23659	218.392	0.259717	-4.76131	1.92342e-06	5.11718e-05
NM_008907.2	Ppia	0.687758	1217.06	0.144289	4.76655	1.8741e-06	4.99466e-05
NM_173011.2	Idh2	-1.15455	340.919	0.242116	-4.76859	1.8552e-06	4.95292e-05
NM_134054.2	Sptssa	-1.02454	354.024	0.214684	-4.77234	1.821e-06	4.87013e-05
Gm5184	Gm5184	0.814571	101.75	0.170464	4.77855	1.76567e-06	4.73498e-05
NM_021526.2	Psmd14	0.56031	624.977	0.11726	4.77835	1.76736e-06	4.73498e-05
NM_023326.2	Bmyc	-0.821459	192.398	0.171855	-4.77996	1.75331e-06	4.71388e-05
NM_007742.4	Col1a1	-1.9686	58.5065	0.411746	-4.78111	1.74329e-06	4.69521e-05
XR_003955624.2	Galnt11	-1.17736	60.7884	0.246189	-4.78235	1.73254e-06	4.67448e-05
NM_001101433.2	Zcchc24	-0.798978	308.349	0.166935	-4.78615	1.7001e-06	4.59508e-05
Rps13-ps2	Rps13-ps2	0.687788	3836.83	0.143679	4.78697	1.69322e-06	4.5846e-05
NM_153570.2	Noc4l	1.05877	120.207	0.22113	4.78797	1.68477e-06	4.56983e-05
NM_011817.2	Gadd45g	1.67754	323.528	0.349709	4.79696	1.61091e-06	4.37727e-05
Gm11814	Gm11814	1.19674	161.286	0.24918	4.80271	1.56529e-06	4.26241e-05
NM_130863.2	Grk2	-0.880387	640.148	0.183313	-4.80264	1.56585e-06	4.26241e-05
NM_026115.4	Hat1	1.33174	123.36	0.277195	4.80433	1.5527e-06	4.24813e-05
XM_006517605.2	Marveld2	1.15132	122.329	0.239657	4.80403	1.55504e-06	4.24813e-05
NM_023143.3	C1ra	1.60604	75.6942	0.33425	4.80491	1.5482e-06	4.24462e-05
NM_001357213.1	Atp1b3	0.543176	1417.78	0.113009	4.80647	1.53617e-06	4.21923e-05
XM_036155650.1	Lrp1	-0.574416	938.321	0.11943	-4.80964	1.51203e-06	4.16039e-05
NM_023275.2	Rhoj	1.42599	1110.08	0.29632	4.81232	1.4919e-06	4.11241e-05
Gm16332	Gm16332	-1.48928	42.1705	0.309303	-4.81496	1.47232e-06	4.06578e-05
NM_026211.3	Tmed9	0.660285	1659.05	0.137016	4.81903	1.44258e-06	3.99087e-05
NM_023210.4	Anp32e	1.36862	266.671	0.283928	4.82028	1.43354e-06	3.97306e-05
XM_036163924.1	Rps6ka1	-1.13895	706.619	0.235911	-4.82786	1.38006e-06	3.8318e-05
NM_028340.2	Susd3	-2.63861	13.1485	0.546183	-4.831	1.3585e-06	3.7788e-05
NM_010811.2	Ndst2	-0.555057	197.746	0.114761	-4.83662	1.32068e-06	3.68031e-05
NM_173873.1	Clcn3	-1.16685	395.221	0.240465	-4.8525	1.21915e-06	3.40359e-05
NM_001363356.1	Cnot6	-1.31911	276.068	0.27181	-4.85304	1.21583e-06	3.40054e-05
Gm4654	Gm4654	1.41896	48.4747	0.292359	4.85349	1.21304e-06	3.39897e-05
XM_036157039.1	Osbp2	-0.846424	313.89	0.174102	-4.86164	1.16417e-06	3.26801e-05
NM_011779.3	Coro1c	1.38763	1137.12	0.285038	4.86821	1.12612e-06	3.16703e-05
NM_019980.2	Litaf	3.13639	1436.1	0.644098	4.86943	1.1192e-06	3.15558e-05
Gm4828	Gm4828	0.670962	543.86	0.137794	4.86929	1.11998e-06	3.15558e-05
XM_036157136.1	Srp54c	1.12946	50.3736	0.231851	4.8715	1.10753e-06	3.13206e-05
XM_036164719.1	Grm3	-0.9492	93.0044	0.194006	-4.89264	9.94943e-07	2.81888e-05
NM_001033189.3	C77080	2.13311	177.822	0.435311	4.90019	9.5742e-07	2.71761e-05
NM_172806.3	Btbd7	-1.00595	208.845	0.205039	-4.90614	9.28869e-07	2.64148e-05
XM_006495933.5	Slc39a10	-1.82091	915.334	0.371109	-4.90668	9.26319e-07	2.63915e-05
XM_006501324.3	Tmem131l	-1.48198	75.6399	0.301833	-4.90992	9.11142e-07	2.60076e-05
XM_036163305.1	Tmem144	-1.49235	69.4797	0.303868	-4.91119	9.05265e-07	2.58882e-05
NM_010478.2	Hspa1b	2.20977	233.125	0.449646	4.91446	8.90263e-07	2.5507e-05
NM_026545.3	Psmd8	1.38341	1389.13	0.281277	4.91831	8.72961e-07	2.50583e-05
XM_006500216.5	Wdsub1	-0.835592	82.4792	0.169818	-4.92051	8.6321e-07	2.4825e-05
NM_145455.3	Btf3	0.807518	662.85	0.164073	4.92171	8.57893e-07	2.47186e-05
Gm6467	Gm6467	0.9691	239.943	0.196861	4.92277	8.53279e-07	2.46322e-05
NM_008155.4	Gpi1	0.452176	1516.83	0.0918067	4.9253	8.42295e-07	2.43612e-05
NM_009564.2	Zfp64	2.18529	148.892	0.443049	4.93239	8.12306e-07	2.35384e-05
NM_025352.3	Uqcrq	0.901467	2314.42	0.182721	4.93358	8.07358e-07	2.34395e-05
NM_001174155.1	Rasgrp4	-3.72916	12.34	0.755767	-4.93427	8.04496e-07	2.34009e-05
NM_008250.2	Hlx	1.37096	251.815	0.27761	4.93842	7.87598e-07	2.29531e-05
XM_006496675.4	Ifi204	2.96694	276.514	0.600419	4.94145	7.75428e-07	2.26416e-05
NM_009443.3	Tgoln1	0.646058	2099.21	0.13023	4.9609	7.01655e-07	2.05268e-05
Gm5256	Gm5256	0.735748	250.364	0.148081	4.96854	6.7458e-07	1.97852e-05
NM_007393.5	Actb	0.650392	101727	0.130905	4.96842	6.75011e-07	1.97852e-05
XM_006505670.5	Mxd1	0.616576	160.488	0.123618	4.98777	6.108e-07	1.79721e-05
NM_010219.4	Fkbp4	-1.11165	1037.37	0.22286	-4.98811	6.09714e-07	1.79721e-05
NR_030720.1	Gvin-ps5	2.02489	38.8054	0.405678	4.99137	5.99531e-07	1.77088e-05
NM_011971.4	Psmb3	1.05587	1193.68	0.211357	4.99566	5.86353e-07	1.73531e-05
XM_036162212.1	LOC118568469	1.6717	42.5234	0.33449	4.99775	5.80038e-07	1.71995e-05
Gm3695	Gm3695	1.6887	40.0372	0.337859	4.99823	5.78578e-07	1.71896e-05
NM_010833.2	Msn	1.2561	3106.2	0.251098	5.00242	5.66151e-07	1.68532e-05
NM_001364846.1	Prickle1	-1.30416	439.765	0.260458	-5.00721	5.52259e-07	1.64718e-05
NM_025963.4	Rps10	1.2789	1024.97	0.25492	5.01686	5.25238e-07	1.56965e-05
NM_007421.2	Adssl1	1.27677	92.2559	0.254367	5.0194	5.1834e-07	1.55207e-05
NR_027985.1	4632415L05Rik	-1.00854	106.283	0.20076	-5.02364	5.07015e-07	1.52114e-05
NM_024218.4	Rpl24	0.7261	731.869	0.144275	5.03277	4.83442e-07	1.45544e-05
NM_011340.3	Serpinf1	-1.59178	64.5111	0.3163	-5.03249	4.84162e-07	1.45544e-05
NM_146008.2	Tcp11l2	-0.810768	144.581	0.161062	-5.03389	4.8063e-07	1.45053e-05
NM_007609.3	Casp4	2.85122	136.038	0.56627	5.03509	4.77627e-07	1.44433e-05
NM_007901.5	S1pr1	1.41385	4609.8	0.280777	5.03549	4.76631e-07	1.44417e-05
XM_006508661.4	Tnfrsf23	2.28817	77.297	0.453649	5.04391	4.56105e-07	1.38694e-05
Gm7729	Gm7729	1.10304	279.974	0.218702	5.04361	4.56835e-07	1.38694e-05
NM_001378660.1	Gm2102	-3.398	25.9952	0.672674	-5.05149	4.38387e-07	1.33625e-05
Gm4824	Gm4824	0.722134	320.41	0.142887	5.05387	4.32954e-07	1.32233e-05
Gm4950	Gm4950	0.999149	427.063	0.197664	5.05477	4.30907e-07	1.31871e-05
NM_010358.5	Gstm1	-0.780778	1013.28	0.154451	-5.05516	4.30019e-07	1.31864e-05
NM_010380.3	H2-D1	1.77013	11214.9	0.350121	5.05578	4.28641e-07	1.31706e-05
XM_036166207.1	Slco1a4	-2.70868	2153.19	0.535674	-5.05658	4.26831e-07	1.31414e-05
Gm3839	Gm3839	1.35453	26.4337	0.267243	5.06852	4.00925e-07	1.23687e-05
NM_009410.3	Top3a	-1.43513	43.0756	0.282659	-5.07727	3.829e-07	1.18366e-05
XR_004942433.1	Clock	-0.854195	91.482	0.167963	-5.08562	3.66425e-07	1.13502e-05
Rpl19-ps11	Rpl19-ps11	0.603142	1507.61	0.118401	5.09407	3.50465e-07	1.08779e-05
NR_046286.1	H2-T10	1.57114	59.5418	0.30839	5.09465	3.49391e-07	1.08667e-05
NM_010338.2	Gpr37	-0.966377	133.424	0.189616	-5.09649	3.46007e-07	1.07834e-05
Gm10108	Gm10108	0.692466	291.529	0.135791	5.09951	3.40525e-07	1.06343e-05
NM_001358767.1	Cct2	0.58115	978.175	0.113846	5.10472	3.31286e-07	1.0367e-05
XM_006539129.4	Tprgl	-0.589029	1544.42	0.11536	-5.10603	3.28998e-07	1.03165e-05
NR_003364.1	BC018473	3.31903	248.705	0.64879	5.11573	3.12535e-07	9.8204e-06
NM_145445.4	Eif2b2	1.43535	653.146	0.279764	5.13057	2.8886e-07	9.10999e-06
NM_016905.2	Galk1	1.07556	151.468	0.20965	5.13027	2.89329e-07	9.10999e-06
XM_030244696.2	Slc38a3	-1.95275	466.297	0.380084	-5.13768	2.78153e-07	8.79437e-06
XR_004934144.1	Nucb2	1.36864	241.385	0.266321	5.13905	2.76129e-07	8.74849e-06
XM_006502687.4	Lsm10	-0.782456	202.731	0.152176	-5.14178	2.72143e-07	8.64012e-06
Gm2148	Gm2148	0.782014	212.679	0.152	5.14484	2.67743e-07	8.51813e-06
Gm8741	Gm8741	1.12766	144.901	0.218987	5.14946	2.6124e-07	8.32859e-06
NM_015754.2	Rbbp9	-1.21924	157.776	0.236526	-5.15478	2.53933e-07	8.11258e-06
NM_009906.6	Tpp1	-0.692878	1768.09	0.134313	-5.1587	2.48675e-07	7.96125e-06
XM_006523348.5	Agpat4	-3.64238	123.757	0.704542	-5.16985	2.34278e-07	7.51609e-06
NM_178872.4	Trim36	-1.35696	63.6929	0.262372	-5.17189	2.31734e-07	7.45012e-06
NM_001177753.1	Pfkfb3	5.11124	271.638	0.987457	5.17616	2.26494e-07	7.29701e-06
XM_006495592.4	Crispld1	-2.14804	37.2082	0.414882	-5.17748	2.24906e-07	7.2612e-06
NM_001039554.3	Angptl7	-2.10178	137.603	0.404638	-5.19423	2.05572e-07	6.65105e-06
NM_153566.2	Yrdc	1.67832	251.795	0.322995	5.19612	2.03488e-07	6.5976e-06
Gm13292	Gm13292	1.39222	27.2678	0.267614	5.20236	1.96775e-07	6.39351e-06
NM_001025373.2	Zfp943	-1.20419	80.3954	0.231393	-5.20409	1.94947e-07	6.34764e-06
XM_036161572.1	Afap1l2	-2.72702	148.669	0.523906	-5.20518	1.93808e-07	6.32402e-06
XM_036155012.1	Snx14	-1.31668	89.309	0.252755	-5.20931	1.89542e-07	6.19806e-06
XM_030246442.2	Ndel1	0.631838	755.133	0.121123	5.2165	1.82334e-07	5.98776e-06
NM_175366.3	Mex3b	-1.71114	57.5256	0.328049	-5.21611	1.82719e-07	5.98776e-06
NM_001013365.2	Osm	2.67854	66.4884	0.513268	5.21859	1.80286e-07	5.93621e-06
NM_009547.3	Zbtb14	-0.991418	84.4389	0.189981	-5.21851	1.80368e-07	5.93621e-06
Gm6789	Gm6789	0.72671	1498.04	0.139101	5.22432	1.74792e-07	5.78892e-06
NM_001033344.3	Dusp27	-1.90683	29.6882	0.365016	-5.22396	1.75135e-07	5.78892e-06
Pgam1-ps1	Pgam1-ps1	0.756521	710.099	0.144722	5.2274	1.71906e-07	5.70691e-06
NM_016876.3	Eif3g	0.632042	767.394	0.1209	5.22781	1.71531e-07	5.70688e-06
NM_013706.2	Cd52	1.00977	1128.65	0.193105	5.22914	1.70304e-07	5.67841e-06
NM_007763.3	Crip1	0.775373	774.045	0.148078	5.23624	1.63883e-07	5.48342e-06
XM_030248512.2	Fmnl3	-0.626175	559.032	0.11959	-5.236	1.64097e-07	5.48342e-06
LOC673652	LOC673652	1.78401	62.6931	0.340477	5.23974	1.60802e-07	5.39695e-06
NM_011803.2	Klf6	2.17797	4245.91	0.415467	5.24223	1.5865e-07	5.33644e-06
NM_010865.3	Myoc	-7.44681	16.3243	1.42053	-5.24228	1.58601e-07	5.33644e-06
NM_001081750.1	Zfp664	-0.931231	564.822	0.177438	-5.2482	1.53592e-07	5.18915e-06
NR_040469.1	5031425E22Rik	0.918255	342.787	0.174619	5.25863	1.45129e-07	4.91412e-06
NM_007984.2	Fscn1	-0.935747	1470.54	0.177924	-5.25924	1.44648e-07	4.90872e-06
NM_008968.4	Ptgis	1.90742	151.881	0.362244	5.26556	1.3976e-07	4.75396e-06
XM_036156202.1	Rars	1.24299	373.013	0.236062	5.26554	1.39776e-07	4.75396e-06
XR_004940109.1	Psat1	1.07723	253.026	0.204161	5.27638	1.31759e-07	4.50133e-06
NM_001289531.1	Cndp2	1.37351	552.847	0.260185	5.27899	1.29901e-07	4.44781e-06
XM_006508155.4	Tmem219	0.923599	160.034	0.174804	5.28363	1.2665e-07	4.34624e-06
XM_006541408.4	Dock11	-1.22596	97.693	0.231708	-5.29096	1.21673e-07	4.18485e-06
NM_174960.2	Gimap9	1.71248	154.015	0.323606	5.29187	1.21069e-07	4.17345e-06
NM_138669.1	Eif4a3	0.618015	936.669	0.116766	5.29278	1.20468e-07	4.16213e-06
NM_010831.3	Sik1	2.50761	363.225	0.47318	5.29948	1.16132e-07	4.02144e-06
Gm11847	Gm11847	0.540205	929.41	0.101933	5.29959	1.16064e-07	4.02144e-06
Gm16385	Gm16385	1.07603	122.951	0.202888	5.30357	1.13557e-07	3.95019e-06
Gm9892	Gm9892	0.963775	1818.39	0.181677	5.30489	1.12742e-07	3.93077e-06
XM_030254307.1	Camkk2	-1.00653	455.669	0.189643	-5.3075	1.1114e-07	3.88378e-06
XR_001785109.3	Edem1	0.739584	439.936	0.139098	5.317	1.05492e-07	3.69488e-06
Tpi-rs11	Tpi-rs11	1.02658	146.076	0.193024	5.3184	1.04683e-07	3.67499e-06
NM_023418.2	Pgam1	0.790806	874.432	0.148631	5.32062	1.03416e-07	3.63885e-06
Gm13493	Gm13493	0.685814	629.016	0.128705	5.32857	9.89915e-08	3.49122e-06
XM_006526816.4	Dtx4	-1.29491	358.401	0.24297	-5.3295	9.84813e-08	3.48127e-06
NM_178891.5	Prmt6	1.01103	63.6098	0.189294	5.34102	9.24238e-08	3.27472e-06
NM_027154.5	Tmbim1	1.219	315.745	0.227855	5.34989	8.80076e-08	3.1255e-06
NM_025359.3	Tspan13	-1.0494	1975.55	0.195864	-5.3578	8.42405e-08	2.99869e-06
XM_036163222.1	Alg5	1.22823	215.584	0.228926	5.3652	8.08609e-08	2.88868e-06
NM_023735.2	Actr3	0.765822	1372.55	0.142745	5.36497	8.09609e-08	2.88868e-06
NM_001042534.3	Capg	1.88561	482.098	0.35107	5.37105	7.82791e-08	2.8061e-06
NR_028096.1	Rabggtb	0.559751	301.435	0.104154	5.37425	7.69023e-08	2.76323e-06
NM_010683.2	Lamc1	1.58348	353.416	0.294566	5.37564	7.631e-08	2.74842e-06
XM_036155514.1	Pawr	2.15822	76.2717	0.400131	5.39378	6.89914e-08	2.50077e-06
NM_001013371.2	Dtx3l	1.07516	684.49	0.199361	5.39305	6.92702e-08	2.50077e-06
NM_007451.4	Slc25a5	0.742506	1398.33	0.137676	5.39314	6.92377e-08	2.50077e-06
Gm8399	Gm8399	1.27497	165.579	0.236295	5.39566	6.82728e-08	2.48237e-06
XM_036165786.1	Ccnd2	-1.04383	407.169	0.193283	-5.40056	6.64326e-08	2.42122e-06
NM_013869.5	Tnfrsf19	-2.14716	479.001	0.397225	-5.40539	6.46682e-08	2.36256e-06
NM_175103.3	Bola2	0.623163	320.559	0.115189	5.40994	6.30471e-08	2.30885e-06
NM_013463.2	Gla	1.94897	58.2137	0.360206	5.41072	6.27708e-08	2.30426e-06
NR_030719.1	Gvin-ps3	2.12961	45.3746	0.392874	5.4206	5.94e-08	2.18578e-06
Gm2574	Gm2574	1.46575	37.6828	0.27011	5.42651	5.74677e-08	2.11978e-06
XM_030254567.2	Adgrl3	-1.10348	144.072	0.203279	-5.42839	5.6865e-08	2.10263e-06
NM_178711.3	Plscr4	-2.2241	75.2592	0.409483	-5.43149	5.58854e-08	2.07142e-06
NM_009954.3	Bcar1	1.42312	456.009	0.261975	5.43225	5.56475e-08	2.06762e-06
NR_169088.1	Gm53055	0.727276	507.001	0.133845	5.43371	5.51929e-08	2.05573e-06
NM_001166376.1	Ms4a6c	4.02609	113.999	0.739527	5.44415	5.20538e-08	1.94355e-06
NM_007536.2	Bcl2a1d	1.19882	245.613	0.220052	5.44791	5.09665e-08	1.90762e-06
NM_001357117.1	Fcgrt	-1.01127	1174.49	0.185505	-5.45147	4.99552e-08	1.87436e-06
NM_008176.3	Cxcl1	4.74178	308.024	0.868795	5.45788	4.81862e-08	1.81244e-06
XM_011243887.4	Efr3b	-1.09656	434.473	0.200893	-5.45841	4.80419e-08	1.81148e-06
NM_001159724.1	Nectin2	1.07113	148.557	0.196187	5.45974	4.76842e-08	1.80333e-06
NM_001163539.1	Tasl	-2.14229	32.0261	0.392385	-5.45965	4.77078e-08	1.80333e-06
NM_133662.2	Ier3	4.17307	4667.24	0.76413	5.4612	4.72917e-08	1.7965e-06
NM_013671.3	Sod2	0.827669	716.162	0.151497	5.46328	4.67405e-08	1.78397e-06
NM_080444.5	Asb10	-4.7778	21.0015	0.874593	-5.46289	4.6845e-08	1.78397e-06
XM_036163141.1	Fam102b	-1.43848	542.465	0.262717	-5.47541	4.36509e-08	1.67066e-06
Actr3-ps	Actr3-ps	0.687524	561.225	0.12553	5.47699	4.3263e-08	1.65997e-06
NM_013819.2	H2-M3	1.49319	191.076	0.27231	5.48343	4.17151e-08	1.60461e-06
NM_013563.4	Il2rg	1.75293	328.775	0.319352	5.48903	4.04154e-08	1.55855e-06
NM_001363430.1	Kars	0.812178	676.828	0.147832	5.49392	3.93105e-08	1.51978e-06
Gm9774	Gm9774	0.651475	635.95	0.118578	5.49405	3.92819e-08	1.51978e-06
NM_024188.6	Oxct1	-0.975237	2380.13	0.177496	-5.49443	3.91971e-08	1.51978e-06
NM_001368668.1	Gpr52	-1.82646	29.1671	0.332357	-5.49549	3.89635e-08	1.51789e-06
NM_053078.4	Nrep	-0.999748	425.738	0.181663	-5.50331	3.72731e-08	1.45575e-06
XR_004942673.1	Gm43380	-3.40708	54.5107	0.617878	-5.51417	3.50439e-08	1.37219e-06
NM_017466.5	Ccrl2	2.78078	252.38	0.503846	5.51912	3.40711e-08	1.33753e-06
Gm4184	Gm4184	1.16024	308.272	0.209889	5.52788	3.24121e-08	1.27568e-06
XM_036156140.1	Rbm3-ps	2.3808	424.99	0.430311	5.53274	3.15261e-08	1.24402e-06
Mif-ps3	Mif-ps3	1.21603	40.9836	0.219757	5.53351	3.13894e-08	1.24183e-06
NM_001042660.1	Smad7	-0.629313	332.191	0.113684	-5.53564	3.10086e-08	1.22995e-06
NM_001177621.1	Slc5a6	-1.2851	104.742	0.231705	-5.54628	2.91806e-08	1.16046e-06
XM_006539647.5	Pou2f2	-1.73257	253.834	0.311978	-5.5535	2.80003e-08	1.11643e-06
NM_177753.3	Sox21	-2.60784	43.9897	0.469472	-5.55483	2.77889e-08	1.1109e-06
NM_009763.3	Bst1	2.8386	41.18	0.510859	5.55652	2.75202e-08	1.10305e-06
XM_006514046.5	Dyrk2	-0.678477	221.644	0.1221	-5.55673	2.74868e-08	1.10305e-06
NM_001308489.1	Vegfd	-6.74316	10.0432	1.21339	-5.55728	2.74008e-08	1.10305e-06
Gm9790	Gm9790	1.41995	512.082	0.255397	5.55979	2.70104e-08	1.09121e-06
NM_007793.3	Cstb	1.60476	1404.68	0.288467	5.56307	2.65075e-08	1.07373e-06
NR_002883.1	Gm5643	1.05563	495.97	0.189595	5.56781	2.57968e-08	1.04772e-06
NM_001166409.2	Rbm3	2.37149	460.879	0.425607	5.57201	2.51819e-08	1.02548e-06
NM_001081145.1	Tigd2	0.828814	398.521	0.148642	5.57591	2.46242e-08	1.00544e-06
XM_036164820.1	Hgf	1.89384	43.0089	0.33925	5.58243	2.3718e-08	9.71038e-07
Gm9115	Gm9115	2.07887	49.0665	0.372135	5.58634	2.31905e-08	9.51996e-07
NM_010708.2	Lgals9	1.31267	1559.54	0.234422	5.59963	2.14808e-08	8.84186e-07
NM_009197.2	Slc16a2	-1.80046	411.915	0.320727	-5.61368	1.98068e-08	8.17486e-07
NR_029468.1	Snhg12	1.40605	88.7031	0.25016	5.62062	1.9027e-08	7.8743e-07
NM_001359034.1	Gna13	4.6094	232.378	0.818443	5.63192	1.78212e-08	7.39532e-07
XM_036163571.1	Rcc2	0.993993	102.898	0.176483	5.63224	1.77881e-08	7.39532e-07
NM_009503.4	Vcp	0.844404	2815.31	0.149916	5.6325	1.77612e-08	7.39532e-07
NM_011331.3	Ccl12	3.87109	1677.67	0.687112	5.63385	1.76228e-08	7.3731e-07
Gm5521	Gm5521	0.410249	445.783	0.072763	5.63815	1.71884e-08	7.2111e-07
NM_020259.4	Hhip	-1.82509	29.6232	0.32345	-5.64256	1.6754e-08	7.04822e-07
NM_133349.3	Zfand2a	2.64967	713.845	0.468259	5.65856	1.52645e-08	6.43932e-07
Gm7665	Gm7665	1.95741	61.2993	0.345718	5.66187	1.49729e-08	6.33384e-07
XM_006502930.4	Tek	-2.51279	386.338	0.443649	-5.6639	1.47968e-08	6.2767e-07
NM_011609.4	Tnfrsf1a	0.715844	831.281	0.126219	5.67144	1.41601e-08	6.02337e-07
NM_025285.2	Stmn2	-0.533946	1166.76	0.0940955	-5.67451	1.39089e-08	5.93303e-07
NM_023260.2	Mrps34	0.96221	226.99	0.169506	5.67655	1.37435e-08	5.8789e-07
NM_009192.3	Sla	0.817594	808.178	0.144029	5.67659	1.37409e-08	5.8789e-07
NM_178892.5	Tiparp	2.80267	692.7	0.493058	5.68426	1.31379e-08	5.65153e-07
XM_006538523.4	Dvl1	-4.64085	164.167	0.815574	-5.69028	1.2683e-08	5.47126e-07
Vcp-rs	Vcp-rs	0.782782	1054.42	0.137277	5.70222	1.18255e-08	5.11578e-07
NM_028375.3	Rtl8c	0.901783	1865.42	0.157732	5.71718	1.08309e-08	4.69884e-07
Rps13-ps1	Rps13-ps1	0.582186	861.479	0.101824	5.7176	1.08042e-08	4.69884e-07
NM_001349093.1	Smim27	-1.28776	78.5632	0.22517	-5.71907	1.07108e-08	4.67325e-07
NM_009805.4	Cflar	2.04051	49.804	0.356714	5.7203	1.06334e-08	4.65279e-07
NM_007927.3	Emd	0.64799	520.608	0.113199	5.72436	1.03825e-08	4.55608e-07
NM_016740.3	S100a11	1.80086	777.126	0.313608	5.74241	9.33412e-09	4.10782e-07
XM_030245756.2	Prpsap2	-1.49779	230.287	0.259812	-5.76492	8.16977e-09	3.60579e-07
NM_180678.3	Gars	0.937698	726.61	0.162552	5.7686	7.99338e-09	3.53817e-07
NM_009371.3	Tgfbr2	-0.614572	1248.43	0.106447	-5.77351	7.7635e-09	3.44641e-07
NM_028544.1	Rasip1	1.41287	1557.76	0.244676	5.77446	7.71998e-09	3.43708e-07
XM_017315418.2	Nfil3	2.86863	178.193	0.496205	5.78114	7.41975e-09	3.31307e-07
NM_028179.1	2200002D01Rik	2.79126	49.5831	0.482647	5.78323	7.32819e-09	3.28178e-07
NM_020561.2	Smpdl3a	-1.11573	253.334	0.19277	-5.78791	7.12675e-09	3.20096e-07
NM_175093.2	Trib3	1.68498	66.6286	0.290547	5.79936	6.65688e-09	2.99874e-07
NM_019963.2	Stat2	1.33467	315.74	0.230086	5.80073	6.60284e-09	2.98319e-07
NM_015803.3	Atp8a2	-2.38975	61.0225	0.411122	-5.81275	6.14559e-09	2.78485e-07
NM_009226.4	Snrpd1	0.864348	830.827	0.148659	5.81429	6.08932e-09	2.76756e-07
NR_152154.1	Gm29679	-1.27022	722.11	0.218445	-5.81482	6.06981e-09	2.76693e-07
XR_004934042.1	Plaur	-2.51131	25.2473	0.42734	-5.8766	4.18779e-09	1.91472e-07
NM_007534.3	Bcl2a1b	1.22489	371.27	0.208387	5.87797	4.15319e-09	1.9046e-07
NM_145135.3	Rnh1	1.68748	803.709	0.287055	5.87859	4.13765e-09	1.90319e-07
NM_019730.2	Nme3	-1.02313	181.094	0.173912	-5.88302	4.02838e-09	1.85853e-07
XM_030252611.2	Tlr2	1.67729	292.829	0.284994	5.88536	3.9719e-09	1.83803e-07
NM_011660.3	Txn1	1.05494	1156.96	0.178878	5.8975	3.69043e-09	1.71296e-07
NM_001077189.1	Fcgr2b	1.08889	422.045	0.184612	5.89825	3.67385e-09	1.71047e-07
XM_006510451.4	Dixdc1	-0.945507	167.793	0.160097	-5.90585	3.50842e-09	1.63844e-07
NM_008036.2	Fosb	2.99009	262.479	0.506205	5.90687	3.48676e-09	1.63332e-07
NM_024215.2	Zfp593	1.59151	117.332	0.269263	5.91062	3.4083e-09	1.60148e-07
Gm7336	Gm7336	1.40006	196.533	0.236698	5.91496	3.31953e-09	1.56458e-07
XM_030244719.2	Klhdc8b	-1.24018	129.677	0.209018	-5.93337	2.96785e-09	1.40316e-07
Gm9844	Gm9844	1.15201	1430.78	0.194039	5.93698	2.90328e-09	1.37689e-07
NM_009601.4	Chrnb1	1.71802	49.1724	0.289131	5.94202	2.81539e-09	1.33937e-07
[truncated: 5,274 more rows]

## Sheet: GSEA-Results
geneSet	description	link	enrichmentScore	normalizedEnrichmentScore	pValue	FDR	size	plotPath	leadingEdgeNum	leadingEdgeId	userId
GO:0034341	response to interferon-gamma	http://amigo.geneontology.org/amigo/term/GO:0034341	0.726617	2.66692	0	0	28	./Project_wg_result1631091410_GSEA/GO_0034341.png	18	626578;100702;20302;20296;16362;14469;20293;20303;100039796;12703;229898;17472;20304;68713;66102;66141;24088;104252	Ccl12;Ccl2;Ccl3;Ccl4;Ccl5;Cdc42ep2;Cxcl16;Gbp10;Gbp2;Gbp4;Gbp5;Gbp6;Ifitm1;Ifitm3;Irf1;Socs1;Tgtp2;Tlr2
GO:0002237	response to molecule of bacterial origin	http://amigo.geneontology.org/amigo/term/GO:0002237	0.583864	2.60845	0	0	68	./Project_wg_result1631091410_GSEA/GO_0002237.png	35	11535;15945;17329;626578;14825;16068;100702;20302;20296;56066;14469;20293;246256;19225;14281;12608;56722;20304;21929;12475;16819;22695;66102;16477;230738;211770;19219;12257;24088;12010;70097;18035;16476;17319;14991	Adm;B2m;Ccl12;Ccl2;Ccl3;Ccl5;Cd14;Cebpb;Cxcl1;Cxcl10;Cxcl11;Cxcl16;Cxcl9;Fcgr4;Fos;Gbp10;Gbp2;Gbp6;H2-M3;Il18bp;Jun;Junb;Lcn2;Litaf;Mif;Nfkbia;Ptger4;Ptgs2;Sash1;Tlr2;Tnfaip3;Trib1;Tspo;Zc3h12a;Zfp36
GO:0071216	cellular response to biotic stimulus	http://amigo.geneontology.org/amigo/term/GO:0071216	0.604606	2.51699	0	0	51	./Project_wg_result1631091410_GSEA/GO_0071216.png	26	15945;17329;626578;14825;100702;20302;20296;56066;14469;20293;246256;12608;56722;20304;21929;12475;16819;22695;66102;230738;211770;12257;24088;70097;18035;17319	Ccl12;Ccl2;Ccl3;Ccl5;Cd14;Cebpb;Cxcl1;Cxcl10;Cxcl11;Cxcl16;Cxcl9;Fcgr4;Gbp10;Gbp2;Gbp6;Lcn2;Litaf;Mif;Nfkbia;Sash1;Tlr2;Tnfaip3;Trib1;Tspo;Zc3h12a;Zfp36
GO:0031349	positive regulation of defense response	http://amigo.geneontology.org/amigo/term/GO:0031349	0.54189	2.42955	0	0	69	./Project_wg_result1631091410_GSEA/GO_0031349.png	32	11820;246746;58203;14825;20302;16362;226691;381308;19225;12608;226695;16149;102639543;53610;11501;15951;229898;20304;52118;18413;21929;12475;58185;19219;15040;24088;74136;18035;216869;17319;14991;80861	Adam8;App;Arrb2;Ccl3;Ccl5;Cd14;Cd300lf;Cd74;Cebpb;Cxcl1;Dhx58;Gbp5;H2-M3;H2-T23;Ifi204;Ifi205;Ifi206;Ifi207;Ifi211;Irf1;Mif;Nfkbia;Nono;Osm;Ptger4;Ptgs2;Pvr;Rsad2;Sec14l1;Tlr2;Tnfaip3;Zbp1
GO:0070371	ERK1 and ERK2 cascade	http://amigo.geneontology.org/amigo/term/GO:0070371	0.570427	2.39955	0	0	48	./Project_wg_result1631091410_GSEA/GO_0070371.png	26	11820;56089;20302;20296;16007;20293;20303;15461;384009;16149;11910;19252;20304;12156;24066;13836;12633;21859;19219;24088;15894;216869;16476;17319;14219;327957	App;Arrb2;Atf3;Bmp2;Ccl12;Ccl2;Ccl3;Ccl4;Ccl5;Ccn1;Ccn2;Cd74;Cflar;Dusp1;Epha2;Glipr2;Hras;Icam1;Jun;Mif;Ptger4;Ramp3;Scimp;Spry4;Timp3;Tlr2
GO:0045088	regulation of innate immune response	http://amigo.geneontology.org/amigo/term/GO:0045088	0.534577	2.23068	0	0.000569704	54	./Project_wg_result1631091410_GSEA/GO_0045088.png	28	246746;58203;16362;226691;381308;12703;226695;16149;12258;102639543;53610;11501;15951;229898;52118;21929;12475;56045;58185;15040;24088;74136;18035;216869;14991;80861;231712;16859	Adam8;Arrb2;Cd14;Cd300lf;Cd74;Dhx58;Gbp5;H2-M3;H2-T23;Ifi204;Ifi205;Ifi206;Ifi207;Ifi211;Irf1;Lgals9;Nfkbia;Nono;Pvr;Rsad2;Samhd1;Sec14l1;Serping1;Socs1;Tlr2;Tnfaip3;Trafd1;Zbp1
GO:0001525	angiogenesis	http://amigo.geneontology.org/amigo/term/GO:0001525	0.484841	2.27534	0	0.000610397	89	./Project_wg_result1631091410_GSEA/GO_0001525.png	41	11535;15945;101401;11601;18654;56089;381823;11504;20296;16007;30878;20293;19225;27279;15200;22375;11501;20304;14674;12562;12306;12827;13836;20620;19223;230738;15234;17125;107817;107702;26903;52014;70097;16476;18655;57875;14219;13601;80837;13609;69903	Adam8;Adamts1;Adamts9;Adm;Angpt2;Angptl4;Anxa2;Apln;Apold1;Ccl12;Ccl2;Ccl5;Ccn1;Ccn2;Cdh5;Col4a2;Cxcl10;Dysf;Ecm1;Epha2;Gna13;Hbegf;Hgf;Jmjd6;Jun;Nus1;Pgf;Pgk1;Plk2;Ptgis;Ptgs2;Ramp3;Rasip1;Rhoj;Rnh1;S1pr1;Sash1;Smad1;Tnfrsf12a;Wars;Zc3h12a
GO:0019221	cytokine-mediated signaling pathway	http://amigo.geneontology.org/amigo/term/GO:0019221	0.547626	2.26066	0	0.000633004	48	./Project_wg_result1631091410_GSEA/GO_0019221.png	20	15945;17329;246746;58203;14825;20302;20296;56066;16362;20293;20303;12703;16149;20304;12363;54199;18413;56045;68713;66141	Casp4;Ccl12;Ccl2;Ccl3;Ccl4;Ccl5;Ccrl2;Cd300lf;Cd74;Cxcl1;Cxcl10;Cxcl11;Cxcl9;Ifitm1;Ifitm3;Irf1;Osm;Samhd1;Socs1;Zbp1
GO:0034612	response to tumor necrosis factor	http://amigo.geneontology.org/amigo/term/GO:0034612	0.597796	2.28244	0	0.00071213	33	./Project_wg_result1631091410_GSEA/GO_0034612.png	15	16068;20302;20296;16362;20293;20303;19225;20304;12363;12475;11796;16819;22695;66102;230738	Birc3;Casp4;Ccl12;Ccl2;Ccl3;Ccl4;Ccl5;Cd14;Cxcl16;Il18bp;Irf1;Lcn2;Ptgs2;Zc3h12a;Zfp36
GO:0097191	extrinsic apoptotic signaling pathway	http://amigo.geneontology.org/amigo/term/GO:0097191	0.605466	2.26074	0	0.00071213	31	./Project_wg_result1631091410_GSEA/GO_0097191.png	21	414801;27279;11910;21933;21929;79201;16819;12633;21859;15234;15894;16905;29810;12044;12045;69660;12047;12048;20439;17210;19165	Atf3;Bag3;Bcl2a1a;Bcl2a1b;Bcl2a1d;Bcl2l1;Cflar;Hgf;Icam1;Itprip;Lcn2;Lmna;Mcl1;Psen2;Siah2;Timp3;Tmbim1;Tnfaip3;Tnfrsf10b;Tnfrsf12a;Tnfrsf23
GO:0072503	cellular divalent inorganic cation homeostasis	http://amigo.geneontology.org/amigo/term/GO:0072503	0.498131	2.17149	0	0.000776869	58	./Project_wg_result1631091410_GSEA/GO_0072503.png	19	11820;20855;11535;15945;17329;56089;14825;20302;20296;56066;20293;14744;17748;17750;20304;54199;14674;18442;12306	Adm;Anxa2;App;Ccl12;Ccl2;Ccl3;Ccl5;Ccrl2;Cxcl1;Cxcl10;Cxcl11;Cxcl9;Gna13;Gpr65;Mt1;Mt2;P2ry2;Ramp3;Stc1
GO:0009615	response to virus	http://amigo.geneontology.org/amigo/term/GO:0009615	0.519226	2.13252	0	0.00120514	48	./Project_wg_result1631091410_GSEA/GO_0009615.png	26	15945;17329;58203;16362;100039796;17472;20304;56045;58185;16819;217069;68713;76933;66141;230738;74136;231655;80861;17858;16859;12051;67775;12048;98053;209200;12631	Bcl2l1;Bcl3;Ccl5;Cfl1;Cxcl10;Cxcl9;Dhx58;Dtx3l;Gbp4;Gtf2f1;Ifi27l2a;Ifitm1;Ifitm3;Irf1;Lcn2;Lgals9;Mx2;Oasl1;Rsad2;Rtp4;Samhd1;Sec14l1;Tgtp2;Trim25;Zbp1;Zc3h12a
GO:0070555	response to interleukin-1	http://amigo.geneontology.org/amigo/term/GO:0070555	0.614836	2.11214	0	0.00123436	23	./Project_wg_result1631091410_GSEA/GO_0070555.png	10	20302;20296;16362;20293;20303;12608;20304;16819;19223;230738	Ccl12;Ccl2;Ccl3;Ccl4;Ccl5;Cebpb;Irf1;Lcn2;Ptgis;Zc3h12a
GO:0044706	multi-multicellular organism process	http://amigo.geneontology.org/amigo/term/GO:0044706	0.58995	2.13466	0	0.00130557	28	./Project_wg_result1631091410_GSEA/GO_0044706.png	11	20855;11535;11601;18654;20296;19225;14281;14282;22228;16477;19223	Adm;Angpt2;Ccl2;Fos;Fosb;Junb;Pgf;Ptgis;Ptgs2;Stc1;Ucp2
GO:0044419	interspecies interaction between organisms	http://amigo.geneontology.org/amigo/term/GO:0044419	0.482677	2.11979	0	0.00132253	66	./Project_wg_result1631091410_GSEA/GO_0044419.png	34	246746;58203;14825;100702;20302;20296;14469;20303;16149;20304;52118;12306;58185;22695;217069;68713;66141;230738;24088;15894;16476;231655;671535;17858;18412;12048;16852;12520;19294;12631;73666;18453;211948;18550	Anxa2;Bcl2l1;Ccl2;Ccl3;Ccl4;Ccl5;Cd300lf;Cd74;Cd81;Cfl1;Cxcl1;Furin;Gbp2;Gbp6;Icam1;Ifitm1;Ifitm3;Jun;Lgals1;Mx2;Nectin2;Oasl1;P4hb;Parp10;Pde12;Pvr;Rsad2;Sqstm1;Thoc3;Tlr2;Trim25;Zbp1;Zc3h12a;Zfp36
GO:0019882	antigen processing and presentation	http://amigo.geneontology.org/amigo/term/GO:0019882	0.611967	2.09454	0	0.00151328	24	./Project_wg_result1631091410_GSEA/GO_0019882.png	18	110557;16149;14972;16913;65972;15039;15040;213233;15894;12010;19186;14991;19188;16912;14130;19698;76438;22034	B2m;Cd74;Fcgr2b;H2-K1;H2-M3;H2-Q6;H2-T22;H2-T23;Icam1;Ifi30;Psmb8;Psmb9;Psme1;Psme2;Relb;Rftn1;Tapbpl;Traf6
GO:0043900	regulation of multi-organism process	http://amigo.geneontology.org/amigo/term/GO:0043900	0.472119	2.07183	0	0.00184316	61	./Project_wg_result1631091410_GSEA/GO_0043900.png	34	16324;14825;20302;20303;16149;17472;20304;18442;21929;12306;58185;22695;217069;68713;66141;230738;211770;24088;70097;74136;16476;17319;231655;80861;671535;17858;16859;18412;16852;209200;19294;12631;18453;211948	Anxa2;Ccl3;Ccl4;Ccl5;Cd74;Cfl1;Cxcl1;Dhx58;Dtx3l;Gbp4;Ifitm1;Ifitm3;Inhbb;Jun;Lgals1;Lgals9;Mif;Mx2;Nectin2;Oasl1;P2ry2;P4hb;Parp10;Pde12;Rsad2;Sash1;Sec14l1;Sqstm1;Tlr2;Tnfaip3;Trib1;Trim25;Zc3h12a;Zfp36
GO:0050727	regulation of inflammatory response	http://amigo.geneontology.org/amigo/term/GO:0050727	0.491033	2.05596	0	0.00217387	53	./Project_wg_result1631091410_GSEA/GO_0050727.png	23	11820;20302;12702;19225;13024;12608;12258;11501;229898;20304;12182;18413;12562;21929;22695;19223;230738;11815;15234;19219;24088;18035;17319	Adam8;Apod;App;Bst1;Ccl3;Ccl5;Cdh5;Cebpb;Ctla2a;Gbp5;Hgf;Mif;Nfkbia;Osm;Ptger4;Ptgis;Ptgs2;Serping1;Socs3;Tlr2;Tnfaip3;Zc3h12a;Zfp36
GO:0031348	negative regulation of defense response	http://amigo.geneontology.org/amigo/term/GO:0031348	0.572146	2.05671	0	0.00229464	30	./Project_wg_result1631091410_GSEA/GO_0031348.png	19	12702;13024;12258;12562;21929;56045;22695;19223;230738;11815;15234;19219;15040;74136;216869;80861;231712;210029;16859	Apod;Arrb2;Cdh5;Ctla2a;Dhx58;H2-T23;Hgf;Lgals9;Metrnl;Ptger4;Ptgis;Samhd1;Sec14l1;Serping1;Socs3;Tnfaip3;Trafd1;Zc3h12a;Zfp36
GO:0031099	regeneration	http://amigo.geneontology.org/amigo/term/GO:0031099	0.521833	2.04234	0	0.00263488	37	./Project_wg_result1631091410_GSEA/GO_0031099.png	17	11535;11601;18654;20296;12608;66175;12575;22228;15982;12633;11815;15234;12257;26903;16476;17319;12534	Adm;Angpt2;Apod;Ccl2;Cdk1;Cdkn1a;Cebpb;Cflar;Dysf;Hgf;Ifrd1;Jun;Mif;Mustn1;Pgf;Tspo;Ucp2
GO:0060326	cell chemotaxis	http://amigo.geneontology.org/amigo/term/GO:0060326	0.496299	2.03301	0	0.00291634	46	./Project_wg_result1631091410_GSEA/GO_0060326.png	26	15945;17329;18654;14825;20302;20296;56066;20293;20303;12642;15200;16149;11501;19252;20304;12182;54199;13836;66102;20750;15234;26903;216869;17319;12927;13609	Adam8;Arrb2;Bcar1;Bst1;Ccl12;Ccl2;Ccl3;Ccl4;Ccl5;Ccrl2;Cd74;Ch25h;Cxcl1;Cxcl10;Cxcl11;Cxcl16;Cxcl9;Dusp1;Dysf;Epha2;Hbegf;Hgf;Mif;Pgf;S1pr1;Spp1
GO:0055074	calcium ion homeostasis	http://amigo.geneontology.org/amigo/term/GO:0055074	0.468849	2.02423	0	0.00322007	55	./Project_wg_result1631091410_GSEA/GO_0055074.png	17	11820;20855;11535;15945;17329;56089;14825;20302;20296;56066;20293;14744;20304;54199;14674;18442;12306	Adm;Anxa2;App;Ccl12;Ccl2;Ccl3;Ccl5;Ccrl2;Cxcl1;Cxcl10;Cxcl11;Cxcl9;Gna13;Gpr65;P2ry2;Ramp3;Stc1
GO:1901652	response to peptide	http://amigo.geneontology.org/amigo/term/GO:1901652	0.449587	2.02511	0	0.00336643	69	./Project_wg_result1631091410_GSEA/GO_1901652.png	27	11820;23886;238393;11535;16324;56089;20296;12702;64899;16362;20715;19225;12703;12363;21929;22228;12633;228775;21853;18035;14219;13685;217715;12927;16418;22352;53322	Adm;App;Bcar1;Casp4;Ccl2;Ccn2;Cflar;Eif2b2;Eif4ebp1;Eif6;Gdf15;Inhbb;Irf1;Lpin3;Nfkbia;Nucb2;Ptgs2;Ramp3;Serpina3f;Serpina3g;Socs1;Socs3;Timeless;Tnfaip3;Trib3;Ucp2;Vim
GO:0046683	response to organophosphorus	http://amigo.geneontology.org/amigo/term/GO:0046683	0.588691	2.01773	0	0.00344196	23	./Project_wg_result1631091410_GSEA/GO_0046683.png	7	11820;20855;20296;19225;14281;14282;19252	App;Ccl2;Dusp1;Fos;Fosb;Ptgs2;Stc1
GO:0014074	response to purine-containing compound	http://amigo.geneontology.org/amigo/term/GO:0014074	0.571738	2.0051	0	0.00393096	24	./Project_wg_result1631091410_GSEA/GO_0014074.png	7	11820;20855;20296;19225;14281;14282;19252	App;Ccl2;Dusp1;Fos;Fosb;Ptgs2;Stc1
GO:0071706	tumor necrosis factor superfamily cytokine production	http://amigo.geneontology.org/amigo/term/GO:0071706	0.535671	1.99536	0	0.00432756	32	./Project_wg_result1631091410_GSEA/GO_0071706.png	19	11820;20302;20296;20303;11501;21929;12475;22695;230738;19219;12257;15040;24088;216869;17319;16859;12051;67581;74155	Adam8;App;Arrb2;Bcl3;Ccl2;Ccl3;Ccl4;Cd14;Errfi1;H2-T23;Lgals9;Mif;Ptger4;Tbc1d23;Tlr2;Tnfaip3;Tspo;Zc3h12a;Zfp36
GO:1901342	regulation of vasculature development	http://amigo.geneontology.org/amigo/term/GO:1901342	0.457417	1.96967	0	0.00564429	60	./Project_wg_result1631091410_GSEA/GO_1901342.png	26	11535;15945;101401;11601;18654;11504;20296;19225;27279;22375;20304;12562;12827;13836;20620;12633;19223;230738;15234;19219;17125;107702;70097;18655;13601;80837	Adamts1;Adamts9;Adm;Angpt2;Ccl2;Ccl5;Cdh5;Cflar;Col4a2;Cxcl10;Ecm1;Epha2;Hgf;Pgf;Pgk1;Plk2;Ptger4;Ptgis;Ptgs2;Rhoj;Rnh1;Sash1;Smad1;Tnfrsf12a;Wars;Zc3h12a
GO:0050900	leukocyte migration	http://amigo.geneontology.org/amigo/term/GO:0050900	0.460539	1.95347	0	0.0072739	56	./Project_wg_result1631091410_GSEA/GO_0050900.png	27	11820;15945;17329;18654;14825;20302;20296;56066;20293;20303;12642;16149;11501;19252;20304;12182;114774;66102;20750;11815;19219;24088;26903;15894;17319;13601;13609	Adam8;Apod;App;Bst1;Ccl12;Ccl2;Ccl3;Ccl4;Ccl5;Cd74;Ch25h;Cxcl1;Cxcl10;Cxcl11;Cxcl16;Cxcl9;Dusp1;Dysf;Ecm1;Icam1;Mif;Pawr;Pgf;Ptger4;S1pr1;Spp1;Tlr2
GO:0042594	response to starvation	http://amigo.geneontology.org/amigo/term/GO:0042594	0.518477	1.9428	0	0.00775976	35	./Project_wg_result1631091410_GSEA/GO_0042594.png	13	22271;11535;16324;140742;11910;12575;17691;22695;22228;230738;16476;57875;13685	Adm;Angptl4;Atf3;Cdkn1a;Eif4ebp1;Inhbb;Jun;Sesn1;Sik1;Ucp2;Upp1;Zc3h12a;Zfp36
GO:0042692	muscle cell differentiation	http://amigo.geneontology.org/amigo/term/GO:0042692	0.48478	1.93695	0	0.00778596	43	./Project_wg_result1631091410_GSEA/GO_0042692.png	18	23886;11535;15945;17329;12156;17691;216850;15982;13660;12633;15205;54720;11443;26903;16905;216869;18655;12534	Adm;Arrb2;Bmp2;Cdk1;Cflar;Chrnb1;Cxcl10;Cxcl9;Dysf;Ehd1;Gdf15;Hes1;Ifrd1;Kdm6b;Lmna;Pgk1;Rcan1;Sik1
GO:0007187	G protein-coupled receptor signaling pathway, coupled to cyclic nucleotide second messenger	http://amigo.geneontology.org/amigo/term/GO:0007187	0.537783	1.93178	0.00206612	0.00794829	30	./Project_wg_result1631091410_GSEA/GO_0007187.png	9	11535;15945;17329;56089;56066;14744;83397;14674;54672	Adgrg3;Adm;Akap12;Cxcl10;Cxcl11;Cxcl9;Gna13;Gpr65;Ramp3
GO:0007568	aging	http://amigo.geneontology.org/amigo/term/GO:0007568	0.466051	1.91343	0.00225734	0.00850367	48	./Project_wg_result1631091410_GSEA/GO_0007568.png	23	11820;11535;20296;19225;14281;15461;56722;12575;12827;22228;114774;76933;20620;12571;11815;12257;16905;16476;17319;14219;12534;17191;15902	Adm;Apod;App;Ccl2;Ccn2;Cdk1;Cdk6;Cdkn1a;Col4a2;Fos;Hras;Id2;Ifi27l2a;Jun;Litaf;Lmna;Mbd2;Mif;Pawr;Plk2;Ptgs2;Tspo;Ucp2
GO:1903320	regulation of protein modification by small protein conjugation or removal	http://amigo.geneontology.org/amigo/term/GO:1903320	0.506723	1.91875	0	0.00854556	34	./Project_wg_result1631091410_GSEA/GO_1903320.png	23	116870;17472;21929;11796;230738;211770;12257;66412;228775;26903;70097;216869;671535;13653;20439;209200;19165;30877;68077;16898;14828;12952;269523	Arrb2;Arrdc4;Birc3;Cry1;Dtx3l;Dysf;Egr1;Gbp4;Gnl3;Hspa5;Mta1;Nop53;Parp10;Psen2;Rps2;Sash1;Siah2;Tnfaip3;Trib1;Trib3;Tspo;Vcp;Zc3h12a
GO:0052547	regulation of peptidase activity	http://amigo.geneontology.org/amigo/term/GO:0052547	0.428814	1.92035	0	0.00867909	72	./Project_wg_result1631091410_GSEA/GO_0052547.png	26	11820;238393;16007;230379;20715;13025;19225;12258;12363;12268;21933;11796;15511;114774;76933;12633;21859;15234;16913;13014;19186;112407;216869;14219;19188;13601	Acer2;App;Arrb2;Birc3;C4b;Casp4;Ccn1;Ccn2;Cflar;Cstb;Ctla2b;Ecm1;Egln3;Hgf;Hspa1b;Ifi27l2a;Pawr;Psmb8;Psme1;Psme2;Ptgs2;Serpina3f;Serpina3g;Serping1;Timp3;Tnfrsf10b
GO:0043270	positive regulation of ion transport	http://amigo.geneontology.org/amigo/term/GO:0043270	0.472616	1.89179	0	0.0100512	43	./Project_wg_result1631091410_GSEA/GO_0043270.png	14	20855;15945;17329;56089;14825;20302;56066;20293;20303;12608;20304;18442;12306;72054	Anxa2;Ccl12;Ccl3;Ccl4;Ccl5;Cebpb;Cxcl1;Cxcl10;Cxcl11;Cxcl9;Cyp4f18;P2ry2;Ramp3;Stc1
GO:0002697	regulation of immune effector process	http://amigo.geneontology.org/amigo/term/GO:0002697	0.437706	1.88694	0.00204499	0.0104446	53	./Project_wg_result1631091410_GSEA/GO_0002697.png	24	14825;20296;16362;110557;16149;12258;17472;20304;52118;21929;58185;14972;230738;15039;15040;24088;12010;74136;216869;17319;14991;80861;15284;16859	Arrb2;B2m;Ccl2;Ccl5;Cd74;Cxcl1;Dhx58;Gbp4;H2-K1;H2-M3;H2-Q6;H2-T22;H2-T23;Hlx;Irf1;Lgals9;Mif;Pvr;Rsad2;Sec14l1;Serping1;Tlr2;Tnfaip3;Zc3h12a
GO:0019932	second-messenger-mediated signaling	http://amigo.geneontology.org/amigo/term/GO:0019932	0.447697	1.87265	0	0.0112401	54	./Project_wg_result1631091410_GSEA/GO_0019932.png	17	11535;15945;17329;56089;19416;20302;56066;14744;20303;17748;17750;12182;54199;14674;54672;53901;22637	Adgrg3;Adm;Bst1;Ccl3;Ccl4;Ccrl2;Cxcl10;Cxcl11;Cxcl9;Gna13;Gpr65;Mt1;Mt2;Ramp3;Rasd1;Rcan2;Zap70
GO:0071496	cellular response to external stimulus	http://amigo.geneontology.org/amigo/term/GO:0071496	0.455263	1.86829	0	0.0113191	50	./Project_wg_result1631091410_GSEA/GO_0071496.png	15	22271;16324;140742;20296;16362;19225;14281;11910;12575;18712;17691;16819;22228;230738;19219	Atf3;Ccl2;Cdkn1a;Fos;Inhbb;Irf1;Lcn2;Pim1;Ptger4;Ptgs2;Sesn1;Sik1;Ucp2;Upp1;Zc3h12a
GO:0002831	regulation of response to biotic stimulus	http://amigo.geneontology.org/amigo/term/GO:0002831	0.530614	1.84989	0.00199203	0.0134027	22	./Project_wg_result1631091410_GSEA/GO_0002831.png	18	14825;17472;20304;52118;21929;230738;211770;24088;70097;74136;17319;80861;16859;209200;19294;22034;68077;13057	Ccl5;Cxcl1;Cyba;Dhx58;Dtx3l;Gbp4;Lgals9;Mif;Nectin2;Nop53;Pvr;Sash1;Sec14l1;Tlr2;Tnfaip3;Traf6;Trib1;Zc3h12a
GO:0051346	negative regulation of hydrolase activity	http://amigo.geneontology.org/amigo/term/GO:0051346	0.445527	1.83926	0	0.0145987	54	./Project_wg_result1631091410_GSEA/GO_0051346.png	20	11820;238393;20715;13025;17872;19225;15461;12258;12268;11796;15511;12633;21859;15234;13014;216869;57875;71994;100169;13601	Angptl4;App;Arrb2;Birc3;C4b;Cflar;Cnn3;Cstb;Ctla2b;Ecm1;Hgf;Hras;Hspa1b;Phactr4;Ppp1r15a;Ptgs2;Serpina3f;Serpina3g;Serping1;Timp3
GO:0070482	response to oxygen levels	http://amigo.geneontology.org/amigo/term/GO:0070482	0.459287	1.83345	0.00234192	0.0151805	44	./Project_wg_result1631091410_GSEA/GO_0070482.png	18	20855;11535;11601;18654;381823;20296;54132;19225;11501;12156;22228;12633;19223;16905;18655;57875;14219;13685	Adam8;Adm;Angpt2;Angptl4;Apold1;Bmp2;Ccl2;Ccn2;Cflar;Eif4ebp1;Lmna;Pdlim1;Pgf;Pgk1;Ptgis;Ptgs2;Stc1;Ucp2
GO:0032103	positive regulation of response to external stimulus	http://amigo.geneontology.org/amigo/term/GO:0032103	0.427604	1.82614	0.00217865	0.0158364	52	./Project_wg_result1631091410_GSEA/GO_0032103.png	22	11820;15945;18654;14825;20302;20296;20303;19225;12608;16149;11501;229898;20304;18413;19219;24088;26903;70097;18035;17319;80861;13609	Adam8;App;Ccl2;Ccl3;Ccl4;Ccl5;Cd74;Cebpb;Cxcl1;Cxcl10;Dhx58;Dysf;Gbp5;Mif;Nfkbia;Osm;Pgf;Ptger4;Ptgs2;S1pr1;Sash1;Tlr2
GO:0042742	defense response to bacterium	http://amigo.geneontology.org/amigo/term/GO:0042742	0.494755	1.82274	0.00642398	0.0161306	28	./Project_wg_result1631091410_GSEA/GO_0042742.png	15	626578;100702;21949;14469;12608;23794;16819;14972;13836;15040;240913;24088;14991;16859;12051	Adamts4;Adamts5;Bcl3;Cebpb;Epha2;Gbp10;Gbp2;Gbp6;H2-K1;H2-M3;H2-T23;Lcn2;Lgals9;Tlr2;Tnfsf8
GO:0002791	regulation of peptide secretion	http://amigo.geneontology.org/amigo/term/GO:0002791	0.432621	1.80822	0	0.0181593	52	./Project_wg_result1631091410_GSEA/GO_0002791.png	17	16324;80885;20302;30878;12703;16149;20304;12363;18413;21929;12475;58185;22228;230738;19219;15040;24088	Apln;Casp4;Ccl3;Ccl5;Cd14;Cd74;H2-T23;Hcar2;Inhbb;Osm;Ptger4;Rsad2;Socs1;Tlr2;Tnfaip3;Ucp2;Zc3h12a
GO:0001819	positive regulation of cytokine production	http://amigo.geneontology.org/amigo/term/GO:0001819	0.400477	1.79225	0	0.0201564	63	./Project_wg_result1631091410_GSEA/GO_0001819.png	30	20302;20296;16362;20303;19225;15461;12608;16149;11501;229898;20304;12363;18413;18442;12475;58185;15234;19219;15040;24088;12010;74136;17319;14991;80861;16859;12051;67581;13653;16194	Adam8;B2m;Bcl3;Casp4;Ccl2;Ccl3;Ccl4;Ccl5;Cd14;Cd74;Cebpb;Dhx58;Egr1;Gbp5;H2-M3;H2-T23;Hgf;Hras;Il6ra;Irf1;Lgals9;Mif;Osm;P2ry2;Ptger4;Ptgs2;Rsad2;Sec14l1;Tbc1d23;Tlr2
GO:0032102	negative regulation of response to external stimulus	http://amigo.geneontology.org/amigo/term/GO:0032102	0.440682	1.79552	0.00222717	0.0201612	45	./Project_wg_result1631091410_GSEA/GO_0032102.png	23	11601;12702;20293;13024;12258;19252;12575;12562;21929;12306;22695;19223;230738;11815;15234;211770;19219;74136;17319;80861;53322;210029;16859	Angpt2;Anxa2;Apod;Ccl12;Cdh5;Cdkn1a;Ctla2a;Dhx58;Dusp1;Hgf;Lgals9;Metrnl;Mif;Nucb2;Ptger4;Ptgis;Sec14l1;Serping1;Socs3;Tnfaip3;Trib1;Zc3h12a;Zfp36
GO:0009123	nucleoside monophosphate metabolic process	http://amigo.geneontology.org/amigo/term/GO:0009123	0.467967	1.7764	0.00426439	0.0220306	32	./Project_wg_result1631091410_GSEA/GO_0009123.png	19	22271;12257;18655;17319;12862;12534;16418;227731;11565;21991;11821;12048;14635;211948;22272;11674;269523;74246;18648	Adssl1;Aldoa;Aprt;Bcl2l1;Cdk1;Cox6a2;Eif6;Gale;Galk1;Mif;Pde12;Pgam1;Pgk1;Slc25a25;Tpi1;Tspo;Upp1;Uqcrq;Vcp
GO:0045862	positive regulation of proteolysis	http://amigo.geneontology.org/amigo/term/GO:0045862	0.415136	1.76876	0.00240964	0.0228172	59	./Project_wg_result1631091410_GSEA/GO_0045862.png	20	11820;16007;230379;11501;12363;100494;21933;193740;15511;114774;76933;20620;12633;230738;211770;228775;19186;112407;14219;19188	Acer2;Adam8;App;Casp4;Ccn1;Ccn2;Cflar;Egln3;Hspa1a;Hspa1b;Ifi27l2a;Pawr;Plk2;Psme1;Psme2;Tnfrsf10b;Trib1;Trib3;Zc3h12a;Zfand2a
GO:0030099	myeloid cell differentiation	http://amigo.geneontology.org/amigo/term/GO:0030099	0.41159	1.7698	0	0.0231146	57	./Project_wg_result1631091410_GSEA/GO_0030099.png	22	11820;74481;246746;20302;14281;12608;16149;11501;20304;18574;12306;22695;100503605;13836;16477;12571;211770;107817;24088;12010;18035;16476	Adam8;Anxa2;App;B2m;Batf2;Ccl3;Ccl5;Cd300lf;Cd74;Cdk6;Cebpb;Epha2;Fos;Hbb-bs;Jmjd6;Jun;Junb;Nfkbia;Pde1b;Tlr2;Trib1;Zfp36
GO:0010959	regulation of metal ion transport	http://amigo.geneontology.org/amigo/term/GO:0010959	0.419775	1.75537	0.00455581	0.023675	51	./Project_wg_result1631091410_GSEA/GO_0010959.png	22	20855;15945;17329;56089;14825;20302;56066;20293;20303;19225;20304;17691;12306;114774;15205;12257;26903;15894;12010;216869;17319;12512	Anxa2;Arrb2;B2m;Ccl12;Ccl3;Ccl4;Ccl5;Cd63;Cxcl1;Cxcl10;Cxcl11;Cxcl9;Dysf;Hes1;Icam1;Mif;Pawr;Ptgs2;Ramp3;Sik1;Stc1;Tspo
GO:0090130	tissue migration	http://amigo.geneontology.org/amigo/term/GO:0090130	0.428768	1.75693	0.00686499	0.0237194	49	./Project_wg_result1631091410_GSEA/GO_0090130.png	17	20855;101401;11601;19225;384009;15200;11501;13836;20620;230738;52014;70097;16476;12512;80837;12927;23790	Adam8;Adamts9;Angpt2;Bcar1;Cd63;Coro1c;Epha2;Glipr2;Hbegf;Jun;Nus1;Plk2;Ptgs2;Rhoj;Sash1;Stc1;Zc3h12a
GO:0006979	response to oxidative stress	http://amigo.geneontology.org/amigo/term/GO:0006979	0.397663	1.75354	0.00455581	0.0237377	67	./Project_wg_result1631091410_GSEA/GO_0006979.png	19	11820;140742;16068;19225;14281;53610;19252;53901;21929;216850;16819;22228;114774;12633;14778;230738;11815;15234;54720	Apod;App;Cflar;Dusp1;Fos;Gpx3;Hgf;Il18bp;Kdm6b;Lcn2;Nono;Pawr;Ptgs2;Rcan1;Rcan2;Sesn1;Tnfaip3;Ucp2;Zc3h12a
GO:0045444	fat cell differentiation	http://amigo.geneontology.org/amigo/term/GO:0045444	0.47946	1.75814	0.00907029	0.0238773	32	./Project_wg_result1631091410_GSEA/GO_0045444.png	18	16324;19225;12608;12703;12156;22695;230738;15205;16913;228775;26903;53322;15902;210029;231991;12457;12609;63953	Bmp2;Cebpb;Cebpd;Creb5;Dusp10;Dysf;Hes1;Id2;Inhbb;Metrnl;Noct;Nucb2;Psmb8;Ptgs2;Socs1;Trib3;Zc3h12a;Zfp36
GO:0045861	negative regulation of proteolysis	http://amigo.geneontology.org/amigo/term/GO:0045861	0.435052	1.76067	0.00442478	0.0239561	46	./Project_wg_result1631091410_GSEA/GO_0045861.png	16	11820;238393;20715;13025;19225;13024;12258;12268;11796;15511;12633;21859;15234;13014;216869;13601	App;Arrb2;Birc3;C4b;Cflar;Cstb;Ctla2a;Ctla2b;Ecm1;Hgf;Hspa1b;Ptgs2;Serpina3f;Serpina3g;Serping1;Timp3
GO:0002253	activation of immune response	http://amigo.geneontology.org/amigo/term/GO:0002253	0.396313	1.74037	0.00220751	0.0264653	66	./Project_wg_result1631091410_GSEA/GO_0002253.png	25	246746;16362;226691;381308;15461;226695;12258;102639543;53610;15951;12268;21929;12475;58185;22637;114774;230738;24088;50909;74136;18035;216869;217715;80861;12927	Arrb2;Bcar1;C1ra;C4b;Cd14;Cd300lf;Dhx58;Eif2b2;Hras;Ifi204;Ifi205;Ifi206;Ifi207;Ifi211;Irf1;Nfkbia;Nono;Pawr;Rsad2;Sec14l1;Serping1;Tlr2;Tnfaip3;Zap70;Zc3h12a
GO:0072593	reactive oxygen species metabolic process	http://amigo.geneontology.org/amigo/term/GO:0072593	0.431733	1.73506	0.00869565	0.027417	45	./Project_wg_result1631091410_GSEA/GO_0072593.png	18	14825;140742;16007;19225;12575;11796;100503605;12633;14778;19223;230738;19219;12257;24088;15894;14219;14991;16418	Birc3;Ccn1;Ccn2;Cdkn1a;Cflar;Cxcl1;Eif6;Gpx3;H2-M3;Hbb-bs;Icam1;Ptger4;Ptgis;Ptgs2;Sesn1;Tlr2;Tspo;Zc3h12a
GO:2001233	regulation of apoptotic signaling pathway	http://amigo.geneontology.org/amigo/term/GO:2001233	0.391779	1.71902	0.0045977	0.0313837	61	./Project_wg_result1631091410_GSEA/GO_2001233.png	28	16324;414801;19225;27279;16149;11910;53610;18413;21929;79201;12633;21859;15234;15894;16905;216869;17319;12044;12045;69660;12047;12048;20439;58801;171543;17210;19165;18453	Arrb2;Atf3;Bcl2a1a;Bcl2a1b;Bcl2a1d;Bcl2l1;Bmf;Cd74;Cflar;Hgf;Icam1;Inhbb;Itprip;Lmna;Mcl1;Mif;Nono;Osm;P4hb;Pmaip1;Psen2;Ptgs2;Siah2;Timp3;Tmbim1;Tnfaip3;Tnfrsf12a;Tnfrsf23
GO:0070997	neuron death	http://amigo.geneontology.org/amigo/term/GO:0070997	0.399774	1.70451	0.00863931	0.0351645	50	./Project_wg_result1631091410_GSEA/GO_0070997.png	10	11820;20302;20293;14281;15461;17748;12608;53610;11501;20304	Adam8;App;Ccl12;Ccl3;Ccl5;Cebpb;Fos;Hras;Mt1;Nono
GO:0033002	muscle cell proliferation	http://amigo.geneontology.org/amigo/term/GO:0033002	0.416964	1.70217	0.00849257	0.0352685	42	./Project_wg_result1631091410_GSEA/GO_0033002.png	19	11504;30878;19225;15200;20304;12575;18712;21929;16009;12633;11815;211770;17125;16476;12534;13609;15902;13653;16194	Adamts1;Apln;Apod;Ccl5;Cdk1;Cdkn1a;Cflar;Egr1;Hbegf;Id2;Igfbp3;Il6ra;Jun;Pim1;Ptgs2;S1pr1;Smad1;Tnfaip3;Trib1
GO:1903706	regulation of hemopoiesis	http://amigo.geneontology.org/amigo/term/GO:1903706	0.3923	1.69646	0.00649351	0.0363186	62	./Project_wg_result1631091410_GSEA/GO_1903706.png	26	14825;20302;16362;14281;13024;12608;12703;16149;11501;20304;18712;22695;22637;12571;230738;211770;15205;16186;12010;18035;16476;14991;16418;15284;15902;16859	Adam8;B2m;Ccl3;Ccl5;Cd74;Cdk6;Cebpb;Ctla2a;Cxcl1;Eif6;Fos;H2-M3;Hes1;Hlx;Id2;Il2rg;Irf1;Jun;Lgals9;Nfkbia;Pim1;Socs1;Trib1;Zap70;Zc3h12a;Zfp36
GO:0048871	multicellular organismal homeostasis	http://amigo.geneontology.org/amigo/term/GO:0048871	0.401264	1.67689	0.00881057	0.0406931	48	./Project_wg_result1631091410_GSEA/GO_0048871.png	15	30878;16373;246256;19225;333654;12608;11501;20304;23794;216850;209039;16819;22228;20750;19219	Adam8;Adamts5;Apln;Ccl5;Cebpb;Fcgr4;Irx3;Kdm6b;Lcn2;Ppp1r13l;Ptger4;Ptgs2;Spp1;Tns2;Ucp2
GO:0001906	cell killing	http://amigo.geneontology.org/amigo/term/GO:0001906	0.517492	1.6772	0.00604839	0.0411657	20	./Project_wg_result1631091410_GSEA/GO_0001906.png	11	14825;20296;110557;52118;14972;15039;15040;12010;216869;14991;16859	Arrb2;B2m;Ccl2;Cxcl1;H2-K1;H2-M3;H2-Q6;H2-T22;H2-T23;Lgals9;Pvr
GO:0042326	negative regulation of phosphorylation	http://amigo.geneontology.org/amigo/term/GO:0042326	0.377154	1.67792	0.00443459	0.041467	66	./Project_wg_result1631091410_GSEA/GO_0042326.png	24	12702;16362;13537;414801;17872;12703;22375;11910;17472;19252;24066;12575;21929;11796;16009;17873;21859;78388;230738;15234;211770;228775;216869;16476	Arrb2;Atf3;Birc3;Cdkn1a;Dusp1;Dusp2;Gadd45b;Gbp4;Hgf;Igfbp3;Irf1;Itprip;Jun;Mvp;Ppp1r15a;Socs1;Socs3;Spry4;Timp3;Tnfaip3;Trib1;Trib3;Wars;Zc3h12a
GO:0050663	cytokine secretion	http://amigo.geneontology.org/amigo/term/GO:0050663	0.462013	1.66159	0.0171674	0.0453093	28	./Project_wg_result1631091410_GSEA/GO_0050663.png	12	20302;12703;229898;12363;18413;21929;12475;230738;19219;24088;26903;17319	Casp4;Ccl3;Cd14;Dysf;Gbp5;Mif;Osm;Ptger4;Socs1;Tlr2;Tnfaip3;Zc3h12a
GO:0002250	adaptive immune response	http://amigo.geneontology.org/amigo/term/GO:0002250	0.387234	1.65296	0.00813008	0.0480085	56	./Project_wg_result1631091410_GSEA/GO_0002250.png	25	16068;16362;20715;14728;15461;110557;16149;12258;52118;12268;21929;58185;22637;14972;230738;15039;15040;15894;12010;50909;17319;14991;15284;16859;12051	B2m;Bcl3;C1ra;C4b;Cd74;H2-K1;H2-M3;H2-Q6;H2-T22;H2-T23;Hlx;Hras;Icam1;Il18bp;Irf1;Lgals9;Lilrb4a;Mif;Pvr;Rsad2;Serpina3g;Serping1;Tnfaip3;Zap70;Zc3h12a
GO:0098754	detoxification	http://amigo.geneontology.org/amigo/term/GO:0098754	0.493389	1.64974	0.0164609	0.0484033	20	./Project_wg_result1631091410_GSEA/GO_0098754.png	6	140742;19225;17748;17750;100503605;14778	Gpx3;Hbb-bs;Mt1;Mt2;Ptgs2;Sesn1

## Sheet: Enriched Gene Sets Annotation
		Category
	GO Term	Immunity	Angiogenesis	Others
	Response to interferon gamma	1
	Response to molecule of bacterial origin	1
	Cellular response to biotic stimulus	1
	positive regulation of defense response	1
	ERK1 and ERK2 cascade			1
	Response to tumor necrosis factor	1
	Angiogenesis		1
	Extrinsic apoptotic signalling pathway	1
	Cytokine-mediated signalling pathway	1
	Regulation of innate immune response	1
	Cellular divalent inrganic cation homeostasis			1
	multi-multicellular organism process	1
	repsonse to virus	1
	interspecies interaction between organisms	1
	response to interleukin-1	1
	antigen processing and presentation	1
	regulation of multi-organism process	1
	negative regulation of defense response	1
	regulation of inflammatory response	1
	regeneration		1
	response to peptide			1
	calcium ion homeostasis			1
	response to purin-containing compound			1
	leukocyte migration	1
	muscle cell differentiation			1
	regulation of peptidase activity			1
	regulation of protein modification by small protein conjugation or removal			1
	regulation of immune effector process	1
	cellular response to external stimulus	1
	regulation of peptide secretion			1
	TOTAL	19	2	9
