# Supplementary figures and images for: Immunopathology and Trypanosoma congolense parasite sequestration cause acute cerebral trypanosomiasis
Source: eLife journal article supplement (doi:10.7554/elife.77440), 2022-07-05

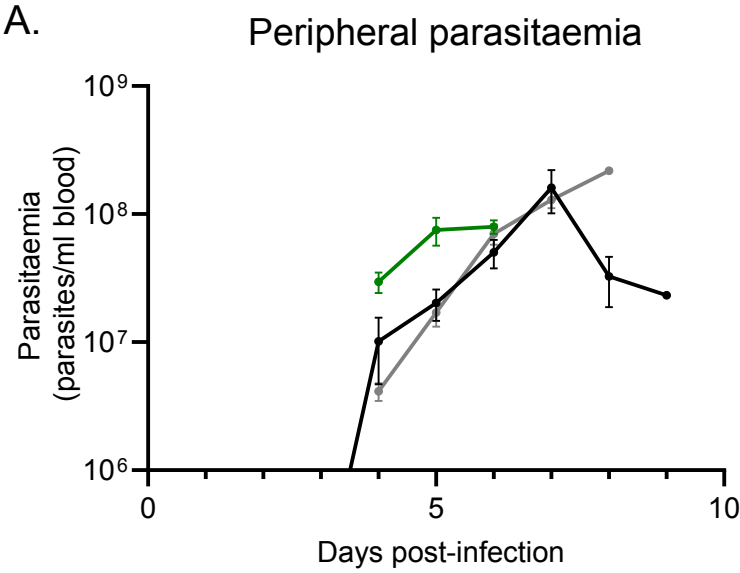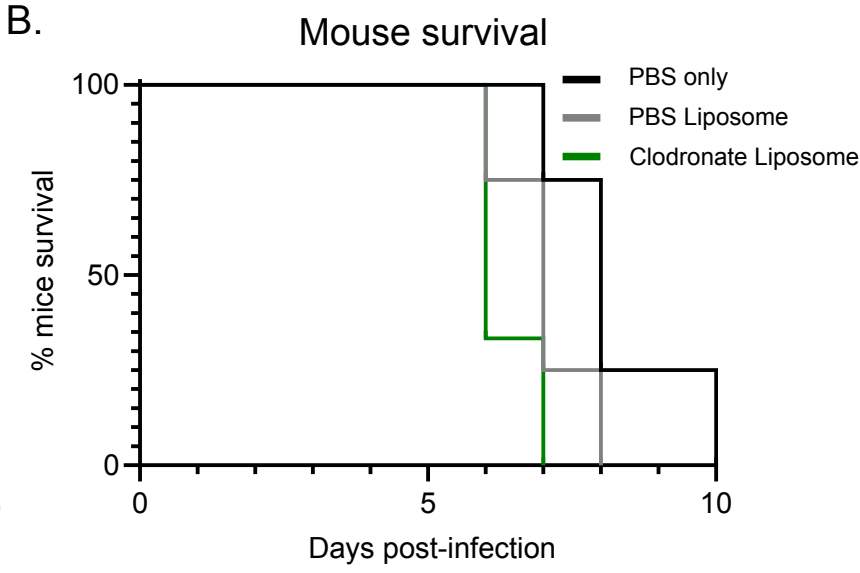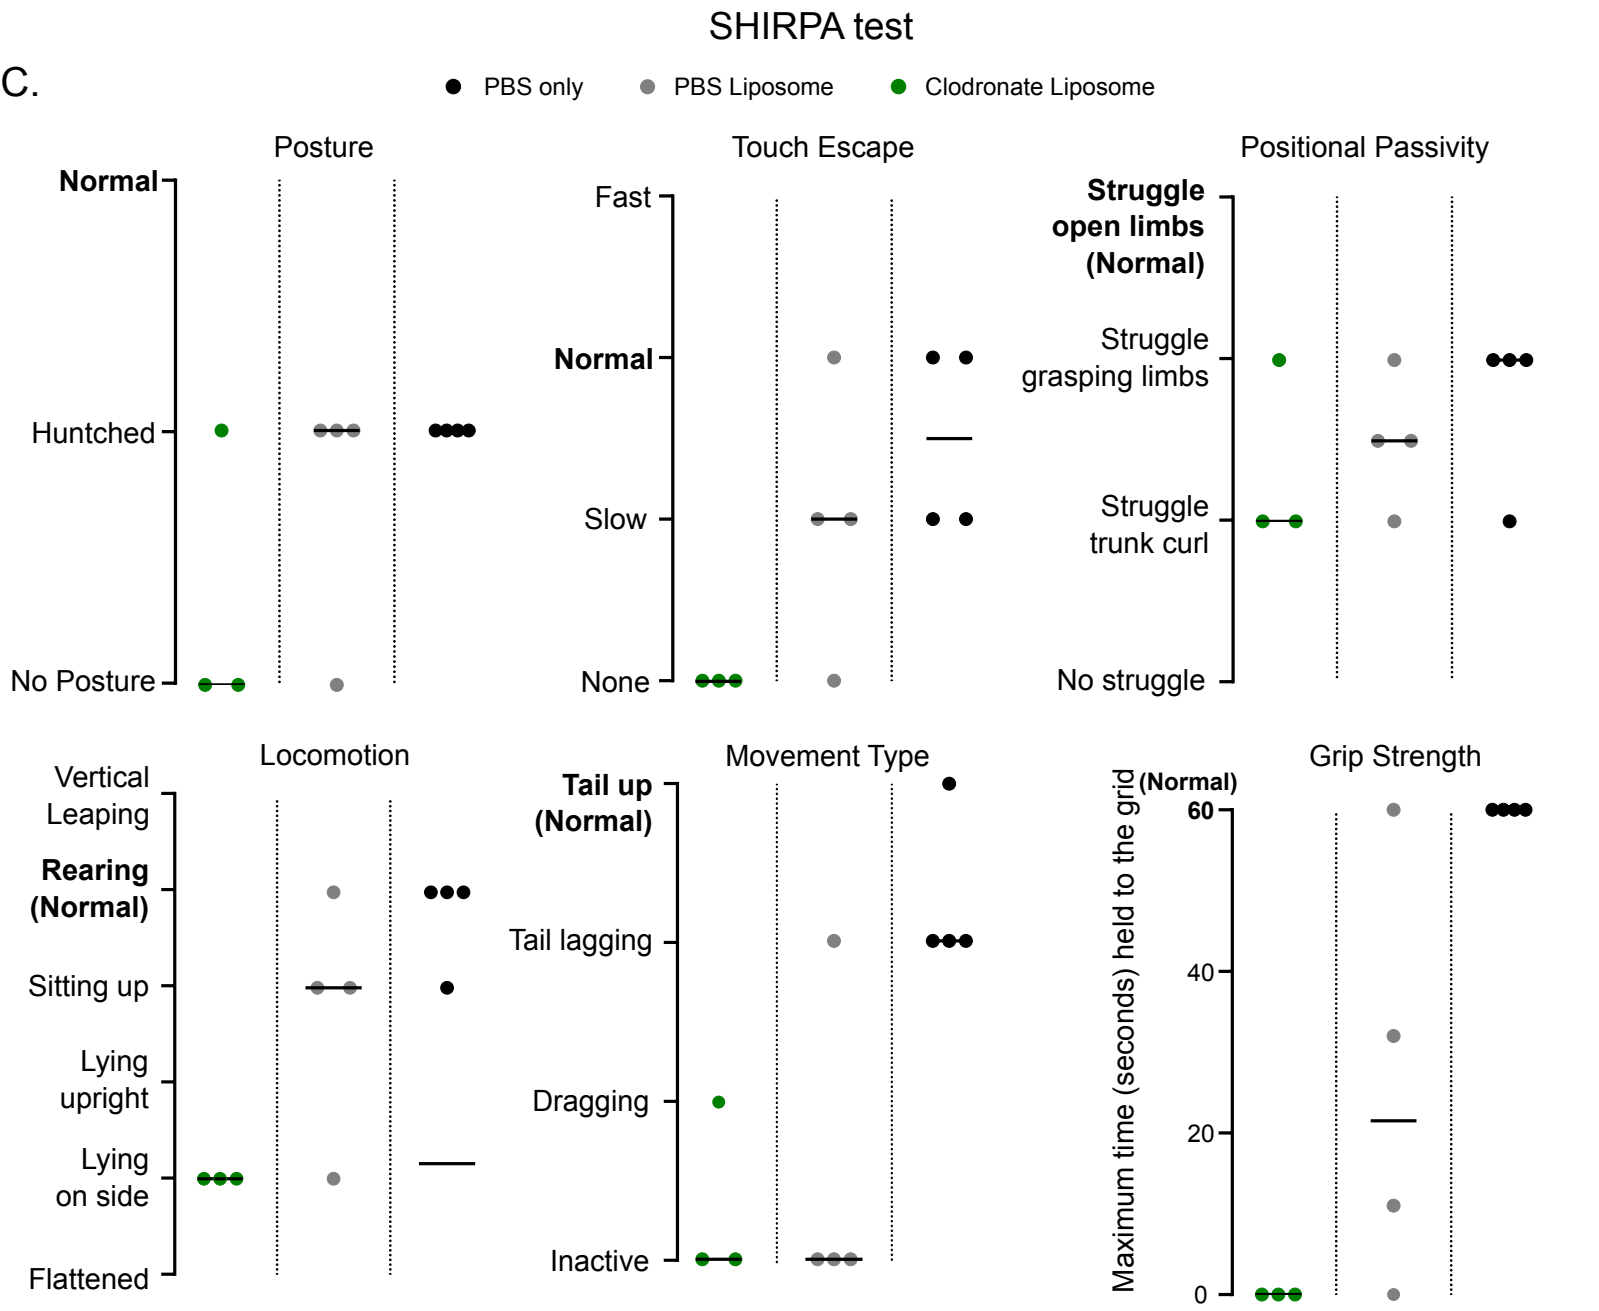

Supplement: supp [file elife-77440-supp-v1.zip]

## Parasite sequestration *in vitro*

A.

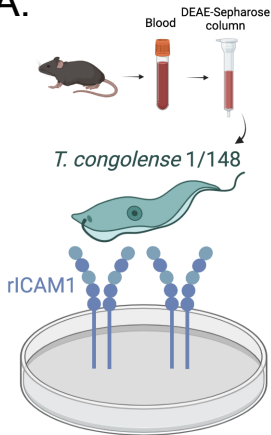

B.

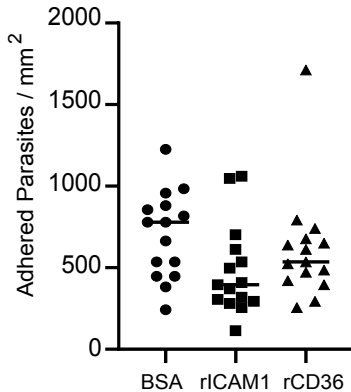

Supplement: supp [file elife-77440-supp-v1.zip]

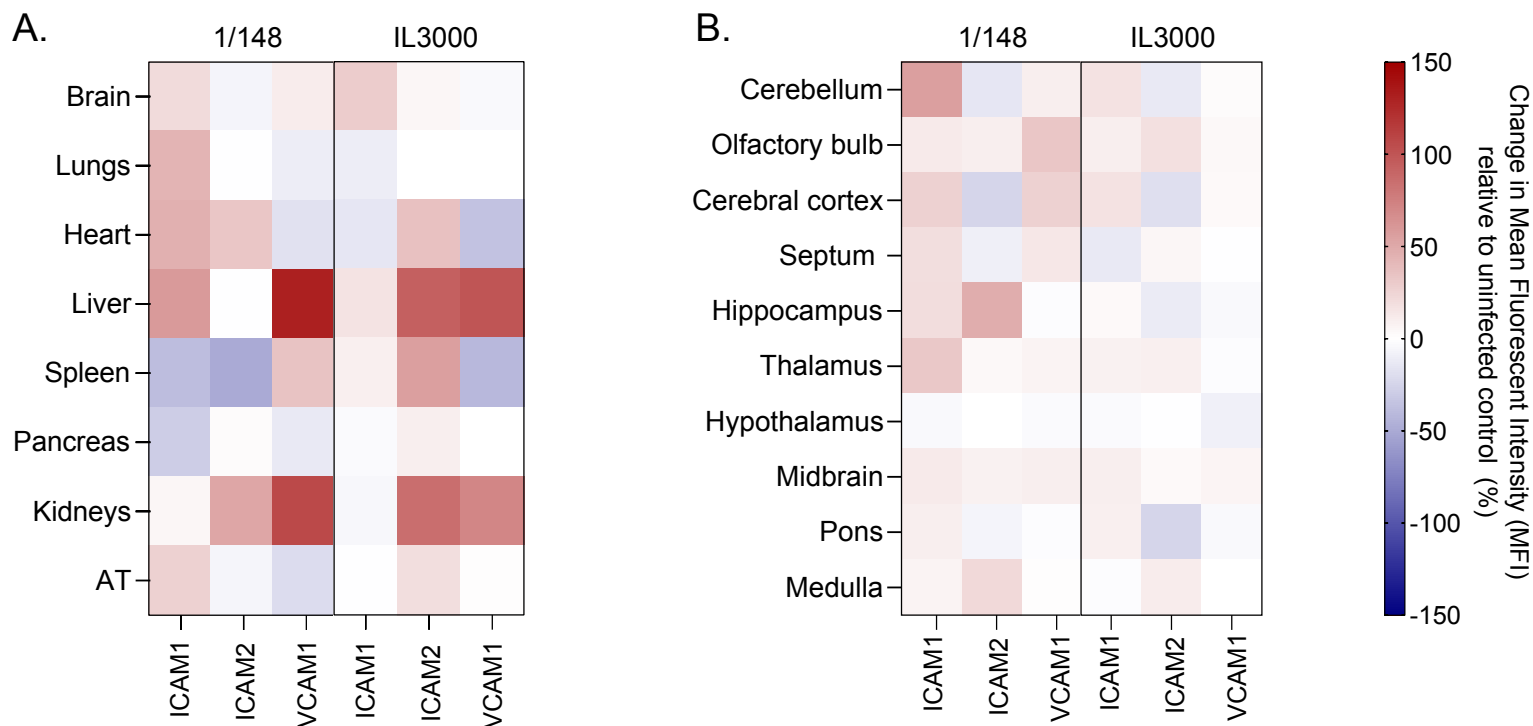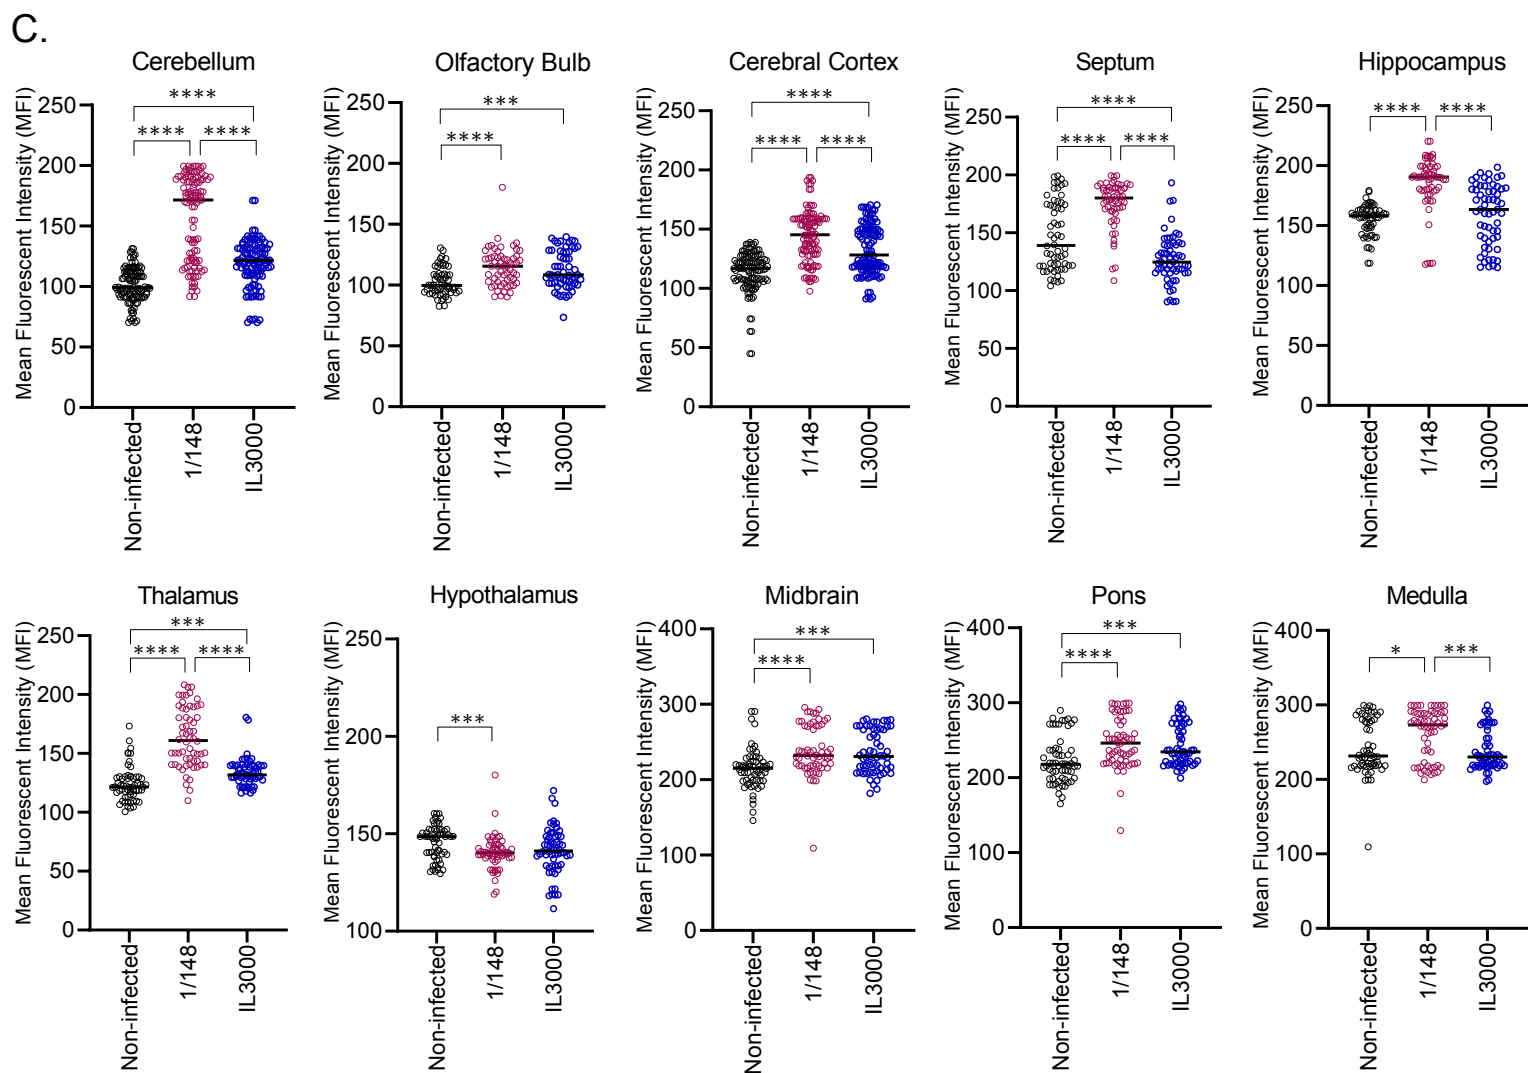

Supplement: supp [file elife-77440-supp-v1.zip]

BV510-Zombie Aqua

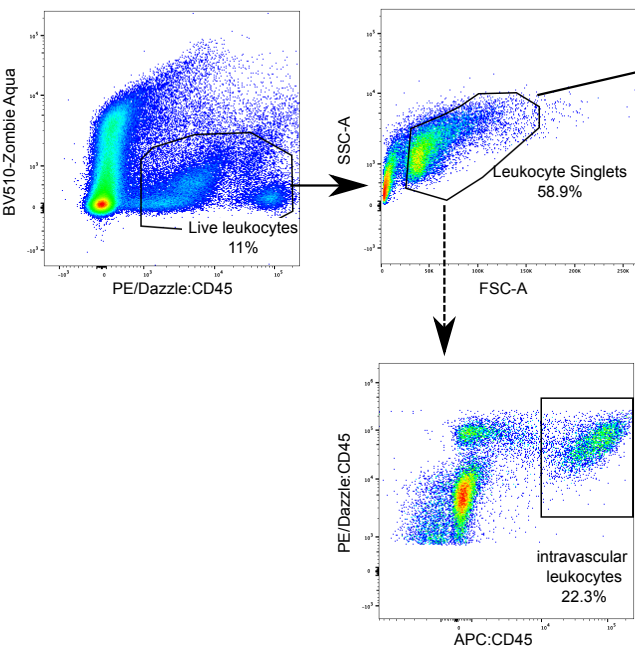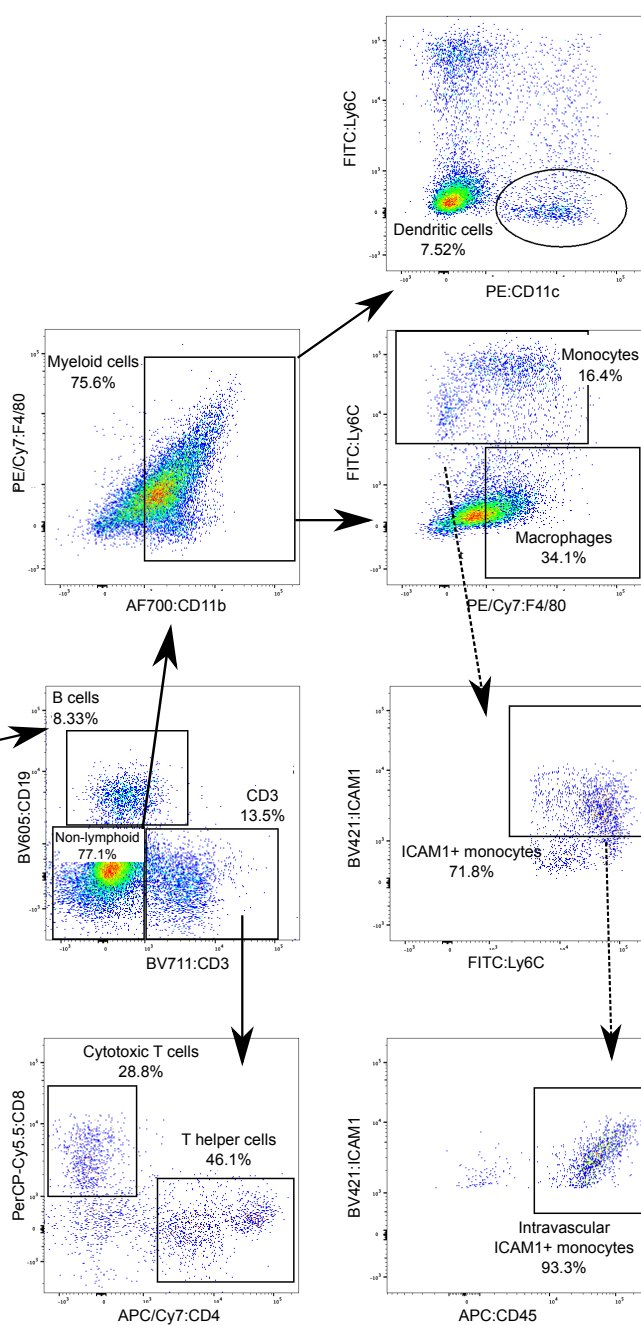

Supplement: supp [file elife-77440-supp-v1.zip]

A.

Live, single leukocytes (CD45<sup>+</sup>)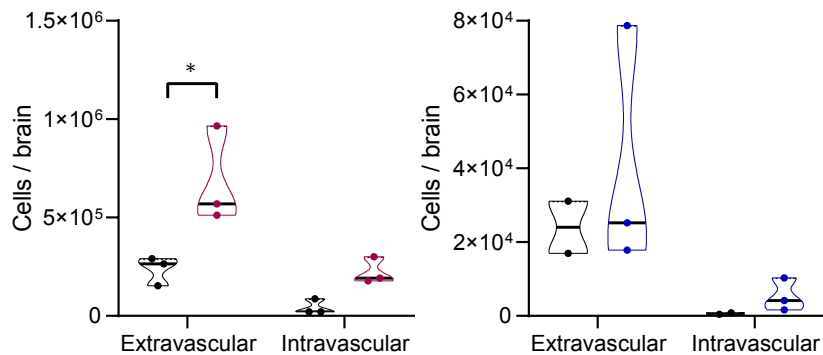

B.

 Non-Infected
  Infected
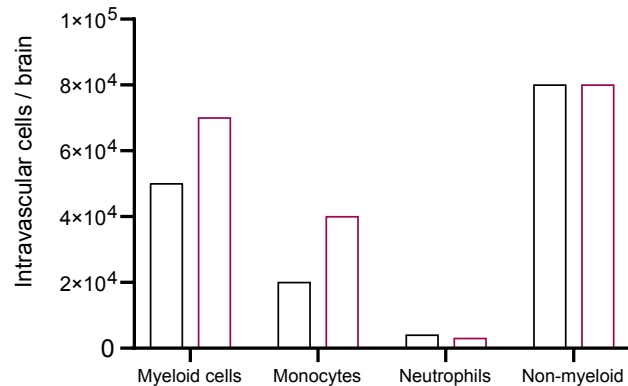

C.

Intravascular ICAM1<sup>+</sup> cells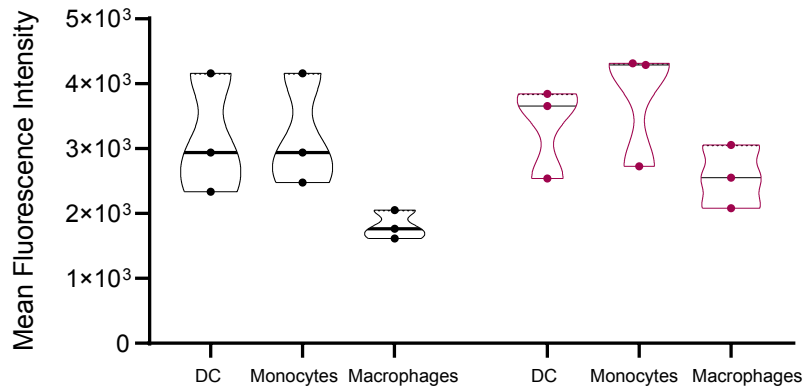

Supplement: supp [file elife-77440-supp-v1.zip]

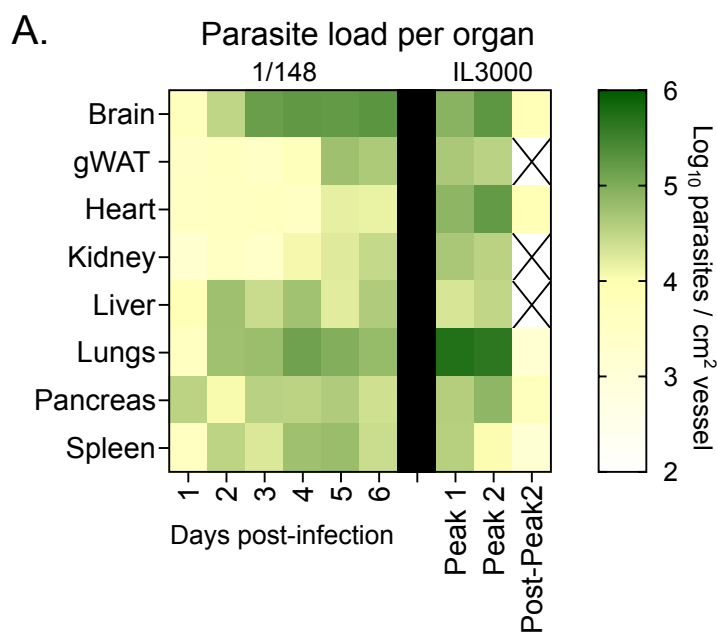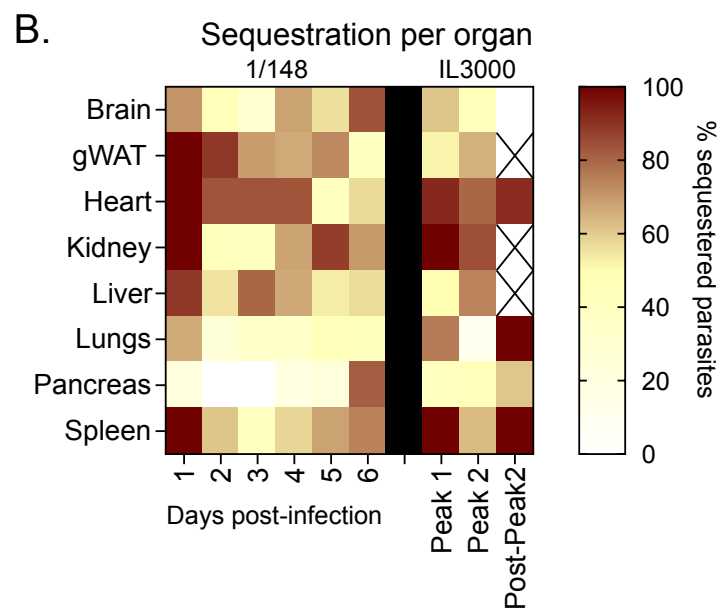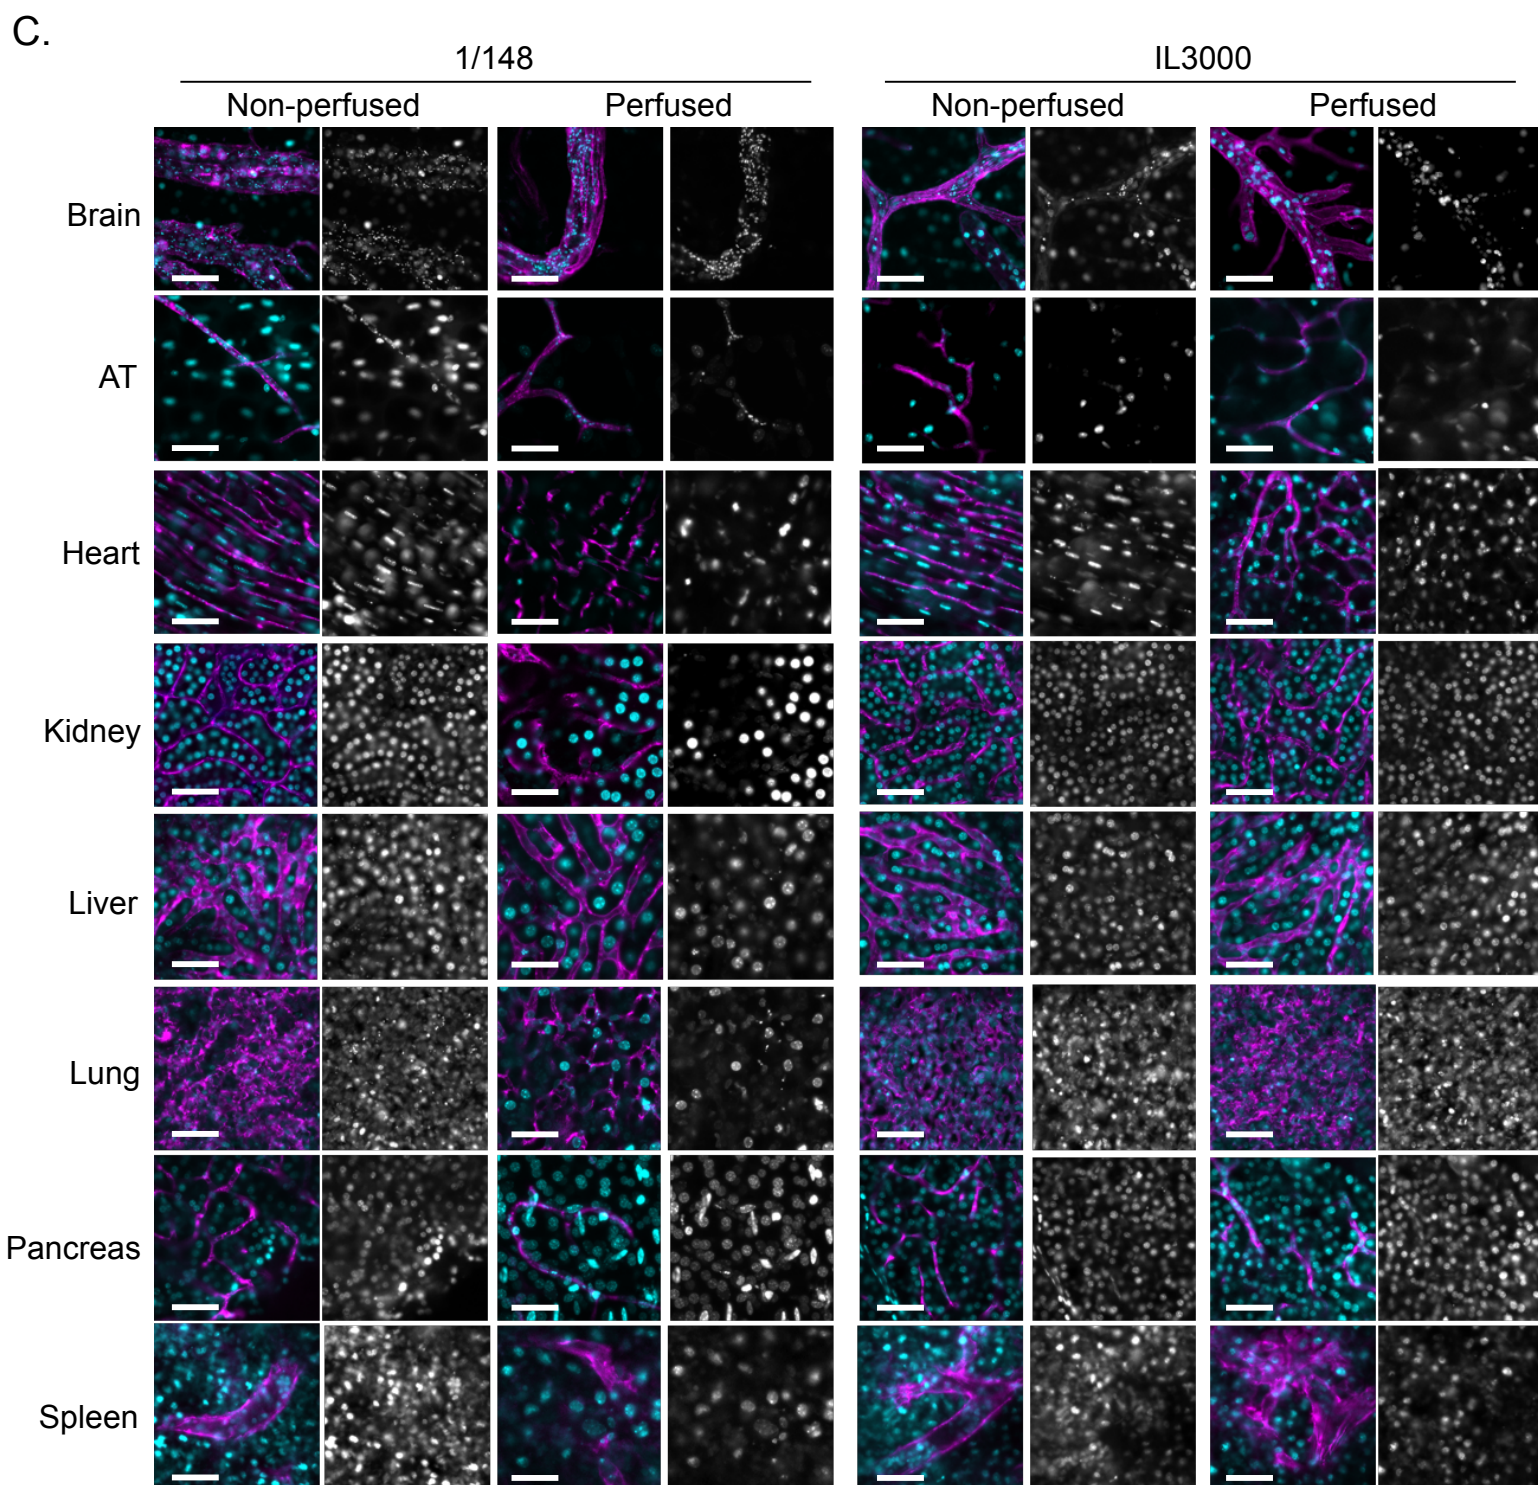

Supplement: supp [file elife-77440-supp-v1.zip]
